# Supplementary material for: R-loop proximity proteomics identifies a role of DDX41 in transcription-associated genomic instability
Source: Research Square preprint supplement (doi:10.21203/rs.3.rs-337351/v1), 2021-04-26
Supplement: Supplementary file 1 [file 23dfed60cfade7b7f0021eb3.xlsx]

## Sheet: down
gene_name	Fold	p.value	FDR	geneId	transcriptId	distanceToTSS	CPG	start	end	Conc	annotation	geneChr
CTA-992D9.7	-5.09	3.42e-17	1.8e-12	ENSG00000231405.1	ENST00000430468.1	26861	no_CPG	27170339	27171339	4.67	Distal Intergenic	22
RTEL1P1	-4.67	1.05e-11	1.85e-07	ENSG00000251441.2	ENST00000504490.2	4962	no_CPG	112361097	112362097	3.72	Intron (ENST00000458497.5/ENSG00000073331.17, intron 2 of 15)	4
MIR4675	-4.51	7.23e-12	1.85e-07	ENSG00000265372.1	ENST00000577898.1	70672	no_CPG	20622642	20623642	3.55	Distal Intergenic	10
KRT75	-4.41	4.5e-10	2.97e-06	ENSG00000170454.5	ENST00000252245.5	-1145	no_CPG	52435670	52436670	3.68	Promoter (1-2kb)	12
AP001891.1	-4.39	8.62e-11	7.62e-07	ENSG00000236437.1	ENST00000452629.1	18680	no_CPG	116480950	116481950	3.43	Distal Intergenic	11
MAD1L1	-4.39	8.67e-11	7.62e-07	ENSG00000002822.15	ENST00000491858.5	17049	no_CPG	2157336	2158336	4	Intron (ENST00000265854.11/ENSG00000002822.15, intron 8 of 16)	7
ZBTB20	-4.37	1.13e-09	5.43e-06	ENSG00000181722.16	ENST00000474710.5	2645	no_CPG	114379996	114380996	3.43	Promoter (2-3kb)	3
SLC25A47P1	-4.28	1.01e-09	5.34e-06	ENSG00000254799.1	ENST00000531577.1	-3841	no_CPG	59267643	59268643	3.32	Downstream (<1kb)	11
PMS2CL	-4.09	8.06e-09	1.85e-05	ENSG00000187953.10	ENST00000486256.5	0	no_CPG	6709505	6710505	3.39	Promoter (<=1kb)	7
PAX8	-4.07	9.44e-08	0.000102	ENSG00000125618.16	ENST00000429538.7	-9514	no_CPG	113288464	113289464	3.37	Distal Intergenic	2
NFATC1	-4.02	7.81e-09	1.85e-05	ENSG00000131196.17	ENST00000586695.1	19458	no_CPG	79546577	79547577	3.09	Distal Intergenic	18
RP11-146E23.2	-3.94	2.49e-08	4.24e-05	ENSG00000253283.1	ENST00000522168.1	-29959	no_CPG	85055656	85056656	3.23	Distal Intergenic	8
RN7SKP157	-3.93	6.57e-10	3.85e-06	ENSG00000251983.1	ENST00000516174.1	5450	no_CPG	62152115	62153115	4.24	Distal Intergenic	5
LINC01289	-3.82	5.62e-09	1.58e-05	ENSG00000253734.1	ENST00000519550.1	196659	no_CPG	63966089	63967089	3.71	Intron (ENST00000523191.5/ENSG00000253554.5, intron 4 of 5)	8
CH17-333M13.2	-3.74	0.000195	0.0171	ENSG00000276118.1	ENST00000612151.1	-147525	no_CPG	143194655	143195655	2.74	Distal Intergenic	1
RP11-508M8.1	-3.7	2.94e-07	0.000218	ENSG00000249365.1	ENST00000512965.1	67267	no_CPG	125175471	125176471	3.33	Distal Intergenic	5
GLI3	-3.69	5.36e-08	6.97e-05	ENSG00000106571.12	ENST00000464291.1	96974	no_CPG	41879948	41880948	3.6	Distal Intergenic	7
RP11-588D3.1	-3.68	6.75e-09	1.69e-05	ENSG00000240752.1	ENST00000474387.1	-4164	no_CPG	78753810	78754810	3.81	Intron (ENST00000618833.4/ENSG00000169855.19, intron 2 of 27)	3
SOX9-AS1	-3.59	2.39e-07	0.000201	ENSG00000234899.9	ENST00000414600.1	4328	no_CPG	72136452	72137452	3.5	Intron (ENST00000628742.2/ENSG00000234899.9, intron 2 of 6)	17
AC112715.2	-3.58	2.82e-07	0.000212	ENSG00000224132.2	ENST00000445534.2	19750	no_CPG	237276841	237277841	3.73	Distal Intergenic	2
RP3-431P23.2	-3.55	1.04e-07	0.000104	ENSG00000213065.2	ENST00000392115.2	5505	no_CPG	167762063	167763063	3.69	Distal Intergenic	6
FGGY	-3.49	1.22e-08	2.48e-05	ENSG00000172456.17	ENST00000371210.1	2646	no_CPG	59556564	59557564	3.83	Promoter (2-3kb)	1
RP11-399K21.12	-3.46	9.78e-08	0.000103	ENSG00000279814.1	ENST00000623230.1	47884	no_CPG	75497965	75498965	3.6	Intron (ENST00000611255.4/ENSG00000148655.14, intron 2 of 6)	10
KIAA1671	-3.39	4.5e-10	2.97e-06	ENSG00000197077.13	ENST00000401395.1	13396	no_CPG	25083365	25084365	4.3	Intron (ENST00000406486.8/ENSG00000197077.13, intron 7 of 13)	22
GCK	-3.39	2.95e-08	4.58e-05	ENSG00000106633.15	ENST00000437084.1	10696	no_CPG	44177291	44178291	3.91	Intron (ENST00000403799.7/ENSG00000106633.15, intron 1 of 9)	7
TMPRSS5	-3.36	3.75e-09	1.29e-05	ENSG00000166682.10	ENST00000545265.5	74704	no_CPG	113618033	113619033	4.17	Distal Intergenic	11
RP11-351A20.2	-3.36	4.54e-07	0.000307	ENSG00000260004.1	ENST00000568659.1	2296	no_CPG	65598402	65599402	3.29	Promoter (2-3kb)	16
RP3-435K13.1	-3.34	5.99e-09	1.58e-05	ENSG00000216523.1	ENST00000401925.1	-9869	no_CPG	84976494	84977494	4.15	Distal Intergenic	6
RP11-428C6.2	-3.31	1.1e-08	2.36e-05	ENSG00000259968.3	ENST00000565306.1	64567	no_CPG	74017507	74018507	4.36	Distal Intergenic	5
EEF1DP7	-3.3	2.97e-09	1.12e-05	ENSG00000263883.1	ENST00000580496.1	10432	no_CPG	63647033	63648033	3.96	Intron (ENST00000579585.5/ENSG00000198909.7, intron 5 of 17)	17
KLRD1	-3.26	4.35e-11	5.73e-07	ENSG00000134539.16	ENST00000381908.7	-2598	no_CPG	10300848	10301848	5	Promoter (2-3kb)	12
SCHIP1	-3.24	2.95e-05	0.00608	ENSG00000151967.18	ENST00000445224.6	-1788	no_CPG	159837073	159838073	2.92	Promoter (1-2kb)	3
AC104654.2	-3.22	1.14e-07	0.000111	ENSG00000234362.5	ENST00000427054.5	1939	no_CPG	41930526	41931526	4.03	Promoter (1-2kb)	2
CTB-32P11.1	-3.15	8.57e-07	0.000508	ENSG00000253538.1	ENST00000522426.1	-20182	no_CPG	164188449	164189449	3.32	Intron (ENST00000521805.1/ENSG00000253331.1, intron 4 of 4)	5
HMGN2P30	-3.15	1.78e-05	0.00424	ENSG00000213721.3	ENST00000423237.1	-34345	no_CPG	42078020	42079020	2.85	Intron (ENST00000395925.7/ENSG00000106571.12, intron 3 of 14)	7
CTD-2586B10.1	-3.14	5.28e-08	6.97e-05	ENSG00000268480.1	ENST00000593792.1	195	no_CPG	8630866	8631866	4.08	Promoter (<=1kb)	19
TNR-IT1	-3.13	9.17e-08	0.000101	ENSG00000235628.1	ENST00000455447.1	35849	no_CPG	175519969	175520969	4.19	Intron (ENST00000367674.6/ENSG00000116147.16, intron 2 of 22)	1
RP1-276J11.2	-3.08	3.98e-05	0.00738	ENSG00000220447.1	ENST00000407291.1	886	no_CPG	121382358	121383358	2.78	Promoter (<=1kb)	6
LINC01615	-3.07	1.68e-09	7.21e-06	ENSG00000223485.2	ENST00000449466.1	29170	no_CPG	169132131	169133131	4.61	Distal Intergenic	6
RP13-379L11.2	-3.03	0.00014	0.0143	ENSG00000203971.1	ENST00000371169.1	1597	no_CPG	57957063	57958063	2.74	Promoter (1-2kb)	20
RP3-352A20.1	-3.01	5.36e-09	1.58e-05	ENSG00000213117.4	ENST00000441868.2	-70224	no_CPG	134826650	134827650	4.07	Distal Intergenic	6
MELK	-3.01	2.73e-07	0.000212	ENSG00000165304.7	ENST00000298048.6	-28344	no_CPG	36543518	36544518	3.84	Distal Intergenic	9
ROCK2	-3.01	3.49e-07	0.000252	ENSG00000134318.13	ENST00000484951.1	7291	no_CPG	11213049	11214049	3.86	Intron (ENST00000315872.10/ENSG00000134318.13, intron 17 of 32)	2
RNA5SP362	-2.99	3.91e-09	1.29e-05	ENSG00000251857.1	ENST00000516048.1	0	no_CPG	66065935	66066935	4.62	Promoter (<=1kb)	12
RP11-383J24.1	-2.99	2.52e-07	0.000208	ENSG00000253227.1	ENST00000517482.1	8224	no_CPG	124279907	124280907	4.18	Distal Intergenic	8
RP11-115H15.2	-2.99	2.47e-06	0.00108	ENSG00000258337.1	ENST00000549373.1	-40688	no_CPG	116221983	116222983	3.54	Intron (ENST00000281928.7/ENSG00000123066.7, intron 2 of 30)	12
FANCC	-2.98	5.38e-08	6.97e-05	ENSG00000158169.12	ENST00000493098.1	-47613	no_CPG	95197646	95198646	4.44	Intron (ENST00000289081.7/ENSG00000158169.12, intron 4 of 14)	9
CTD-2281M20.1	-2.98	1.99e-06	0.000916	ENSG00000250891.1	ENST00000515704.1	7706	no_CPG	118553350	118554350	3.53	Intron (ENST00000506769.1/ENSG00000250891.1, intron 1 of 8)	5
RCL1	-2.96	9.16e-05	0.0115	ENSG00000120158.11	ENST00000445485.1	40842	no_CPG	4901296	4902296	2.93	Distal Intergenic	9
CH17-53B9.4	-2.95	0.000546	0.0268	ENSG00000274748.1	ENST00000598588.2	2769	no_CPG	21680855	21681855	2.1	Promoter (2-3kb)	17
EBF1	-2.93	2.27e-05	0.00511	ENSG00000164330.16	ENST00000518323.1	64497	no_CPG	158642512	158643512	3.13	Distal Intergenic	5
SNRPGP9	-2.91	2.74e-07	0.000212	ENSG00000228551.1	ENST00000456025.1	-32367	no_CPG	109218055	109219055	4.11	Intron (ENST00000309415.7/ENSG00000172985.10, intron 1 of 9)	2
VWA5B2	-2.91	5.5e-07	0.00036	ENSG00000145198.14	ENST00000426955.6	-7240	no_CPG	184222189	184223189	3.6	Distal Intergenic	3
NUDT19P4	-2.9	1.35e-06	0.000683	ENSG00000270900.1	ENST00000605501.1	-167105	no_CPG	44730606	44731606	3.46	Distal Intergenic	6
CTD-2218K11.2	-2.89	5.42e-08	6.97e-05	ENSG00000249100.1	ENST00000509506.1	-15184	no_CPG	82749220	82750220	4.08	Distal Intergenic	5
GPC5-AS2	-2.89	8.67e-06	0.00263	ENSG00000232885.1	ENST00000417589.1	-49390	no_CPG	92389993	92390993	3.61	Intron (ENST00000377067.8/ENSG00000179399.14, intron 7 of 7)	13
PTGER2	-2.88	1.32e-06	0.000675	ENSG00000125384.6	ENST00000245457.5	37013	no_CPG	52351408	52352408	3.97	Distal Intergenic	14
LINC00511	-2.87	5.66e-08	7.11e-05	ENSG00000227036.6	ENST00000457958.6	11218	no_CPG	72580122	72581122	3.95	Intron (ENST00000581801.5/ENSG00000227036.6, intron 1 of 2)	17
CTNNBIP1	-2.87	3.77e-07	0.000265	ENSG00000178585.14	ENST00000377256.1	-3249	no_CPG	9881425	9882425	3.85	Intron (ENST00000377263.5/ENSG00000178585.14, intron 2 of 5)	1
RP11-122C5.3	-2.87	7.77e-07	0.000471	ENSG00000250629.1	ENST00000514586.1	0	no_CPG	38782809	38783809	4.44	Promoter (<=1kb)	5
RP11-171N4.4	-2.87	7.95e-06	0.00245	ENSG00000248912.1	ENST00000512609.1	23681	no_CPG	156710345	156711345	3.58	Distal Intergenic	4
RP11-451F20.1	-2.87	2.21e-05	0.00503	ENSG00000250292.1	ENST00000514910.1	-24233	no_CPG	183355112	183356112	3.6	Distal Intergenic	4
TIAF1	-2.85	1.24e-06	0.000653	ENSG00000221995.5	ENST00000359450.6	0	no_CPG	29078405	29079405	3.23	Promoter (<=1kb)	17
RP11-386D6.1	-2.85	3.48e-06	0.00137	ENSG00000254115.1	ENST00000519041.1	6873	no_CPG	86714420	86715420	3.57	Intron (ENST00000519041.1/ENSG00000254115.1, intron 1 of 2)	8
EXT1	-2.84	2.67e-08	4.28e-05	ENSG00000182197.10	ENST00000436216.1	80134	no_CPG	118029280	118030280	4.56	Intron (ENST00000378204.6/ENSG00000182197.10, intron 1 of 10)	8
LINC00877	-2.84	4.32e-08	6.52e-05	ENSG00000241163.7	ENST00000626474.2	4359	no_CPG	72274144	72275144	4.39	Exon (ENST00000626474.2/ENSG00000241163.7, exon 2 of 5)	3
CTD-2186M15.3	-2.84	2.36e-06	0.00105	ENSG00000272086.1	ENST00000606994.1	18781	no_CPG	32193252	32194252	3.83	Distal Intergenic	5
RP11-138M12.1	-2.83	9.11e-05	0.0115	ENSG00000228704.1	ENST00000430672.1	-66235	no_CPG	125511418	125512418	3.24	Distal Intergenic	6
RP11-499F19.3	-2.83	0.000105	0.0122	ENSG00000283383.1	ENST00000636764.1	7929	no_CPG	183756792	183757792	2.82	Distal Intergenic	4
DNAH14	-2.81	7.12e-08	8.17e-05	ENSG00000185842.14	ENST00000445597.6	-16209	no_CPG	224879053	224880053	3.77	Distal Intergenic	1
GALNT15	-2.81	2e-06	0.000916	ENSG00000131386.17	ENST00000339732.9	-25093	no_CPG	16148556	16149556	3.67	Distal Intergenic	3
APP	-2.8	1.21e-06	0.000653	ENSG00000142192.20	ENST00000491395.5	52040	no_CPG	25997978	25998978	3.67	Intron (ENST00000346798.7/ENSG00000142192.20, intron 7 of 17)	21
RP11-313C15.2	-2.8	2.04e-06	0.00093	ENSG00000278193.1	ENST00000611632.1	-13903	no_CPG	72675373	72676373	3.66	Intron (ENST00000523207.1/ENSG00000182674.5, intron 2 of 2)	8
AC023669.1	-2.8	3.23e-06	0.00132	ENSG00000229459.1	ENST00000414915.1	-44334	no_CPG	46215730	46216730	3.67	Distal Intergenic	7
SPINT2	-2.78	2.68e-05	0.00565	ENSG00000167642.12	ENST00000587334.1	60	no_CPG	38290247	38291247	3.18	Promoter (<=1kb)	19
RP4-761I2.5	-2.77	1.25e-06	0.000653	ENSG00000271245.1	ENST00000605568.1	-5927	no_CPG	11161077	11162077	3.88	Distal Intergenic	6
PPCDC	-2.77	0.00061	0.0279	ENSG00000138621.11	ENST00000563393.1	-6343	no_CPG	75035932	75036932	2.76	Intron (ENST00000342932.7/ENSG00000138621.11, intron 2 of 5)	15
RP11-699L21.2	-2.75	1.02e-06	0.000589	ENSG00000238043.1	ENST00000426616.1	1315	no_CPG	193981929	193982929	4.07	Promoter (1-2kb)	3
DRD1	-2.75	1.25e-06	0.000653	ENSG00000184845.3	ENST00000393752.2	57626	no_CPG	175385582	175386582	4.16	Distal Intergenic	5
RNU7-8P	-2.75	1.29e-05	0.0034	ENSG00000251767.1	ENST00000515958.1	53128	no_CPG	77473453	77474453	3.34	Intron (ENST00000354567.6/ENSG00000154027.18, intron 8 of 13)	1
AC093166.1	-2.74	1.53e-06	0.000739	ENSG00000237583.1	ENST00000457867.1	19300	no_CPG	111694326	111695326	3.96	Distal Intergenic	2
TRPM6	-2.74	1.93e-06	0.0009	ENSG00000119121.21	ENST00000483186.1	8803	no_CPG	74824254	74825254	3.73	Intron (ENST00000361255.7/ENSG00000119121.21, intron 7 of 38)	9
Y_RNA	-2.73	7.72e-07	0.000471	ENSG00000206792.1	ENST00000384065.1	41091	no_CPG	12012835	12013835	3.7	Distal Intergenic	23
SULF2	-2.73	2.84e-06	0.0012	ENSG00000196562.14	ENST00000484875.5	-8366	no_CPG	47794982	47795982	3.6	Distal Intergenic	20
AC114814.2	-2.72	1.78e-09	7.21e-06	ENSG00000231032.1	ENST00000419195.1	-1430	no_CPG	235148930	235149930	4.7	Promoter (1-2kb)	2
BTBD16	-2.72	0.000132	0.0138	ENSG00000138152.8	ENST00000507495.1	-3560	no_CPG	122286521	122287521	3.14	Intron (ENST00000260723.4/ENSG00000138152.8, intron 5 of 15)	10
RP11-382A18.3	-2.71	2.16e-07	0.000187	ENSG00000271509.1	ENST00000605028.1	-8240	no_CPG	127282993	127283993	4.44	Distal Intergenic	8
RN7SKP157	-2.71	2.4e-07	0.000201	ENSG00000251983.1	ENST00000516174.1	2524	no_CPG	62149189	62150189	4.44	Promoter (2-3kb)	5
TNFRSF11B	-2.71	3.72e-07	0.000265	ENSG00000164761.8	ENST00000297350.8	-9325	no_CPG	118961525	118962525	4.3	Distal Intergenic	8
MICALL1	-2.71	3.66e-06	0.00143	ENSG00000100139.13	ENST00000445494.5	-6184	no_CPG	37898473	37899473	3.93	Distal Intergenic	22
NPR3	-2.7	2.68e-08	4.28e-05	ENSG00000113389.15	ENST00000507141.1	73051	no_CPG	32785382	32786382	5.81	3' UTR	5
AC010886.2	-2.69	1.71e-08	3.14e-05	ENSG00000224414.1	ENST00000437380.1	-1373	no_CPG	217691522	217692522	4.56	Promoter (1-2kb)	2
NPHP3-ACAD11	-2.69	3.59e-05	0.0069	ENSG00000274810.3	ENST00000471702.2	-99420	no_CPG	132821879	132822879	3.44	Intron (ENST00000504440.1/ENSG00000248724.6, intron 8 of 10)	3
LINC01504	-2.68	8.96e-08	0.000101	ENSG00000225434.2	ENST00000451152.1	9809	no_CPG	72315326	72316326	4.56	Exon (ENST00000451596.2/ENSG00000225434.2, exon 2 of 2)	9
RNU6-229P	-2.68	3.02e-05	0.00614	ENSG00000252423.1	ENST00000516614.1	5513	no_CPG	69394790	69395790	4.01	Intron (ENST00000435148.1/ENSG00000225718.1, intron 1 of 2)	7
FIGN	-2.67	1.9e-05	0.00445	ENSG00000182263.13	ENST00000409634.5	-64559	no_CPG	163800571	163801571	3.42	Intron (ENST00000429636.1/ENSG00000237844.1, intron 4 of 4)	2
C16orf97	-2.67	4.56e-05	0.00789	ENSG00000261190.5	ENST00000566314.5	-22725	no_CPG	52050096	52051096	3.25	Intron (ENST00000568524.5/ENSG00000261190.5, intron 3 of 3)	16
RP4-794H19.1	-2.66	1.16e-07	0.000111	ENSG00000232453.6	ENST00000634986.1	10164	no_CPG	58874498	58875498	4.07	Intron (ENST00000419531.2/ENSG00000234807.5, intron 1 of 3)	1
RP11-513H8.1	-2.66	5.51e-06	0.00188	ENSG00000253627.1	ENST00000523317.1	-20246	no_CPG	134340693	134341693	3.78	Distal Intergenic	8
LINC00662	-2.66	1.75e-05	0.00421	ENSG00000261824.6	ENST00000561521.1	6608	no_CPG	27738622	27739622	4.48	Intron (ENST00000588027.5/ENSG00000261824.6, intron 1 of 2)	19
RP1-145M24.1	-2.65	1e-07	0.000104	ENSG00000254708.1	ENST00000531489.1	32860	no_CPG	34302143	34303143	4.46	Intron (ENST00000435224.2/ENSG00000166016.5, intron 1 of 16)	11
CTD-2315A10.2	-2.65	5.51e-06	0.00188	ENSG00000258685.2	ENST00000556311.2	27834	no_CPG	59107587	59108587	3.66	Distal Intergenic	14
RP11-977P2.1	-2.65	2.61e-05	0.00552	ENSG00000256513.1	ENST00000537327.1	45084	no_CPG	28779747	28780747	3.25	Distal Intergenic	12
SMARCE1P4	-2.64	1.64e-06	0.000777	ENSG00000253650.1	ENST00000523647.1	79106	no_CPG	37174256	37175256	4.39	Distal Intergenic	8
AC112715.2	-2.64	4.75e-06	0.0017	ENSG00000224132.2	ENST00000445534.2	22839	no_CPG	237279930	237280930	3.76	Distal Intergenic	2
NMI	-2.63	5e-08	6.97e-05	ENSG00000123609.10	ENST00000243346.9	-16225	no_CPG	151306282	151307282	4.63	Distal Intergenic	2
MYT1L	-2.63	6.75e-06	0.00222	ENSG00000186487.17	ENST00000485348.1	-32567	no_CPG	2012117	2013117	3.62	Intron (ENST00000399161.6/ENSG00000186487.17, intron 4 of 24)	2
FAM198B	-2.63	3.01e-05	0.00614	ENSG00000164125.15	ENST00000590648.5	-1581	no_CPG	158161262	158162262	3.52	Promoter (1-2kb)	4
APOLD1	-2.61	7.66e-07	0.000471	ENSG00000178878.12	ENST00000356591.4	5948	no_CPG	12791555	12792555	4.9	Intron (ENST00000540583.5/ENSG00000178878.12, intron 2 of 3)	12
C7orf65	-2.61	1.18e-06	0.000651	ENSG00000221845.4	ENST00000408988.2	-13556	no_CPG	47640688	47641688	3.93	Distal Intergenic	7
UBE2L6	-2.61	8.73e-06	0.00263	ENSG00000156587.15	ENST00000340573.8	-709	no_CPG	57568993	57569993	3.35	Promoter (<=1kb)	11
KIAA1211L	-2.61	0.000216	0.0179	ENSG00000196872.11	ENST00000420294.1	-8210	no_CPG	98944469	98945469	3.22	Distal Intergenic	2
MIR585	-2.6	2.09e-08	3.68e-05	ENSG00000207619.1	ENST00000384887.1	98582	no_CPG	169164112	169165112	4.71	Intron (ENST00000519560.5/ENSG00000184347.14, intron 4 of 35)	5
RN7SKP226	-2.6	1.22e-06	0.000653	ENSG00000201782.1	ENST00000364912.1	-18050	no_CPG	128201454	128202454	3.83	Distal Intergenic	8
MTCO2P25	-2.6	1.42e-06	0.000703	ENSG00000230654.1	ENST00000447065.1	6902	no_CPG	69323476	69324476	4.28	Intron (ENST00000435148.1/ENSG00000225718.1, intron 1 of 2)	7
TMEM189	-2.59	1.12e-08	2.36e-05	ENSG00000240849.10	ENST00000371656.3	-7064	no_CPG	50138196	50139196	4.65	Intron (ENST00000341698.2/ENSG00000124208.16, intron 2 of 7)	20
TNRC6A	-2.59	1.44e-06	0.000704	ENSG00000090905.18	ENST00000315183.11	-11722	no_CPG	24716973	24717973	4.11	Intron (ENST00000566108.2/ENSG00000090905.18, intron 2 of 2)	16
ADORA1	-2.59	4.7e-06	0.0017	ENSG00000163485.15	ENST00000472535.1	-5248	no_CPG	203144384	203145384	4.03	Exon (ENST00000434265.2/ENSG00000224671.2, exon 3 of 4)	1
COL14A1	-2.59	1.18e-05	0.00319	ENSG00000187955.11	ENST00000537875.2	-3275	no_CPG	120103103	120104103	3.61	Intron (ENST00000498051.6/ENSG00000187955.11, intron 2 of 22)	8
RPS20P25	-2.59	2.38e-05	0.00525	ENSG00000228375.1	ENST00000412447.1	-227087	no_CPG	81182192	81183192	3.16	Distal Intergenic	9
APOBEC3H	-2.59	6.89e-05	0.00996	ENSG00000100298.15	ENST00000421988.6	0	no_CPG	39096769	39097769	3.48	Promoter (<=1kb)	22
AC104654.2	-2.59	6.92e-05	0.00998	ENSG00000234362.5	ENST00000427054.5	4105	no_CPG	41928360	41929360	3.17	Downstream (2-3kb)	2
DRAIC	-2.58	2.94e-06	0.00123	ENSG00000245750.7	ENST00000560882.5	12658	no_CPG	69480694	69481694	4.19	Intron (ENST00000558633.5/ENSG00000245750.7, intron 3 of 5)	15
C15orf54	-2.58	3.05e-06	0.00126	ENSG00000175746.6	ENST00000625107.1	-7529	no_CPG	39242155	39243155	3.59	Intron (ENST00000561058.5/ENSG00000259345.5, intron 1 of 5)	15
RP11-39E3.5	-2.58	3.42e-05	0.00663	ENSG00000251579.1	ENST00000505214.1	1934	no_CPG	130925342	130926342	3.47	Promoter (1-2kb)	3
DNAH9	-2.58	0.000325	0.0217	ENSG00000007174.17	ENST00000585197.1	1456	no_CPG	11618856	11619856	3.48	Promoter (1-2kb)	17
ACOXL	-2.57	6.2e-08	7.61e-05	ENSG00000153093.18	ENST00000433706.5	63954	no_CPG	110869273	110870273	4.38	Intron (ENST00000389811.8/ENSG00000153093.18, intron 10 of 18)	2
NTRK3	-2.57	0.0002	0.0173	ENSG00000140538.16	ENST00000560201.1	4413	no_CPG	87973390	87974390	3.01	Intron (ENST00000394480.6/ENSG00000140538.16, intron 14 of 18)	15
HSD17B3	-2.56	1.44e-08	2.81e-05	ENSG00000130948.9	ENST00000467499.5	-1278	no_CPG	96241182	96242182	4.75	Promoter (1-2kb)	9
RUNX1	-2.56	5.21e-06	0.00181	ENSG00000159216.18	ENST00000416754.1	61667	no_CPG	34986603	34987603	3.99	Intron (ENST00000437180.5/ENSG00000159216.18, intron 2 of 8)	21
LANCL1-AS1	-2.56	6.6e-06	0.00219	ENSG00000234281.5	ENST00000420418.5	41721	no_CPG	210366487	210367487	3.7	Intron (ENST00000433296.5/ENSG00000234281.5, intron 1 of 4)	2
KIAA1462	-2.55	4.52e-07	0.000307	ENSG00000165757.8	ENST00000464386.1	55423	no_CPG	29957495	29958495	4.21	Distal Intergenic	10
RP11-309M7.1	-2.55	4.9e-05	0.00824	ENSG00000261298.1	ENST00000569111.1	28318	no_CPG	234251632	234252632	3.56	Distal Intergenic	2
EPDR1	-2.55	0.000141	0.0143	ENSG00000086289.11	ENST00000425345.1	23765	no_CPG	37945085	37946085	3.7	Intron (ENST00000476620.1/ENSG00000086289.11, intron 2 of 3)	7
NCAM1	-2.55	0.000457	0.0253	ENSG00000149294.16	ENST00000528158.2	1832	no_CPG	113262013	113263013	2.99	Promoter (1-2kb)	11
LINC01591	-2.54	9.56e-07	0.00056	ENSG00000254083.5	ENST00000524070.1	1036	no_CPG	135235273	135236273	4.83	Promoter (1-2kb)	8
EPB41L5	-2.54	1.66e-05	0.00412	ENSG00000115109.13	ENST00000488691.1	-25532	no_CPG	120134035	120135035	3.43	Intron (ENST00000263713.9/ENSG00000115109.13, intron 18 of 24)	2
NIN	-2.54	1.87e-05	0.00441	ENSG00000100503.23	ENST00000389869.7	2691	no_CPG	50763104	50764104	3.79	Promoter (2-3kb)	14
GAPDHP33	-2.53	1.4e-07	0.000132	ENSG00000240244.3	ENST00000443168.1	9157	no_CPG	119587022	119588022	4.54	Distal Intergenic	1
CDYL2	-2.53	4.03e-07	0.00028	ENSG00000166446.14	ENST00000562753.1	15813	no_CPG	80718320	80719320	4.43	Intron (ENST00000570137.6/ENSG00000166446.14, intron 1 of 6)	16
RP4-778K6.3	-2.53	5.55e-06	0.00188	ENSG00000242154.1	ENST00000476569.1	0	no_CPG	105304246	105305246	4.37	Promoter (<=1kb)	7
RP5-921G16.2	-2.53	0.000156	0.0152	ENSG00000241324.1	ENST00000470677.1	0	no_CPG	124349115	124350115	2.97	Promoter (<=1kb)	7
RB1CC1	-2.52	7.42e-06	0.00233	ENSG00000023287.12	ENST00000518468.1	-77439	no_CPG	52823282	52824282	3.96	Distal Intergenic	8
AC079753.4	-2.52	9.03e-06	0.00269	ENSG00000180152.3	ENST00000312918.2	27570	no_CPG	112880898	112881898	3.77	Distal Intergenic	2
ADGRF3	-2.52	4.34e-05	0.00777	ENSG00000173567.14	ENST00000459892.5	5498	no_CPG	26339304	26340304	3.95	Intron (ENST00000442141.5/ENSG00000138018.17, intron 1 of 4)	2
MRPL13	-2.51	2.56e-07	0.000208	ENSG00000172172.7	ENST00000521648.5	9459	no_CPG	120403653	120404653	4.46	Intron (ENST00000521648.5/ENSG00000172172.7, intron 1 of 2)	8
GPR55	-2.51	4.33e-06	0.0016	ENSG00000135898.9	ENST00000392039.2	0	no_CPG	230960850	230961850	3.95	Promoter (<=1kb)	2
RP11-357N13.1	-2.51	3.08e-05	0.00622	ENSG00000261049.2	ENST00000563879.2	3326	no_CPG	54050257	54051257	3.42	Intron (ENST00000471389.5/ENSG00000140718.19, intron 8 of 8)	16
HMGCS2	-2.5	3.4e-06	0.00137	ENSG00000134240.11	ENST00000544913.2	-18717	no_CPG	119787622	119788622	4.27	Distal Intergenic	1
RNU6-1095P	-2.5	0.00043	0.0248	ENSG00000251957.1	ENST00000516148.1	-6386	no_CPG	11915795	11916795	2.75	Distal Intergenic	10
RP11-386I23.1	-2.49	1.06e-06	0.000599	ENSG00000229052.2	ENST00000418249.2	2964	no_CPG	92934309	92935309	4.69	Promoter (2-3kb)	1
5S_rRNA	-2.49	0.00031	0.0213	ENSG00000283433.1	ENST00000638107.1	-49809	no_CPG	29823250	29824250	2.94	Distal Intergenic	20
RASSF4	-2.49	0.00112	0.0357	ENSG00000107551.20	ENST00000483709.6	3105	no_CPG	44962944	44963944	3.39	Intron (ENST00000489171.5/ENSG00000107551.20, intron 1 of 9)	10
TLL2	-2.48	2.6e-07	0.000208	ENSG00000095587.8	ENST00000506028.2	-41459	no_CPG	96416820	96417820	4	Intron (ENST00000357947.3/ENSG00000095587.8, intron 7 of 20)	10
PLA2G2E	-2.48	1.56e-05	0.00394	ENSG00000188784.4	ENST00000375116.3	-1399	no_CPG	19925016	19926016	3.73	Promoter (1-2kb)	1
RAB31	-2.48	0.000221	0.0181	ENSG00000168461.12	ENST00000583921.5	5652	no_CPG	9803011	9804011	3.81	Intron (ENST00000578921.5/ENSG00000168461.12, intron 3 of 6)	18
NCK2	-2.47	3.36e-07	0.000247	ENSG00000071051.13	ENST00000233154.8	-126456	no_CPG	105617441	105618441	4.38	Distal Intergenic	2
ZNRF2P2	-2.47	0.000194	0.017	ENSG00000225264.3	ENST00000442865.1	-44245	no_CPG	29729500	29730500	3.51	Intron (ENST00000414296.2/ENSG00000227855.3, intron 16 of 18)	7
DDX18P1	-2.46	2.79e-07	0.000212	ENSG00000259165.1	ENST00000556558.1	10210	no_CPG	69093608	69094608	4.55	Intron (ENST00000341516.9/ENSG00000139990.17, intron 5 of 8)	14
FGFR1	-2.46	2.04e-05	0.0047	ENSG00000077782.19	ENST00000619564.3	-4222	no_CPG	38473056	38474056	3.59	Distal Intergenic	8
RP11-542B15.1	-2.46	9.77e-05	0.0118	ENSG00000203585.3	ENST00000538573.1	-2007	no_CPG	67516822	67517822	3.72	Promoter (2-3kb)	12
LMCD1-AS1	-2.45	2.77e-06	0.00119	ENSG00000227110.6	ENST00000446281.5	10840	no_CPG	8489758	8490758	3.98	Intron (ENST00000446281.5/ENSG00000227110.6, intron 3 of 5)	3
RP11-1028N23.3	-2.45	2.82e-06	0.0012	ENSG00000258108.1	ENST00000550378.1	-27050	no_CPG	115541614	115542614	3.9	Distal Intergenic	12
RP11-680H20.2	-2.45	4.09e-06	0.00153	ENSG00000250519.6	ENST00000506309.6	0	no_CPG	94237379	94238379	4.16	Promoter (<=1kb)	11
SNX24	-2.45	7.17e-05	0.0101	ENSG00000064652.10	ENST00000511545.5	6692	no_CPG	122852355	122853355	3.21	Intron (ENST00000513613.5/ENSG00000064652.10, intron 1 of 4)	5
RP11-575G13.3	-2.45	0.000611	0.0279	ENSG00000271177.1	ENST00000605098.1	-13459	no_CPG	100538879	100539879	2.92	Intron (ENST00000548884.5/ENSG00000012504.13, intron 8 of 10)	12
SH3TC2	-2.44	4.72e-05	0.00806	ENSG00000169247.11	ENST00000510350.1	0	no_CPG	149006788	149007788	4.07	Promoter (<=1kb)	5
TUBA1C	-2.44	6.5e-05	0.00974	ENSG00000167553.14	ENST00000550574.1	6082	no_CPG	49214628	49215628	3.99	Intron (ENST00000550574.1/ENSG00000167553.14, intron 1 of 2)	12
CTA-243E7.4	-2.44	0.000103	0.0121	ENSG00000279085.1	ENST00000623888.1	6870	no_CPG	25007202	25008202	4.07	Intron (ENST00000406486.8/ENSG00000197077.13, intron 1 of 13)	22
FAM186A	-2.44	0.000895	0.0324	ENSG00000185958.9	ENST00000543111.5	0	no_CPG	50396162	50397162	3.61	Promoter (<=1kb)	12
NPBWR1	-2.43	1.73e-08	3.14e-05	ENSG00000183729.3	ENST00000331251.3	-40330	no_CPG	52897101	52898101	4.88	Distal Intergenic	8
TSNARE1	-2.43	0.000257	0.0195	ENSG00000171045.14	ENST00000518928.1	-12796	no_CPG	142339021	142340021	3.78	Intron (ENST00000524325.5/ENSG00000171045.14, intron 4 of 13)	8
MAN1A1	-2.42	4.2e-06	0.00156	ENSG00000111885.6	ENST00000368468.3	-190997	no_CPG	119540758	119541758	4.41	Distal Intergenic	6
RP11-321A17.4	-2.42	1.32e-05	0.00344	ENSG00000263709.1	ENST00000582196.1	10597	no_CPG	29151080	29152080	4.2	Intron (ENST00000582196.1/ENSG00000263709.1, intron 1 of 1)	17
LINC00844	-2.42	0.000157	0.0152	ENSG00000237949.1	ENST00000432535.1	-35108	no_CPG	58963518	58964518	4.53	Distal Intergenic	10
IFI35	-2.42	0.000313	0.0213	ENSG00000068079.7	ENST00000538473.1	-580	no_CPG	43010481	43011481	3.05	Promoter (<=1kb)	17
CTA-390C10.10	-2.41	3.45e-06	0.00137	ENSG00000272977.1	ENST00000609475.1	0	no_CPG	25475341	25476341	4.82	Promoter (<=1kb)	22
MIR4654	-2.41	8.26e-06	0.00253	ENSG00000266144.1	ENST00000577581.1	56165	no_CPG	162213272	162214272	3.86	Intron (ENST00000530878.5/ENSG00000198929.12, intron 2 of 9)	1
RP11-46E17.6	-2.41	1.08e-05	0.00306	ENSG00000227880.1	ENST00000440477.1	-46886	no_CPG	27506946	27507946	3.96	Distal Intergenic	22
RMI2	-2.4	1.39e-06	0.000696	ENSG00000175643.8	ENST00000572992.1	-2480	no_CPG	11309420	11310420	3.75	Promoter (2-3kb)	16
RNU7-95P	-2.4	0.000113	0.0128	ENSG00000239007.1	ENST00000459222.1	48844	no_CPG	53638968	53639968	3.16	Intron (ENST00000312233.4/ENSG00000174332.5, intron 1 of 9)	1
ZDHHC11	-2.4	0.000519	0.0262	ENSG00000188818.12	ENST00000505815.1	-729	no_CPG	844475	845475	2.63	Promoter (<=1kb)	5
AF015262.2	-2.39	9.4e-06	0.00275	ENSG00000234703.1	ENST00000455028.1	157602	no_CPG	35294240	35295240	3.75	Intron (ENST00000475045.6/ENSG00000159216.18, intron 9 of 12)	21
TRMT112P3	-2.39	1.23e-05	0.00329	ENSG00000265262.1	ENST00000580149.1	423	no_CPG	62949765	62950765	4.66	Promoter (<=1kb)	17
AC012065.4	-2.38	1.29e-05	0.00339	ENSG00000227047.1	ENST00000441870.1	8593	no_CPG	20491718	20492718	4.09	Distal Intergenic	2
RP5-1172A22.1	-2.38	2.61e-05	0.00552	ENSG00000233521.5	ENST00000418271.1	8076	no_CPG	27215581	27216581	3.65	Distal Intergenic	22
RPS2P48	-2.38	2.97e-05	0.00609	ENSG00000233380.1	ENST00000441047.1	7995	no_CPG	53748875	53749875	3.75	Distal Intergenic	17
Metazoa_SRP	-2.38	6.04e-05	0.00923	ENSG00000278109.1	ENST00000616636.1	7195	no_CPG	43599528	43600528	3.55	Intron (ENST00000588996.1/ENSG00000267747.1, intron 2 of 2)	17
RPS3	-2.38	7.12e-05	0.0101	ENSG00000149273.14	ENST00000531188.5	-14345	no_CPG	75384141	75385141	3.73	Distal Intergenic	11
RPL17P45	-2.38	0.000243	0.019	ENSG00000267664.1	ENST00000586289.1	-7937	no_CPG	40152441	40153441	3.01	Distal Intergenic	18
OR7E47P	-2.38	0.000663	0.029	ENSG00000272724.1	ENST00000575924.1	-676	no_CPG	52083068	52084068	3.15	Promoter (<=1kb)	12
RP11-861A13.3	-2.37	7.07e-06	0.00229	ENSG00000279277.1	ENST00000624541.1	67898	no_CPG	107969547	107970547	3.73	Distal Intergenic	3
RP11-432M8.10	-2.37	9.53e-06	0.00278	ENSG00000250351.1	ENST00000511694.1	982	no_CPG	17618957	17619957	3.73	Promoter (<=1kb)	5
BAHCC1	-2.37	2.71e-05	0.0057	ENSG00000266074.8	ENST00000625166.1	4038	no_CPG	81405128	81406128	3.74	Intron (ENST00000584436.7/ENSG00000266074.8, intron 2 of 28)	17
CLDN23	-2.37	2.92e-05	0.00605	ENSG00000253958.1	ENST00000519106.1	-55943	no_CPG	8644995	8645995	4	Distal Intergenic	8
RP11-526P6.1	-2.37	0.000118	0.013	ENSG00000256022.5	ENST00000546180.1	-13961	no_CPG	127650428	127651428	4.01	Distal Intergenic	12
RASGEF1A	-2.37	0.000533	0.0265	ENSG00000198915.11	ENST00000395810.5	15848	no_CPG	43250071	43251071	3.16	Intron (ENST00000395810.5/ENSG00000198915.11, intron 1 of 12)	10
TMCC1-AS1	-2.36	1.73e-05	0.00421	ENSG00000271270.5	ENST00000604747.1	6277	no_CPG	129908128	129909128	3.63	Exon (ENST00000605830.5/ENSG00000271270.5, exon 3 of 3)	3
RP11-88G17.6	-2.36	4.35e-05	0.00777	ENSG00000196979.1	ENST00000358748.1	0	no_CPG	130143700	130144700	3.27	Promoter (<=1kb)	9
DST	-2.36	6.87e-05	0.00996	ENSG00000151914.19	ENST00000522538.5	-16330	no_CPG	56802209	56803209	4.47	Intron (ENST00000421834.6/ENSG00000151914.19, intron 1 of 93)	6
AC005550.3	-2.36	0.00011	0.0126	ENSG00000237070.1	ENST00000451240.1	-24031	no_CPG	15642916	15643916	3.92	Intron (ENST00000262041.5/ENSG00000106511.5, intron 1 of 2)	7
RP11-348A7.1	-2.35	1.04e-07	0.000104	ENSG00000228940.1	ENST00000413739.1	19659	no_CPG	40919104	40920104	4.76	Distal Intergenic	1
AEBP2	-2.35	2.11e-05	0.00481	ENSG00000139154.14	ENST00000538425.5	-349	no_CPG	19402696	19403696	4.28	Promoter (<=1kb)	12
FNBP1L	-2.35	6.83e-05	0.00996	ENSG00000137942.16	ENST00000603526.1	8906	no_CPG	93552732	93553732	3.82	3' UTR	1
RP11-781M16.1	-2.35	7.94e-05	0.0107	ENSG00000248387.1	ENST00000510606.1	14419	no_CPG	158484005	158485005	3.27	Intron (ENST00000460056.6/ENSG00000171509.15, intron 2 of 19)	4
RPA2P3	-2.35	9.84e-05	0.0118	ENSG00000255547.1	ENST00000533268.1	108037	no_CPG	100444893	100445893	3.4	Distal Intergenic	11
SOX6	-2.35	0.000355	0.0226	ENSG00000110693.16	ENST00000524650.1	-36187	no_CPG	16148056	16149056	2.97	Intron (ENST00000316399.10/ENSG00000110693.16, intron 5 of 14)	11
RP11-10A14.8	-2.34	3.81e-06	0.00147	ENSG00000254091.2	ENST00000522241.2	-7335	no_CPG	9224678	9225678	4.75	Distal Intergenic	8
ABCB9	-2.34	4.1e-06	0.00153	ENSG00000150967.17	ENST00000426173.6	929	no_CPG	122957858	122958858	4.12	Promoter (<=1kb)	12
SPARC	-2.34	7.83e-06	0.00244	ENSG00000113140.10	ENST00000231061.8	-6672	no_CPG	151693837	151694837	5.01	Intron (ENST00000518905.1/ENSG00000249035.6, intron 2 of 2)	5
RNA5SP41	-2.34	1.13e-05	0.00315	ENSG00000222952.1	ENST00000411020.1	-5040	no_CPG	13628324	13629324	4.2	Distal Intergenic	1
BTNL9	-2.34	8.01e-05	0.0107	ENSG00000165810.16	ENST00000376841.6	-3237	no_CPG	181035988	181036988	3.25	Distal Intergenic	5
FRMD5	-2.34	9.49e-05	0.0117	ENSG00000171877.20	ENST00000479319.1	-970	no_CPG	43910897	43911897	3.51	Promoter (<=1kb)	15
CTD-2015G9.2	-2.34	0.000169	0.0157	ENSG00000261175.5	ENST00000562064.1	86957	no_CPG	86809049	86810049	3.62	Distal Intergenic	16
AL137164.1	-2.34	0.00125	0.0371	ENSG00000281282.1	ENST00000626267.1	13517	no_CPG	24982330	24983330	3.27	Intron (ENST00000396700.5/ENSG00000168952.15, intron 2 of 6)	14
BASP1	-2.33	6.99e-08	8.17e-05	ENSG00000176788.8	ENST00000606445.1	4093	no_CPG	17069691	17070691	4.97	Intron (ENST00000606445.1/ENSG00000176788.8, intron 1 of 3)	5
AC079988.3	-2.33	1.56e-07	0.000145	ENSG00000236145.1	ENST00000432984.1	7046	no_CPG	121185373	121186373	5.44	Distal Intergenic	2
RNA5SP40	-2.33	5.51e-07	0.00036	ENSG00000252956.1	ENST00000517147.1	-509	no_CPG	9438287	9439287	4.44	Promoter (<=1kb)	1
RNU1-55P	-2.33	3.92e-05	0.00733	ENSG00000202380.1	ENST00000365510.1	-53721	no_CPG	5835334	5836334	3.79	Intron (ENST00000303142.10/ENSG00000171984.14, intron 2 of 2)	20
RPL36AP29	-2.33	5.65e-05	0.00889	ENSG00000224683.1	ENST00000415878.1	-146057	no_CPG	16061888	16062888	3.81	Distal Intergenic	7
RN7SL571P	-2.33	8.61e-05	0.0112	ENSG00000243274.3	ENST00000468302.3	245217	no_CPG	76380148	76381148	4.27	Distal Intergenic	13
NFIA-AS1	-2.33	0.000584	0.0274	ENSG00000237853.6	ENST00000596404.1	-30382	no_CPG	61283892	61284892	2.97	Intron (ENST00000371191.5/ENSG00000162599.15, intron 3 of 10)	1
GRIN2B	-2.32	5.95e-05	0.00916	ENSG00000273079.5	ENST00000637875.1	28852	no_CPG	13950131	13951131	3.97	Intron (ENST00000609686.3/ENSG00000273079.5, intron 1 of 12)	12
BRINP2	-2.32	0.000184	0.0165	ENSG00000198797.6	ENST00000478325.1	25779	no_CPG	177282639	177283639	3.25	Distal Intergenic	1
S100B	-2.32	0.000411	0.0243	ENSG00000160307.9	ENST00000367071.4	-11827	no_CPG	46617035	46618035	3.11	Distal Intergenic	21
RP11-112N19.2	-2.31	2e-05	0.00463	ENSG00000240238.1	ENST00000472975.1	-571	no_CPG	59553664	59554664	4.03	Promoter (<=1kb)	15
CRNN	-2.31	8.67e-05	0.0112	ENSG00000143536.7	ENST00000271835.3	-28279	no_CPG	152442542	152443542	3.09	Intron (ENST00000411804.1/ENSG00000237975.6, intron 1 of 1)	1
RP11-85G21.1	-2.31	0.000156	0.0152	ENSG00000228239.1	ENST00000449345.1	-15060	no_CPG	157252196	157253196	3.88	Distal Intergenic	1
RP11-711K1.7	-2.31	0.000172	0.0158	ENSG00000255790.5	ENST00000539178.5	-9662	no_CPG	11445982	11446982	3.6	Intron (ENST00000545829.1/ENSG00000121335.11, intron 1 of 2)	12
RP11-723G8.1	-2.31	0.00071	0.0294	ENSG00000260457.2	ENST00000563639.2	-5251	no_CPG	71830788	71831788	2.96	Distal Intergenic	18
AC008271.1	-2.3	5.13e-08	6.97e-05	ENSG00000231031.6	ENST00000476839.2	29647	no_CPG	15730178	15731178	4.94	Intron (ENST00000436967.4/ENSG00000231031.6, intron 2 of 3)	2
CUX1	-2.3	0.000111	0.0127	ENSG00000257923.9	ENST00000465461.6	-58382	no_CPG	102044971	102045971	4.17	Intron (ENST00000437600.8/ENSG00000257923.9, intron 3 of 22)	7
RP11-789C7.1	-2.3	0.000122	0.0133	ENSG00000278933.1	ENST00000624990.1	24765	no_CPG	43523938	43524938	3.48	Distal Intergenic	18
SNX13	-2.3	0.000146	0.0146	ENSG00000071189.21	ENST00000496855.1	39087	no_CPG	17781610	17782610	3.36	Distal Intergenic	7
FAM86JP	-2.3	0.000411	0.0243	ENSG00000171084.15	ENST00000485843.1	6312	no_CPG	125922942	125923942	3.1	Exon (ENST00000484500.5/ENSG00000171084.15, exon 5 of 8)	3
RHBDD2	-2.29	1.18e-05	0.00319	ENSG00000005486.16	ENST00000468644.5	-7558	no_CPG	75869533	75870533	4.29	Intron (ENST00000466232.5/ENSG00000005486.16, intron 1 of 2)	7
RN7SL757P	-2.29	4.07e-05	0.00748	ENSG00000239249.3	ENST00000466709.3	20992	no_CPG	28034461	28035461	4.29	Intron (ENST00000612946.4/ENSG00000100154.14, intron 10 of 20)	22
RAPGEF6	-2.29	6.69e-05	0.00986	ENSG00000158987.20	ENST00000308008.10	19250	no_CPG	131614780	131615780	3.68	Intron (ENST00000509018.5/ENSG00000158987.20, intron 1 of 27)	5
RP11-21M7.2	-2.29	6.98e-05	0.01	ENSG00000270575.1	ENST00000605307.1	-67068	no_CPG	178261777	178262777	3.86	Intron (ENST00000367649.7/ENSG00000075391.16, intron 1 of 17)	1
RPF2P2	-2.29	0.000414	0.0244	ENSG00000250693.2	ENST00000504693.2	42421	no_CPG	115671233	115672233	3.76	Distal Intergenic	4
RUNX1	-2.29	0.000772	0.0305	ENSG00000159216.18	ENST00000494829.1	36162	no_CPG	35428167	35429167	3.58	Intron (ENST00000475045.6/ENSG00000159216.18, intron 9 of 12)	21
SLC6A18	-2.28	1.17e-05	0.00319	ENSG00000164363.9	ENST00000513607.2	1926	no_CPG	1227335	1228335	4.35	Promoter (1-2kb)	5
FUS	-2.28	2.48e-05	0.00541	ENSG00000089280.18	ENST00000254108.11	-2222	no_CPG	31176888	31177888	3.66	Promoter (2-3kb)	16
RP1-60O19.1	-2.28	3.14e-05	0.00627	ENSG00000235142.7	ENST00000606430.1	-32698	no_CPG	106820239	106821239	3.75	Distal Intergenic	6
RP11-380J14.1	-2.28	3.7e-05	0.0071	ENSG00000204362.6	ENST00000412427.1	-33702	no_CPG	17155081	17156081	3.76	Distal Intergenic	1
KRASP1	-2.28	0.000293	0.0209	ENSG00000220635.2	ENST00000407852.2	-51997	no_CPG	54717586	54718586	3.46	Distal Intergenic	6
RPL35P5	-2.28	0.000478	0.0254	ENSG00000225573.4	ENST00000433398.1	10247	no_CPG	66595860	66596860	3.35	Distal Intergenic	7
CTA-390C10.10	-2.27	5.86e-09	1.58e-05	ENSG00000272977.1	ENST00000609475.1	11694	no_CPG	25487912	25488912	5.2	Intron (ENST00000354451.6/ENSG00000100058.12, intron 3 of 5)	22
RP4-666F24.3	-2.27	3.44e-06	0.00137	ENSG00000233730.1	ENST00000448680.1	33432	no_CPG	115133104	115134104	4.25	Distal Intergenic	1
SOX5	-2.27	1.76e-05	0.00421	ENSG00000134532.15	ENST00000546136.5	0	no_CPG	23895471	23896471	3.98	Promoter (<=1kb)	12
TUBB4BP4	-2.27	7.31e-05	0.0103	ENSG00000254961.1	ENST00000527023.1	27399	no_CPG	91921635	91922635	3.67	Distal Intergenic	11
MFSD2A	-2.26	5.53e-07	0.00036	ENSG00000168389.17	ENST00000420632.6	-1694	no_CPG	39952418	39953418	4.64	Promoter (1-2kb)	1
DIRC3	-2.26	6.73e-07	0.000428	ENSG00000231672.6	ENST00000484635.1	45617	no_CPG	217387599	217388599	4.31	Intron (ENST00000474063.5/ENSG00000231672.6, intron 7 of 11)	2
RP11-46E17.6	-2.26	2.51e-05	0.00545	ENSG00000227880.1	ENST00000440477.1	-20214	no_CPG	27480274	27481274	5.23	Distal Intergenic	22
RPS4XP19	-2.26	4.94e-05	0.00827	ENSG00000242058.2	ENST00000460237.2	-20466	no_CPG	8998563	8999563	4.33	Distal Intergenic	18
RP11-846C15.2	-2.26	0.000158	0.0153	ENSG00000267101.5	ENST00000587276.1	14068	no_CPG	45166046	45167046	3.99	Intron (ENST00000589845.5/ENSG00000267101.5, intron 2 of 3)	18
TMPRSS5	-2.25	6.56e-07	0.000422	ENSG00000166682.10	ENST00000545265.5	18029	no_CPG	113674708	113675708	4.63	Distal Intergenic	11
LGR6	-2.25	5.68e-05	0.0089	ENSG00000133067.17	ENST00000423542.5	-2692	no_CPG	202207016	202208016	3.82	Promoter (2-3kb)	1
TRAF5	-2.25	0.000131	0.0137	ENSG00000082512.14	ENST00000473385.1	2331	no_CPG	211371260	211372260	3.64	Promoter (2-3kb)	1
RASD2	-2.25	0.00031	0.0213	ENSG00000100302.6	ENST00000216127.4	18431	no_CPG	35559299	35560299	3.44	Distal Intergenic	22
IGLL1	-2.25	0.000354	0.0225	ENSG00000128322.6	ENST00000249053.3	195	no_CPG	23579044	23580044	3.63	Promoter (<=1kb)	22
RP5-1195D24.1	-2.24	1.67e-06	0.000788	ENSG00000236985.1	ENST00000422574.1	53220	no_CPG	16809928	16810928	4.1	Distal Intergenic	20
LPCAT2	-2.24	1.16e-05	0.00319	ENSG00000087253.12	ENST00000566375.1	3005	no_CPG	55552311	55553311	4.12	Intron (ENST00000262134.9/ENSG00000087253.12, intron 11 of 13)	16
RP1-90J4.2	-2.24	1.43e-05	0.00367	ENSG00000258369.1	ENST00000549509.1	-4217	no_CPG	47457870	47458870	3.97	Distal Intergenic	12
CTD-2325B11.1	-2.24	0.000217	0.0179	ENSG00000249837.1	ENST00000507299.1	44094	no_CPG	124206950	124207950	3.53	Intron (ENST00000507299.1/ENSG00000249837.1, intron 3 of 4)	4
RP11-806L2.6	-2.23	2.46e-06	0.00108	ENSG00000265490.1	ENST00000580007.1	-5651	no_CPG	699872	700872	4.09	Intron (ENST00000383578.7/ENSG00000132199.18, intron 2 of 15)	18
SFRP2	-2.23	1.73e-05	0.00421	ENSG00000145423.4	ENST00000274063.4	-161209	no_CPG	153950329	153951329	4.03	Distal Intergenic	4
RNU7-190P	-2.23	0.000128	0.0136	ENSG00000239185.1	ENST00000459241.1	10647	no_CPG	117128128	117129128	3.81	Distal Intergenic	2
FAM49B	-2.23	0.000229	0.0183	ENSG00000153310.18	ENST00000523993.5	-15837	no_CPG	130032966	130033966	3.62	Distal Intergenic	8
TMEM266	-2.23	0.000664	0.029	ENSG00000169758.12	ENST00000558249.1	14795	no_CPG	76206264	76207264	3.18	Intron (ENST00000561302.5/ENSG00000169758.12, intron 10 of 10)	15
LRRFIP2	-2.23	0.000941	0.033	ENSG00000093167.17	ENST00000460646.5	10190	no_CPG	37054144	37055144	3.05	Exon (ENST00000354379.8/ENSG00000093167.17, exon 12 of 14)	3
SLC14A2	-2.23	0.00129	0.0374	ENSG00000132874.14	ENST00000323329.3	1485	no_CPG	45616966	45617966	3.03	Promoter (1-2kb)	18
NELFCD	-2.23	0.00201	0.0447	ENSG00000101158.13	ENST00000602795.5	-24232	no_CPG	58955976	58956976	2.73	Distal Intergenic	20
HMGB1P29	-2.22	1.81e-05	0.0043	ENSG00000250862.1	ENST00000505659.1	163281	no_CPG	124056796	124057796	3.87	Downstream (1-2kb)	5
Metazoa_SRP	-2.22	0.000129	0.0136	ENSG00000276764.1	ENST00000622625.1	-10233	no_CPG	18968646	18969646	3.51	Intron (ENST00000504827.1/ENSG00000249174.1, intron 1 of 1)	5
ANKS1B	-2.22	0.000296	0.0209	ENSG00000185046.18	ENST00000549315.1	11426	no_CPG	98768786	98769786	3.03	Intron (ENST00000341752.11/ENSG00000185046.18, intron 8 of 9)	12
SMCP	-2.22	0.000406	0.0241	ENSG00000163206.5	ENST00000368765.3	6309	no_CPG	152884626	152885626	3.03	3' UTR	1
RP11-3L21.2	-2.22	0.00108	0.0353	ENSG00000229400.1	ENST00000431691.1	-5804	no_CPG	224736466	224737466	3.3	Intron (ENST00000498382.5/ENSG00000143786.7, intron 5 of 5)	1
NDUFAF5	-2.22	0.00135	0.038	ENSG00000101247.17	ENST00000487478.5	-52	no_CPG	13800491	13801491	3.17	Promoter (<=1kb)	20
KMO	-2.21	7.43e-06	0.00233	ENSG00000117009.11	ENST00000366555.5	14019	no_CPG	241582654	241583654	4.77	Intron (ENST00000366558.7/ENSG00000117009.11, intron 10 of 14)	1
MIR585	-2.21	1.91e-05	0.00445	ENSG00000207619.1	ENST00000384887.1	88047	no_CPG	169174647	169175647	3.76	Intron (ENST00000519560.5/ENSG00000184347.14, intron 4 of 35)	5
GRIK4	-2.21	3.86e-05	0.00731	ENSG00000149403.11	ENST00000438375.2	-23731	no_CPG	120539703	120540703	3.26	Intron (ENST00000527524.6/ENSG00000149403.11, intron 1 of 20)	11
LINC01140	-2.21	5.08e-05	0.00837	ENSG00000267272.5	ENST00000469312.6	-13591	no_CPG	87115174	87116174	4.02	Intron (ENST00000370548.3/ENSG00000267561.2, intron 6 of 7)	1
RP11-325D15.2	-2.21	6.18e-05	0.00939	ENSG00000269256.1	ENST00000597938.1	1245	no_CPG	76558749	76559749	3.79	Promoter (1-2kb)	10
RBM47	-2.21	0.000222	0.0181	ENSG00000163694.14	ENST00000511598.5	-54044	no_CPG	40684919	40685919	3.71	Distal Intergenic	4
NIFKP2	-2.21	0.0022	0.046	ENSG00000251122.1	ENST00000513462.1	-26857	no_CPG	174895233	174896233	2.51	Distal Intergenic	5
EEF1DP3	-2.2	0.000202	0.0174	ENSG00000229715.4	ENST00000428783.1	-21205	no_CPG	31824636	31825636	3.5	Distal Intergenic	13
AC092657.2	-2.2	0.000289	0.0208	ENSG00000237760.1	ENST00000436266.1	19122	no_CPG	46321242	46322242	4.09	Intron (ENST00000436266.1/ENSG00000237760.1, intron 1 of 1)	7
LINC01521	-2.2	0.000527	0.0264	ENSG00000213888.3	ENST00000614284.1	3251	no_CPG	31350137	31351137	3.7	Distal Intergenic	22
RP11-476M19.3	-2.19	1.1e-05	0.00311	ENSG00000256691.1	ENST00000546078.1	-30	no_CPG	3463616	3464616	4.68	Promoter (<=1kb)	12
CTD-2015G9.2	-2.19	0.000127	0.0136	ENSG00000261175.5	ENST00000562064.1	28656	no_CPG	86750748	86751748	3.78	Distal Intergenic	16
RP11-381I15.1	-2.19	0.00177	0.0423	ENSG00000253407.1	ENST00000521490.1	-35283	no_CPG	131180164	131181164	3.15	Distal Intergenic	8
CNP	-2.19	0.00184	0.0429	ENSG00000173786.16	ENST00000393892.7	-2960	no_CPG	41962781	41963781	3.15	Promoter (2-3kb)	17
RP11-89N17.1	-2.18	1.18e-06	0.000651	ENSG00000173862.3	ENST00000311067.3	-2872	no_CPG	33722109	33723109	4.84	Promoter (2-3kb)	7
Y_RNA	-2.18	5.12e-06	0.00179	ENSG00000201584.1	ENST00000364714.1	1203	no_CPG	121038507	121039507	4.06	Promoter (1-2kb)	2
MIR3123	-2.18	8.54e-06	0.0026	ENSG00000265831.1	ENST00000583417.1	48967	no_CPG	241181239	241182239	4.31	Intron (ENST00000348120.6/ENSG00000182901.16, intron 1 of 14)	1
ITGB8	-2.18	9.5e-05	0.0117	ENSG00000105855.9	ENST00000460204.1	8544	no_CPG	20340521	20341521	4.33	Intron (ENST00000537992.5/ENSG00000105855.9, intron 2 of 14)	7
VWCE	-2.18	0.000158	0.0153	ENSG00000167992.12	ENST00000335613.9	-1826	no_CPG	61297250	61298250	3.77	Promoter (1-2kb)	11
RP11-211G23.1	-2.18	0.000592	0.0275	ENSG00000259854.1	ENST00000562341.1	-10179	no_CPG	69403128	69404128	3.25	Distal Intergenic	11
ST3GAL1	-2.17	1.03e-06	0.000591	ENSG00000008513.14	ENST00000519435.5	11711	no_CPG	133557668	133558668	4.71	Intron (ENST00000399640.3/ENSG00000008513.14, intron 1 of 9)	8
SH3BP5	-2.17	6.15e-05	0.00937	ENSG00000131370.15	ENST00000459627.1	14778	no_CPG	15316285	15317285	3.67	Intron (ENST00000383791.7/ENSG00000131370.15, intron 2 of 8)	3
MAP3K8	-2.17	6.86e-05	0.00996	ENSG00000107968.9	ENST00000430603.1	24437	no_CPG	30463614	30464614	3.84	Distal Intergenic	10
RN7SL757P	-2.17	7.91e-05	0.0107	ENSG00000239249.3	ENST00000466709.3	26479	no_CPG	28028974	28029974	3.99	3' UTR	22
STEAP4	-2.17	0.000225	0.0182	ENSG00000127954.12	ENST00000414498.1	3652	no_CPG	88302228	88303228	4.47	Intron (ENST00000631117.2/ENSG00000228113.7, intron 4 of 4)	7
LINC01213	-2.17	0.000746	0.03	ENSG00000244541.5	ENST00000472890.5	-4791	no_CPG	150232728	150233728	2.99	Distal Intergenic	3
RP5-837M10.1	-2.16	0.000167	0.0157	ENSG00000215871.2	ENST00000401024.2	18597	no_CPG	100313020	100314020	3.66	Distal Intergenic	1
OFCC1	-2.16	0.000379	0.0233	ENSG00000181355.20	ENST00000469421.5	66061	no_CPG	9532732	9533732	3.99	Distal Intergenic	6
FER1L6-AS1	-2.15	4.73e-06	0.0017	ENSG00000181171.5	ENST00000518567.1	-120	no_CPG	124040902	124041902	4.29	Promoter (<=1kb)	8
RP5-1186P10.2	-2.15	1.57e-05	0.00394	ENSG00000273069.1	ENST00000608433.1	5013	no_CPG	74611926	74612926	3.89	Distal Intergenic	7
DNAJC5B	-2.15	5.89e-05	0.00913	ENSG00000147570.9	ENST00000519330.1	4578	no_CPG	66026192	66027192	4.04	Intron (ENST00000524076.5/ENSG00000147570.9, intron 1 of 3)	8
CTD-2247C11.2	-2.15	5.96e-05	0.00916	ENSG00000251506.1	ENST00000511721.1	-3203	no_CPG	4973628	4974628	3.81	Downstream (<1kb)	5
AC012065.5	-2.15	0.000272	0.0202	ENSG00000233416.1	ENST00000421295.1	-2349	no_CPG	20609003	20610003	3.55	Promoter (2-3kb)	2
RNU6-358P	-2.15	0.000307	0.0213	ENSG00000252373.1	ENST00000516564.1	10913	no_CPG	31808725	31809725	3.74	Intron (ENST00000438447.1/ENSG00000133401.15, intron 2 of 24)	5
FHL2	-2.14	1.39e-05	0.00358	ENSG00000115641.18	ENST00000409177.5	-17839	no_CPG	105417506	105418506	4.73	Intron (ENST00000393352.7/ENSG00000115641.18, intron 1 of 5)	2
SLC39A12-AS1	-2.14	7.55e-05	0.0104	ENSG00000226083.5	ENST00000445287.1	22520	no_CPG	17983750	17984750	4.69	Intron (ENST00000377369.6/ENSG00000148482.11, intron 6 of 12)	10
MIR802	-2.14	8.35e-05	0.011	ENSG00000211590.1	ENST00000390235.1	-55329	no_CPG	35664386	35665386	4.04	Intron (ENST00000475045.6/ENSG00000159216.18, intron 6 of 12)	21
AC012065.5	-2.14	9.63e-05	0.0118	ENSG00000233416.1	ENST00000421295.1	-7048	no_CPG	20613702	20614702	4.1	Intron (ENST00000446825.1/ENSG00000118960.12, intron 5 of 5)	2
GALNT15	-2.14	0.000197	0.0172	ENSG00000131386.17	ENST00000339732.9	-94488	no_CPG	16079161	16080161	4.1	Distal Intergenic	3
RP11-231P20.6	-2.14	0.000248	0.0192	ENSG00000278572.1	ENST00000622820.1	0	no_CPG	26219942	26220942	3.21	Promoter (<=1kb)	1
AOC1	-2.14	0.00108	0.0353	ENSG00000002726.20	ENST00000480582.1	45407	no_CPG	150903340	150904340	2.94	Distal Intergenic	7
KCTD14	-2.13	1.64e-07	0.000149	ENSG00000151364.16	ENST00000353172.5	-6822	no_CPG	78030116	78031116	5.05	Intron (ENST00000533144.1/ENSG00000151364.16, intron 2 of 2)	11
AC004540.5	-2.13	0.000115	0.0128	ENSG00000214870.8	ENST00000448056.1	8972	no_CPG	26449231	26450231	3.79	Intron (ENST00000439120.1/ENSG00000214870.8, intron 1 of 1)	7
RP11-148B3.1	-2.13	0.000902	0.0326	ENSG00000258018.1	ENST00000552992.1	-24392	no_CPG	116492466	116493466	3.1	Distal Intergenic	12
C6orf223	-2.12	2.42e-06	0.00107	ENSG00000181577.15	ENST00000442114.6	-56095	no_CPG	43943485	43944485	4.42	Distal Intergenic	6
RP11-570H19.2	-2.12	7.19e-06	0.00229	ENSG00000227167.1	ENST00000443359.1	101025	no_CPG	18260195	18261195	4.36	Intron (ENST00000636209.1/ENSG00000178031.16, intron 2 of 3)	9
MMD2	-2.12	0.000403	0.0241	ENSG00000136297.14	ENST00000406755.5	12143	no_CPG	4946048	4947048	3.54	Intron (ENST00000406755.5/ENSG00000136297.14, intron 1 of 7)	7
DENND1B	-2.12	0.000491	0.0257	ENSG00000213047.11	ENST00000477581.1	-23281	no_CPG	197798977	197799977	3.54	Distal Intergenic	1
RNU6-1340P	-2.12	0.000731	0.0298	ENSG00000207167.1	ENST00000384438.1	-9696	no_CPG	19001461	19002461	3.34	Intron (ENST00000569532.5/ENSG00000170537.12, intron 1 of 14)	16
RNA5SP300	-2.12	0.00181	0.0427	ENSG00000212499.1	ENST00000391197.1	54744	no_CPG	12869041	12870041	3.09	Distal Intergenic	10
RPS3AP46	-2.12	0.00217	0.0459	ENSG00000226132.1	ENST00000448352.1	-3607	no_CPG	53608117	53609117	3.09	Intron (ENST00000456100.5/ENSG00000237356.5, intron 3 of 3)	14
OR7E2P	-2.12	0.0023	0.047	ENSG00000255203.1	ENST00000533071.1	-11863	no_CPG	86869810	86870810	2.8	Intron (ENST00000532234.5/ENSG00000150687.11, intron 2 of 4)	11
MIR3161	-2.11	5.01e-06	0.00177	ENSG00000263693.1	ENST00000577977.1	7160	no_CPG	48103942	48104942	4.12	Intron (ENST00000613246.4/ENSG00000149177.12, intron 1 of 24)	11
STX8P1	-2.11	5.9e-05	0.00913	ENSG00000270296.1	ENST00000603161.1	-4119	no_CPG	12775824	12776824	4.21	Intron (ENST00000540583.5/ENSG00000178878.12, intron 2 of 3)	12
CTA-392C11.1	-2.11	7.98e-05	0.0107	ENSG00000253802.1	ENST00000522486.1	-6282	no_CPG	40349684	40350684	3.79	Distal Intergenic	8
CTD-2003C8.2	-2.11	0.000451	0.0253	ENSG00000250041.2	ENST00000503469.2	-8571	no_CPG	10907893	10908893	3.62	Distal Intergenic	11
ATP2C2	-2.11	0.000587	0.0274	ENSG00000064270.12	ENST00000565631.5	-7131	no_CPG	84396296	84397296	3.86	Intron (ENST00000262429.8/ENSG00000064270.12, intron 1 of 26)	16
IGF2BP2	-2.11	0.00241	0.0479	ENSG00000073792.15	ENST00000466214.1	12874	no_CPG	185807229	185808229	2.8	Intron (ENST00000382199.6/ENSG00000073792.15, intron 2 of 15)	3
RPS6KA2	-2.1	3.79e-06	0.00147	ENSG00000071242.11	ENST00000481261.6	-11828	no_CPG	166556518	166557518	4.86	Intron (ENST00000265678.8/ENSG00000071242.11, intron 1 of 20)	6
RNU7-186P	-2.1	8.08e-05	0.0107	ENSG00000238419.1	ENST00000458818.1	-7623	no_CPG	47267043	47268043	4.2	Intron (ENST00000559488.5/ENSG00000259207.7, intron 1 of 14)	17
IGFL1P1	-2.1	0.000226	0.0182	ENSG00000268879.1	ENST00000599950.1	2193	no_CPG	46198431	46199431	3.7	Promoter (2-3kb)	19
IGFBP7-AS1	-2.1	0.000336	0.0221	ENSG00000245067.6	ENST00000515865.1	11613	no_CPG	57190758	57191758	4.26	Intron (ENST00000499667.6/ENSG00000245067.6, intron 2 of 4)	4
RP11-317P15.6	-2.1	0.00158	0.0404	ENSG00000271269.1	ENST00000603149.1	18116	no_CPG	182751908	182752908	3.62	Distal Intergenic	1
PLCB4	-2.09	1.11e-05	0.00312	ENSG00000101333.16	ENST00000414679.6	-5380	no_CPG	9301420	9302420	4.19	Intron (ENST00000407043.6/ENSG00000101333.16, intron 3 of 6)	20
RP11-214N16.2	-2.09	2.37e-05	0.00525	ENSG00000219149.4	ENST00000441480.2	-10366	no_CPG	76560137	76561137	3.85	Distal Intergenic	9
RP11-794M8.2	-2.09	3.2e-05	0.00635	ENSG00000267286.1	ENST00000593121.1	-5889	no_CPG	13191506	13192506	4.18	Distal Intergenic	18
ATL2	-2.09	4.02e-05	0.00741	ENSG00000119787.13	ENST00000406122.5	-18063	no_CPG	38395348	38396348	4.35	Distal Intergenic	2
CSMD1	-2.09	7.09e-05	0.0101	ENSG00000183117.18	ENST00000519623.1	120577	no_CPG	2922211	2923211	4.45	Distal Intergenic	8
RPL13P12	-2.09	7.43e-05	0.0103	ENSG00000215030.5	ENST00000392730.2	3885	no_CPG	17379127	17380127	4.65	Distal Intergenic	17
HIVEP3	-2.09	0.00026	0.0196	ENSG00000127124.14	ENST00000479350.1	45430	no_CPG	41823200	41824200	3.78	Intron (ENST00000372583.5/ENSG00000127124.14, intron 1 of 8)	1
RPL35AP19	-2.09	0.000376	0.0232	ENSG00000239872.1	ENST00000469425.1	-73739	no_CPG	121454204	121455204	4.25	Distal Intergenic	8
CFL1P2	-2.09	0.000413	0.0244	ENSG00000213478.2	ENST00000440986.1	-30565	no_CPG	51189036	51190036	3.7	Distal Intergenic	1
CDH22	-2.09	0.00162	0.0407	ENSG00000149654.9	ENST00000372262.7	-9790	no_CPG	46261485	46262485	3.19	Intron (ENST00000537909.2/ENSG00000149654.9, intron 1 of 11)	20
RP11-293M10.6	-2.08	1.78e-07	0.000159	ENSG00000259319.1	ENST00000558267.1	26816	no_CPG	75399874	75400874	4.83	Distal Intergenic	14
TGFBI	-2.08	7.86e-07	0.000471	ENSG00000120708.16	ENST00000442011.6	-11173	no_CPG	136016722	136017722	5.23	Distal Intergenic	5
RP11-445O3.3	-2.08	7.11e-06	0.00229	ENSG00000260763.1	ENST00000562127.1	66807	no_CPG	4372452	4373452	4.45	Distal Intergenic	5
RNU6-393P	-2.08	2.57e-05	0.00551	ENSG00000207204.1	ENST00000384475.1	-15131	no_CPG	98809955	98810955	4.28	Distal Intergenic	7
C7orf61	-2.08	8.88e-05	0.0114	ENSG00000185955.4	ENST00000418952.1	74	no_CPG	100462799	100463799	3.83	Promoter (<=1kb)	7
RP4-621F18.2	-2.08	0.000116	0.0129	ENSG00000282057.1	ENST00000472448.1	-22598	no_CPG	85544408	85545408	4.05	Intron (ENST00000535924.6/ENSG00000153904.18, intron 1 of 6)	1
RP11-1059L18.1	-2.08	0.000144	0.0144	ENSG00000253271.2	ENST00000522976.2	-14672	no_CPG	117040146	117041146	4.46	Intron (ENST00000521243.5/ENSG00000164756.12, intron 2 of 9)	8
AC112715.2	-2.08	0.000204	0.0175	ENSG00000224132.2	ENST00000445534.2	-28691	no_CPG	237227400	237228400	4.24	Distal Intergenic	2
RNU4-43P	-2.08	0.000795	0.0309	ENSG00000222560.1	ENST00000410628.1	-2309	no_CPG	26009580	26010580	3.69	Promoter (2-3kb)	5
AC009229.5	-2.08	0.00139	0.0385	ENSG00000227292.1	ENST00000450854.1	-5341	no_CPG	38244931	38245931	3.18	Distal Intergenic	2
PIM1	-2.08	0.00146	0.0391	ENSG00000137193.13	ENST00000373509.5	-25184	no_CPG	37144019	37145019	3.3	Distal Intergenic	6
ZNF79	-2.08	0.00259	0.0494	ENSG00000196152.10	ENST00000543471.5	-5707	no_CPG	127417667	127418667	2.58	Distal Intergenic	9
AC011431.1	-2.07	2.1e-07	0.000184	ENSG00000223539.4	ENST00000512971.2	31605	no_CPG	135713751	135714751	4.9	Distal Intergenic	5
RP11-398G24.2	-2.07	3.39e-06	0.00137	ENSG00000254303.1	ENST00000523792.1	-68422	no_CPG	122195606	122196606	5.03	Distal Intergenic	8
GLI2	-2.07	5.03e-06	0.00177	ENSG00000074047.21	ENST00000433812.1	21026	no_CPG	120818371	120819371	4.39	Intron (ENST00000482119.5/ENSG00000074047.21, intron 2 of 3)	2
PRICKLE2	-2.07	1.72e-05	0.00421	ENSG00000163637.11	ENST00000498162.1	-49751	no_CPG	64317730	64318730	3.97	Intron (ENST00000564377.5/ENSG00000163637.11, intron 2 of 8)	3
AC007389.1	-2.07	0.000127	0.0136	ENSG00000237979.1	ENST00000454674.1	9915	no_CPG	65491223	65492223	4.11	Intron (ENST00000606978.5/ENSG00000204929.12, intron 4 of 9)	2
CTD-2582M21.1	-2.07	0.000231	0.0184	ENSG00000251044.2	ENST00000503685.2	-29525	no_CPG	68344240	68345240	3.9	Distal Intergenic	5
SULF1	-2.07	0.000284	0.0208	ENSG00000137573.13	ENST00000526654.1	14678	no_CPG	69653489	69654489	3.59	Intron (ENST00000260128.8/ENSG00000137573.13, intron 22 of 22)	8
AC004866.1	-2.07	0.000564	0.0271	ENSG00000223514.1	ENST00000411748.1	-66890	no_CPG	81267216	81268216	4.63	Distal Intergenic	7
UBE2D1	-2.07	0.00105	0.0349	ENSG00000072401.14	ENST00000606483.1	4025	no_CPG	58372233	58373233	3.68	Distal Intergenic	10
RP11-502F1.2	-2.07	0.00108	0.0353	ENSG00000261882.1	ENST00000572529.1	23934	no_CPG	56391997	56392997	3.29	Intron (ENST00000635860.1/ENSG00000153930.11, intron 10 of 12)	17
Y_RNA	-2.07	0.0016	0.0405	ENSG00000239106.1	ENST00000459380.1	5432	no_CPG	24619081	24620081	3.5	Distal Intergenic	1
SCHIP1	-2.07	0.00188	0.0434	ENSG00000151967.18	ENST00000445224.6	-13624	no_CPG	159825237	159826237	2.56	Intron (ENST00000476809.6/ENSG00000283154.1, intron 4 of 9)	3
CLIC5	-2.06	3.87e-06	0.00147	ENSG00000112782.15	ENST00000185206.10	17419	no_CPG	46061976	46062976	4.51	Intron (ENST00000185206.10/ENSG00000112782.15, intron 1 of 5)	6
RP11-633G11.1	-2.06	7.86e-05	0.0107	ENSG00000248447.2	ENST00000513297.2	-10175	no_CPG	65046192	65047192	4.67	Distal Intergenic	4
CHN2	-2.06	0.000187	0.0167	ENSG00000106069.20	ENST00000409922.5	24	no_CPG	29288905	29289905	3.9	Promoter (<=1kb)	7
RP11-577G20.2	-2.06	0.000331	0.022	ENSG00000250078.1	ENST00000508292.1	-183606	no_CPG	58748728	58749728	3.67	Distal Intergenic	4
AKR1E2	-2.06	0.000376	0.0232	ENSG00000165568.17	ENST00000533295.5	-10083	no_CPG	4775546	4776546	3.49	Distal Intergenic	10
DZIP1	-2.06	0.0004	0.0239	ENSG00000134874.17	ENST00000485031.5	-15850	no_CPG	95603983	95604983	3.27	Intron (ENST00000361396.6/ENSG00000134874.17, intron 13 of 21)	13
GALNT15	-2.06	0.00118	0.0363	ENSG00000131386.17	ENST00000339732.9	-102629	no_CPG	16071020	16072020	3.39	Distal Intergenic	3
RP11-276H19.4	-2.06	0.00126	0.0372	ENSG00000224887.1	ENST00000437925.1	12999	no_CPG	87071152	87072152	3.04	Distal Intergenic	9
DAB2IP	-2.05	3.22e-05	0.00636	ENSG00000136848.16	ENST00000408936.7	-12988	no_CPG	121637606	121638606	3.96	Intron (ENST00000394340.7/ENSG00000136848.16, intron 1 of 5)	9
MIR4282	-2.05	3.83e-05	0.00727	ENSG00000266180.1	ENST00000583613.1	140095	no_CPG	72826658	72827658	4.52	Intron (ENST00000342056.6/ENSG00000185760.15, intron 1 of 14)	6
SMIM12P1	-2.05	9.16e-05	0.0115	ENSG00000271284.1	ENST00000603004.1	-19441	no_CPG	108403171	108404171	4.33	Distal Intergenic	2
MRC1	-2.05	9.77e-05	0.0118	ENSG00000260314.2	ENST00000569591.2	-25432	no_CPG	17782912	17783912	3.73	Intron (ENST00000377495.1/ENSG00000148483.8, intron 3 of 3)	10
KLRD1	-2.05	0.000105	0.0122	ENSG00000134539.16	ENST00000381908.7	0	no_CPG	10303797	10304797	4.22	Promoter (<=1kb)	12
RP11-320G24.1	-2.05	0.000339	0.0222	ENSG00000236393.1	ENST00000447570.1	15599	no_CPG	40278565	40279565	3.37	Intron (ENST00000452690.1/ENSG00000236393.1, intron 1 of 2)	23
RP11-612J15.3	-2.05	0.000773	0.0305	ENSG00000250622.1	ENST00000508378.1	1489	no_CPG	156974120	156975120	3.57	Promoter (1-2kb)	4
RP11-874J12.3	-2.05	0.00108	0.0353	ENSG00000266513.1	ENST00000584060.1	-11171	no_CPG	3782601	3783601	4.03	Intron (ENST00000400147.6/ENSG00000170579.15, intron 2 of 9)	18
SNORA14A	-2.04	9.84e-06	0.00285	ENSG00000201643.1	ENST00000364773.1	-8567	no_CPG	75934215	75935215	4.13	Intron (ENST00000453773.5/ENSG00000127948.14, intron 1 of 4)	7
SLC39A11	-2.04	3.33e-05	0.00652	ENSG00000133195.11	ENST00000579988.1	25356	no_CPG	72699258	72700258	4.88	Intron (ENST00000255559.7/ENSG00000133195.11, intron 7 of 9)	17
TESK2	-2.04	0.000166	0.0156	ENSG00000070759.16	ENST00000493974.1	14803	no_CPG	45441818	45442818	4.47	Intron (ENST00000372084.5/ENSG00000070759.16, intron 1 of 8)	1
RP11-54O15.3	-2.04	0.000188	0.0167	ENSG00000224764.1	ENST00000439872.1	5561	no_CPG	94928385	94929385	4.09	Exon (ENST00000277198.6/ENSG00000148120.15, exon 7 of 8)	9
CTD-2292M14.1	-2.04	0.000302	0.0211	ENSG00000248474.1	ENST00000511395.1	74070	no_CPG	74028146	74029146	3.66	Distal Intergenic	5
RP11-317F20.2	-2.04	0.000429	0.0248	ENSG00000229668.1	ENST00000412744.1	-2458	no_CPG	114504805	114505805	3.57	Promoter (2-3kb)	10
MYH9	-2.04	0.000449	0.0253	ENSG00000100345.20	ENST00000456729.1	13417	no_CPG	36350694	36351694	3.56	Intron (ENST00000216181.9/ENSG00000100345.20, intron 1 of 40)	22
MYLK-AS2	-2.04	0.000924	0.0327	ENSG00000250174.5	ENST00000510827.5	-620	no_CPG	123688024	123689024	3.56	Promoter (<=1kb)	3
SVEP1	-2.04	0.00109	0.0353	ENSG00000165124.17	ENST00000374469.5	5857	no_CPG	110572881	110573881	3.37	Intron (ENST00000401783.6/ENSG00000165124.17, intron 1 of 47)	9
RNU6-919P	-2.03	1.32e-05	0.00344	ENSG00000252540.1	ENST00000516731.1	-25759	no_CPG	49768052	49769052	4.59	Distal Intergenic	20
RP11-736P16.1	-2.03	1.68e-05	0.00413	ENSG00000259061.1	ENST00000554181.1	-674	no_CPG	86934966	86935966	4.36	Promoter (<=1kb)	14
ALKBH8	-2.03	2.52e-05	0.00545	ENSG00000137760.14	ENST00000389568.7	19676	no_CPG	107544842	107545842	4.45	Intron (ENST00000428149.6/ENSG00000137760.14, intron 7 of 11)	11
AC002401.1	-2.03	7.82e-05	0.0107	ENSG00000236472.1	ENST00000451776.1	-1632	no_CPG	50132954	50133954	3.71	Promoter (1-2kb)	17
Y_RNA	-2.03	0.000312	0.0213	ENSG00000201026.1	ENST00000364156.1	-13686	no_CPG	2170024	2171024	3.45	Distal Intergenic	5
RP11-624L4.1	-2.03	0.000641	0.0285	ENSG00000259345.5	ENST00000560197.5	42632	no_CPG	39075081	39076081	3.35	Intron (ENST00000560197.5/ENSG00000259345.5, intron 1 of 7)	15
RP11-399N22.3	-2.03	0.00141	0.0386	ENSG00000231366.1	ENST00000435209.1	-9620	no_CPG	70804143	70805143	3.47	Distal Intergenic	10
RP11-323I1.1	-2.03	0.00241	0.0479	ENSG00000228255.1	ENST00000456240.1	-5635	no_CPG	213724781	213725781	3.15	Distal Intergenic	1
FNBP1	-2.02	1.03e-05	0.00295	ENSG00000187239.16	ENST00000491905.1	-21396	no_CPG	130016331	130017331	4.54	Intron (ENST00000446176.6/ENSG00000187239.16, intron 1 of 16)	9
BTBD3	-2.02	1.14e-05	0.00315	ENSG00000132640.14	ENST00000473180.1	74279	no_CPG	11995845	11996845	4.29	Distal Intergenic	20
LIMCH1	-2.02	1.83e-05	0.00432	ENSG00000064042.17	ENST00000515847.1	58408	no_CPG	41477147	41478147	4.93	Intron (ENST00000513024.5/ENSG00000064042.17, intron 1 of 25)	4
ITGA9	-2.02	2.9e-05	0.00604	ENSG00000144668.11	ENST00000461533.1	29046	no_CPG	37712922	37713922	4.06	Intron (ENST00000264741.9/ENSG00000144668.11, intron 18 of 27)	3
DUSP10	-2.02	3.28e-05	0.00646	ENSG00000143507.17	ENST00000494642.1	1975	no_CPG	221708841	221709841	4.18	Promoter (1-2kb)	1
LPP	-2.02	3.78e-05	0.0072	ENSG00000145012.12	ENST00000457242.1	4211	no_CPG	188244075	188245075	4.34	Intron (ENST00000448637.5/ENSG00000145012.12, intron 1 of 6)	3
GMDS	-2.02	7.71e-05	0.0106	ENSG00000112699.10	ENST00000533279.1	46380	no_CPG	1679097	1680097	3.92	Exon (ENST00000533279.1/ENSG00000112699.10, exon 2 of 2)	6
RP11-289F5.1	-2.02	9.17e-05	0.0115	ENSG00000226798.1	ENST00000397864.2	-212221	no_CPG	81083516	81084516	3.44	Distal Intergenic	9
RNU7-6P	-2.02	0.000287	0.0208	ENSG00000252654.1	ENST00000516845.1	25502	no_CPG	51930471	51931471	3.72	Distal Intergenic	20
R3HCC1L	-2.02	0.000367	0.023	ENSG00000166024.13	ENST00000370584.7	-7914	no_CPG	98125710	98126710	3.64	Distal Intergenic	10
RP11-483L5.1	-2.02	0.000392	0.0237	ENSG00000255462.1	ENST00000527726.1	14064	no_CPG	11584148	11585148	3.46	Intron (ENST00000227756.4/ENSG00000110328.5, intron 1 of 10)	11
RP11-44M6.1	-2.02	0.000578	0.0273	ENSG00000225807.1	ENST00000392471.2	6114	no_CPG	100515831	100516831	3.56	Exon (ENST00000392471.2/ENSG00000225807.1, exon 3 of 5)	7
SNX18P25	-2.02	0.00158	0.0403	ENSG00000249337.2	ENST00000510539.2	676806	no_CPG	50265578	50266578	3.13	Distal Intergenic	4
GS1-21A4.1	-2.02	0.00184	0.0429	ENSG00000260603.1	ENST00000562644.1	-15344	no_CPG	87909029	87910029	2.69	Intron (ENST00000309893.3/ENSG00000174990.4, intron 2 of 6)	16
SIPA1L2	-2.02	0.00218	0.0459	ENSG00000116991.10	ENST00000366630.5	-38512	no_CPG	232600070	232601070	3.79	Distal Intergenic	1
KCNA5	-2.01	5.39e-06	0.00186	ENSG00000130037.4	ENST00000252321.4	41599	no_CPG	5085588	5086588	5.09	Distal Intergenic	12
AC006482.1	-2.01	4.59e-05	0.00791	ENSG00000228675.1	ENST00000448898.1	16595	no_CPG	17696144	17697144	4.49	Distal Intergenic	7
PLEKHG1	-2.01	6.31e-05	0.00952	ENSG00000120278.15	ENST00000367326.1	-17159	no_CPG	150581724	150582724	4.75	Distal Intergenic	6
GM140	-2.01	8.88e-05	0.0114	ENSG00000179452.2	ENST00000319701.2	73842	no_CPG	181310230	181311230	4.4	Distal Intergenic	1
MTRF1	-2.01	0.000151	0.0149	ENSG00000120662.15	ENST00000473492.1	9735	no_CPG	41215834	41216834	3.71	3' UTR	13
CTD-2026A21.1	-2.01	0.000165	0.0155	ENSG00000279869.1	ENST00000624118.1	47343	no_CPG	25763614	25764614	3.52	Distal Intergenic	5
P2RX7	-2.01	0.000305	0.0212	ENSG00000089041.16	ENST00000539695.5	0	no_CPG	121132884	121133884	3.7	Promoter (<=1kb)	12
PAK1	-2.01	0.00035	0.0224	ENSG00000149269.9	ENST00000526968.1	-31897	no_CPG	77506532	77507532	3.54	Distal Intergenic	11
RNU6-600P	-2.01	0.000456	0.0253	ENSG00000199394.1	ENST00000362524.1	8396	no_CPG	48882832	48883832	3.32	Distal Intergenic	12
RP4-597N16.1	-2.01	0.000503	0.0258	ENSG00000233018.1	ENST00000426692.1	6258	no_CPG	235090154	235091154	3.53	Distal Intergenic	1
ABCC8	-2.01	0.000791	0.0308	ENSG00000006071.12	ENST00000612903.1	2724	no_CPG	17473054	17474054	3.35	Promoter (2-3kb)	11
RNU6-295P	-2.01	0.000848	0.0316	ENSG00000252710.1	ENST00000516901.1	2169	no_CPG	48304861	48305861	3.63	Promoter (2-3kb)	8
RP4-718N17.2	-2.01	0.000905	0.0326	ENSG00000229403.1	ENST00000414409.1	-1677	no_CPG	51611574	51612574	3.53	Promoter (1-2kb)	7
CAPNS1	-2.01	0.00107	0.0352	ENSG00000126247.10	ENST00000246533.7	-1855	no_CPG	36136720	36137720	3.69	Promoter (1-2kb)	19
RP11-145E17.2	-2.01	0.00154	0.0399	ENSG00000223729.1	ENST00000417135.1	11487	no_CPG	134282910	134283910	3.77	Distal Intergenic	9
SLC2A1	-2	7.64e-07	0.000471	ENSG00000117394.19	ENST00000439722.2	-5029	no_CPG	42936154	42937154	5.98	Intron (ENST00000426263.7/ENSG00000117394.19, intron 2 of 9)	1
RAP1A	-2	2.7e-06	0.00117	ENSG00000116473.14	ENST00000356415.5	-3055	no_CPG	111538163	111539163	5.14	Intron (ENST00000369717.8/ENSG00000121933.18, intron 1 of 5)	1
DNAI1	-2	4.88e-06	0.00174	ENSG00000122735.15	ENST00000470169.5	-4152	no_CPG	34501475	34502475	5.07	Intron (ENST00000614641.4/ENSG00000122735.15, intron 12 of 19)	9
BCYRN1	-2	5.66e-06	0.0019	ENSG00000236824.2	ENST00000418539.2	-24311	no_CPG	47310004	47311004	4.22	Intron (ENST00000448713.5/ENSG00000234690.6, intron 2 of 2)	2
TTC8	-2	5.99e-05	0.00919	ENSG00000165533.18	ENST00000557580.2	63084	no_CPG	88904569	88905569	3.83	Distal Intergenic	14
AC072061.2	-2	7.18e-05	0.0101	ENSG00000237251.2	ENST00000413879.1	-4857	no_CPG	39810692	39811692	4.33	Distal Intergenic	7
FAT1P1	-2	7.94e-05	0.0107	ENSG00000217809.1	ENST00000406588.1	26802	no_CPG	10861286	10862286	4.33	Intron (ENST00000605292.5/ENSG00000270792.5, intron 1 of 4)	20
UBE2QL1	-2	7.98e-05	0.0107	ENSG00000215218.3	ENST00000399816.3	39145	no_CPG	6487768	6488768	4.41	Intron (ENST00000399816.3/ENSG00000215218.3, intron 1 of 1)	5
UBE2V1P10	-2	0.000474	0.0254	ENSG00000226590.1	ENST00000414685.1	-162896	no_CPG	84995786	84996786	3.79	Intron (ENST00000376213.5/ENSG00000148053.15, intron 18 of 19)	9
RP5-837O21.2	-2	0.000626	0.0281	ENSG00000233129.1	ENST00000438864.1	-29074	no_CPG	93964318	93965318	3.99	Distal Intergenic	1
RP11-200A1.1	-2	0.000847	0.0316	ENSG00000240006.1	ENST00000482019.1	6876	no_CPG	134320452	134321452	3.7	Exon (ENST00000482019.1/ENSG00000240006.1, exon 2 of 2)	3
SLC8A1	-2	0.00106	0.035	ENSG00000183023.18	ENST00000407929.6	24193	no_CPG	40405078	40406078	3.44	Intron (ENST00000406785.6/ENSG00000183023.18, intron 2 of 7)	2
PPP1R3C	-2	0.00114	0.0358	ENSG00000119938.8	ENST00000238994.5	27204	no_CPG	91604850	91605850	3.34	Distal Intergenic	10
ZNF608	-1.99	5.41e-05	0.00868	ENSG00000168916.15	ENST00000513985.5	44177	no_CPG	124599160	124600160	4.52	Distal Intergenic	5
EPB41L2	-1.99	0.000135	0.0139	ENSG00000079819.17	ENST00000527659.5	-1657	no_CPG	130958142	130959142	3.31	Promoter (1-2kb)	6
LINC00636	-1.99	0.000286	0.0208	ENSG00000240423.1	ENST00000494231.1	1525	no_CPG	107884773	107885773	3.77	Promoter (1-2kb)	3
RNU7-14P	-1.99	0.000415	0.0244	ENSG00000238468.1	ENST00000459331.1	-11615	no_CPG	53680373	53681373	3.7	Distal Intergenic	20
KRT18P19	-1.99	0.00115	0.0359	ENSG00000213601.3	ENST00000395181.2	23119	no_CPG	189287848	189288848	3.33	Distal Intergenic	2
RP11-444D3.1	-1.99	0.00125	0.0371	ENSG00000255864.5	ENST00000538905.1	64833	no_CPG	24496549	24497549	3.23	Intron (ENST00000540811.5/ENSG00000255864.5, intron 1 of 4)	12
UST	-1.99	0.00131	0.0377	ENSG00000111962.7	ENST00000466695.1	-4434	no_CPG	149060742	149061742	3.62	Intron (ENST00000367463.4/ENSG00000111962.7, intron 7 of 7)	6
WNT7B	-1.99	0.00202	0.0448	ENSG00000188064.9	ENST00000409496.7	39909	no_CPG	45931806	45932806	4.03	Intron (ENST00000339464.8/ENSG00000188064.9, intron 2 of 3)	22
RP11-369K17.2	-1.98	7.03e-08	8.17e-05	ENSG00000271219.1	ENST00000604710.1	-31301	no_CPG	121145220	121146220	5.63	Distal Intergenic	8
MLXIPL	-1.98	2.1e-05	0.00481	ENSG00000009950.15	ENST00000456640.1	1182	no_CPG	73613979	73614979	4.2	Promoter (1-2kb)	7
SRRM1	-1.98	2.43e-05	0.00533	ENSG00000133226.16	ENST00000474843.1	32697	no_CPG	24702280	24703280	4.9	Distal Intergenic	1
RP11-25I15.3	-1.98	3.92e-05	0.00733	ENSG00000257114.2	ENST00000550177.2	64467	no_CPG	42756683	42757683	5.09	Distal Intergenic	12
RP11-6C14.1	-1.98	0.000102	0.012	ENSG00000250488.1	ENST00000513718.1	-148865	no_CPG	159926649	159927649	3.67	Distal Intergenic	4
RP11-454P21.1	-1.98	0.000129	0.0136	ENSG00000249937.5	ENST00000510648.1	31860	no_CPG	17951088	17952088	3.83	Intron (ENST00000511596.5/ENSG00000249937.5, intron 4 of 4)	5
RNU6-1263P	-1.98	0.000149	0.0148	ENSG00000207331.1	ENST00000384601.1	5549	no_CPG	98914008	98915008	3.66	Intron (ENST00000474798.1/ENSG00000239462.1, intron 2 of 3)	3
LINC00052	-1.98	0.000469	0.0253	ENSG00000259527.2	ENST00000560153.2	2336	no_CPG	87579265	87580265	3.84	Promoter (2-3kb)	15
RNU6-690P	-1.98	0.000503	0.0258	ENSG00000202112.1	ENST00000365242.1	93824	no_CPG	95692938	95693938	3.68	Intron (ENST00000517437.1/ENSG00000253773.2, intron 2 of 3)	8
RP11-5P22.1	-1.98	0.0014	0.0385	ENSG00000234838.3	ENST00000414951.2	-17152	no_CPG	66553905	66554905	3.91	Distal Intergenic	5
RP4-815D20.1	-1.98	0.0017	0.0416	ENSG00000279578.1	ENST00000622993.1	-65331	no_CPG	48781435	48782435	3.32	Distal Intergenic	7
PVT1	-1.97	4.56e-05	0.00789	ENSG00000249859.8	ENST00000513868.6	0	no_CPG	127889654	127890654	4.41	Promoter (<=1kb)	8
AC109344.1	-1.97	7.81e-05	0.0107	ENSG00000279515.1	ENST00000623296.1	-5988	no_CPG	109350906	109351906	4.42	Intron (ENST00000309415.7/ENSG00000172985.10, intron 2 of 9)	2
AC097724.3	-1.97	9.98e-05	0.0119	ENSG00000226833.5	ENST00000444501.1	18122	no_CPG	28716987	28717987	4.79	Intron (ENST00000452212.1/ENSG00000226833.5, intron 1 of 1)	2
SCN7A	-1.97	0.000117	0.013	ENSG00000136546.13	ENST00000419992.5	-138015	no_CPG	166632262	166633262	4.41	Distal Intergenic	2
AFF3	-1.97	0.000221	0.0181	ENSG00000144218.18	ENST00000445815.1	-84022	no_CPG	99662392	99663392	5.7	Intron (ENST00000409236.6/ENSG00000144218.18, intron 10 of 22)	2
RHBDF1P1	-1.97	0.000271	0.0202	ENSG00000234123.1	ENST00000427504.1	7773	no_CPG	14566019	14567019	3.83	Distal Intergenic	3
RP11-734K21.4	-1.97	0.000272	0.0202	ENSG00000240980.1	ENST00000474561.1	22106	no_CPG	9165272	9166272	3.74	Distal Intergenic	2
RP11-513H8.1	-1.97	0.000342	0.0222	ENSG00000253627.1	ENST00000523317.1	-18028	no_CPG	134338475	134339475	4.27	Distal Intergenic	8
LINC01583	-1.97	0.000605	0.0278	ENSG00000259518.1	ENST00000557838.1	33432	no_CPG	82122123	82123123	3.6	Distal Intergenic	15
UBE2CP3	-1.97	0.00109	0.0354	ENSG00000250384.1	ENST00000502715.1	5782	no_CPG	57078465	57079465	3.82	Intron (ENST00000295666.6/ENSG00000163453.11, intron 1 of 4)	4
ANKFN1	-1.96	6.91e-06	0.00227	ENSG00000153930.11	ENST00000575594.1	15084	no_CPG	56126042	56127042	4.78	Intron (ENST00000635860.1/ENSG00000153930.11, intron 4 of 12)	17
RNU1-96P	-1.96	1.62e-05	0.00404	ENSG00000201033.1	ENST00000364163.1	-9698	no_CPG	27503173	27504173	4.19	Distal Intergenic	3
ARHGAP24	-1.96	7.49e-05	0.0103	ENSG00000138639.17	ENST00000509300.5	-19567	no_CPG	85807178	85808178	3.96	Intron (ENST00000395184.5/ENSG00000138639.17, intron 3 of 9)	4
RP3-449H6.2	-1.96	0.000113	0.0128	ENSG00000279076.1	ENST00000624717.1	101869	no_CPG	44653446	44654446	3.81	Distal Intergenic	6
RNF144A	-1.96	0.000117	0.013	ENSG00000151692.14	ENST00000432850.1	10655	no_CPG	7007595	7008595	4.24	Intron (ENST00000320892.10/ENSG00000151692.14, intron 3 of 8)	2
RP11-61J19.2	-1.96	0.000536	0.0266	ENSG00000224535.1	ENST00000439570.1	-14651	no_CPG	212482394	212483394	3.82	Distal Intergenic	1
AC005008.3	-1.96	0.00112	0.0356	ENSG00000226671.1	ENST00000456151.1	65211	no_CPG	81256609	81257609	3.31	Distal Intergenic	7
TRAF7	-1.96	0.00198	0.0444	ENSG00000131653.12	ENST00000570169.1	561	no_CPG	2174074	2175074	3.31	Promoter (<=1kb)	16
RBMS1	-1.95	3.77e-05	0.0072	ENSG00000153250.18	ENST00000392753.7	0	no_CPG	160367524	160368524	4.01	Promoter (<=1kb)	2
RP11-398H6.1	-1.95	0.000604	0.0278	ENSG00000254258.1	ENST00000522373.1	121076	no_CPG	139340940	139341940	5.08	Distal Intergenic	8
SRI	-1.95	0.000731	0.0298	ENSG00000075142.13	ENST00000489079.1	1632	no_CPG	88224321	88225321	3.82	Promoter (1-2kb)	7
AC004920.3	-1.95	0.000742	0.0299	ENSG00000236046.1	ENST00000422831.1	23078	no_CPG	50817914	50818914	3.82	Distal Intergenic	7
LINC00907	-1.95	0.0014	0.0385	ENSG00000267586.6	ENST00000589068.5	5926	no_CPG	42192629	42193629	3.18	Intron (ENST00000601948.5/ENSG00000267586.6, intron 3 of 4)	18
N4BP1	-1.94	2.3e-05	0.00515	ENSG00000102921.7	ENST00000569027.1	9524	no_CPG	48536060	48537060	4.21	Downstream (1-2kb)	16
CTC-321K16.4	-1.94	0.000269	0.02	ENSG00000251045.1	ENST00000508452.1	24033	no_CPG	135628902	135629902	3.88	Exon (ENST00000509372.1/ENSG00000250167.1, exon 3 of 4)	5
RNU6-393P	-1.94	0.000438	0.025	ENSG00000207204.1	ENST00000384475.1	22630	no_CPG	98771194	98772194	4.66	Distal Intergenic	7
RP11-492M23.2	-1.94	0.000473	0.0254	ENSG00000229605.5	ENST00000480465.1	-76174	no_CPG	28975658	28976658	4.01	Distal Intergenic	10
RP11-805L22.1	-1.94	0.000505	0.0258	ENSG00000266448.1	ENST00000578645.1	-18753	no_CPG	31689815	31690815	3.38	Distal Intergenic	17
AC006960.5	-1.94	0.000567	0.0271	ENSG00000234457.1	ENST00000419980.1	-1708	no_CPG	36302923	36303923	5.01	Promoter (1-2kb)	7
CTD-3037G24.5	-1.94	0.00154	0.0399	ENSG00000274834.1	ENST00000615100.1	46980	no_CPG	12661431	12662431	3.17	3' UTR	16
SPATA13	-1.94	0.00246	0.0483	ENSG00000228741.2	ENST00000439928.2	58600	no_CPG	24038410	24039410	3.88	Intron (ENST00000382141.4/ENSG00000273167.1, intron 3 of 15)	13
PLEKHB1	-1.93	1.08e-05	0.00306	ENSG00000021300.13	ENST00000426191.2	0	no_CPG	73651985	73652985	4.27	Promoter (<=1kb)	11
RP11-514F3.4	-1.93	0.000198	0.0173	ENSG00000254566.1	ENST00000529910.1	10166	no_CPG	36312274	36313274	4.28	Intron (ENST00000531269.5/ENSG00000135362.13, intron 2 of 2)	11
CTB-49A3.4	-1.93	0.000237	0.0187	ENSG00000250244.5	ENST00000507403.1	25425	no_CPG	133292010	133293010	3.79	Intron (ENST00000265342.11/ENSG00000053108.16, intron 6 of 15)	5
RPS3AP6	-1.93	0.000339	0.0222	ENSG00000234797.5	ENST00000484430.1	-26412	no_CPG	59740940	59741940	3.79	Distal Intergenic	15
SNRPGP10	-1.93	0.000452	0.0253	ENSG00000235363.1	ENST00000432323.1	811	no_CPG	205352058	205353058	3.37	Promoter (<=1kb)	1
COL21A1	-1.92	6.15e-06	0.00205	ENSG00000124749.16	ENST00000370819.5	11366	no_CPG	56381728	56382728	4.71	Intron (ENST00000370819.5/ENSG00000124749.16, intron 1 of 28)	6
RNU6-281P	-1.92	7.7e-05	0.0106	ENSG00000206939.1	ENST00000384212.1	23810	no_CPG	70832160	70833160	4.22	Distal Intergenic	3
CAP1	-1.92	0.000524	0.0263	ENSG00000131236.16	ENST00000372797.7	-8734	no_CPG	40030499	40031499	3.79	Distal Intergenic	1
HR	-1.92	0.000612	0.0279	ENSG00000168453.14	ENST00000522016.1	0	no_CPG	22117460	22118460	3.78	Promoter (<=1kb)	8
RP11-644L4.1	-1.92	0.00114	0.0358	ENSG00000255605.1	ENST00000545912.1	24950	no_CPG	95723036	95724036	4.17	Distal Intergenic	11
NCKAP5	-1.91	2.33e-06	0.00105	ENSG00000176771.15	ENST00000427594.5	11968	no_CPG	133504545	133505545	5.07	Intron (ENST00000409261.5/ENSG00000176771.15, intron 3 of 19)	2
RP11-367F23.1	-1.91	1.61e-05	0.00402	ENSG00000228216.1	ENST00000427745.1	29543	no_CPG	90934850	90935850	4.35	Distal Intergenic	9
RP3-331H24.7	-1.91	0.000177	0.0161	ENSG00000279312.1	ENST00000625013.1	-4	no_CPG	71375391	71376391	3.62	Promoter (<=1kb)	6
PITPNC1	-1.91	0.000752	0.0301	ENSG00000154217.14	ENST00000584471.5	11233	no_CPG	67390199	67391199	4.11	Intron (ENST00000299954.13/ENSG00000154217.14, intron 1 of 8)	17
AC008622.1	-1.91	0.00101	0.0344	ENSG00000280050.1	ENST00000624320.1	-2874	no_CPG	46796063	46797063	3.35	Promoter (2-3kb)	19
NRP2	-1.91	0.00106	0.035	ENSG00000118257.16	ENST00000468256.1	2090	no_CPG	205754558	205755558	3.63	Promoter (2-3kb)	2
CDK14	-1.91	0.00138	0.0384	ENSG00000058091.16	ENST00000460493.1	71222	no_CPG	91027014	91028014	3.26	Intron (ENST00000380050.7/ENSG00000058091.16, intron 10 of 14)	7
CNIH1	-1.9	4.51e-05	0.00789	ENSG00000100528.11	ENST00000216416.8	-4538	no_CPG	54445969	54446969	4.3	Distal Intergenic	14
RP11-64K10.1	-1.9	6.58e-05	0.0098	ENSG00000259227.2	ENST00000558111.2	3115	no_CPG	70605239	70606239	4.65	Distal Intergenic	15
RP11-701P16.3	-1.9	0.000203	0.0174	ENSG00000251147.1	ENST00000503355.1	0	no_CPG	184910904	184911904	3.53	Promoter (<=1kb)	4
RP11-385G16.1	-1.9	0.00022	0.0181	ENSG00000274682.1	ENST00000615828.1	1490	no_CPG	40980234	40981234	3.91	Promoter (1-2kb)	12
NABP1	-1.9	0.000264	0.0197	ENSG00000173559.12	ENST00000491331.5	-83554	no_CPG	191593514	191594514	3.97	Distal Intergenic	2
RNA5SP89	-1.9	0.000441	0.025	ENSG00000222232.1	ENST00000410300.1	-59	no_CPG	28682917	28683917	4.36	Promoter (<=1kb)	2
IKZF3	-1.9	0.000517	0.0261	ENSG00000161405.16	ENST00000583368.1	7588	no_CPG	39769637	39770637	4.95	Intron (ENST00000346872.7/ENSG00000161405.16, intron 7 of 7)	17
THADA	-1.9	0.00128	0.0374	ENSG00000115970.18	ENST00000497770.1	30724	no_CPG	43340513	43341513	4.26	Intron (ENST00000405975.6/ENSG00000115970.18, intron 30 of 37)	2
METTL2A	-1.9	0.00157	0.0402	ENSG00000087995.15	ENST00000311506.9	-6356	no_CPG	62416511	62417511	2.75	Distal Intergenic	17
CYCSP53	-1.9	0.00187	0.0432	ENSG00000234333.2	ENST00000455540.2	10786	no_CPG	171433177	171434177	3.85	Distal Intergenic	1
PDE1A	-1.9	0.0025	0.0486	ENSG00000115252.18	ENST00000495511.1	-64339	no_CPG	182587531	182588531	3.7	Distal Intergenic	2
RP11-88H9.2	-1.89	0.000144	0.0144	ENSG00000231437.3	ENST00000438293.1	35900	no_CPG	112026436	112027436	4.52	Distal Intergenic	1
NCOA1	-1.89	0.000161	0.0155	ENSG00000084676.15	ENST00000496333.5	-61546	no_CPG	24429368	24430368	4.03	Distal Intergenic	2
RP11-418J17.3	-1.89	0.000181	0.0163	ENSG00000227712.1	ENST00000457719.1	27914	no_CPG	119298389	119299389	4.29	Intron (ENST00000457719.1/ENSG00000227712.1, intron 1 of 2)	1
RP11-521D12.2	-1.89	0.000345	0.0224	ENSG00000244260.1	ENST00000483023.1	-14333	no_CPG	9658690	9659690	3.52	Distal Intergenic	2
UQCC1	-1.89	0.00147	0.0392	ENSG00000101019.21	ENST00000397556.7	6159	no_CPG	35387044	35388044	3.54	Intron (ENST00000457259.5/ENSG00000101019.21, intron 2 of 6)	20
RP11-159D12.8	-1.89	0.00156	0.04	ENSG00000279207.1	ENST00000624409.1	25948	no_CPG	58121620	58122620	3.25	Distal Intergenic	17
TRPV4	-1.89	0.00199	0.0445	ENSG00000111199.10	ENST00000538125.5	-6897	no_CPG	109840298	109841298	3.53	Distal Intergenic	12
AC138623.1	-1.89	0.0021	0.0454	ENSG00000223977.1	ENST00000418060.1	-123736	no_CPG	83342841	83343841	3.45	Distal Intergenic	2
CTD-2218G20.1	-1.88	9.22e-06	0.00273	ENSG00000251062.1	ENST00000504072.1	34967	no_CPG	32852178	32853178	4.52	Distal Intergenic	5
C10orf11	-1.88	0.000171	0.0158	ENSG00000148655.14	ENST00000611306.1	77873	no_CPG	76113879	76114879	4.39	Intron (ENST00000611255.4/ENSG00000148655.14, intron 5 of 6)	10
PKP1	-1.88	0.000464	0.0253	ENSG00000081277.12	ENST00000263946.7	-7373	no_CPG	201275079	201276079	4.46	Distal Intergenic	1
A4GALT	-1.88	0.000477	0.0254	ENSG00000128274.15	ENST00000401850.5	5916	no_CPG	42688070	42689070	3.5	Distal Intergenic	22
CLEC19A	-1.88	0.00054	0.0266	ENSG00000261210.6	ENST00000493231.5	-727	no_CPG	19284012	19285012	3.89	Promoter (<=1kb)	16
EPB41L4A	-1.88	0.000599	0.0276	ENSG00000129595.12	ENST00000507810.5	0	no_CPG	112228318	112229318	3.83	Promoter (<=1kb)	5
CTD-2247C11.5	-1.88	0.000657	0.0289	ENSG00000250529.1	ENST00000507950.1	7705	no_CPG	5069606	5070606	3.42	Exon (ENST00000508201.5/ENSG00000215231.7, exon 8 of 8)	5
INTS9	-1.88	0.00131	0.0378	ENSG00000104299.14	ENST00000520316.5	0	no_CPG	28775828	28776828	3.9	Promoter (<=1kb)	8
RABGAP1L	-1.88	0.00162	0.0408	ENSG00000152061.23	ENST00000485114.1	3431	no_CPG	174968390	174969390	3.34	3' UTR	1
RPL7P45	-1.88	0.00218	0.0459	ENSG00000225823.1	ENST00000455851.1	135562	no_CPG	104949889	104950889	3.53	Distal Intergenic	13
TNS3	-1.87	1.55e-06	0.000741	ENSG00000136205.16	ENST00000457718.5	-13938	no_CPG	47596496	47597496	4.88	Distal Intergenic	7
Y_RNA	-1.87	4.75e-05	0.00806	ENSG00000223302.1	ENST00000411370.1	12224	no_CPG	110629561	110630561	4.98	Distal Intergenic	10
SEMA6A-AS1	-1.87	4.84e-05	0.00815	ENSG00000248445.5	ENST00000514214.1	3927	no_CPG	116453657	116454657	4.22	Intron (ENST00000508424.5/ENSG00000248445.5, intron 2 of 2)	5
RNF43	-1.87	5.83e-05	0.00909	ENSG00000108375.12	ENST00000577625.5	36	no_CPG	58401685	58402685	4.33	Promoter (<=1kb)	17
CHDH	-1.87	0.000172	0.0158	ENSG00000016391.10	ENST00000481668.5	1104	no_CPG	53842513	53843513	3.74	Promoter (1-2kb)	3
FAM135B	-1.87	0.000233	0.0185	ENSG00000147724.11	ENST00000276737.10	-23552	no_CPG	138520374	138521374	5.04	Distal Intergenic	8
CTD-2325P2.4	-1.87	0.000242	0.019	ENSG00000259038.1	ENST00000556301.1	799	no_CPG	68626646	68627646	3.95	Promoter (<=1kb)	14
LINC01411	-1.87	0.000301	0.021	ENSG00000249306.5	ENST00000510234.5	34744	no_CPG	174371239	174372239	3.88	Intron (ENST00000515513.5/ENSG00000249306.5, intron 1 of 4)	5
KCNG1	-1.87	0.000504	0.0258	ENSG00000026559.13	ENST00000371571.4	-10296	no_CPG	51033425	51034425	3.82	Distal Intergenic	20
U3	-1.87	0.000516	0.0261	ENSG00000221040.2	ENST00000408113.2	-9703	no_CPG	116267903	116268903	4.13	Distal Intergenic	1
TTC7B	-1.87	0.000626	0.0281	ENSG00000165914.14	ENST00000554654.5	-809	no_CPG	90645753	90646753	3.74	Promoter (<=1kb)	14
RP11-600L4.1	-1.87	0.000627	0.0281	ENSG00000251642.1	ENST00000506010.1	26930	no_CPG	38313924	38314924	4.18	Distal Intergenic	4
RP11-355I22.8	-1.87	0.00151	0.0395	ENSG00000270852.1	ENST00000604527.1	-136998	no_CPG	62289256	62290256	4.02	Distal Intergenic	14
RP1-53O8.2	-1.87	0.00163	0.0409	ENSG00000278255.1	ENST00000613391.1	53918	no_CPG	2163002	2164002	4.38	Intron (ENST00000335762.9/ENSG00000151067.21, intron 3 of 47)	12
RP11-507B12.1	-1.87	0.00173	0.042	ENSG00000259675.1	ENST00000559590.1	0	no_CPG	61714782	61715782	3.75	Promoter (<=1kb)	15
HNRNPA3P4	-1.87	0.00177	0.0423	ENSG00000226068.1	ENST00000427514.1	13701	no_CPG	48135304	48136304	3.6	Distal Intergenic	6
AC006037.2	-1.87	0.00227	0.0467	ENSG00000226442.2	ENST00000437967.2	2256	no_CPG	234111337	234112337	4.12	Promoter (2-3kb)	2
GPCPD1	-1.87	0.0025	0.0485	ENSG00000125772.12	ENST00000379019.5	-35877	no_CPG	5646903	5647903	3.24	Distal Intergenic	20
RP11-342D11.3	-1.86	1.18e-06	0.000651	ENSG00000233387.1	ENST00000414308.1	-12609	no_CPG	33129281	33130281	5.24	Distal Intergenic	10
RP11-138A23.2	-1.86	1.25e-05	0.0033	ENSG00000250180.1	ENST00000502846.1	19080	no_CPG	159417613	159418613	4.9	Distal Intergenic	4
AC026248.1	-1.86	0.000664	0.029	ENSG00000280151.1	ENST00000623475.1	11771	no_CPG	128129782	128130782	4.07	Distal Intergenic	8
DISC1	-1.86	0.000693	0.0292	ENSG00000162946.20	ENST00000468399.2	6517	no_CPG	231635907	231636907	3.82	Intron (ENST00000602567.1/ENSG00000270106.5, intron 6 of 12)	1
SH3PXD2B	-1.86	0.000783	0.0306	ENSG00000174705.12	ENST00000636523.1	10136	no_CPG	172443172	172444172	3.87	Intron (ENST00000636523.1/ENSG00000174705.12, intron 1 of 13)	5
BICC1	-1.86	0.000836	0.0316	ENSG00000122870.11	ENST00000476684.1	29893	no_CPG	58650742	58651742	4	Exon (ENST00000476684.1/ENSG00000122870.11, exon 2 of 2)	10
HNRNPA3P4	-1.86	0.00103	0.0347	ENSG00000226068.1	ENST00000427514.1	-815	no_CPG	48150820	48151820	3.74	Promoter (<=1kb)	6
IGKV6D-41	-1.86	0.00143	0.0387	ENSG00000211626.2	ENST00000390271.2	0	no_CPG	90068928	90069928	3.94	Promoter (<=1kb)	2
RNA5SP234	-1.86	0.00153	0.0398	ENSG00000200786.1	ENST00000363916.1	37650	no_CPG	79691759	79692759	3.5	Distal Intergenic	7
ATP6AP1L	-1.85	1.52e-05	0.00385	ENSG00000205464.11	ENST00000502523.1	3668	no_CPG	82386613	82387613	4.65	Exon (ENST00000508366.5/ENSG00000205464.11, exon 8 of 8)	5
DLG1	-1.85	2.31e-05	0.00517	ENSG00000075711.20	ENST00000419354.5	-67691	no_CPG	197366991	197367991	5.16	Distal Intergenic	3
MRPL33	-1.85	2.58e-05	0.00551	ENSG00000243147.7	ENST00000379666.7	-9584	no_CPG	27761133	27762133	5.21	Distal Intergenic	2
RP5-881P19.7	-1.85	7.97e-05	0.0107	ENSG00000276255.2	ENST00000623471.1	32418	no_CPG	228043132	228044132	3.97	Intron (ENST00000284523.1/ENSG00000154342.5, intron 2 of 3)	1
LINC01229	-1.85	0.000134	0.0139	ENSG00000260876.5	ENST00000563360.5	-22068	no_CPG	79653040	79654040	4.25	Distal Intergenic	16
AC093822.1	-1.85	0.000167	0.0157	ENSG00000235009.1	ENST00000457385.1	11437	no_CPG	38442731	38443731	4.45	Intron (ENST00000417039.5/ENSG00000231367.5, intron 4 of 4)	2
MRPS21P8	-1.85	0.000452	0.0253	ENSG00000259978.1	ENST00000569196.1	-15413	no_CPG	49748041	49749041	4.3	Intron (ENST00000561648.5/ENSG00000102935.11, intron 3 of 8)	16
RUSC2	-1.85	0.000455	0.0253	ENSG00000198853.11	ENST00000361226.7	7897	no_CPG	35498024	35499024	3.3	Intron (ENST00000361226.7/ENSG00000198853.11, intron 1 of 11)	9
RP11-510P12.1	-1.85	0.000933	0.0328	ENSG00000271272.1	ENST00000603420.1	67866	no_CPG	42861713	42862713	3.93	Distal Intergenic	12
RPL7AL2	-1.85	0.00203	0.0448	ENSG00000228210.1	ENST00000429405.1	5469	no_CPG	4584831	4585831	3.74	Distal Intergenic	20
RN7SKP133	-1.84	5.23e-05	0.00853	ENSG00000201715.1	ENST00000364845.1	-1225	no_CPG	17343391	17344391	4.2	Promoter (1-2kb)	5
UNC5B-AS1	-1.84	0.000189	0.0167	ENSG00000237512.6	ENST00000447119.2	-44917	no_CPG	71263145	71264145	3.98	Intron (ENST00000335350.10/ENSG00000107731.12, intron 1 of 16)	10
ARHGAP26	-1.84	0.000256	0.0195	ENSG00000145819.15	ENST00000477867.5	-1831	no_CPG	142900709	142901709	3.72	Promoter (1-2kb)	5
AC083864.3	-1.84	0.000348	0.0224	ENSG00000232930.1	ENST00000446024.1	7337	no_CPG	36036948	36037948	4.4	Intron (ENST00000446024.1/ENSG00000232930.1, intron 3 of 3)	7
RP1-166H4.2	-1.84	0.000391	0.0237	ENSG00000261080.1	ENST00000563807.1	55647	no_CPG	45520123	45521123	4.36	Intron (ENST00000483377.5/ENSG00000124813.20, intron 6 of 7)	6
RPSAP3	-1.84	0.000582	0.0273	ENSG00000242952.1	ENST00000464073.1	-4982	no_CPG	76640643	76641643	3.65	Intron (ENST00000554926.1/ENSG00000259124.1, intron 1 of 3)	14
RP11-813F20.2	-1.84	0.000684	0.0292	ENSG00000267674.1	ENST00000591105.1	17573	no_CPG	49723490	49724490	3.57	Distal Intergenic	18
RP11-1012E15.2	-1.84	0.000761	0.0303	ENSG00000259868.2	ENST00000612704.1	-6761	no_CPG	55888786	55889786	4.04	Distal Intergenic	14
COX5BP2	-1.84	0.000915	0.0326	ENSG00000213111.5	ENST00000392354.4	71467	no_CPG	135962419	135963419	3.39	Intron (ENST00000308191.10/ENSG00000171408.13, intron 2 of 12)	6
MIR1260B	-1.84	0.00111	0.0356	ENSG00000266192.3	ENST00000582890.3	-31611	no_CPG	96308827	96309827	3.3	Intron (ENST00000524717.5/ENSG00000184384.13, intron 1 of 4)	11
OSBPL6	-1.84	0.0014	0.0385	ENSG00000079156.16	ENST00000190611.8	30121	no_CPG	178224770	178225770	3.63	Intron (ENST00000392505.6/ENSG00000079156.16, intron 1 of 25)	2
PAQR5	-1.84	0.00167	0.0414	ENSG00000137819.13	ENST00000561153.5	2399	no_CPG	69316802	69317802	3.29	Promoter (2-3kb)	15
RNU6-660P	-1.83	1.43e-06	0.000703	ENSG00000201436.1	ENST00000364566.1	-49832	no_CPG	16991783	16992783	5.45	Distal Intergenic	5
CREB5	-1.83	4.21e-05	0.00764	ENSG00000146592.16	ENST00000461921.5	2551	no_CPG	28572989	28573989	4.51	Promoter (2-3kb)	7
ZNF619P1	-1.83	0.000565	0.0271	ENSG00000224547.1	ENST00000446539.1	15554	no_CPG	46160491	46161491	3.99	Distal Intergenic	7
HMGN3P1	-1.83	0.000703	0.0293	ENSG00000183586.8	ENST00000453847.2	-5903	no_CPG	152392674	152393674	4.15	Intron (ENST00000630125.2/ENSG00000237975.6, intron 2 of 2)	1
AFG3L2	-1.83	0.00073	0.0298	ENSG00000141385.9	ENST00000588893.1	10560	no_CPG	12336768	12337768	4.04	3' UTR	18
RP11-342D11.3	-1.83	0.000747	0.03	ENSG00000233387.1	ENST00000414308.1	-28878	no_CPG	33145550	33146550	5.32	Distal Intergenic	10
LL22NC03-86D4.1	-1.83	0.0011	0.0354	ENSG00000236052.1	ENST00000412218.1	-45158	no_CPG	33971315	33972315	3.93	Distal Intergenic	22
RN7SKP219	-1.83	0.00119	0.0364	ENSG00000252634.1	ENST00000516825.1	-52497	no_CPG	21731795	21732795	3.3	Intron (ENST00000631589.1/ENSG00000078403.16, intron 17 of 22)	10
snoU13	-1.83	0.00145	0.039	ENSG00000238804.1	ENST00000459483.1	-4415	no_CPG	48961168	48962168	3.28	Exon (ENST00000357424.2/ENSG00000159224.4, exon 4 of 6)	17
NDUFAF6	-1.83	0.00159	0.0404	ENSG00000156170.12	ENST00000521063.1	377	no_CPG	95100771	95101771	3.49	Promoter (<=1kb)	8
FHL2	-1.83	0.0016	0.0405	ENSG00000115641.18	ENST00000409177.5	-9756	no_CPG	105409423	105410423	4.53	Intron (ENST00000393352.7/ENSG00000115641.18, intron 1 of 5)	2
RP11-19J5.1	-1.83	0.00164	0.041	ENSG00000259496.2	ENST00000560960.2	42402	no_CPG	69760644	69761644	5.01	Distal Intergenic	15
DEC1	-1.82	6.69e-05	0.00986	ENSG00000173077.14	ENST00000374016.5	22468	no_CPG	115164286	115165286	4.55	Intron (ENST00000374016.5/ENSG00000173077.14, intron 1 of 7)	9
RP5-945F2.1	-1.82	8.89e-05	0.0114	ENSG00000232975.1	ENST00000432182.1	9933	no_CPG	68107670	68108670	4.91	Intron (ENST00000424888.2/ENSG00000236531.2, intron 1 of 1)	7
LINC00511	-1.82	0.000151	0.0148	ENSG00000227036.6	ENST00000457958.6	19654	no_CPG	72571686	72572686	4.55	Intron (ENST00000581801.5/ENSG00000227036.6, intron 1 of 2)	17
NELL1	-1.82	0.00025	0.0192	ENSG00000165973.18	ENST00000528046.5	-6511	no_CPG	20761714	20762714	3.76	Intron (ENST00000325319.9/ENSG00000165973.18, intron 2 of 18)	11
PIPOX	-1.82	0.000311	0.0213	ENSG00000179761.11	ENST00000323372.8	-1885	no_CPG	29040015	29041015	4.25	Promoter (1-2kb)	17
MAGEF1	-1.82	0.000319	0.0216	ENSG00000177383.4	ENST00000317897.4	22742	no_CPG	184688260	184689260	3.97	Distal Intergenic	3
NXPH1	-1.82	0.000391	0.0237	ENSG00000122584.12	ENST00000497400.1	-51546	no_CPG	8637741	8638741	3.63	Intron (ENST00000405863.5/ENSG00000122584.12, intron 2 of 2)	7
RP11-112J1.3	-1.82	0.000687	0.0292	ENSG00000258734.2	ENST00000555790.2	12115	no_CPG	58815061	58816061	3.71	Distal Intergenic	14
AC006022.4	-1.82	0.000715	0.0295	ENSG00000223419.1	ENST00000425261.1	1736	no_CPG	30740082	30741082	3.96	Promoter (1-2kb)	7
CERS5	-1.82	0.000969	0.0336	ENSG00000139624.12	ENST00000422340.6	-2414	no_CPG	50169947	50170947	2.82	Promoter (2-3kb)	12
RP1-72E17.2	-1.82	0.00102	0.0345	ENSG00000270477.1	ENST00000605153.1	-3138	no_CPG	3697213	3698213	3.07	Distal Intergenic	6
ELMOD1	-1.82	0.00106	0.035	ENSG00000110675.12	ENST00000534236.1	11299	no_CPG	107664735	107665735	3.7	3' UTR	11
SNORA40	-1.82	0.0012	0.0366	ENSG00000212455.1	ENST00000391153.1	-169217	no_CPG	18209950	18210950	4.3	Intron (ENST00000465292.5/ENSG00000170745.11, intron 3 of 4)	2
RP3-393E18.2	-1.82	0.00136	0.0381	ENSG00000237927.1	ENST00000430078.1	-5197	no_CPG	159594366	159595366	4.43	Distal Intergenic	6
SYT16	-1.82	0.00182	0.0429	ENSG00000139973.16	ENST00000554436.1	-2585	no_CPG	61861295	61862295	3.48	Promoter (2-3kb)	14
PRR5L	-1.82	0.00186	0.0431	ENSG00000135362.13	ENST00000530627.1	14174	no_CPG	36469463	36470463	3.85	Distal Intergenic	11
F11R	-1.82	0.00191	0.0436	ENSG00000158769.17	ENST00000472573.5	4274	no_CPG	160995903	160996903	3.48	3' UTR	1
PRKCH	-1.81	2.87e-05	0.006	ENSG00000027075.13	ENST00000557585.5	-1298	no_CPG	61388396	61389396	5.42	Promoter (1-2kb)	14
CTA-503F6.2	-1.81	5.3e-05	0.00863	ENSG00000238195.1	ENST00000427360.1	3626	no_CPG	27207837	27208837	4.73	Distal Intergenic	22
EIF3H	-1.81	8.8e-05	0.0114	ENSG00000147677.10	ENST00000520289.1	97060	no_CPG	116559715	116560715	5.05	Distal Intergenic	8
NXPE2	-1.81	9.7e-05	0.0118	ENSG00000204361.8	ENST00000389586.4	167658	no_CPG	114846044	114847044	4.02	Distal Intergenic	11
RN7SL309P	-1.81	0.000129	0.0136	ENSG00000239356.3	ENST00000491364.3	0	no_CPG	65695507	65696507	5.02	Promoter (<=1kb)	11
RP11-960B9.2	-1.81	0.000131	0.0137	ENSG00000262231.1	ENST00000571062.1	25422	no_CPG	6163441	6164441	3.95	Distal Intergenic	17
EXOSC7	-1.81	0.000215	0.0179	ENSG00000075914.12	ENST00000459856.1	0	no_CPG	45010669	45011669	3.69	Promoter (<=1kb)	3
PITPNB	-1.81	0.000512	0.0259	ENSG00000180957.17	ENST00000465179.1	15089	no_CPG	27880613	27881613	4.22	Intron (ENST00000335272.9/ENSG00000180957.17, intron 7 of 11)	22
ATP5G2	-1.81	0.000626	0.0281	ENSG00000135390.17	ENST00000550241.1	9554	no_CPG	53658658	53659658	4.77	Intron (ENST00000550241.1/ENSG00000135390.17, intron 1 of 1)	12
FTCDNL1	-1.81	0.000931	0.0328	ENSG00000226124.6	ENST00000420922.6	51267	no_CPG	199798606	199799606	3.91	Intron (ENST00000416668.5/ENSG00000226124.6, intron 3 of 3)	2
PIGX	-1.81	0.000979	0.0338	ENSG00000163964.13	ENST00000426755.5	26058	no_CPG	196665833	196666833	4.73	Intron (ENST00000426755.5/ENSG00000163964.13, intron 2 of 5)	3
RNU7-187P	-1.81	0.00113	0.0357	ENSG00000238998.1	ENST00000458985.1	36386	no_CPG	113013739	113014739	4.03	Intron (ENST00000621518.4/ENSG00000149294.16, intron 2 of 19)	11
KCNN3	-1.81	0.00124	0.037	ENSG00000143603.18	ENST00000361147.8	67537	no_CPG	154791306	154792306	3.7	Intron (ENST00000271915.8/ENSG00000143603.18, intron 2 of 7)	1
CREBBP	-1.81	0.00128	0.0374	ENSG00000005339.14	ENST00000635899.1	-6762	no_CPG	3819739	3820739	3.91	Intron (ENST00000262367.9/ENSG00000005339.14, intron 2 of 30)	16
RP11-56F10.3	-1.81	0.00138	0.0384	ENSG00000254396.1	ENST00000522960.1	-21140	no_CPG	27080490	27081490	4.43	Distal Intergenic	9
RNA5SP237	-1.81	0.00157	0.0401	ENSG00000222346.1	ENST00000410414.1	22019	no_CPG	111930746	111931746	4.67	Intron (ENST00000428084.5/ENSG00000128512.19, intron 12 of 52)	7
RP11-146I2.1	-1.81	0.0017	0.0416	ENSG00000234261.3	ENST00000437648.1	15937	no_CPG	15073066	15074066	4.33	Intron (ENST00000437648.1/ENSG00000234261.3, intron 2 of 3)	6
MEX3C	-1.81	0.00209	0.0454	ENSG00000176624.10	ENST00000591040.1	-17595	no_CPG	51235899	51236899	3.97	Distal Intergenic	18
LINC01588	-1.81	0.0021	0.0454	ENSG00000214900.9	ENST00000556130.1	9742	no_CPG	49949920	49950920	3.71	Intron (ENST00000556434.5/ENSG00000214900.9, intron 2 of 4)	14
CACNA2D1	-1.81	0.00225	0.0466	ENSG00000153956.15	ENST00000461275.1	-119532	no_CPG	82204368	82205368	4.14	Intron (ENST00000356860.7/ENSG00000153956.15, intron 3 of 38)	7
MS4A5	-1.8	4.39e-05	0.00778	ENSG00000166930.6	ENST00000300190.6	-451	no_CPG	60428138	60429138	4.31	Promoter (<=1kb)	11
BCAR3	-1.8	5.62e-05	0.00889	ENSG00000137936.16	ENST00000370243.1	10611	no_CPG	93669759	93670759	4.69	Intron (ENST00000260502.10/ENSG00000137936.16, intron 2 of 11)	1
FAM212B	-1.8	0.000185	0.0165	ENSG00000197852.9	ENST00000527660.1	3340	no_CPG	111743359	111744359	4	Intron (ENST00000430373.1/ENSG00000227811.2, intron 1 of 2)	1
RP11-7F17.5	-1.8	0.000218	0.018	ENSG00000246548.3	ENST00000500215.3	4210	no_CPG	77045274	77046274	3.89	Intron (ENST00000500215.3/ENSG00000246548.3, intron 1 of 3)	14
RP11-89K21.1	-1.8	0.00202	0.0448	ENSG00000259439.2	ENST00000560399.1	4034	no_CPG	44918005	44919005	4.02	Downstream (2-3kb)	2
MAML3	-1.8	0.00241	0.0479	ENSG00000196782.12	ENST00000398940.1	-60148	no_CPG	139950200	139951200	3.62	Intron (ENST00000509479.6/ENSG00000196782.12, intron 1 of 4)	4
DNAI2	-1.8	0.00255	0.049	ENSG00000171595.13	ENST00000579490.5	886	no_CPG	74282398	74283398	3.74	Promoter (<=1kb)	17
LINC00589	-1.79	2.24e-05	0.00508	ENSG00000251191.7	ENST00000518623.5	38666	no_CPG	29695557	29696557	5.06	Intron (ENST00000518623.5/ENSG00000251191.7, intron 2 of 3)	8
RP1-166H4.2	-1.79	4.45e-05	0.00784	ENSG00000261080.1	ENST00000563807.1	9252	no_CPG	45566518	45567518	4.72	Intron (ENST00000576263.5/ENSG00000124813.20, intron 6 of 6)	6
TGFBR3	-1.79	6.48e-05	0.00973	ENSG00000069702.10	ENST00000533089.5	-10221	no_CPG	91872267	91873267	4.36	Intron (ENST00000212355.8/ENSG00000069702.10, intron 1 of 16)	1
CASC20	-1.79	0.000144	0.0144	ENSG00000229876.1	ENST00000415932.1	54015	no_CPG	6500738	6501738	4.26	Intron (ENST00000415932.1/ENSG00000229876.1, intron 2 of 2)	20
RP11-267A15.3	-1.79	0.000164	0.0155	ENSG00000250256.1	ENST00000505567.1	-8553	no_CPG	174608611	174609611	4.27	Distal Intergenic	5
C20orf197	-1.79	0.000212	0.0179	ENSG00000176659.7	ENST00000625080.1	6780	no_CPG	60062705	60063705	3.67	Intron (ENST00000625080.1/ENSG00000176659.7, intron 2 of 3)	20
AC005008.2	-1.79	0.000296	0.0209	ENSG00000237896.6	ENST00000431501.5	-19137	no_CPG	81155371	81156371	4.44	Distal Intergenic	7
LINC01033	-1.79	0.000356	0.0226	ENSG00000249069.7	ENST00000512618.5	-220	no_CPG	54389618	54390618	4.36	Promoter (<=1kb)	5
MAFTRR	-1.79	0.000601	0.0277	ENSG00000261390.5	ENST00000568389.1	10635	no_CPG	79758666	79759666	3.82	Intron (ENST00000561510.5/ENSG00000260876.5, intron 2 of 5)	16
TOM1L2	-1.79	0.00105	0.0349	ENSG00000175662.17	ENST00000577794.1	0	no_CPG	17848797	17849797	3.54	Promoter (<=1kb)	17
RP11-874J12.4	-1.79	0.00111	0.0355	ENSG00000266401.1	ENST00000577848.1	21725	no_CPG	3675135	3676135	5.01	Intron (ENST00000400147.6/ENSG00000170579.15, intron 4 of 9)	18
LINC01411	-1.79	0.00122	0.0368	ENSG00000249306.5	ENST00000510234.5	18423	no_CPG	174354918	174355918	3.9	Intron (ENST00000515513.5/ENSG00000249306.5, intron 1 of 4)	5
CTD-3060P21.1	-1.79	0.00132	0.0379	ENSG00000262884.1	ENST00000574885.1	72639	no_CPG	2892256	2893256	3.89	Intron (ENST00000637138.1/ENSG00000132359.14, intron 3 of 25)	17
CTD-2509G16.5	-1.79	0.00169	0.0416	ENSG00000258760.1	ENST00000555736.1	11136	no_CPG	65290544	65291544	4.95	Intron (ENST00000555736.1/ENSG00000258760.1, intron 1 of 3)	14
COX6B1P7	-1.79	0.00176	0.0422	ENSG00000225242.2	ENST00000430845.2	-12044	no_CPG	68269344	68270344	3.62	Distal Intergenic	1
AC018737.3	-1.79	0.00197	0.0443	ENSG00000224655.5	ENST00000422649.1	1205	no_CPG	121791697	121792697	4.8	Promoter (1-2kb)	2
RP11-758M4.3	-1.79	0.00217	0.0459	ENSG00000253777.1	ENST00000523157.1	48928	no_CPG	74754883	74755883	4.42	Intron (ENST00000523442.5/ENSG00000254349.5, intron 5 of 6)	8
MAML2	-1.79	0.00218	0.0459	ENSG00000184384.13	ENST00000618849.1	-28776	no_CPG	96122296	96123296	3.96	Intron (ENST00000524717.5/ENSG00000184384.13, intron 1 of 4)	11
AC010082.2	-1.79	0.00223	0.0463	ENSG00000225000.1	ENST00000411797.1	30294	no_CPG	18399444	18400444	3.61	Intron (ENST00000417496.6/ENSG00000048052.21, intron 2 of 12)	7
RP11-417E7.2	-1.79	0.00237	0.0477	ENSG00000261039.2	ENST00000564830.2	-5498	no_CPG	169188238	169189238	3.46	Distal Intergenic	6
CTA-929C8.5	-1.78	2.96e-06	0.00123	ENSG00000233574.1	ENST00000449126.1	-8605	no_CPG	27266635	27267635	5.16	Distal Intergenic	22
RNA5SP147	-1.78	4.38e-05	0.00778	ENSG00000252302.1	ENST00000516493.1	3902	no_CPG	176767135	176768135	5.06	Intron (ENST00000428516.1/ENSG00000232461.1, intron 2 of 4)	3
CTD-2643K12.1	-1.78	5.4e-05	0.00868	ENSG00000258895.1	ENST00000555663.1	-6475	no_CPG	94026183	94027183	4.97	Intron (ENST00000556928.5/ENSG00000258754.7, intron 2 of 4)	15
RASL11B	-1.78	0.00021	0.0178	ENSG00000128045.6	ENST00000505041.1	8756	no_CPG	52872902	52873902	4.35	3' UTR	4
TGIF1	-1.78	0.000843	0.0316	ENSG00000177426.20	ENST00000547233.1	0	no_CPG	3412199	3413199	4	Promoter (<=1kb)	18
EPB41L4A	-1.78	0.000899	0.0325	ENSG00000129595.12	ENST00000514203.1	-21847	no_CPG	112329249	112330249	3.75	Intron (ENST00000621003.4/ENSG00000129595.12, intron 1 of 22)	5
MERTK	-1.78	0.00154	0.0399	ENSG00000153208.16	ENST00000449344.2	13774	no_CPG	112033187	112034187	4.31	Distal Intergenic	2
CCDC97	-1.78	0.00163	0.0409	ENSG00000142039.3	ENST00000600918.1	1771	no_CPG	41321504	41322504	4.17	Promoter (1-2kb)	19
LINC01271	-1.77	8.87e-06	0.00266	ENSG00000233077.1	ENST00000441214.1	-12145	no_CPG	50333487	50334487	4.73	Distal Intergenic	20
MTHFD1	-1.77	1.41e-05	0.00364	ENSG00000100714.15	ENST00000554057.5	-8195	no_CPG	64410008	64411008	5.22	Intron (ENST00000545908.5/ENSG00000100714.15, intron 2 of 26)	14
RPS17P2	-1.77	3.99e-05	0.00739	ENSG00000197575.6	ENST00000461663.1	-63226	no_CPG	116652017	116653017	4.43	Distal Intergenic	5
CMTM6	-1.77	7.48e-05	0.0103	ENSG00000091317.7	ENST00000478886.1	17831	no_CPG	32469550	32470550	4.34	Intron (ENST00000487007.1/ENSG00000153551.13, intron 3 of 3)	3
DIRC3	-1.77	0.000118	0.0131	ENSG00000231672.6	ENST00000474063.5	-22034	no_CPG	217621966	217622966	4.19	Intron (ENST00000486365.5/ENSG00000231672.6, intron 1 of 10)	2
STX16	-1.77	0.00015	0.0148	ENSG00000124222.22	ENST00000361830.7	-5081	no_CPG	58645172	58646172	4.69	Distal Intergenic	20
NPM1P30	-1.77	0.000157	0.0152	ENSG00000228219.1	ENST00000425092.1	-12459	no_CPG	21097223	21098223	4.1	Intron (ENST00000417816.2/ENSG00000078114.18, intron 2 of 6)	10
PAICSP2	-1.77	0.00018	0.0162	ENSG00000228595.1	ENST00000429118.1	-74170	no_CPG	91536173	91537173	4.2	Distal Intergenic	9
FRMD3	-1.77	0.000294	0.0209	ENSG00000172159.15	ENST00000621208.4	34858	no_CPG	83431884	83432884	5.25	Intron (ENST00000376438.5/ENSG00000172159.15, intron 1 of 14)	9
MYO1E	-1.77	0.000951	0.0332	ENSG00000157483.8	ENST00000558182.5	6039	no_CPG	59199722	59200722	3.92	Intron (ENST00000288235.8/ENSG00000157483.8, intron 16 of 27)	15
RP11-326I11.4	-1.77	0.00173	0.0419	ENSG00000271538.5	ENST00000605270.5	7593	no_CPG	184528961	184529961	3.35	Intron (ENST00000605270.5/ENSG00000271538.5, intron 1 of 2)	4
RP11-61A14.1	-1.76	5.58e-05	0.00889	ENSG00000258122.1	ENST00000551187.1	-5310	no_CPG	66858758	66859758	4.46	Intron (ENST00000561579.6/ENSG00000159593.14, intron 1 of 8)	16
Y_RNA	-1.76	0.000169	0.0157	ENSG00000252742.1	ENST00000516933.1	2132	no_CPG	128347795	128348795	4.14	Promoter (2-3kb)	2
RP11-497K15.1	-1.76	0.000364	0.0228	ENSG00000228373.2	ENST00000454946.2	-47279	no_CPG	87375355	87376355	4.58	Distal Intergenic	9
LIMCH1	-1.76	0.00051	0.0259	ENSG00000064042.17	ENST00000514096.5	0	no_CPG	41612201	41613201	3.72	Promoter (<=1kb)	4
RP11-244F12.1	-1.76	0.000735	0.0298	ENSG00000259394.2	ENST00000560358.2	32251	no_CPG	62985424	62986424	4.15	Distal Intergenic	15
BMP7	-1.76	0.00103	0.0347	ENSG00000101144.12	ENST00000476877.1	4615	no_CPG	57167974	57168974	4.15	3' UTR	20
LINC01519	-1.76	0.00123	0.037	ENSG00000237267.1	ENST00000454178.1	72746	no_CPG	85124212	85125212	3.5	Distal Intergenic	10
TRIM2	-1.76	0.00149	0.0394	ENSG00000109654.14	ENST00000338700.9	994	no_CPG	153205460	153206460	3.34	Promoter (<=1kb)	4
CTD-2308B18.3	-1.76	0.00184	0.0429	ENSG00000248296.1	ENST00000503145.1	6810	no_CPG	124528538	124529538	3.99	Intron (ENST00000503145.1/ENSG00000248296.1, intron 1 of 2)	5
PITPNC1	-1.76	0.00197	0.0443	ENSG00000154217.14	ENST00000581923.5	-3327	no_CPG	67528578	67529578	3.91	Intron (ENST00000299954.13/ENSG00000154217.14, intron 1 of 8)	17
SPA17P1	-1.76	0.00242	0.0479	ENSG00000236797.1	ENST00000416656.1	29435	no_CPG	75352409	75353409	3.72	Intron (ENST00000524517.5/ENSG00000226051.6, intron 4 of 5)	10
PTGER2	-1.75	5.21e-05	0.00853	ENSG00000125384.6	ENST00000245457.5	28183	no_CPG	52342578	52343578	4.45	Distal Intergenic	14
MRPL46	-1.75	9e-05	0.0115	ENSG00000259494.1	ENST00000559538.1	81508	no_CPG	88382305	88383305	4.58	Distal Intergenic	15
SEMA3F	-1.75	0.000103	0.0121	ENSG00000001617.11	ENST00000434342.5	4795	no_CPG	50163814	50164814	4.58	Intron (ENST00000414301.5/ENSG00000001617.11, intron 2 of 7)	3
PITX2	-1.75	0.000104	0.0121	ENSG00000164093.15	ENST00000511837.5	-21291	no_CPG	110663414	110664414	3.96	Distal Intergenic	4
AL356053.1	-1.75	0.000128	0.0136	ENSG00000150076.23	ENST00000302316.11	-4076	no_CPG	32680893	32681893	5.88	Intron (ENST00000375025.9/ENSG00000150076.23, intron 3 of 22)	10
EXTL3	-1.75	0.00034	0.0222	ENSG00000012232.8	ENST00000454906.6	25487	no_CPG	28656919	28657919	5.29	Intron (ENST00000522725.5/ENSG00000012232.8, intron 2 of 4)	8
APP	-1.75	0.000506	0.0258	ENSG00000142192.20	ENST00000462267.1	-3753	no_CPG	26115836	26116836	3.85	Intron (ENST00000346798.7/ENSG00000142192.20, intron 1 of 17)	21
AC125238.2	-1.75	0.000759	0.0303	ENSG00000233459.1	ENST00000430003.1	-13500	no_CPG	203649516	203650516	3.86	Distal Intergenic	2
RASGRF2	-1.75	0.000798	0.0309	ENSG00000113319.11	ENST00000265080.8	-2788	no_CPG	80956884	80957884	3.71	Promoter (2-3kb)	5
PRELP	-1.75	0.00146	0.0391	ENSG00000188783.5	ENST00000343110.2	-34377	no_CPG	203440451	203441451	3.79	Distal Intergenic	1
RP11-360K13.2	-1.75	0.00194	0.044	ENSG00000255376.1	ENST00000529375.1	-84275	no_CPG	96727500	96728500	3.11	Distal Intergenic	11
DOCK4	-1.75	0.00205	0.0449	ENSG00000128512.19	ENST00000486186.5	-16257	no_CPG	111756471	111757471	3.79	Intron (ENST00000423057.6/ENSG00000128512.19, intron 25 of 35)	7
RNU6-754P	-1.75	0.00215	0.0458	ENSG00000212468.1	ENST00000391166.1	26248	no_CPG	46044993	46045993	3.66	Intron (ENST00000185206.10/ENSG00000112782.15, intron 1 of 5)	6
RNU2-46P	-1.75	0.00259	0.0493	ENSG00000252847.1	ENST00000517038.1	-36278	no_CPG	95822626	95823626	4.09	Intron (ENST00000433656.2/ENSG00000175611.11, intron 1 of 3)	9
FUT8	-1.74	0.000289	0.0208	ENSG00000033170.16	ENST00000554667.1	14188	no_CPG	65502506	65503506	4.01	Intron (ENST00000360689.9/ENSG00000033170.16, intron 2 of 10)	14
CCR7	-1.74	0.000569	0.0271	ENSG00000126353.3	ENST00000579344.1	12669	no_CPG	40547344	40548344	4.5	Distal Intergenic	17
CPOX	-1.74	0.000697	0.0292	ENSG00000080819.6	ENST00000512905.5	0	no_CPG	98584837	98585837	4.41	Promoter (<=1kb)	3
ITGA8	-1.74	0.000824	0.0314	ENSG00000077943.7	ENST00000477064.1	85344	no_CPG	15517926	15518926	4.76	Intron (ENST00000378076.3/ENSG00000077943.7, intron 29 of 29)	10
RP11-454P21.1	-1.74	0.000906	0.0326	ENSG00000249937.5	ENST00000511596.5	-4183	no_CPG	17679401	17680401	5.24	Distal Intergenic	5
KRT18P16	-1.74	0.000978	0.0337	ENSG00000235275.3	ENST00000510337.1	80737	no_CPG	123716847	123717847	4.57	Distal Intergenic	5
LINC01227	-1.74	0.00166	0.0411	ENSG00000260737.5	ENST00000561719.5	-10250	no_CPG	80583058	80584058	4.13	Distal Intergenic	16
ILDR2	-1.74	0.00184	0.0429	ENSG00000143195.12	ENST00000271417.7	22250	no_CPG	166952074	166953074	4.14	Intron (ENST00000271417.7/ENSG00000143195.12, intron 3 of 9)	1
CTA-286B10.7	-1.74	0.0019	0.0436	ENSG00000282602.1	ENST00000632196.1	-12150	no_CPG	35359024	35360024	4.33	Distal Intergenic	22
AC108142.1	-1.74	0.00249	0.0484	ENSG00000177822.7	ENST00000505873.1	16741	no_CPG	182126035	182127035	3.5	Intron (ENST00000509012.5/ENSG00000177822.7, intron 1 of 4)	4
RP11-874J12.3	-1.73	1.24e-05	0.0033	ENSG00000266513.1	ENST00000584060.1	-19140	no_CPG	3790570	3791570	5.04	Intron (ENST00000400147.6/ENSG00000170579.15, intron 2 of 9)	18
AC092155.4	-1.73	5.64e-05	0.00889	ENSG00000226622.5	ENST00000416111.1	7547	no_CPG	62654081	62655081	4.51	Intron (ENST00000444672.5/ENSG00000226622.5, intron 2 of 3)	2
PRKCH	-1.73	5.69e-05	0.0089	ENSG00000027075.13	ENST00000555185.5	-38831	no_CPG	61147728	61148728	5.22	Distal Intergenic	14
SEMA3C	-1.73	0.000184	0.0165	ENSG00000075223.13	ENST00000475955.1	16034	no_CPG	80781204	80782204	4.71	Intron (ENST00000265361.7/ENSG00000075223.13, intron 12 of 17)	7
SSUH2	-1.73	0.000203	0.0174	ENSG00000125046.14	ENST00000415132.5	0	no_CPG	8657995	8658995	4.84	Promoter (<=1kb)	3
LINC01332	-1.73	0.000249	0.0192	ENSG00000250446.1	ENST00000506612.1	-26600	no_CPG	74361366	74362366	4.78	Distal Intergenic	5
MSR1	-1.73	0.000342	0.0223	ENSG00000038945.14	ENST00000517522.1	-25611	no_CPG	16408939	16409939	4.06	Intron (ENST00000518026.5/ENSG00000038945.14, intron 2 of 5)	8
ARL2BPP6	-1.73	0.000437	0.025	ENSG00000248355.1	ENST00000512757.1	-59818	no_CPG	175229913	175230913	4.02	Distal Intergenic	5
RP11-350G8.9	-1.73	0.000502	0.0258	ENSG00000273110.1	ENST00000607963.1	-4472	no_CPG	154474540	154475540	4.22	Intron (ENST00000486773.1/ENSG00000169291.9, intron 1 of 1)	1
RP11-1L9.1	-1.73	0.000735	0.0298	ENSG00000226434.1	ENST00000446964.1	0	no_CPG	13376556	13377556	3.78	Promoter (<=1kb)	23
TFDP2	-1.73	0.000842	0.0316	ENSG00000114126.17	ENST00000467634.1	8542	no_CPG	142116828	142117828	3.77	Intron (ENST00000489671.5/ENSG00000114126.17, intron 1 of 12)	3
RP11-93M12.1	-1.73	0.0014	0.0385	ENSG00000250624.1	ENST00000513621.1	29883	no_CPG	30854299	30855299	4.18	Intron (ENST00000511884.6/ENSG00000169851.15, intron 1 of 2)	4
AC007392.3	-1.73	0.00191	0.0436	ENSG00000232046.6	ENST00000433396.5	-4096	no_CPG	66568934	66569934	3.57	3' UTR	2
SYT14	-1.73	0.00238	0.0478	ENSG00000143469.17	ENST00000367019.5	-11455	no_CPG	209925719	209926719	3.9	Distal Intergenic	1
SARS	-1.73	0.00263	0.0498	ENSG00000031698.12	ENST00000234677.6	-4257	no_CPG	109208661	109209661	3.65	Distal Intergenic	1
RP5-1086K13.1	-1.72	4.98e-05	0.00827	ENSG00000224950.2	ENST00000456414.2	-9456	no_CPG	116508668	116509668	4.59	Distal Intergenic	1
RP4-706G24.1	-1.72	0.000262	0.0197	ENSG00000231953.2	ENST00000455902.2	-40052	no_CPG	25167087	25168087	4.83	Distal Intergenic	1
RP11-472F21.1	-1.72	0.000581	0.0273	ENSG00000274970.1	ENST00000619978.1	7850	no_CPG	12431554	12432554	3.37	Distal Intergenic	7
FLNB	-1.72	0.000664	0.029	ENSG00000136068.14	ENST00000429972.6	29975	no_CPG	58038375	58039375	4.06	Intron (ENST00000490882.5/ENSG00000136068.14, intron 1 of 46)	3
RRM2	-1.72	0.000909	0.0326	ENSG00000171848.13	ENST00000485717.1	5503	no_CPG	10132333	10133333	3.69	Distal Intergenic	2
VMP1	-1.72	0.00123	0.037	ENSG00000062716.11	ENST00000591877.1	-9211	no_CPG	59763543	59764543	4.26	Intron (ENST00000262291.8/ENSG00000062716.11, intron 5 of 11)	17
RN7SL448P	-1.72	0.00239	0.0478	ENSG00000264322.2	ENST00000475566.3	34296	no_CPG	60934187	60935187	3.95	Intron (ENST00000589222.5/ENSG00000141376.21, intron 13 of 25)	17
PCSK5	-1.71	0.000215	0.0179	ENSG00000099139.13	ENST00000424854.6	-101849	no_CPG	75993128	75994128	4.65	Intron (ENST00000545128.5/ENSG00000099139.13, intron 3 of 36)	9
DRD1	-1.71	0.000298	0.0209	ENSG00000184845.3	ENST00000393752.2	60233	no_CPG	175382975	175383975	3.99	Distal Intergenic	5
LINC01449	-1.71	0.000368	0.023	ENSG00000224017.1	ENST00000440213.1	272346	no_CPG	41373950	41374950	4.21	Distal Intergenic	7
RP11-1029M24.1	-1.71	0.000469	0.0253	ENSG00000236768.1	ENST00000444020.1	-9090	no_CPG	48130305	48131305	4.3	Distal Intergenic	3
RP11-20L19.1	-1.71	0.000473	0.0254	ENSG00000257787.1	ENST00000549669.1	48700	no_CPG	90857976	90858976	4.1	Distal Intergenic	12
RP11-20P5.2	-1.71	0.000553	0.0269	ENSG00000229060.4	ENST00000478520.2	41875	no_CPG	28190086	28191086	4.39	Intron (ENST00000379992.6/ENSG00000174482.10, intron 4 of 5)	9
GPAT2	-1.71	0.000746	0.03	ENSG00000186281.12	ENST00000488515.1	-28365	no_CPG	96067816	96068816	3.99	Distal Intergenic	2
RP11-398E10.1	-1.71	0.000758	0.0303	ENSG00000258998.1	ENST00000556405.1	0	no_CPG	44782599	44783599	4.47	Promoter (<=1kb)	14
AC013401.1	-1.71	0.000895	0.0324	ENSG00000229395.1	ENST00000414394.1	-128375	no_CPG	192500544	192501544	3.82	Distal Intergenic	2
PPP3CA	-1.71	0.00136	0.0381	ENSG00000138814.16	ENST00000510292.1	42626	no_CPG	101114693	101115693	4.58	Intron (ENST00000512215.5/ENSG00000138814.16, intron 2 of 7)	4
Y_RNA	-1.71	0.00161	0.0406	ENSG00000201426.1	ENST00000364556.1	46014	no_CPG	110773035	110774035	3.76	Distal Intergenic	3
DIRC3	-1.71	0.00171	0.0417	ENSG00000231672.6	ENST00000474063.5	25695	no_CPG	217573237	217574237	3.69	Intron (ENST00000474063.5/ENSG00000231672.6, intron 1 of 11)	2
RP5-881L22.5	-1.71	0.00174	0.042	ENSG00000226812.2	ENST00000430481.2	0	no_CPG	44351572	44352572	3.08	Promoter (<=1kb)	20
RP11-133K1.1	-1.71	0.0018	0.0426	ENSG00000244705.1	ENST00000471253.1	-369	no_CPG	40313658	40314658	4.44	Promoter (<=1kb)	15
RP11-285B24.1	-1.71	0.00229	0.047	ENSG00000243903.1	ENST00000497258.1	142335	no_CPG	59245369	59246369	4.77	Distal Intergenic	3
ACTB	-1.71	0.00245	0.0482	ENSG00000075624.13	ENST00000464611.1	3617	no_CPG	5523481	5524481	4.47	Downstream (2-3kb)	7
CTD-2124B20.3	-1.7	2.92e-05	0.00605	ENSG00000265174.1	ENST00000582386.1	8437	no_CPG	6566259	6567259	5.13	Intron (ENST00000584361.1/ENSG00000265944.1, intron 2 of 5)	18
AC016903.2	-1.7	0.000192	0.0169	ENSG00000237843.1	ENST00000456384.1	15933	no_CPG	204491289	204492289	4.14	Intron (ENST00000456384.1/ENSG00000237843.1, intron 1 of 1)	2
RP11-4G2.1	-1.7	0.000263	0.0197	ENSG00000259348.1	ENST00000561051.1	19972	no_CPG	96025958	96026958	4.04	Intron (ENST00000619812.1/ENSG00000275443.1, intron 1 of 3)	15
RP11-343K8.3	-1.7	0.000613	0.0279	ENSG00000264914.1	ENST00000579285.1	0	no_CPG	57911680	57912680	4.8	Promoter (<=1kb)	17
PDGFB	-1.7	0.00164	0.041	ENSG00000100311.16	ENST00000381551.8	3808	no_CPG	39236101	39237101	3.82	Intron (ENST00000331163.10/ENSG00000100311.16, intron 1 of 6)	22
CFL1P4	-1.7	0.0017	0.0416	ENSG00000213026.4	ENST00000451536.2	-2491	no_CPG	241989694	241990694	4.33	Promoter (2-3kb)	1
MCU	-1.7	0.00195	0.044	ENSG00000156026.14	ENST00000605597.5	1859	no_CPG	72694478	72695478	4.05	Promoter (1-2kb)	10
SLC47A1	-1.7	0.00196	0.0441	ENSG00000142494.13	ENST00000395585.5	497	CPG_ov	19534377	19535377	3.75	Promoter (<=1kb)	17
RP1-231P7P.1	-1.7	0.00203	0.0448	ENSG00000224027.1	ENST00000415655.1	-43286	no_CPG	27616859	27617859	4.25	Distal Intergenic	22
AC012075.1	-1.7	0.00204	0.0448	ENSG00000231722.1	ENST00000436549.1	-16727	no_CPG	81436029	81437029	3.88	Distal Intergenic	2
GRIN2B	-1.7	0.00227	0.0467	ENSG00000273079.5	ENST00000637875.1	115077	no_CPG	13863906	13864906	3.45	Intron (ENST00000609686.3/ENSG00000273079.5, intron 2 of 12)	12
FOXK1	-1.7	0.00242	0.0479	ENSG00000164916.10	ENST00000460979.2	-1391	no_CPG	4738468	4739468	3.76	Promoter (1-2kb)	7
HMGB1P31	-1.69	4.95e-05	0.00827	ENSG00000233266.1	ENST00000437242.1	-6620	no_CPG	54043714	54044714	5.21	Intron (ENST00000458030.3/ENSG00000170634.12, intron 2 of 4)	2
U3	-1.69	0.000123	0.0134	ENSG00000212610.2	ENST00000391308.2	-43316	no_CPG	218585215	218586215	4.53	Distal Intergenic	1
LINC00525	-1.69	0.000252	0.0193	ENSG00000146666.5	ENST00000412730.1	1812	no_CPG	47763288	47764288	4.41	Promoter (1-2kb)	7
RP1-273G13.1	-1.69	0.000378	0.0233	ENSG00000240738.1	ENST00000468681.1	-35097	no_CPG	33895320	33896320	4.04	Intron (ENST00000523063.5/ENSG00000253642.5, intron 3 of 5)	8
TMEM120B	-1.69	0.00046	0.0253	ENSG00000188735.12	ENST00000416147.6	-10007	no_CPG	121765256	121766256	4.38	Intron (ENST00000342607.10/ENSG00000188735.12, intron 6 of 12)	12
COL14A1	-1.69	0.000551	0.0269	ENSG00000187955.11	ENST00000440844.5	1072	no_CPG	120346518	120347518	4.38	Promoter (1-2kb)	8
MIR4499	-1.69	0.00141	0.0386	ENSG00000263978.1	ENST00000584834.1	82125	no_CPG	20350721	20351721	3.99	Distal Intergenic	13
TRIO	-1.69	0.00178	0.0424	ENSG00000038382.17	ENST00000515710.1	8141	no_CPG	14448960	14449960	4.29	Intron (ENST00000344204.8/ENSG00000038382.17, intron 34 of 56)	5
CEBPB-AS1	-1.69	0.00221	0.0461	ENSG00000277449.1	ENST00000613921.1	-34860	no_CPG	50226358	50227358	3.18	Distal Intergenic	20
SC22CB-1D7.1	-1.69	0.00234	0.0474	ENSG00000230741.1	ENST00000453924.1	13400	no_CPG	33334265	33335265	3.58	Intron (ENST00000608642.5/ENSG00000133424.20, intron 3 of 5)	22
SLC39A11	-1.69	0.00252	0.0487	ENSG00000133195.11	ENST00000579988.1	0	no_CPG	72725129	72726129	4.33	Promoter (<=1kb)	17
TMEM143	-1.68	9.89e-05	0.0118	ENSG00000161558.10	ENST00000601522.1	8364	no_CPG	48354310	48355310	4.18	Intron (ENST00000293261.7/ENSG00000161558.10, intron 3 of 7)	19
GNG2	-1.68	0.000439	0.025	ENSG00000186469.8	ENST00000553432.5	-1849	no_CPG	51823346	51824346	4.27	Promoter (1-2kb)	14
RN7SL518P	-1.68	0.000439	0.025	ENSG00000265486.2	ENST00000491887.3	91488	no_CPG	76149813	76150813	5.03	Intron (ENST00000611255.4/ENSG00000148655.14, intron 5 of 6)	10
RN7SL841P	-1.68	0.000456	0.0253	ENSG00000239555.3	ENST00000470547.3	115640	no_CPG	55175035	55176035	3.86	Distal Intergenic	16
SLC18A2	-1.68	0.000561	0.027	ENSG00000165646.11	ENST00000298472.9	-19098	no_CPG	117220995	117221995	5.18	Distal Intergenic	10
RGS6	-1.68	0.000609	0.0279	ENSG00000182732.16	ENST00000554300.1	-9339	no_CPG	72529723	72530723	3.66	Intron (ENST00000553525.5/ENSG00000182732.16, intron 15 of 17)	14
TG	-1.68	0.000704	0.0293	ENSG00000042832.11	ENST00000518108.1	0	no_CPG	133016859	133017859	5.01	Promoter (<=1kb)	8
RN7SKP137	-1.68	0.00111	0.0355	ENSG00000223006.1	ENST00000411074.1	7049	no_CPG	121053429	121054429	3.43	Intron (ENST00000379692.8/ENSG00000173376.13, intron 1 of 3)	4
LEFTY1	-1.68	0.00115	0.0358	ENSG00000243709.1	ENST00000272134.5	-1738	no_CPG	225890884	225891884	3.59	Promoter (1-2kb)	1
HIP1	-1.68	0.00164	0.041	ENSG00000127946.16	ENST00000485723.1	49906	no_CPG	75688029	75689029	3.57	Intron (ENST00000336926.10/ENSG00000127946.16, intron 1 of 30)	7
DPF3	-1.68	0.00184	0.0429	ENSG00000205683.11	ENST00000556902.5	34474	no_CPG	72801009	72802009	5.01	Intron (ENST00000556509.5/ENSG00000205683.11, intron 1 of 10)	14
RNU6-919P	-1.67	3.07e-05	0.00622	ENSG00000252540.1	ENST00000516731.1	-21870	no_CPG	49771941	49772941	4.78	Distal Intergenic	20
TNS3	-1.67	6.83e-05	0.00996	ENSG00000136205.16	ENST00000434451.1	9130	no_CPG	47571501	47572501	4.82	Intron (ENST00000311160.13/ENSG00000136205.16, intron 1 of 30)	7
ME3	-1.67	0.000291	0.0209	ENSG00000151376.16	ENST00000525957.1	-79494	no_CPG	86577618	86578618	4.52	Intron (ENST00000524610.1/ENSG00000254733.1, intron 2 of 2)	11
VWA8	-1.67	0.000338	0.0222	ENSG00000102763.16	ENST00000583027.1	2471	no_CPG	41564924	41565924	4.47	Promoter (2-3kb)	13
ULK4	-1.67	0.000391	0.0237	ENSG00000168038.10	ENST00000481226.1	-17305	no_CPG	41932779	41933779	4.07	Intron (ENST00000301831.8/ENSG00000168038.10, intron 4 of 36)	3
CTB-147N14.4	-1.67	0.00105	0.0349	ENSG00000269014.1	ENST00000597106.1	-706	no_CPG	46829146	46830146	3.91	Promoter (<=1kb)	19
CUL1P1	-1.67	0.00148	0.0393	ENSG00000251032.1	ENST00000509510.1	758	no_CPG	127785284	127786284	4.13	Promoter (<=1kb)	5
AC112715.2	-1.67	0.00163	0.0409	ENSG00000224132.2	ENST00000445534.2	-20620	no_CPG	237235471	237236471	3.66	Distal Intergenic	2
DGKB	-1.67	0.0021	0.0454	ENSG00000136267.13	ENST00000464065.1	210569	no_CPG	14507311	14508311	3.73	Intron (ENST00000399322.7/ENSG00000136267.13, intron 19 of 24)	7
RBMS1	-1.67	0.00218	0.0459	ENSG00000153250.18	ENST00000492283.1	8628	no_CPG	160308575	160309575	3.8	Intron (ENST00000474820.5/ENSG00000153250.18, intron 5 of 15)	2
AC073621.2	-1.67	0.00239	0.0478	ENSG00000227158.1	ENST00000381380.3	-8597	no_CPG	17413084	17414084	3.8	Distal Intergenic	17
AC073115.6	-1.66	9.32e-06	0.00275	ENSG00000237471.1	ENST00000416708.1	4179	no_CPG	45973836	45974836	5.22	Intron (ENST00000416708.1/ENSG00000237471.1, intron 1 of 2)	7
TRAK1	-1.66	0.000175	0.0159	ENSG00000182606.14	ENST00000484786.5	-5985	no_CPG	42080215	42081215	4.47	Intron (ENST00000487159.5/ENSG00000182606.14, intron 1 of 16)	3
LINC01332	-1.66	0.000215	0.0179	ENSG00000250446.1	ENST00000506612.1	-59970	no_CPG	74394736	74395736	5.14	Intron (ENST00000507781.1/ENSG00000248673.1, intron 2 of 2)	5
RP1-60O19.1	-1.66	0.000225	0.0182	ENSG00000235142.7	ENST00000606430.1	-11178	no_CPG	106798719	106799719	4.39	Distal Intergenic	6
SLC27A1	-1.66	0.000362	0.0227	ENSG00000130304.16	ENST00000600297.1	4823	no_CPG	17475361	17476361	4.25	Intron (ENST00000600277.5/ENSG00000130304.16, intron 2 of 5)	19
RP5-856G1.1	-1.66	0.000388	0.0236	ENSG00000270937.1	ENST00000603854.1	-11361	no_CPG	1038586	1039586	4.01	Distal Intergenic	6
ABTB2	-1.66	0.000599	0.0276	ENSG00000166016.5	ENST00000435224.2	-20890	no_CPG	34378898	34379898	4.17	Distal Intergenic	11
KRT75	-1.66	0.000788	0.0308	ENSG00000170454.5	ENST00000252245.5	0	no_CPG	52434054	52435054	3.9	Promoter (<=1kb)	12
PSTPIP2	-1.66	0.00113	0.0357	ENSG00000152229.18	ENST00000588801.5	-1980	no_CPG	46042267	46043267	4.58	Promoter (1-2kb)	18
SLC38A4	-1.66	0.00114	0.0358	ENSG00000139209.15	ENST00000546940.1	-53887	no_CPG	46886295	46887295	3.96	Distal Intergenic	12
C5orf67	-1.66	0.00233	0.0473	ENSG00000225940.5	ENST00000438651.5	-31601	no_CPG	56637833	56638833	4.31	Distal Intergenic	5
AC013399.3	-1.66	0.00248	0.0484	ENSG00000232723.1	ENST00000450311.1	13110	no_CPG	121323105	121324105	4.31	Distal Intergenic	2
FAM135B	-1.65	4.97e-05	0.00827	ENSG00000147724.11	ENST00000276737.10	-39745	no_CPG	138536567	138537567	5.29	Distal Intergenic	8
XPC	-1.65	0.000255	0.0195	ENSG00000154767.14	ENST00000285021.11	-31855	no_CPG	14210638	14211638	4.61	Distal Intergenic	3
RPL7AL2	-1.65	0.000352	0.0225	ENSG00000228210.1	ENST00000429405.1	-10206	no_CPG	4601506	4602506	4.53	Distal Intergenic	20
NFIA-AS1	-1.65	0.000553	0.0269	ENSG00000237853.6	ENST00000630199.2	8680	no_CPG	61243804	61244804	3.83	Intron (ENST00000371191.5/ENSG00000162599.15, intron 2 of 10)	1
IL18	-1.65	0.000561	0.027	ENSG00000150782.11	ENST00000525547.5	21913	no_CPG	112128160	112129160	4.16	Intron (ENST00000531744.5/ENSG00000255292.6, intron 3 of 5)	11
RP11-218C14.8	-1.65	0.000751	0.0301	ENSG00000270001.1	ENST00000602977.1	2537	no_CPG	23628779	23629779	4.01	Promoter (2-3kb)	20
RNU2-46P	-1.65	0.00103	0.0347	ENSG00000252847.1	ENST00000517038.1	-2110	no_CPG	95856794	95857794	4.84	Promoter (2-3kb)	9
CDC23	-1.65	0.00171	0.0416	ENSG00000094880.10	ENST00000394884.7	-17534	no_CPG	138230877	138231877	4.33	Distal Intergenic	5
GAPDHP66	-1.64	0.000262	0.0197	ENSG00000250933.1	ENST00000509132.1	-4443	no_CPG	3983058	3984058	4.83	Exon (ENST00000581550.5/ENSG00000170579.15, exon 5 of 5)	18
RNF217	-1.64	0.000372	0.0231	ENSG00000146373.16	ENST00000560949.5	-33234	no_CPG	124928311	124929311	4.75	Intron (ENST00000439075.1/ENSG00000236548.1, intron 5 of 6)	6
RP11-876F14.2	-1.64	0.000932	0.0328	ENSG00000270701.1	ENST00000605877.1	54266	no_CPG	81787403	81788403	3.7	Distal Intergenic	11
AOAH	-1.64	0.00128	0.0374	ENSG00000136250.11	ENST00000614254.1	-4844	no_CPG	36535528	36536528	3.83	Intron (ENST00000612871.4/ENSG00000136250.11, intron 15 of 19)	7
SAP30BP	-1.64	0.00219	0.0459	ENSG00000161526.14	ENST00000583063.1	666	no_CPG	75693212	75694212	4.2	Promoter (<=1kb)	17
RP11-112N23.1	-1.64	0.00223	0.0464	ENSG00000244266.1	ENST00000498788.1	-5508	no_CPG	50359144	50360144	3.56	Intron (ENST00000543111.5/ENSG00000185958.9, intron 3 of 7)	12
RAB31	-1.63	7.15e-06	0.00229	ENSG00000168461.12	ENST00000577284.1	11782	no_CPG	9867826	9868826	5.23	Distal Intergenic	18
RP11-118E18.2	-1.63	3.13e-05	0.00627	ENSG00000266100.1	ENST00000577189.1	0	no_CPG	57523529	57524529	5.16	Promoter (<=1kb)	17
RP11-466H18.1	-1.63	0.000114	0.0128	ENSG00000244398.1	ENST00000459748.1	-6243	no_CPG	16981256	16982256	4.88	Intron (ENST00000531066.5/ENSG00000166689.15, intron 3 of 26)	11
RP11-217E22.5	-1.63	0.000165	0.0155	ENSG00000243486.1	ENST00000463297.1	19328	no_CPG	153900854	153901854	4.97	Intron (ENST00000463297.1/ENSG00000243486.1, intron 2 of 5)	3
LINC01091	-1.63	0.000186	0.0166	ENSG00000249464.5	ENST00000514823.5	-61166	no_CPG	123588101	123589101	5.41	Distal Intergenic	4
FOXP1	-1.63	0.000233	0.0185	ENSG00000114861.18	ENST00000493010.2	-64613	no_CPG	71425373	71426373	4.18	Intron (ENST00000318789.8/ENSG00000114861.18, intron 3 of 20)	3
MIR145	-1.63	0.000347	0.0224	ENSG00000276365.1	ENST00000384967.1	24953	no_CPG	149455599	149456599	4.14	Distal Intergenic	5
LINC00882	-1.63	0.000374	0.0232	ENSG00000242759.6	ENST00000607542.5	-12510	no_CPG	107142501	107143501	4.45	Intron (ENST00000484698.5/ENSG00000242759.6, intron 1 of 7)	3
NWD1	-1.63	0.000377	0.0233	ENSG00000188039.13	ENST00000518676.5	0	no_CPG	16719292	16720292	4.78	Promoter (<=1kb)	19
PKIB	-1.63	0.000424	0.0247	ENSG00000135549.14	ENST00000354275.2	-20274	no_CPG	122696287	122697287	5.04	Intron (ENST00000615438.4/ENSG00000135549.14, intron 5 of 7)	6
MRPS23	-1.63	0.000975	0.0337	ENSG00000181610.12	ENST00000579380.1	-7648	no_CPG	57857704	57858704	4.09	Downstream (2-3kb)	17
TK2	-1.63	0.00112	0.0356	ENSG00000166548.15	ENST00000564792.1	2147	no_CPG	66521814	66522814	4.1	Promoter (2-3kb)	16
RBBP6	-1.63	0.00125	0.0371	ENSG00000122257.18	ENST00000564314.5	-10771	no_CPG	24525922	24526922	4	Distal Intergenic	16
RP11-380D11.2	-1.63	0.00184	0.0429	ENSG00000260926.2	ENST00000607505.1	2204	no_CPG	41606720	41607720	3.87	Promoter (2-3kb)	15
RP6-114E22.1	-1.62	3.9e-05	0.00733	ENSG00000266869.1	ENST00000555581.1	-44414	no_CPG	71803192	71804192	5.06	Distal Intergenic	14
RN7SKP289	-1.62	0.0001	0.0119	ENSG00000253053.1	ENST00000517244.1	-16932	no_CPG	53798253	53799253	4.84	Distal Intergenic	12
CREB5	-1.62	0.000124	0.0135	ENSG00000146592.16	ENST00000498316.3	-3758	no_CPG	28804651	28805651	4.5	Intron (ENST00000396299.6/ENSG00000146592.16, intron 7 of 9)	7
RFPL1S	-1.62	0.000178	0.0161	ENSG00000225465.8	ENST00000539579.2	-14170	no_CPG	29455848	29456848	4.84	Intron (ENST00000461286.4/ENSG00000225465.8, intron 2 of 2)	22
PRKCE	-1.62	0.000217	0.0179	ENSG00000171132.13	ENST00000489067.1	-31360	no_CPG	45945735	45946735	4.74	Intron (ENST00000306156.7/ENSG00000171132.13, intron 2 of 14)	2
CCR3	-1.62	0.000309	0.0213	ENSG00000183625.14	ENST00000357422.2	0	no_CPG	46163354	46164354	4.27	Promoter (<=1kb)	3
AP001891.1	-1.62	0.000339	0.0222	ENSG00000236437.1	ENST00000452629.1	189534	no_CPG	116310096	116311096	4.4	Distal Intergenic	11
CRIP1P4	-1.62	0.000359	0.0227	ENSG00000182351.7	ENST00000442565.1	14512	no_CPG	24726804	24727804	6.16	Intron (ENST00000616349.4/ENSG00000184571.13, intron 15 of 19)	22
RNU6-601P	-1.62	0.000512	0.0259	ENSG00000207270.1	ENST00000384540.1	-121433	no_CPG	149732207	149733207	3.92	Intron (ENST00000449714.1/ENSG00000231969.1, intron 1 of 2)	2
NFATC2	-1.62	0.000644	0.0286	ENSG00000101096.19	ENST00000609507.1	-6677	no_CPG	51569508	51570508	4.09	Distal Intergenic	20
IQSEC1	-1.62	0.00069	0.0292	ENSG00000144711.13	ENST00000473088.1	-23796	no_CPG	13018922	13019922	4.23	Intron (ENST00000613206.1/ENSG00000144711.13, intron 1 of 13)	3
CTB-50E14.5	-1.62	0.000838	0.0316	ENSG00000269374.1	ENST00000600255.1	-2734	no_CPG	42488448	42489448	3.93	Promoter (2-3kb)	19
LGR4	-1.62	0.0017	0.0416	ENSG00000205213.13	ENST00000527773.1	-5366	no_CPG	27390898	27391898	3.48	Exon (ENST00000379214.8/ENSG00000205213.13, exon 4 of 18)	11
ABLIM3	-1.62	0.00238	0.0478	ENSG00000173210.19	ENST00000514212.5	-22302	no_CPG	149209951	149210951	4.82	3' UTR	5
AJ006998.2	-1.62	0.00263	0.0498	ENSG00000229425.2	ENST00000449602.1	-12976	no_CPG	15415281	15416281	3.98	Intron (ENST00000634642.1/ENSG00000229425.2, intron 1 of 6)	21
CTA-398F10.2	-1.61	2e-05	0.00463	ENSG00000254153.1	ENST00000521218.1	-21649	no_CPG	8482986	8483986	5.14	Distal Intergenic	8
RNU6-560P	-1.61	9.28e-05	0.0115	ENSG00000200877.1	ENST00000364007.1	-881	no_CPG	86151346	86152346	5.52	Promoter (<=1kb)	11
RP11-861A13.3	-1.61	9.84e-05	0.0118	ENSG00000279277.1	ENST00000624541.1	38494	no_CPG	107998951	107999951	4.38	Distal Intergenic	3
RP11-392P7.1	-1.61	0.000274	0.0202	ENSG00000241352.3	ENST00000475592.2	8438	no_CPG	12859420	12860420	4.22	Distal Intergenic	12
RPL5P13	-1.61	0.000521	0.0262	ENSG00000242134.2	ENST00000462840.2	194219	no_CPG	142092406	142093406	4.07	Intron (ENST00000513000.5/ENSG00000109452.12, intron 24 of 26)	4
AC226118.1	-1.61	0.000584	0.0274	ENSG00000249574.1	ENST00000515213.1	56368	no_CPG	435727	436727	4.54	Distal Intergenic	7
CRHR2	-1.61	0.000677	0.029	ENSG00000106113.18	ENST00000462882.1	-16723	no_CPG	30716852	30717852	3.91	Intron (ENST00000484180.1/ENSG00000241644.2, intron 1 of 3)	7
RP1-288L1.4	-1.61	0.000738	0.0298	ENSG00000237316.1	ENST00000440858.1	-87404	no_CPG	34812323	34813323	4.51	Distal Intergenic	22
RP11-699L21.2	-1.61	0.000864	0.032	ENSG00000238043.1	ENST00000426616.1	-50992	no_CPG	193928622	193929622	4.39	Distal Intergenic	3
MIR3148	-1.61	0.00136	0.0381	ENSG00000264788.1	ENST00000579676.1	-17289	no_CPG	29974637	29975637	4.56	Distal Intergenic	8
SHROOM4	-1.61	0.00142	0.0386	ENSG00000158352.15	ENST00000376020.6	42658	no_CPG	50770386	50771386	4.09	Intron (ENST00000376020.6/ENSG00000158352.15, intron 1 of 8)	23
RP11-9H20.2	-1.61	0.00184	0.0429	ENSG00000280365.1	ENST00000624404.1	90642	no_CPG	44823217	44824217	3.87	Intron (ENST00000426838.8/ENSG00000152217.16, intron 2 of 3)	18
STAM2	-1.61	0.00213	0.0456	ENSG00000115145.9	ENST00000263904.4	-46919	no_CPG	152222911	152224128	3.87	Distal Intergenic	2
OSBPL9	-1.61	0.00215	0.0458	ENSG00000117859.18	ENST00000371714.5	-1137	no_CPG	51575042	51576042	4.31	Promoter (1-2kb)	1
RP11-268G13.1	-1.61	0.00217	0.0459	ENSG00000261411.1	ENST00000569833.1	-28544	no_CPG	11715867	11716867	3.22	Distal Intergenic	20
MIR6079	-1.6	2.54e-05	0.00548	ENSG00000283477.1	ENST00000635807.1	-2680	no_CPG	43834942	43835942	5.04	Promoter (2-3kb)	1
CTC-340D7.1	-1.6	9.2e-05	0.0115	ENSG00000249335.1	ENST00000503268.1	36939	no_CPG	68924219	68925219	4.91	Intron (ENST00000503268.1/ENSG00000249335.1, intron 2 of 2)	5
RPS3AP5	-1.6	0.000142	0.0144	ENSG00000178429.9	ENST00000389400.4	124027	no_CPG	84684470	84685470	5.02	Distal Intergenic	10
KLHL29	-1.6	0.000287	0.0208	ENSG00000119771.14	ENST00000486442.5	67403	no_CPG	23452620	23453620	4.77	Intron (ENST00000486442.5/ENSG00000119771.14, intron 1 of 13)	2
DST	-1.6	0.000322	0.0217	ENSG00000151914.19	ENST00000244364.10	-9591	no_CPG	56652587	56653587	4.25	Intron (ENST00000421834.6/ENSG00000151914.19, intron 6 of 93)	6
AC007795.1	-1.6	0.000499	0.0258	ENSG00000267617.1	ENST00000585883.1	-4860	no_CPG	28863936	28864936	5	Distal Intergenic	19
BCL9	-1.6	0.000503	0.0258	ENSG00000116128.10	ENST00000234739.7	3376	no_CPG	147544788	147545788	4.12	Intron (ENST00000234739.7/ENSG00000116128.10, intron 1 of 9)	1
OSBPL10	-1.6	0.00093	0.0328	ENSG00000144645.13	ENST00000466604.5	-452	no_CPG	31960788	31961788	4.39	Promoter (<=1kb)	3
DHX35	-1.6	0.000975	0.0337	ENSG00000101452.14	ENST00000482619.1	86780	no_CPG	39117140	39118140	4.03	Distal Intergenic	20
YWHAZP2	-1.6	0.00111	0.0355	ENSG00000213236.3	ENST00000440317.1	74730	no_CPG	126482432	126483432	3.92	Distal Intergenic	2
IRF6	-1.6	0.00176	0.0422	ENSG00000117595.10	ENST00000542854.5	-1545	no_CPG	209807720	209808720	4.61	Promoter (1-2kb)	1
CTD-2337I7.1	-1.6	0.00182	0.0429	ENSG00000255345.1	ENST00000526091.1	26336	no_CPG	79119635	79120635	4.12	Intron (ENST00000278550.11/ENSG00000149256.15, intron 4 of 33)	11
snoU13	-1.59	4.11e-05	0.0075	ENSG00000239153.1	ENST00000458951.1	9554	no_CPG	115616631	115617631	5.44	Distal Intergenic	11
FER1L6-AS1	-1.59	0.000101	0.012	ENSG00000181171.5	ENST00000518567.1	-3464	no_CPG	124044246	124045246	5.39	Intron (ENST00000522917.5/ENSG00000214814.7, intron 20 of 40)	8
Metazoa_SRP	-1.59	0.000311	0.0213	ENSG00000274357.1	ENST00000618452.1	-49155	no_CPG	45781511	45782511	4.15	3' UTR	13
SULF2	-1.59	0.000326	0.0217	ENSG00000196562.14	ENST00000484875.5	-5093	no_CPG	47791709	47792709	5.19	Distal Intergenic	20
RP11-150O12.4	-1.59	0.000532	0.0265	ENSG00000254306.1	ENST00000517714.1	-11446	no_CPG	37637319	37638319	5	Intron (ENST00000519978.1/ENSG00000253344.1, intron 1 of 1)	8
MIR3125	-1.59	0.000691	0.0292	ENSG00000264370.1	ENST00000579927.1	58987	no_CPG	12796354	12797354	4.19	Distal Intergenic	2
RPS20P10	-1.59	0.000915	0.0326	ENSG00000233971.1	ENST00000451209.1	-56328	no_CPG	72040762	72041762	3.9	Distal Intergenic	2
CDK7PS	-1.59	0.000929	0.0328	ENSG00000213194.3	ENST00000434574.1	102953	no_CPG	157107586	157108586	4.17	Distal Intergenic	2
PCTP	-1.59	0.000988	0.0339	ENSG00000141179.13	ENST00000572536.1	20733	no_CPG	55794469	55795469	4.52	Intron (ENST00000573500.5/ENSG00000141179.13, intron 5 of 5)	17
MPP5	-1.59	0.00106	0.035	ENSG00000072415.8	ENST00000557237.1	9694	no_CPG	67251321	67252321	4.45	Intron (ENST00000261681.8/ENSG00000072415.8, intron 1 of 14)	14
ADCK1	-1.59	0.00127	0.0374	ENSG00000063761.15	ENST00000555217.1	56401	no_CPG	77979633	77980633	4.17	Distal Intergenic	14
RP11-535A5.1	-1.59	0.00204	0.0448	ENSG00000273348.1	ENST00000608890.1	46858	no_CPG	22300394	22301394	3.85	Distal Intergenic	18
RP11-150O12.3	-1.59	0.00247	0.0484	ENSG00000254290.1	ENST00000522471.1	3387	no_CPG	37594391	37595391	3.73	Downstream (2-3kb)	8
RP3-449H6.2	-1.58	0.000129	0.0136	ENSG00000279076.1	ENST00000624717.1	110860	no_CPG	44662437	44663437	5	Distal Intergenic	6
CALML3-AS1	-1.58	0.000199	0.0173	ENSG00000205488.8	ENST00000542093.5	-24715	no_CPG	5550961	5551961	4.52	Distal Intergenic	10
RP11-325F22.2	-1.58	0.000517	0.0261	ENSG00000237513.1	ENST00000417026.1	2027	no_CPG	104943233	104944233	4.69	Promoter (2-3kb)	7
NCAM1	-1.58	0.000572	0.0272	ENSG00000149294.16	ENST00000611284.4	43640	no_CPG	113176568	113177568	4.1	Intron (ENST00000621518.4/ENSG00000149294.16, intron 2 of 19)	11
AC018737.3	-1.58	0.00103	0.0347	ENSG00000224655.5	ENST00000422649.1	445693	no_CPG	122236185	122237185	4.45	Distal Intergenic	2
PDLIM4	-1.58	0.00179	0.0425	ENSG00000131435.12	ENST00000484620.1	-1576	no_CPG	132267856	132268856	3.34	Promoter (1-2kb)	5
ADCY8	-1.58	0.00195	0.044	ENSG00000155897.9	ENST00000377928.7	7364	no_CPG	131031969	131032969	4	Intron (ENST00000286355.9/ENSG00000155897.9, intron 1 of 17)	8
RP11-379B18.5	-1.58	0.00209	0.0454	ENSG00000241288.7	ENST00000628013.2	-1547	no_CPG	125912036	125913036	4.01	Promoter (1-2kb)	3
RP5-945F2.3	-1.58	0.00211	0.0455	ENSG00000226829.1	ENST00000446187.1	-32253	no_CPG	68320486	68321486	4.16	Distal Intergenic	7
CTD-2315A10.2	-1.58	0.00258	0.0492	ENSG00000258685.2	ENST00000556311.2	18728	no_CPG	59116693	59117693	5.09	Distal Intergenic	14
CTA-221G9.12	-1.57	4.27e-05	0.00769	ENSG00000203280.4	ENST00000366110.4	-7174	no_CPG	25119866	25120866	6.11	Intron (ENST00000406486.8/ENSG00000197077.13, intron 7 of 13)	22
CTC-537E7.2	-1.57	0.00012	0.0132	ENSG00000248359.1	ENST00000515199.1	-609	no_CPG	68534139	68535139	4.58	Promoter (<=1kb)	5
AC067959.1	-1.57	0.000153	0.015	ENSG00000233005.1	ENST00000457901.1	34492	no_CPG	21255677	21256677	5.48	Intron (ENST00000435237.1/ENSG00000233005.1, intron 1 of 5)	2
CLIC5	-1.57	0.000289	0.0208	ENSG00000112782.15	ENST00000185206.10	-17953	no_CPG	46098348	46099348	4.64	Intron (ENST00000444038.2/ENSG00000231769.2, intron 2 of 2)	6
RP11-382A18.3	-1.57	0.000521	0.0262	ENSG00000271509.1	ENST00000605028.1	5081	no_CPG	127297314	127298314	4.87	Intron (ENST00000501396.5/ENSG00000246228.6, intron 2 of 2)	8
RP11-121L11.3	-1.57	0.000782	0.0306	ENSG00000249830.1	ENST00000512521.1	-131657	no_CPG	3320159	3321159	4.14	Distal Intergenic	5
PKIB	-1.57	0.000939	0.0329	ENSG00000135549.14	ENST00000368448.5	-3033	no_CPG	122606199	122607199	3.89	Intron (ENST00000615438.4/ENSG00000135549.14, intron 3 of 7)	6
BRINP2	-1.57	0.00138	0.0384	ENSG00000198797.6	ENST00000478325.1	17695	no_CPG	177274555	177275555	4.59	Intron (ENST00000361539.4/ENSG00000198797.6, intron 5 of 7)	1
SUSD6	-1.57	0.0014	0.0385	ENSG00000100647.7	ENST00000556993.1	0	no_CPG	69658324	69659324	3.89	Promoter (<=1kb)	14
GSTO3P	-1.57	0.00148	0.0392	ENSG00000232829.3	ENST00000504733.1	-5956	no_CPG	130820703	130821703	4.28	Distal Intergenic	3
MIR3681HG	-1.57	0.00176	0.0422	ENSG00000224184.5	ENST00000412606.1	-10289	no_CPG	12303028	12304028	4.66	Intron (ENST00000438292.5/ENSG00000224184.5, intron 3 of 4)	2
CFL1P3	-1.57	0.00237	0.0477	ENSG00000228056.3	ENST00000440942.1	16412	no_CPG	63826273	63827273	4	Intron (ENST00000371080.5/ENSG00000185483.11, intron 1 of 6)	1
RP11-575N15.1	-1.56	6.21e-05	0.00942	ENSG00000270234.1	ENST00000605632.1	-20456	no_CPG	8702554	8703554	4.91	Distal Intergenic	10
ALG14	-1.56	0.000113	0.0128	ENSG00000172339.9	ENST00000507727.2	-7511	no_CPG	95034714	95036174	5.03	Exon (ENST00000495856.1/ENSG00000172339.9, exon 4 of 4)	1
PRKCA-AS1	-1.56	0.000433	0.0249	ENSG00000264630.5	ENST00000584715.5	-92191	no_CPG	66509045	66510045	5.82	Intron (ENST00000578063.5/ENSG00000154229.11, intron 3 of 9)	17
PRKCH	-1.56	0.000556	0.0269	ENSG00000027075.13	ENST00000555185.5	-46030	no_CPG	61140529	61141529	4.39	Distal Intergenic	14
DFNA5	-1.56	0.000836	0.0316	ENSG00000105928.13	ENST00000342947.7	-16496	no_CPG	24774609	24775609	3.99	Distal Intergenic	7
RP11-361D14.2	-1.56	0.00085	0.0317	ENSG00000261129.1	ENST00000568324.1	-105250	no_CPG	144399650	144400650	4.23	Distal Intergenic	4
RN7SKP93	-1.56	0.000891	0.0324	ENSG00000200708.1	ENST00000363838.1	245494	no_CPG	133841585	133842585	4.14	Distal Intergenic	2
SLC25A18P1	-1.56	0.00107	0.0352	ENSG00000234309.1	ENST00000449385.1	-49412	no_CPG	118522459	118523459	3.94	Distal Intergenic	10
AFAP1L2	-1.56	0.00153	0.0398	ENSG00000169129.14	ENST00000419268.1	14271	no_CPG	114389209	114390209	3.41	Intron (ENST00000304129.8/ENSG00000169129.14, intron 1 of 18)	10
RPL35AP22	-1.56	0.00169	0.0416	ENSG00000235133.1	ENST00000436855.1	6036	no_CPG	117678552	117679552	3.71	Distal Intergenic	9
IGFL4	-1.56	0.00195	0.044	ENSG00000204869.8	ENST00000595006.1	5798	no_CPG	46056130	46057130	4.04	Intron (ENST00000601672.5/ENSG00000204869.8, intron 2 of 5)	19
GLS	-1.56	0.00248	0.0484	ENSG00000115419.12	ENST00000320717.7	-30392	no_CPG	190849435	190850435	3.64	Distal Intergenic	2
RP11-284A20.1	-1.56	0.00254	0.0488	ENSG00000249423.1	ENST00000509456.1	15617	no_CPG	124935564	124936564	4.35	Distal Intergenic	5
RP11-361D14.2	-1.55	4.54e-05	0.00789	ENSG00000261129.1	ENST00000568324.1	-148881	no_CPG	144356019	144357019	5.3	Distal Intergenic	4
CDK5PS	-1.55	5.36e-05	0.00867	ENSG00000235165.2	ENST00000442838.2	-9878	no_CPG	122758396	122759396	5.38	Distal Intergenic	8
RP11-382N13.2	-1.55	7.06e-05	0.0101	ENSG00000261811.1	ENST00000566684.1	3692	no_CPG	5215902	5216902	5.06	Exon (ENST00000566684.1/ENSG00000261811.1, exon 2 of 3)	16
COQ10BP2	-1.55	7.48e-05	0.0103	ENSG00000251552.1	ENST00000513804.1	-653	no_CPG	83281297	83282297	4.66	Promoter (<=1kb)	5
ZNF385B	-1.55	0.000234	0.0185	ENSG00000144331.18	ENST00000495289.1	-6548	no_CPG	179543051	179544051	5.13	Intron (ENST00000466398.5/ENSG00000144331.18, intron 4 of 12)	2
KCNK10	-1.55	0.0005	0.0258	ENSG00000100433.15	ENST00000340700.9	-18963	no_CPG	88345870	88346870	4.66	Distal Intergenic	14
CPHL1P	-1.55	0.000615	0.0279	ENSG00000240216.7	ENST00000482639.2	-6143	no_CPG	149297943	149298943	4.02	Intron (ENST00000489011.1/ENSG00000244468.1, intron 1 of 1)	3
RP11-86H7.6	-1.55	0.000821	0.0314	ENSG00000223675.1	ENST00000413541.1	-9688	no_CPG	94601985	94602985	3.93	Distal Intergenic	1
NR3C2	-1.55	0.000879	0.0322	ENSG00000151623.14	ENST00000504753.1	-7348	no_CPG	148375818	148376818	4.17	Intron (ENST00000344721.8/ENSG00000151623.14, intron 2 of 8)	4
BARX2	-1.55	0.00107	0.0352	ENSG00000043039.6	ENST00000605151.1	3571	no_CPG	129439745	129440745	4.38	Intron (ENST00000281437.5/ENSG00000043039.6, intron 2 of 3)	11
SYNE3	-1.55	0.00108	0.0353	ENSG00000176438.12	ENST00000553340.1	-7023	no_CPG	95482859	95483859	3.76	Distal Intergenic	14
EBF1	-1.55	0.00111	0.0355	ENSG00000164330.16	ENST00000518323.1	46615	no_CPG	158660394	158661394	4.43	Distal Intergenic	5
RP11-290M5.2	-1.55	0.00134	0.0379	ENSG00000230285.1	ENST00000426794.1	23604	no_CPG	85622735	85623735	4.18	Distal Intergenic	1
ANO4	-1.55	0.0014	0.0385	ENSG00000151572.16	ENST00000550015.1	3771	no_CPG	101051759	101052759	4.39	Intron (ENST00000392979.7/ENSG00000151572.16, intron 13 of 26)	12
PZP	-1.55	0.00166	0.0411	ENSG00000126838.9	ENST00000539983.5	3417	no_CPG	9163080	9164080	4.08	Exon (ENST00000261336.6/ENSG00000126838.9, exon 21 of 36)	12
FILIP1L	-1.55	0.0017	0.0416	ENSG00000168386.18	ENST00000468533.1	42920	no_CPG	100070344	100071344	3.75	Intron (ENST00000421999.7/ENSG00000184220.11, intron 1 of 9)	3
NFIB	-1.55	0.00195	0.044	ENSG00000147862.15	ENST00000606230.2	-3720	no_CPG	14326058	14327058	4.26	Intron (ENST00000416996.1/ENSG00000225472.1, intron 1 of 1)	9
LINC00578	-1.55	0.00242	0.0479	ENSG00000228221.5	ENST00000445673.1	774	no_CPG	177618364	177619364	3.49	Promoter (<=1kb)	3
C1orf195	-1.55	0.00245	0.0482	ENSG00000204464.7	ENST00000625027.2	-2878	no_CPG	15174195	15175195	3.7	Promoter (2-3kb)	1
RP11-230G5.2	-1.54	0.00014	0.0143	ENSG00000250748.6	ENST00000538294.1	47806	no_CPG	65489893	65490893	5.24	Intron (ENST00000537250.5/ENSG00000250748.6, intron 3 of 3)	12
RP5-1063M23.3	-1.54	0.000163	0.0155	ENSG00000250770.3	ENST00000635814.1	0	no_CPG	3336237	3337237	5.15	Promoter (<=1kb)	12
RP11-941H19.2	-1.54	0.0004	0.0239	ENSG00000213791.4	ENST00000472088.1	-2953	no_CPG	80296916	80297916	4.52	Promoter (2-3kb)	8
RP11-157D18.2	-1.54	0.000466	0.0253	ENSG00000235002.1	ENST00000411908.1	-7746	no_CPG	42420540	42421540	4.84	3' UTR	1
SALL4P1	-1.54	0.000669	0.029	ENSG00000250308.2	ENST00000510352.2	12978	no_CPG	57435442	57436442	4.34	Intron (ENST00000506106.1/ENSG00000250961.1, intron 1 of 3)	5
FLT1P1	-1.54	0.00079	0.0308	ENSG00000229515.1	ENST00000451650.1	32413	no_CPG	46110264	46111264	4.06	Distal Intergenic	3
Y_RNA	-1.54	0.00201	0.0447	ENSG00000202438.1	ENST00000365568.1	59693	no_CPG	130513419	130514419	4.13	Distal Intergenic	6
RP11-319E16.1	-1.54	0.00202	0.0448	ENSG00000256115.5	ENST00000540237.1	16601	no_CPG	5220671	5221671	3.79	Distal Intergenic	12
RP4-799G3.2	-1.54	0.00252	0.0486	ENSG00000271399.1	ENST00000604004.1	-15180	no_CPG	228841830	228842830	3.62	Distal Intergenic	1
FLNB-AS1	-1.53	0.000482	0.0254	ENSG00000244161.1	ENST00000472922.1	412	no_CPG	58163902	58164902	4.28	Promoter (<=1kb)	3
RP11-291C6.1	-1.53	0.000488	0.0256	ENSG00000219622.1	ENST00000407887.1	-6557	no_CPG	150516857	150517857	3.96	Distal Intergenic	6
LINC00639	-1.53	0.000679	0.029	ENSG00000259070.5	ENST00000553932.5	0	no_CPG	38947835	38948835	4.11	Promoter (<=1kb)	14
CADM1	-1.53	0.00137	0.0382	ENSG00000182985.16	ENST00000612471.4	961	no_CPG	115238460	115239460	3.85	Promoter (<=1kb)	11
snoU13	-1.53	0.00191	0.0436	ENSG00000239153.1	ENST00000458951.1	12473	no_CPG	115613712	115614712	3.81	Distal Intergenic	11
BANF1P1	-1.52	1.14e-05	0.00315	ENSG00000258531.2	ENST00000553684.2	2999	no_CPG	68939601	68940601	5.67	Promoter (2-3kb)	14
RP4-800J21.3	-1.52	0.000135	0.0139	ENSG00000218018.2	ENST00000417346.1	-42268	no_CPG	57435330	57436330	6.07	Distal Intergenic	20
ASAP1	-1.52	0.000388	0.0236	ENSG00000153317.14	ENST00000518721.5	-70329	no_CPG	130513989	130514989	5.26	Distal Intergenic	8
LINC01541	-1.52	0.00043	0.0248	ENSG00000260676.5	ENST00000566582.1	134319	no_CPG	71443618	71444618	4.18	Distal Intergenic	18
Metazoa_SRP	-1.52	0.000504	0.0258	ENSG00000276202.1	ENST00000614073.1	4745	no_CPG	77019625	77020625	4.74	Distal Intergenic	17
RP11-453O22.1	-1.52	0.000649	0.0287	ENSG00000226211.1	ENST00000448432.1	35600	no_CPG	221097621	221098621	4.64	Distal Intergenic	1
FNBP1	-1.52	0.000694	0.0292	ENSG00000187239.16	ENST00000449089.6	2286	no_CPG	129991581	129992581	4.2	Promoter (2-3kb)	9
RNU6-99P	-1.52	0.00106	0.035	ENSG00000201591.1	ENST00000364721.1	109682	no_CPG	39370789	39371789	4.15	Distal Intergenic	11
RP11-733D4.1	-1.52	0.00127	0.0372	ENSG00000234580.1	ENST00000456722.1	-100899	no_CPG	44703003	44704003	4.25	Distal Intergenic	10
RNU6-718P	-1.52	0.00155	0.0399	ENSG00000251975.1	ENST00000516166.1	-16229	no_CPG	120353882	120354882	4.11	Intron (ENST00000569928.1/ENSG00000261036.1, intron 1 of 1)	5
CTD-2206G10.2	-1.52	0.00159	0.0404	ENSG00000249774.1	ENST00000506046.1	-738	no_CPG	31921629	31922629	4.55	Promoter (<=1kb)	5
RP1-41C23.1	-1.52	0.00221	0.0461	ENSG00000266877.1	ENST00000578650.1	-1491	no_CPG	31580671	31581671	4.11	Promoter (1-2kb)	17
UXS1	-1.52	0.00259	0.0493	ENSG00000115652.14	ENST00000470053.1	-10147	no_CPG	106114971	106115971	3.85	Intron (ENST00000283148.11/ENSG00000115652.14, intron 9 of 14)	2
RP11-132G19.3	-1.51	0.000126	0.0136	ENSG00000231978.2	ENST00000434488.2	-2877	no_CPG	21764392	21765392	5.03	Promoter (2-3kb)	1
PRICKLE2	-1.51	0.000136	0.014	ENSG00000163637.11	ENST00000498162.1	-83575	no_CPG	64351554	64352554	4.84	Intron (ENST00000564377.5/ENSG00000163637.11, intron 2 of 8)	3
SCARNA16	-1.51	0.000502	0.0258	ENSG00000251942.1	ENST00000516133.1	116504	no_CPG	53353125	53354125	4.73	Distal Intergenic	2
RP11-59H1.1	-1.51	0.000775	0.0305	ENSG00000242329.1	ENST00000464893.1	1950	no_CPG	12838129	12839129	4.54	Promoter (1-2kb)	12
RP11-245A18.1	-1.51	0.000939	0.0329	ENSG00000254000.1	ENST00000522087.1	-765	no_CPG	123926698	123927698	4.64	Promoter (<=1kb)	8
LIPG	-1.51	0.00122	0.0369	ENSG00000101670.11	ENST00000623277.1	23611	no_CPG	49612970	49613970	4.14	Distal Intergenic	18
LNX1	-1.51	0.00139	0.0385	ENSG00000072201.13	ENST00000306888.6	-5264	no_CPG	53563481	53564481	4.05	Intron (ENST00000507166.5/ENSG00000282278.1, intron 12 of 23)	4
SEMA3A	-1.51	0.00182	0.0429	ENSG00000075213.10	ENST00000265362.8	70092	no_CPG	84123809	84124809	3.83	Intron (ENST00000265362.8/ENSG00000075213.10, intron 3 of 16)	7
CTD-2021K4.1	-1.51	0.00187	0.0433	ENSG00000283228.1	ENST00000636024.1	-676	no_CPG	151842690	151843690	3.84	Promoter (<=1kb)	2
AFF3	-1.51	0.00241	0.0479	ENSG00000144218.18	ENST00000445815.1	-119927	no_CPG	99698297	99699297	4.01	Intron (ENST00000409236.6/ENSG00000144218.18, intron 9 of 22)	2
RP11-309M7.1	-1.51	0.00252	0.0486	ENSG00000261298.1	ENST00000565664.1	-43414	no_CPG	234178424	234179424	4.69	Distal Intergenic	2
INTS6P1	-1.51	0.00253	0.0487	ENSG00000250492.1	ENST00000504674.1	-34069	no_CPG	39755582	39756582	4.05	Distal Intergenic	5
RP11-1C1.5	-1.5	0.000883	0.0323	ENSG00000249160.4	ENST00000504650.2	-2340	no_CPG	10524424	10525424	4.08	Promoter (2-3kb)	5
RN7SL79P	-1.5	0.00118	0.0363	ENSG00000239595.3	ENST00000484117.3	6338	no_CPG	31471881	31472881	3.77	Intron (ENST00000621161.4/ENSG00000131242.16, intron 3 of 14)	17
RNA5SP181	-1.5	0.00119	0.0364	ENSG00000222178.1	ENST00000410246.1	9363	no_CPG	36494706	36495706	4.89	Distal Intergenic	5
RP11-662G23.1	-1.5	0.00126	0.0372	ENSG00000254251.1	ENST00000517884.1	0	no_CPG	90858763	90859763	4.1	Promoter (<=1kb)	8
MYLK4	-1.5	0.00161	0.0406	ENSG00000145949.9	ENST00000274643.8	36087	no_CPG	2713879	2714879	3.52	Intron (ENST00000274643.8/ENSG00000145949.9, intron 2 of 12)	6
CTD-2005H7.2	-1.49	0.000616	0.028	ENSG00000255250.1	ENST00000532979.1	19554	no_CPG	86746909	86747909	4.74	Intron (ENST00000532979.1/ENSG00000255250.1, intron 1 of 4)	11
IL20RA	-1.49	0.000702	0.0293	ENSG00000016402.13	ENST00000367748.4	-10673	no_CPG	137055853	137056853	4.25	Distal Intergenic	6
NEBL-AS1	-1.49	0.000909	0.0326	ENSG00000231920.1	ENST00000417845.1	16885	no_CPG	21191239	21192239	5.2	Distal Intergenic	10
CTA-444M12.3	-1.49	0.00111	0.0355	ENSG00000278744.1	ENST00000617815.1	8534	no_CPG	134017567	134018567	5.09	Intron (ENST00000275230.5/ENSG00000146411.5, intron 2 of 4)	6
PEX14	-1.49	0.00184	0.0429	ENSG00000142655.12	ENST00000492696.1	-26494	no_CPG	10508394	10509394	3.94	Intron (ENST00000472851.1/ENSG00000142655.12, intron 2 of 3)	1
PHC2	-1.49	0.00189	0.0435	ENSG00000134686.17	ENST00000484692.1	-3622	no_CPG	33434674	33435674	3.93	Distal Intergenic	1
RNY3P14	-1.49	0.00195	0.044	ENSG00000207036.1	ENST00000384309.1	3331	no_CPG	70360678	70361678	3.43	Intron (ENST00000452400.6/ENSG00000140396.12, intron 1 of 22)	8
ACTL8	-1.49	0.00203	0.0448	ENSG00000117148.7	ENST00000375406.1	13267	no_CPG	17768580	17769580	3.82	Intron (ENST00000375406.1/ENSG00000117148.7, intron 1 of 2)	1
ANKS6	-1.49	0.00217	0.0459	ENSG00000165138.17	ENST00000486778.1	1820	no_CPG	98781648	98782648	4.04	Promoter (1-2kb)	9
LINC00609	-1.49	0.00231	0.0471	ENSG00000257585.1	ENST00000546508.1	20363	no_CPG	36090790	36091790	3.83	Intron (ENST00000546508.1/ENSG00000257585.1, intron 1 of 2)	14
EIF2AP4	-1.48	8.22e-05	0.0108	ENSG00000227395.1	ENST00000424793.1	-52817	no_CPG	44752626	44753626	5.19	Distal Intergenic	10
RP11-20J15.2	-1.48	0.000114	0.0128	ENSG00000237590.1	ENST00000437014.1	80924	no_CPG	44179889	44180889	5.07	Distal Intergenic	10
ITGB1	-1.48	0.000126	0.0136	ENSG00000150093.18	ENST00000475184.5	-4058	no_CPG	33009850	33010850	5.81	Intron (ENST00000450890.5/ENSG00000229656.6, intron 3 of 3)	10
AC092657.2	-1.48	0.00039	0.0237	ENSG00000237760.1	ENST00000436266.1	67588	no_CPG	46369708	46370708	4.61	Distal Intergenic	7
GRHL3	-1.48	0.000444	0.0251	ENSG00000158055.15	ENST00000361548.8	-28656	no_CPG	24289666	24290666	5.07	Distal Intergenic	1
AC073465.1	-1.48	0.000462	0.0253	ENSG00000213148.3	ENST00000456671.1	3147	no_CPG	173427665	173428665	4.74	Downstream (2-3kb)	2
Y_RNA	-1.48	0.000583	0.0273	ENSG00000207329.1	ENST00000384599.1	20638	no_CPG	109345323	109346323	4.91	Distal Intergenic	9
CEACAM3	-1.48	0.000842	0.0316	ENSG00000170956.16	ENST00000357396.7	-3240	no_CPG	41792197	41793197	4.61	Distal Intergenic	19
NAA20	-1.48	0.00142	0.0386	ENSG00000173418.11	ENST00000334982.8	-35339	no_CPG	19980777	19981777	3.98	Intron (ENST00000255006.10/ENSG00000132669.12, intron 8 of 11)	20
AC112715.2	-1.48	0.00155	0.0399	ENSG00000224132.2	ENST00000445534.2	-1257	no_CPG	237254834	237255834	4.33	Promoter (1-2kb)	2
CTD-2034I4.2	-1.48	0.00157	0.0401	ENSG00000259594.5	ENST00000558141.5	-60924	no_CPG	81492079	81493079	3.76	Intron (ENST00000559211.1/ENSG00000259543.1, intron 1 of 3)	15
NRXN1	-1.48	0.0019	0.0436	ENSG00000179915.22	ENST00000630431.1	31727	no_CPG	50952701	50953701	4.12	Intron (ENST00000625672.2/ENSG00000179915.22, intron 1 of 20)	2
GRIN2A	-1.48	0.00198	0.0443	ENSG00000183454.15	ENST00000636273.1	0	no_CPG	10121078	10122078	4.07	Promoter (<=1kb)	16
IKBKAP	-1.48	0.00208	0.0453	ENSG00000070061.14	ENST00000467959.1	3125	no_CPG	108885559	108886559	4.69	Intron (ENST00000495759.5/ENSG00000070061.14, intron 3 of 11)	9
FRMD4A	-1.47	0.000381	0.0233	ENSG00000151474.20	ENST00000475141.2	-24892	no_CPG	14487034	14488034	4.61	Distal Intergenic	10
KRT18	-1.47	0.000541	0.0266	ENSG00000111057.10	ENST00000548496.1	17935	no_CPG	52969677	52970677	5.06	Distal Intergenic	12
ADAMTS14	-1.47	0.000652	0.0287	ENSG00000138316.10	ENST00000373208.5	587	no_CPG	70673390	70674390	4.54	Promoter (<=1kb)	10
BRWD1P3	-1.47	0.000952	0.0332	ENSG00000232841.1	ENST00000428816.1	42726	no_CPG	16989752	16990752	4.54	Distal Intergenic	7
RP11-123G9.1	-1.47	0.00148	0.0392	ENSG00000232115.1	ENST00000418296.1	-50151	no_CPG	58157030	58158030	4.91	Distal Intergenic	10
AC104654.2	-1.47	0.00153	0.0398	ENSG00000234362.5	ENST00000436551.1	0	no_CPG	41933712	41934712	4.2	Promoter (<=1kb)	2
SEMA6A-AS1	-1.47	0.00161	0.0406	ENSG00000248445.5	ENST00000512128.1	-4836	no_CPG	116441711	116442711	4.97	Downstream (<1kb)	5
PI3	-1.47	0.00183	0.0429	ENSG00000124102.4	ENST00000243924.3	-16137	no_CPG	45157739	45158739	4.65	Distal Intergenic	20
RP11-1127D7.2	-1.47	0.00202	0.0448	ENSG00000278990.1	ENST00000624703.1	10666	no_CPG	98906135	98907135	4.65	Distal Intergenic	14
RP11-297M9.1	-1.47	0.00244	0.0482	ENSG00000260362.1	ENST00000561538.1	-29082	no_CPG	9705925	9706925	4.16	Distal Intergenic	16
EFEMP1	-1.47	0.00247	0.0483	ENSG00000115380.19	ENST00000634374.1	77939	no_CPG	55838841	55839841	3.91	Distal Intergenic	2
DNASE1L3	-1.47	0.00258	0.0493	ENSG00000163687.13	ENST00000483681.5	-2282	no_CPG	58216979	58217979	3.97	Promoter (2-3kb)	3
EIF4BP3	-1.46	0.000322	0.0217	ENSG00000224546.2	ENST00000432132.2	23011	no_CPG	96169018	96170018	4.72	Distal Intergenic	9
RP11-627G18.4	-1.46	0.000325	0.0217	ENSG00000264825.1	ENST00000578741.1	36538	no_CPG	22250316	22251316	4.53	Distal Intergenic	18
AC079753.4	-1.46	0.000348	0.0224	ENSG00000180152.3	ENST00000312918.2	15871	no_CPG	112869199	112870199	4.99	Distal Intergenic	2
RP11-397H6.1	-1.46	0.000454	0.0253	ENSG00000257470.1	ENST00000549896.1	14346	no_CPG	97038367	97039367	4.84	Intron (ENST00000552238.1/ENSG00000258131.1, intron 1 of 1)	12
ZBTB16	-1.46	0.000555	0.0269	ENSG00000109906.13	ENST00000545851.5	16981	no_CPG	114197747	114198747	4.94	Intron (ENST00000335953.8/ENSG00000109906.13, intron 4 of 6)	11
SEMA3E	-1.46	0.000672	0.029	ENSG00000170381.12	ENST00000442159.3	64492	no_CPG	83547156	83548156	5.56	Intron (ENST00000307792.7/ENSG00000170381.12, intron 1 of 16)	7
ARNTL	-1.46	0.00113	0.0357	ENSG00000133794.17	ENST00000485918.2	-15370	no_CPG	13333575	13334575	4.27	Intron (ENST00000529050.5/ENSG00000133794.17, intron 2 of 2)	11
RP4-641G12.4	-1.46	0.00129	0.0374	ENSG00000235400.1	ENST00000444644.1	-33212	no_CPG	78714861	78715861	4.57	Distal Intergenic	1
LINC01254	-1.46	0.00147	0.0392	ENSG00000260913.1	ENST00000566225.1	-7001	no_CPG	10421516	10422516	4.11	Distal Intergenic	18
PHLDB2	-1.46	0.00166	0.0412	ENSG00000144824.19	ENST00000393923.7	4895	no_CPG	111737392	111738392	4.56	Intron (ENST00000393934.7/ENSG00000240891.7, intron 3 of 3)	3
ADAMTS18	-1.46	0.00174	0.042	ENSG00000140873.15	ENST00000568393.1	14331	no_CPG	77305805	77306805	4.11	Intron (ENST00000282849.9/ENSG00000140873.15, intron 16 of 22)	16
AC005086.3	-1.46	0.00218	0.0459	ENSG00000280404.1	ENST00000623065.1	-3493	no_CPG	102164830	102165830	3.86	Intron (ENST00000437600.8/ENSG00000257923.9, intron 9 of 22)	7
KIAA1217	-1.46	0.00239	0.0478	ENSG00000120549.17	ENST00000636305.1	-73132	no_CPG	23967999	23968999	4.32	Intron (ENST00000376462.5/ENSG00000120549.17, intron 1 of 18)	10
RP11-354E23.5	-1.46	0.00239	0.0478	ENSG00000272627.1	ENST00000608259.1	17695	no_CPG	72784255	72785255	4.36	Intron (ENST00000373053.7/ENSG00000156026.14, intron 1 of 7)	10
RN7SKP43	-1.45	0.000329	0.0218	ENSG00000251982.1	ENST00000516173.1	-88276	no_CPG	217162280	217163280	4.92	Distal Intergenic	2
AC007563.4	-1.45	0.000758	0.0303	ENSG00000237930.1	ENST00000433233.1	10336	no_CPG	216774808	216775808	4.63	Intron (ENST00000447289.1/ENSG00000236886.2, intron 3 of 3)	2
LINC01335	-1.45	0.000771	0.0305	ENSG00000248942.1	ENST00000507890.1	34693	no_CPG	74272632	74273632	4.72	Distal Intergenic	5
RP11-521C20.5	-1.45	0.000816	0.0313	ENSG00000275636.1	ENST00000616620.1	2433	no_CPG	40081325	40082325	4.46	Promoter (2-3kb)	15
MYLK-AS1	-1.45	0.000842	0.0316	ENSG00000239523.5	ENST00000470449.1	16471	no_CPG	123602027	123603027	4.27	Intron (ENST00000485162.5/ENSG00000239523.5, intron 1 of 3)	3
RP11-398G24.2	-1.45	0.00088	0.0322	ENSG00000254303.1	ENST00000523792.1	-7223	no_CPG	122134407	122135407	4.93	Distal Intergenic	8
RP11-692N5.2	-1.45	0.00116	0.0361	ENSG00000266891.1	ENST00000578806.1	3559	no_CPG	9731043	9732043	4.75	Intron (ENST00000578921.5/ENSG00000168461.12, intron 1 of 6)	18
MEOX1	-1.45	0.00127	0.0372	ENSG00000005102.12	ENST00000318579.8	-8114	no_CPG	43670068	43671068	4.3	Distal Intergenic	17
LINC01122	-1.45	0.00128	0.0374	ENSG00000233723.7	ENST00000422793.1	48780	no_CPG	58973382	58974382	4.43	Intron (ENST00000452840.5/ENSG00000233723.7, intron 6 of 11)	2
ZCCHC24	-1.45	0.00185	0.043	ENSG00000165424.6	ENST00000372333.3	2845	no_CPG	79440374	79441374	3.91	Promoter (2-3kb)	10
RP11-103H7.2	-1.45	0.00204	0.0448	ENSG00000253220.1	ENST00000521428.1	2487	no_CPG	126500636	126501636	3.91	Promoter (2-3kb)	8
RPS3AP1	-1.45	0.00265	0.05	ENSG00000233206.1	ENST00000413190.1	-28760	no_CPG	20459522	20460522	3.62	Distal Intergenic	21
RP11-568G20.2	-1.44	0.000141	0.0143	ENSG00000259601.2	ENST00000558620.2	-12092	no_CPG	59885587	59886587	5.6	Distal Intergenic	15
RP11-283G6.5	-1.44	0.000743	0.03	ENSG00000255750.5	ENST00000537525.5	31712	no_CPG	26239110	26240110	6.07	Intron (ENST00000534829.5/ENSG00000123096.11, intron 1 of 3)	12
RP11-20J15.2	-1.44	0.000745	0.03	ENSG00000237590.1	ENST00000437014.1	65879	no_CPG	44194934	44195934	4.52	Distal Intergenic	10
SPEF2	-1.44	0.00119	0.0365	ENSG00000152582.13	ENST00000282469.10	-8339	no_CPG	35608505	35609505	3.99	Distal Intergenic	5
GALNTL6	-1.44	0.00152	0.0397	ENSG00000174473.15	ENST00000616459.1	41236	no_CPG	172850596	172851596	4.22	Intron (ENST00000506823.5/ENSG00000174473.15, intron 7 of 12)	4
ALK	-1.44	0.0017	0.0416	ENSG00000171094.15	ENST00000498037.1	37004	no_CPG	29281207	29282207	4.49	Intron (ENST00000389048.7/ENSG00000171094.15, intron 9 of 28)	2
CCDC192	-1.44	0.00175	0.0422	ENSG00000230561.4	ENST00000513708.1	0	no_CPG	127934511	127935511	5.08	Promoter (<=1kb)	5
RFK	-1.44	0.00201	0.0448	ENSG00000135002.11	ENST00000476087.5	23308	no_CPG	76369458	76370458	4.52	Distal Intergenic	9
CLASP1	-1.44	0.00205	0.045	ENSG00000074054.17	ENST00000430234.5	8833	no_CPG	121480495	121481495	4.1	Intron (ENST00000263710.8/ENSG00000074054.17, intron 8 of 39)	2
MIR3922	-1.44	0.0023	0.047	ENSG00000264295.1	ENST00000585192.1	103656	no_CPG	104695289	104696289	3.73	Intron (ENST00000549260.5/ENSG00000171310.10, intron 2 of 2)	12
RP11-592N21.1	-1.44	0.00239	0.0478	ENSG00000212664.5	ENST00000498103.1	11438	no_CPG	71329274	71330274	3.85	Intron (ENST00000355327.7/ENSG00000187720.14, intron 6 of 17)	15
RP11-622A1.2	-1.43	0.000248	0.0192	ENSG00000250436.1	ENST00000504368.1	10282	no_CPG	73520493	73521493	5.03	Intron (ENST00000502291.1/ENSG00000250436.1, intron 3 of 3)	4
SEMA3C	-1.43	0.000506	0.0258	ENSG00000075223.13	ENST00000475955.1	56351	no_CPG	80740887	80741887	4.76	Downstream (<1kb)	7
RP11-822P1.1	-1.43	0.001	0.0342	ENSG00000254591.1	ENST00000529936.1	-92048	no_CPG	127564520	127565520	4.37	Distal Intergenic	11
RP11-230C9.4	-1.43	0.00188	0.0434	ENSG00000271265.1	ENST00000604082.1	13594	no_CPG	156760068	156761068	4.21	Distal Intergenic	6
RP3-497J21.1	-1.43	0.0019	0.0436	ENSG00000235008.1	ENST00000454907.1	8270	no_CPG	166693569	166694569	4.21	Intron (ENST00000510118.5/ENSG00000071242.11, intron 3 of 22)	6
RAD9A	-1.43	0.00199	0.0445	ENSG00000172613.7	ENST00000543808.5	-5992	no_CPG	67384713	67385713	3.72	Intron (ENST00000622583.4/ENSG00000172613.7, intron 2 of 3)	11
CHN1	-1.43	0.00211	0.0454	ENSG00000128656.13	ENST00000409597.5	9111	no_CPG	174836294	174837294	4.18	Exon (ENST00000481174.1/ENSG00000128656.13, exon 4 of 4)	2
KRT8	-1.42	0.000262	0.0197	ENSG00000170421.12	ENST00000547031.5	5775	no_CPG	52895092	52896092	4.75	Downstream (1-2kb)	12
AC108925.1	-1.42	0.000297	0.0209	ENSG00000279524.1	ENST00000625070.1	-37591	no_CPG	127668248	127669248	5.42	Distal Intergenic	8
RP11-644L4.1	-1.42	0.0014	0.0385	ENSG00000255605.1	ENST00000545912.1	17306	no_CPG	95715392	95716392	4.63	Distal Intergenic	11
CARSP2	-1.42	0.00168	0.0414	ENSG00000253756.1	ENST00000520688.1	-268285	no_CPG	115060214	115061214	4.65	Distal Intergenic	8
C9orf3	-1.42	0.00223	0.0463	ENSG00000148120.15	ENST00000451893.5	-4209	no_CPG	94950737	94951737	4.11	Intron (ENST00000297979.9/ENSG00000148120.15, intron 5 of 14)	9
RN7SKP43	-1.41	0.000532	0.0265	ENSG00000251982.1	ENST00000516173.1	-90666	no_CPG	217159890	217160890	4.56	Distal Intergenic	2
CFL1P3	-1.41	0.000677	0.029	ENSG00000228056.3	ENST00000440942.1	-2306	no_CPG	63845991	63846991	4.53	Promoter (2-3kb)	1
RP11-550I15.1	-1.41	0.000701	0.0293	ENSG00000253114.2	ENST00000520784.2	200242	no_CPG	54896640	54897640	4.65	Distal Intergenic	8
CTD-2019O4.1	-1.41	0.000857	0.0318	ENSG00000254820.1	ENST00000530837.1	-338521	no_CPG	21773927	21774927	4.38	Distal Intergenic	11
RP11-774D14.1	-1.41	0.000917	0.0326	ENSG00000251629.6	ENST00000502427.5	-9424	no_CPG	20601416	20602416	4.36	Distal Intergenic	5
ACSBG1	-1.41	0.00117	0.0361	ENSG00000103740.9	ENST00000559241.5	215	no_CPG	78212284	78213284	4.59	Promoter (<=1kb)	15
TMEM217	-1.41	0.00124	0.0371	ENSG00000172738.11	ENST00000336655.6	12149	no_CPG	37244447	37245447	4.31	Intron (ENST00000356757.6/ENSG00000172738.11, intron 1 of 2)	6
RP11-525K10.2	-1.41	0.00207	0.0451	ENSG00000261376.1	ENST00000566030.1	166730	no_CPG	80345859	80346859	3.87	Intron (ENST00000568776.5/ENSG00000259867.5, intron 2 of 5)	16
RP11-26H16.4	-1.41	0.00231	0.0471	ENSG00000283234.1	ENST00000637118.1	0	no_CPG	21956547	21957547	3.92	Promoter (<=1kb)	1
CLPB	-1.41	0.00249	0.0485	ENSG00000162129.12	ENST00000536297.1	-7425	no_CPG	72387727	72388727	4.19	Intron (ENST00000294053.7/ENSG00000162129.12, intron 3 of 16)	11
RP3-370M22.8	-1.41	0.00255	0.0489	ENSG00000225528.2	ENST00000424496.2	-4948	no_CPG	39954449	39955449	4.81	Intron (ENST00000344138.8/ENSG00000100351.16, intron 2 of 7)	22
RP11-350F16.2	-1.4	0.00103	0.0347	ENSG00000253782.1	ENST00000519032.1	-13958	no_CPG	46948404	46949404	4.68	Distal Intergenic	8
CTC-497E21.5	-1.4	0.00104	0.0349	ENSG00000255558.1	ENST00000531136.1	7716	no_CPG	13126123	13127123	4.15	Intron (ENST00000531136.1/ENSG00000255558.1, intron 1 of 1)	11
KIAA0513	-1.4	0.00143	0.0386	ENSG00000135709.12	ENST00000566428.5	-12026	no_CPG	85050186	85051186	4.79	Intron (ENST00000258180.7/ENSG00000135709.12, intron 1 of 12)	16
RP11-286B14.2	-1.4	0.0015	0.0394	ENSG00000271252.1	ENST00000603401.1	0	no_CPG	95742370	95743370	4.49	Promoter (<=1kb)	1
AOAH	-1.4	0.00152	0.0397	ENSG00000136250.11	ENST00000543742.1	0	no_CPG	36661129	36662129	4.58	Promoter (<=1kb)	7
GFRA2	-1.4	0.00165	0.0411	ENSG00000168546.10	ENST00000517892.5	32640	no_CPG	21754519	21755519	3.96	Intron (ENST00000524240.5/ENSG00000168546.10, intron 3 of 8)	8
RP5-1132H15.3	-1.4	0.0018	0.0426	ENSG00000229886.1	ENST00000411872.1	-15572	no_CPG	66047116	66048116	4.67	Distal Intergenic	7
SPARCL1	-1.4	0.00185	0.0429	ENSG00000152583.12	ENST00000535835.5	6007	no_CPG	87521612	87522612	4.7	Intron (ENST00000282470.10/ENSG00000152583.12, intron 1 of 10)	4
RERG-AS1	-1.4	0.00234	0.0474	ENSG00000255660.1	ENST00000541243.1	711	no_CPG	15152634	15153634	4.36	Promoter (<=1kb)	12
PTGIS	-1.4	0.00242	0.0479	ENSG00000124212.5	ENST00000244043.4	-7194	no_CPG	49575340	49576340	4.02	Distal Intergenic	20
MIR7854	-1.4	0.00258	0.0492	ENSG00000277255.1	ENST00000620068.1	34125	no_CPG	81568027	81569027	3.87	Intron (ENST00000537098.7/ENSG00000153815.16, intron 1 of 20)	16
AC114783.1	-1.4	0.00261	0.0496	ENSG00000237524.8	ENST00000637962.1	-66539	no_CPG	126831343	126832343	3.96	Distal Intergenic	2
RPS4XP19	-1.39	0.000168	0.0157	ENSG00000242058.2	ENST00000460237.2	5229	no_CPG	9025258	9026258	5.3	Distal Intergenic	18
RP4-799G3.2	-1.39	0.000313	0.0214	ENSG00000271399.1	ENST00000604004.1	-18854	no_CPG	228838156	228839156	4.86	Distal Intergenic	1
MLLT10	-1.39	0.000405	0.0241	ENSG00000078403.16	ENST00000420525.1	50827	no_CPG	21724405	21725405	4.91	Intron (ENST00000631589.1/ENSG00000078403.16, intron 14 of 22)	10
Y_RNA	-1.39	0.000411	0.0243	ENSG00000207439.1	ENST00000384708.1	34470	no_CPG	65157839	65158839	4.99	Intron (ENST00000381055.7/ENSG00000049192.14, intron 24 of 24)	5
GRIN2B	-1.39	0.000428	0.0248	ENSG00000273079.5	ENST00000637214.1	15964	no_CPG	13591707	13592707	5.04	Intron (ENST00000637214.1/ENSG00000273079.5, intron 1 of 1)	12
FOXP1	-1.39	0.00113	0.0357	ENSG00000114861.18	ENST00000472382.5	2387	no_CPG	71050386	71051386	4.22	Promoter (2-3kb)	3
TRNP1	-1.39	0.00125	0.0371	ENSG00000253368.3	ENST00000531285.1	7105	no_CPG	27001424	27002424	4.66	Downstream (2-3kb)	1
SFXN5	-1.39	0.00177	0.0423	ENSG00000144040.12	ENST00000464825.5	-5052	no_CPG	73049667	73050667	4.37	Exon (ENST00000472259.5/ENSG00000144040.12, exon 3 of 3)	2
LINC00028	-1.39	0.00238	0.0478	ENSG00000233354.1	ENST00000435497.1	1969	no_CPG	31487747	31488747	3.69	Promoter (1-2kb)	20
CTD-2061E9.1	-1.38	8.08e-05	0.0107	ENSG00000249785.1	ENST00000512849.1	-86625	no_CPG	28374290	28375290	5.55	Distal Intergenic	5
CTD-2176I21.2	-1.38	0.000738	0.0298	ENSG00000248733.1	ENST00000510198.1	-27600	no_CPG	58891014	58892014	4.6	Distal Intergenic	5
LHFPL2	-1.38	0.00108	0.0353	ENSG00000145685.13	ENST00000502722.1	-13262	no_CPG	78504568	78505568	4.57	Intron (ENST00000515007.6/ENSG00000145685.13, intron 2 of 2)	5
RP11-51J9.4	-1.38	0.00145	0.039	ENSG00000253708.1	ENST00000523733.1	9855	no_CPG	30170033	30171033	4.33	Intron (ENST00000520739.5/ENSG00000104660.17, intron 4 of 5)	8
LINC00900	-1.38	0.00167	0.0414	ENSG00000246100.3	ENST00000602803.1	10444	no_CPG	115747409	115748409	4.5	Intron (ENST00000539305.1/ENSG00000256717.1, intron 2 of 2)	11
RP11-42I10.3	-1.38	0.00215	0.0458	ENSG00000260184.1	ENST00000569247.1	-99303	no_CPG	48949318	48950318	4.44	Distal Intergenic	16
WDR19	-1.38	0.00241	0.0479	ENSG00000157796.17	ENST00000512534.5	-14100	no_CPG	39254953	39255953	4.14	3' UTR	4
DLGAP1	-1.37	0.000626	0.0281	ENSG00000170579.15	ENST00000578250.6	25446	no_CPG	4124841	4125841	4.8	Intron (ENST00000315677.7/ENSG00000170579.15, intron 2 of 12)	18
RP11-211G23.1	-1.37	0.000738	0.0298	ENSG00000259854.1	ENST00000562341.1	2628	no_CPG	69416935	69417935	4.42	Promoter (2-3kb)	11
SOX9-AS1	-1.37	0.000989	0.0339	ENSG00000234899.9	ENST00000414600.1	-9549	no_CPG	72151329	72152329	4.4	Intron (ENST00000628742.2/ENSG00000234899.9, intron 2 of 6)	17
ANXA11	-1.37	0.00135	0.038	ENSG00000122359.17	ENST00000474545.1	7915	no_CPG	80196004	80197004	4.16	Intron (ENST00000372231.7/ENSG00000122359.17, intron 1 of 14)	10
COL21A1	-1.37	0.00137	0.0383	ENSG00000124749.16	ENST00000467045.5	0	no_CPG	56090816	56091816	4.69	Promoter (<=1kb)	6
CTC-394G3.1	-1.37	0.00142	0.0386	ENSG00000249950.1	ENST00000511727.1	145293	no_CPG	125716900	125717900	4.46	Distal Intergenic	5
GNA12	-1.37	0.00221	0.0461	ENSG00000146535.13	ENST00000275364.7	-12252	no_CPG	2856576	2857576	4.17	Distal Intergenic	7
CTD-2337A12.1	-1.37	0.00247	0.0483	ENSG00000251314.2	ENST00000513158.1	-10885	no_CPG	96572608	96573608	4.04	Intron (ENST00000502645.2/ENSG00000251314.2, intron 4 of 4)	5
KB-1568E2.1	-1.37	0.00255	0.049	ENSG00000253656.1	ENST00000523502.1	50518	no_CPG	130604194	130605194	6.19	Intron (ENST00000523502.1/ENSG00000253656.1, intron 1 of 2)	8
RP11-143E21.6	-1.36	0.000127	0.0136	ENSG00000259862.1	ENST00000563922.1	4465	no_CPG	130254144	130255144	5.39	Intron (ENST00000563922.1/ENSG00000259862.1, intron 1 of 1)	12
ANXA1	-1.36	0.000255	0.0195	ENSG00000135046.13	ENST00000491192.1	8193	no_CPG	73176291	73177291	5.12	Distal Intergenic	9
COG3	-1.36	0.000462	0.0253	ENSG00000136152.14	ENST00000465942.1	9061	no_CPG	45500530	45501530	4.73	Intron (ENST00000349995.9/ENSG00000136152.14, intron 13 of 22)	13
RP5-968J1.1	-1.36	0.000692	0.0292	ENSG00000230839.1	ENST00000447206.1	481	no_CPG	1816125	1817125	4.95	Promoter (<=1kb)	20
MED30	-1.36	0.00141	0.0386	ENSG00000164758.7	ENST00000519391.1	280460	no_CPG	117810824	117811824	4.76	Intron (ENST00000378204.6/ENSG00000182197.10, intron 8 of 10)	8
CDCP2	-1.36	0.00143	0.0387	ENSG00000157211.11	ENST00000371330.1	-4066	no_CPG	54157836	54158836	4.24	Intron (ENST00000637610.1/ENSG00000256407.2, intron 3 of 9)	1
RP11-699L21.2	-1.36	0.00172	0.0418	ENSG00000238043.1	ENST00000426616.1	-32911	no_CPG	193946703	193947703	6.32	Distal Intergenic	3
HNRNPCP6	-1.36	0.00183	0.0429	ENSG00000213305.3	ENST00000525816.1	-55002	no_CPG	85076657	85077657	4.16	Intron (ENST00000376104.6/ENSG00000150672.16, intron 6 of 27)	11
LONP2	-1.36	0.00233	0.0473	ENSG00000102910.13	ENST00000565867.2	-15932	no_CPG	48317380	48318380	4.46	Intron (ENST00000285737.8/ENSG00000102910.13, intron 11 of 14)	16
AC112715.2	-1.35	0.000362	0.0227	ENSG00000224132.2	ENST00000445534.2	24792	no_CPG	237281883	237282883	5.07	Distal Intergenic	2
ST3GAL2	-1.35	0.0009	0.0325	ENSG00000157350.12	ENST00000561708.1	-4741	no_CPG	70427814	70428814	5.11	Intron (ENST00000342907.2/ENSG00000157350.12, intron 1 of 6)	16
AC106870.1	-1.35	0.00171	0.0417	ENSG00000230737.1	ENST00000421411.1	-55216	no_CPG	29834155	29835155	4.42	Intron (ENST00000389048.7/ENSG00000171094.15, intron 1 of 28)	2
RPS26P21	-1.34	0.000621	0.0281	ENSG00000242829.1	ENST00000475397.1	11122	no_CPG	119309787	119310787	5.9	Intron (ENST00000264245.8/ENSG00000031081.10, intron 1 of 11)	3
FLT1P1	-1.34	0.00111	0.0355	ENSG00000229515.1	ENST00000451650.1	33767	no_CPG	46108910	46109910	4.4	Distal Intergenic	3
SLC22A23	-1.34	0.00135	0.0381	ENSG00000137266.14	ENST00000436008.6	-31964	no_CPG	3488986	3489986	5.02	Distal Intergenic	6
RAD23BP2	-1.34	0.00152	0.0396	ENSG00000230244.1	ENST00000416003.1	13380	no_CPG	83676799	83677799	5.29	Distal Intergenic	7
RNA5SP237	-1.34	0.00158	0.0403	ENSG00000222346.1	ENST00000410414.1	33246	no_CPG	111919519	111920519	4.55	Intron (ENST00000428084.5/ENSG00000128512.19, intron 12 of 52)	7
PTPN4	-1.34	0.002	0.0446	ENSG00000088179.8	ENST00000433888.5	-56308	no_CPG	119820015	119821015	5	Intron (ENST00000263708.6/ENSG00000088179.8, intron 2 of 26)	2
LINC00494	-1.34	0.0021	0.0454	ENSG00000235621.8	ENST00000416742.5	-66456	no_CPG	48292494	48293494	4.09	Distal Intergenic	20
KCNA5	-1.33	9.85e-05	0.0118	ENSG00000130037.4	ENST00000252321.4	44584	no_CPG	5088573	5089573	5.5	Distal Intergenic	12
MIR585	-1.33	0.000134	0.0139	ENSG00000207619.1	ENST00000384887.1	101918	no_CPG	169160776	169161776	6.26	Intron (ENST00000519560.5/ENSG00000184347.14, intron 4 of 35)	5
RPL32P33	-1.33	0.000298	0.0209	ENSG00000243514.2	ENST00000487023.2	-3801	no_CPG	72622430	72623430	5.76	Intron (ENST00000581549.1/ENSG00000227036.6, intron 2 of 4)	17
L3MBTL4	-1.33	0.000864	0.032	ENSG00000154655.15	ENST00000400105.6	-2360	no_CPG	6370043	6371043	4.79	Promoter (2-3kb)	18
RP11-252I14.2	-1.33	0.00107	0.0352	ENSG00000253908.1	ENST00000523026.1	1297	no_CPG	180258977	180259977	5.24	Promoter (1-2kb)	5
MIR6070	-1.33	0.00132	0.0378	ENSG00000278433.1	ENST00000613967.1	0	no_CPG	43609217	43610217	4.53	Promoter (<=1kb)	21
MBP	-1.33	0.00169	0.0416	ENSG00000197971.14	ENST00000581878.5	0	no_CPG	77127660	77128660	4.71	Promoter (<=1kb)	18
CLOCK	-1.33	0.0024	0.0479	ENSG00000134852.14	ENST00000513440.5	-2401	no_CPG	55549539	55550539	4.74	Promoter (2-3kb)	4
RPS4XP2	-1.32	0.000213	0.0179	ENSG00000226948.1	ENST00000458402.1	15804	no_CPG	4613415	4614415	5.25	Distal Intergenic	20
RN7SKP180	-1.32	0.000424	0.0247	ENSG00000200783.1	ENST00000363913.1	-19357	no_CPG	72683509	72684509	5.9	Intron (ENST00000255559.7/ENSG00000133195.11, intron 7 of 9)	17
RP11-272J7.6	-1.32	0.000723	0.0297	ENSG00000271173.1	ENST00000603304.1	-19491	no_CPG	43707726	43708726	5.35	Distal Intergenic	10
LINC01158	-1.32	0.000738	0.0298	ENSG00000233639.5	ENST00000443988.5	25369	no_CPG	104825084	104826084	4.78	Intron (ENST00000413121.5/ENSG00000233639.5, intron 1 of 3)	2
RP1-205F14P.1	-1.32	0.00146	0.0391	ENSG00000280445.1	ENST00000625043.1	28274	no_CPG	27385931	27386931	4.87	Distal Intergenic	22
SEMA3A	-1.32	0.00149	0.0394	ENSG00000075213.10	ENST00000265362.8	168830	no_CPG	84025071	84026071	5.85	Intron (ENST00000265362.8/ENSG00000075213.10, intron 6 of 16)	7
RP11-775E10.1	-1.32	0.00156	0.0399	ENSG00000253237.2	ENST00000520293.2	15734	no_CPG	80366866	80367866	4.86	Distal Intergenic	8
STEAP3	-1.32	0.00161	0.0406	ENSG00000115107.19	ENST00000393106.6	-14378	no_CPG	119208453	119209453	5.43	Distal Intergenic	2
RN7SKP279	-1.32	0.00176	0.0423	ENSG00000223315.1	ENST00000411383.1	77378	no_CPG	127485229	127486229	4.21	Distal Intergenic	11
RP11-889D3.1	-1.32	0.00203	0.0448	ENSG00000239991.1	ENST00000485347.1	5462	no_CPG	55169270	55170270	4.96	Intron (ENST00000485347.1/ENSG00000239991.1, intron 2 of 2)	3
RP5-899B16.1	-1.32	0.00232	0.0472	ENSG00000231426.5	ENST00000414038.5	-78025	no_CPG	139775825	139776825	4.16	Distal Intergenic	6
SVIL	-1.31	0.000634	0.0283	ENSG00000197321.14	ENST00000465422.1	-20853	no_CPG	29757634	29758634	4.88	Distal Intergenic	10
SNORA70	-1.31	0.00231	0.0471	ENSG00000252505.1	ENST00000516696.1	-5835	no_CPG	33533205	33534205	4.16	Distal Intergenic	8
CACNB2	-1.3	0.00114	0.0358	ENSG00000165995.18	ENST00000377331.6	16596	no_CPG	18157776	18158776	4.69	Intron (ENST00000324631.11/ENSG00000165995.18, intron 2 of 13)	10
LRRC71	-1.3	0.0016	0.0405	ENSG00000160838.13	ENST00000476550.1	-451	no_CPG	156925911	156926911	4.23	Promoter (<=1kb)	1
MYO18B	-1.29	0.000128	0.0136	ENSG00000133454.15	ENST00000407587.6	4863	no_CPG	25747097	25748097	6.15	Intron (ENST00000536101.5/ENSG00000133454.15, intron 1 of 42)	22
ITIH4	-1.29	0.0011	0.0355	ENSG00000055955.15	ENST00000473904.1	0	no_CPG	52831249	52832249	4.74	Promoter (<=1kb)	3
GAPDHP27	-1.29	0.00201	0.0448	ENSG00000239873.2	ENST00000447427.2	4943	no_CPG	119553831	119554831	5.19	Distal Intergenic	1
LINC01332	-1.29	0.00211	0.0454	ENSG00000250446.1	ENST00000506612.1	-51875	no_CPG	74386641	74387641	4.51	Intron (ENST00000507781.1/ENSG00000248673.1, intron 2 of 2)	5
PXN	-1.29	0.00246	0.0483	ENSG00000089159.16	ENST00000458477.6	-6733	no_CPG	120256894	120257894	4.38	Intron (ENST00000267257.11/ENSG00000089159.16, intron 1 of 10)	12
ASAP1	-1.28	0.000365	0.0229	ENSG00000153317.14	ENST00000518721.5	-89139	no_CPG	130532799	130533799	5.1	Distal Intergenic	8
LINC00511	-1.28	0.000617	0.028	ENSG00000227036.6	ENST00000580861.1	-5653	no_CPG	72609161	72610161	5.32	Intron (ENST00000581549.1/ENSG00000227036.6, intron 3 of 4)	17
CTC-470E21.1	-1.28	0.000781	0.0306	ENSG00000248350.1	ENST00000513509.1	24317	no_CPG	112338349	112339349	4.7	Intron (ENST00000621003.4/ENSG00000129595.12, intron 1 of 22)	5
MAP1LC3B2	-1.28	0.000821	0.0314	ENSG00000258102.3	ENST00000556529.2	0	no_CPG	116559175	116560175	4.65	Promoter (<=1kb)	12
ABCB9	-1.28	0.000907	0.0326	ENSG00000150967.17	ENST00000546289.5	0	no_CPG	122944270	122945270	5.26	Promoter (<=1kb)	12
TMA16P2	-1.28	0.00171	0.0416	ENSG00000232467.2	ENST00000413187.2	-24235	no_CPG	45871829	45872829	4.89	Intron (ENST00000470809.1/ENSG00000086015.20, intron 3 of 4)	1
RP11-372M18.2	-1.28	0.00226	0.0466	ENSG00000231648.1	ENST00000443636.1	-2286	no_CPG	209364376	209365376	4.53	Promoter (2-3kb)	1
RP11-798L4.1	-1.27	0.000478	0.0254	ENSG00000205682.2	ENST00000381217.2	-33934	no_CPG	61462155	61463155	5.07	Intron (ENST00000512091.6/ENSG00000150471.16, intron 2 of 25)	4
THSD7A	-1.27	0.00114	0.0358	ENSG00000005108.15	ENST00000497575.1	1847	no_CPG	11540212	11541212	4.9	Promoter (1-2kb)	7
RNU6-1255P	-1.27	0.00142	0.0386	ENSG00000200304.1	ENST00000363434.1	1060	no_CPG	130067592	130068592	5.4	Promoter (1-2kb)	8
RP11-813I20.2	-1.27	0.00154	0.0399	ENSG00000258784.1	ENST00000554458.1	4456	no_CPG	55752664	55753664	4.69	Intron (ENST00000554458.1/ENSG00000258784.1, intron 1 of 3)	14
TNS3	-1.27	0.00156	0.0399	ENSG00000136205.16	ENST00000428457.1	51904	no_CPG	47227414	47228414	4.77	Distal Intergenic	7
IGFL4	-1.27	0.00194	0.044	ENSG00000204869.8	ENST00000596694.1	-3081	no_CPG	46080199	46081199	4.75	Distal Intergenic	19
MCC	-1.27	0.00227	0.0467	ENSG00000171444.17	ENST00000624689.3	4053	no_CPG	113058987	113059987	5.23	Intron (ENST00000302475.8/ENSG00000171444.17, intron 12 of 16)	5
LINC01119	-1.26	0.000276	0.0203	ENSG00000239332.5	ENST00000468141.2	978	no_CPG	46846854	46847854	5.38	Promoter (<=1kb)	2
AC110926.4	-1.26	0.00122	0.0368	ENSG00000226789.1	ENST00000412499.1	6803	no_CPG	127254061	127255061	4.91	Downstream (2-3kb)	2
NTRK2	-1.26	0.0015	0.0395	ENSG00000148053.15	ENST00000359847.3	180945	no_CPG	84851605	84852605	4.69	Intron (ENST00000376213.5/ENSG00000148053.15, intron 14 of 19)	9
CTC-497E21.5	-1.26	0.00225	0.0465	ENSG00000255558.1	ENST00000531136.1	-5103	no_CPG	13139942	13140942	5.69	Distal Intergenic	11
MIR606	-1.26	0.00242	0.0479	ENSG00000207583.1	ENST00000384851.1	-4454	no_CPG	75547004	75548004	4.77	Intron (ENST00000611255.4/ENSG00000148655.14, intron 2 of 6)	10
CRISPLD2	-1.25	0.00058	0.0273	ENSG00000103196.11	ENST00000566789.1	1695	no_CPG	84850912	84851912	5.88	Promoter (1-2kb)	16
TFAMP1	-1.25	0.00119	0.0365	ENSG00000230444.1	ENST00000412727.1	-2272	no_CPG	1611318	1612318	5.52	Promoter (2-3kb)	7
DGKG	-1.25	0.00125	0.0371	ENSG00000058866.14	ENST00000490452.5	31898	no_CPG	186209739	186210739	4.81	Intron (ENST00000265022.7/ENSG00000058866.14, intron 21 of 24)	3
NUAK2	-1.25	0.00131	0.0378	ENSG00000163545.8	ENST00000367157.4	3667	no_CPG	205317124	205318124	4.91	Intron (ENST00000367157.4/ENSG00000163545.8, intron 1 of 6)	1
ALG1L13P	-1.25	0.0016	0.0405	ENSG00000253981.5	ENST00000523017.5	-65577	no_CPG	8310244	8311244	5.19	Distal Intergenic	8
RNMTL1P1	-1.25	0.00202	0.0448	ENSG00000231553.1	ENST00000454103.1	4440	no_CPG	21398473	21399473	4.91	Distal Intergenic	10
SCARA5	-1.24	0.000446	0.0251	ENSG00000168079.16	ENST00000354914.7	-11484	no_CPG	28004211	28005211	6.15	Distal Intergenic	8
RP11-675F6.4	-1.24	0.00118	0.0364	ENSG00000254100.1	ENST00000519764.1	792	no_CPG	38557228	38558228	4.99	Promoter (<=1kb)	8
AC106869.2	-1.24	0.0019	0.0436	ENSG00000226087.1	ENST00000444361.1	0	no_CPG	47225152	47226152	4.83	Promoter (<=1kb)	2
NCK2	-1.24	0.00214	0.0458	ENSG00000071051.13	ENST00000233154.8	-93776	no_CPG	105650121	105651121	4.7	Distal Intergenic	2
AC097713.5	-1.24	0.00238	0.0478	ENSG00000237784.1	ENST00000430199.1	33250	no_CPG	234362733	234363733	4.59	Distal Intergenic	2
RP11-13J12.2	-1.24	0.00265	0.05	ENSG00000279931.1	ENST00000624500.1	-4029	no_CPG	124720495	124721495	5.65	Distal Intergenic	12
LINC00972	-1.23	0.000409	0.0243	ENSG00000225128.1	ENST00000422448.1	14051	no_CPG	85489278	85490278	5.56	Exon (ENST00000438065.1/ENSG00000225128.1, exon 4 of 4)	7
IQCJ-SCHIP1	-1.23	0.0022	0.046	ENSG00000283154.1	ENST00000485419.6	12840	no_CPG	159082273	159083273	4.42	Intron (ENST00000481796.1/ENSG00000214216.10, intron 1 of 2)	3
LINC00877	-1.23	0.00223	0.0463	ENSG00000241163.7	ENST00000608654.5	-22652	no_CPG	72123726	72124726	5.26	Intron (ENST00000469218.5/ENSG00000241163.7, intron 1 of 2)	3
RP1-205F14P.1	-1.22	9.8e-05	0.0118	ENSG00000280445.1	ENST00000623572.1	-863	no_CPG	27420576	27421576	6.19	Promoter (<=1kb)	22
RP11-269G24.6	-1.22	0.000974	0.0337	ENSG00000265971.1	ENST00000582741.1	7171	no_CPG	63462164	63463164	4.96	Distal Intergenic	17
CXCL13	-1.22	0.00132	0.0378	ENSG00000156234.7	ENST00000286758.4	26183	no_CPG	77537936	77538936	4.88	Intron (ENST00000286758.4/ENSG00000156234.7, intron 1 of 4)	4
RP11-15E18.3	-1.22	0.00231	0.0471	ENSG00000267678.1	ENST00000589465.1	7044	no_CPG	60554117	60555117	5.48	Distal Intergenic	17
TLN2	-1.21	0.00118	0.0364	ENSG00000171914.15	ENST00000636159.1	16420	no_CPG	62606100	62607100	6.08	Intron (ENST00000561197.5/ENSG00000171914.15, intron 2 of 2)	15
PRKCH	-1.21	0.0013	0.0376	ENSG00000027075.13	ENST00000555185.5	-2856	no_CPG	61183703	61184703	4.8	Promoter (2-3kb)	14
RP11-411G2.1	-1.21	0.00135	0.0381	ENSG00000274879.1	ENST00000400949.4	14935	no_CPG	114914000	114915000	5.6	Distal Intergenic	12
PCAT29	-1.21	0.00148	0.0393	ENSG00000259641.5	ENST00000558411.1	-12657	no_CPG	69578472	69579472	4.93	Distal Intergenic	15
CTD-2124B20.3	-1.21	0.00209	0.0454	ENSG00000265174.1	ENST00000582386.1	3226	no_CPG	6561048	6562048	4.65	Intron (ENST00000584361.1/ENSG00000265944.1, intron 2 of 5)	18
MMP2	-1.21	0.00241	0.0479	ENSG00000087245.12	ENST00000566564.1	-1851	no_CPG	55502524	55503524	5.02	Promoter (1-2kb)	16
RP11-340M11.1	-1.21	0.00258	0.0492	ENSG00000258133.1	ENST00000552027.1	30499	no_CPG	58425095	58426095	4.54	Distal Intergenic	12
FOXS1	-1.2	0.000732	0.0298	ENSG00000179772.7	ENST00000375978.4	8847	no_CPG	31835772	31836772	5.22	Distal Intergenic	20
MN1	-1.2	0.0011	0.0354	ENSG00000169184.5	ENST00000302326.4	-19304	no_CPG	27820802	27821802	5.2	Distal Intergenic	22
ISCA1P6	-1.2	0.00165	0.0411	ENSG00000227653.1	ENST00000427740.1	-17729	no_CPG	128536906	128537906	5.3	Distal Intergenic	2
TPST2	-1.19	0.000637	0.0284	ENSG00000128294.15	ENST00000442495.5	4373	no_CPG	26584752	26585752	6.48	Intron (ENST00000338754.8/ENSG00000128294.15, intron 1 of 6)	22
RP11-508M8.1	-1.19	0.000894	0.0324	ENSG00000249365.1	ENST00000512965.1	26145	no_CPG	125134349	125135349	5.62	Intron (ENST00000512965.1/ENSG00000249365.1, intron 1 of 1)	5
CCIN	-1.19	0.00125	0.0371	ENSG00000185972.5	ENST00000335119.3	-5479	no_CPG	36162915	36163915	5	3' UTR	9
TPCN2	-1.19	0.00143	0.0386	ENSG00000162341.16	ENST00000637084.1	2301	no_CPG	69075216	69076216	5.45	Promoter (2-3kb)	11
CTA-503F6.2	-1.18	0.000145	0.0145	ENSG00000238195.1	ENST00000427360.1	8135	no_CPG	27212346	27213346	6.78	Distal Intergenic	22
NFIA-AS1	-1.18	0.000634	0.0283	ENSG00000237853.6	ENST00000596404.1	-33924	no_CPG	61287434	61288434	5.28	Intron (ENST00000371191.5/ENSG00000162599.15, intron 3 of 10)	1
RP11-644K8.1	-1.17	0.00212	0.0455	ENSG00000223734.2	ENST00000452342.2	13727	no_CPG	20065861	20066861	5.05	Intron (ENST00000430429.1/ENSG00000234378.1, intron 1 of 1)	2
MIATNB	-1.17	0.00229	0.047	ENSG00000244625.5	ENST00000417083.1	45905	no_CPG	26763274	26764274	5.66	Intron (ENST00000450963.5/ENSG00000244625.5, intron 3 of 4)	22
SLC2A12	-1.16	0.0011	0.0355	ENSG00000146411.5	ENST00000275230.5	16147	no_CPG	134035489	134036489	5.58	Intron (ENST00000275230.5/ENSG00000146411.5, intron 1 of 4)	6
GPRIN2	-1.15	0.00113	0.0357	ENSG00000204175.5	ENST00000374314.5	29023	no_CPG	46520721	46521721	5.31	Intron (ENST00000616785.1/ENSG00000264230.7, intron 3 of 3)	10
GFOD1	-1.15	0.00219	0.0459	ENSG00000145990.10	ENST00000379284.1	0	no_CPG	13407471	13408471	4.89	Promoter (<=1kb)	6
MAP2K1P1	-1.14	0.000429	0.0248	ENSG00000254013.1	ENST00000519737.1	-6948	no_CPG	30019765	30020765	6.53	Distal Intergenic	8
RNU1-108P	-1.14	0.000691	0.0292	ENSG00000199426.1	ENST00000362556.1	855	no_CPG	58664842	58665842	5.77	Promoter (<=1kb)	17
RPL23AP34	-1.14	0.00204	0.0449	ENSG00000225991.1	ENST00000423483.1	-82843	no_CPG	28224318	28225318	5.35	Intron (ENST00000344773.6/ENSG00000158019.20, intron 7 of 12)	2
AP001891.1	-1.11	0.00126	0.0372	ENSG00000236437.1	ENST00000452629.1	71975	no_CPG	116427655	116428655	5.76	Distal Intergenic	11
AC016735.1	-1.11	0.00162	0.0407	ENSG00000224739.2	ENST00000457457.2	18280	no_CPG	42986780	42987780	5.21	Distal Intergenic	2
AC017078.1	-1.1	0.00205	0.045	ENSG00000233829.1	ENST00000416146.1	-32412	no_CPG	46036721	46037721	5.45	Intron (ENST00000306156.7/ENSG00000171132.13, intron 10 of 14)	2
CTD-2541M15.3	-1.09	0.00263	0.0498	ENSG00000271743.1	ENST00000607368.1	22407	no_CPG	6593791	6594791	5.32	Intron (ENST00000344683.9/ENSG00000147316.12, intron 12 of 13)	8
LINC01422	-1.08	0.00155	0.0399	ENSG00000223704.1	ENST00000434868.1	-52964	no_CPG	26804670	26805670	5.48	Distal Intergenic	22
RP11-557C18.3	-1.08	0.00228	0.0468	ENSG00000253607.1	ENST00000521258.1	-7338	no_CPG	122994222	122995222	5.32	Distal Intergenic	8
AC016735.1	-1.05	0.00238	0.0478	ENSG00000224739.2	ENST00000457457.2	40950	no_CPG	42964110	42965110	5.52	Distal Intergenic	2
C10orf11	-1.05	0.00261	0.0496	ENSG00000148655.14	ENST00000611306.1	50627	no_CPG	76086633	76087633	5.17	Intron (ENST00000611255.4/ENSG00000148655.14, intron 5 of 6)	10
RP5-1172A22.1	-1.02	0.00194	0.044	ENSG00000233521.5	ENST00000418271.1	242	no_CPG	27223415	27224415	6.9	Promoter (<=1kb)	22

## Sheet: up
gene_name	Fold	p.value	FDR	geneId	transcriptId	distanceToTSS	CPG	start	end	Conc	annotation	geneChr
PWWP2B	3.51	5.41e-05	0.00868	ENSG00000171813.13	ENST00000631148.2	0	CPG_ov	132396320	132397320	2.6	Promoter (<=1kb)	10
PER1	3.12	1.22e-05	0.00327	ENSG00000179094.14	ENST00000583677.1	891	no_CPG	8140300	8141300	2.84	Promoter (<=1kb)	17
HLA-F	3	0.000677	0.029	ENSG00000229698.11	ENST00000444891.5	0	no_CPG	1029030	1030030	2.16	Promoter (<=1kb)	43
FBXO25	2.99	4.68e-06	0.0017	ENSG00000147364.16	ENST00000518240.5	0	CPG_ov	406260	407260	3.67	Promoter (<=1kb)	8
CH17-232I21.1	2.89	0.00156	0.04	ENSG00000275121.1	ENST00000621495.1	0	CPG_ov	75237338	75238338	2.53	Promoter (<=1kb)	7
KDM2B	2.51	8.04e-05	0.0107	ENSG00000089094.17	ENST00000538243.1	2847	CPG_ov	121466706	121467706	4.75	Promoter (2-3kb)	12
RP5-963E22.5	2.51	0.000981	0.0338	ENSG00000260416.1	ENST00000567259.1	-5053	no_CPG	63134512	63135512	1.68	Distal Intergenic	20
PKD1P6	2.51	0.00163	0.0408	ENSG00000282086.1	ENST00000631913.1	-2002	no_CPG	530754	531754	1.64	Promoter (2-3kb)	206
AP2A2	2.5	0.000353	0.0225	ENSG00000183020.13	ENST00000332231.9	0	CPG_ov	925477	926477	3.46	Promoter (<=1kb)	11
CCDC92	2.49	7.17e-05	0.0101	ENSG00000119242.8	ENST00000238156.7	0	CPG_ov	123972199	123973199	5.86	Promoter (<=1kb)	12
BPIFB2	2.46	0.000264	0.0197	ENSG00000078898.6	ENST00000170150.3	9003	no_CPG	33016603	33017603	2.56	Exon (ENST00000170150.3/ENSG00000078898.6, exon 7 of 16)	20
KLF16	2.43	0.000324	0.0217	ENSG00000129911.8	ENST00000541015.5	0	CPG_ov	1863338	1864338	5.08	Promoter (<=1kb)	19
CUL1	2.42	0.000126	0.0136	ENSG00000055130.15	ENST00000325222.8	0	CPG_ov	148698654	148699654	4.4	Promoter (<=1kb)	7
MIR212	2.41	0.000566	0.0271	ENSG00000267195.1	ENST00000586026.1	0	CPG_ov	2049843	2050843	4.38	Promoter (<=1kb)	17
GARNL3	2.4	8.91e-05	0.0114	ENSG00000136895.18	ENST00000446764.5	0	CPG_ov	127224785	127225785	5.1	Promoter (<=1kb)	9
HIVEP2	2.39	1.75e-05	0.00421	ENSG00000010818.8	ENST00000367603.6	0	CPG_ov	142944949	142945949	6.64	Promoter (<=1kb)	6
LTBP3	2.38	0.000298	0.0209	ENSG00000168056.15	ENST00000532661.5	0	CPG_ov	65540369	65541369	3.2	Promoter (<=1kb)	11
RP11-379B18.6	2.36	5.65e-05	0.00889	ENSG00000272840.1	ENST00000610060.1	-7152	CPG_ov	125766562	125767562	1.36	Distal Intergenic	3
STK24	2.35	0.000146	0.0146	ENSG00000102572.14	ENST00000539966.5	0	CPG_ov	98576195	98577195	4.5	Promoter (<=1kb)	13
FAM57A	2.35	0.000807	0.0312	ENSG00000167695.14	ENST00000574327.1	0	CPG_ov	731661	732661	3.87	Promoter (<=1kb)	17
R3HDM4	2.32	0.000333	0.022	ENSG00000198858.9	ENST00000586080.1	137	CPG_ov	900099	901099	3.56	Promoter (<=1kb)	19
ZMYND11	2.32	0.000343	0.0223	ENSG00000015171.18	ENST00000403354.5	0	CPG_ov	135082	136082	3.6	Promoter (<=1kb)	10
CELF5	2.3	0.000672	0.029	ENSG00000161082.12	ENST00000292672.6	0	CPG_ov	3224574	3225574	4.07	Promoter (<=1kb)	19
TBC1D24	2.28	1.01e-05	0.0029	ENSG00000162065.12	ENST00000567020.6	-216	CPG_ov	2473835	2474835	6.01	Promoter (<=1kb)	16
LONP1	2.27	0.000688	0.0292	ENSG00000196365.11	ENST00000589473.1	-2948	no_CPG	5697494	5698494	2.85	Promoter (2-3kb)	19
UBTF	2.25	0.000142	0.0144	ENSG00000108312.14	ENST00000533177.5	0	CPG_ov	44218896	44219896	6.78	Promoter (<=1kb)	17
MRPL41	2.25	0.000425	0.0247	ENSG00000182154.7	ENST00000371443.5	0	CPG_ov	137550902	137551902	5.05	Promoter (<=1kb)	9
SMIM1	2.25	0.00249	0.0485	ENSG00000235169.7	ENST00000444870.6	0	CPG_ov	3771938	3772938	4.64	Promoter (<=1kb)	1
FGFR3	2.23	0.00015	0.0148	ENSG00000068078.17	ENST00000260795.6	0	CPG_ov	1793757	1794757	4.25	Promoter (<=1kb)	4
STRBP	2.2	9.16e-05	0.0115	ENSG00000165209.18	ENST00000348403.9	0	CPG_ov	123267830	123268830	3.6	Promoter (<=1kb)	9
BRWD1	2.2	0.000229	0.0183	ENSG00000185658.13	ENST00000333229.6	0	CPG_ov	39312988	39313988	4.85	Promoter (<=1kb)	21
SKI	2.2	0.0009	0.0325	ENSG00000157933.9	ENST00000378536.4	-644	CPG_ov	2227051	2228051	3.45	Promoter (<=1kb)	1
USP10	2.17	3.31e-05	0.00649	ENSG00000103194.15	ENST00000219473.11	0	CPG_ov	84699221	84700221	5.54	Promoter (<=1kb)	16
CBL	2.17	0.000194	0.017	ENSG00000110395.6	ENST00000264033.5	0	CPG_ov	119205535	119206535	6.06	Promoter (<=1kb)	11
SLC44A2	2.17	0.000272	0.0202	ENSG00000129353.14	ENST00000590382.5	0	CPG_ov	10602152	10603152	4.75	Promoter (<=1kb)	19
ATXN2L	2.16	8.04e-05	0.0107	ENSG00000168488.18	ENST00000563314.5	0	CPG_ov	28822895	28823895	8.11	Promoter (<=1kb)	16
BCL9	2.15	4.75e-05	0.00806	ENSG00000116128.10	ENST00000497938.1	0	CPG_ov	147599422	147600422	7.41	Promoter (<=1kb)	1
MFSD10	2.15	0.00081	0.0313	ENSG00000109736.14	ENST00000514800.5	0	CPG_ov	2933651	2934651	4.02	Promoter (<=1kb)	4
LLNLR-304A6.2	2.15	0.000819	0.0314	ENSG00000275468.1	ENST00000615016.1	0	no_CPG	2014010	2015010	4.11	Promoter (<=1kb)	19
FUOM	2.14	0.000217	0.0179	ENSG00000148803.11	ENST00000278025.8	0	CPG_ov	133357395	133358395	5.89	Promoter (<=1kb)	10
KCMF1	2.14	0.000466	0.0253	ENSG00000176407.17	ENST00000456682.1	0	CPG_ov	84970727	84971727	5.54	Promoter (<=1kb)	2
RP11-638I2.6	2.14	0.000746	0.03	ENSG00000258504.2	ENST00000555428.1	-4854	CPG_ov	100285263	100286263	5.25	Intron (ENST00000553954.1/ENSG00000259052.1, intron 1 of 1)	14
SMURF1	2.13	4.79e-05	0.0081	ENSG00000198742.9	ENST00000361368.6	0	CPG_ov	99143190	99144190	6.24	Promoter (<=1kb)	7
AGFG1	2.13	6.67e-05	0.00986	ENSG00000173744.17	ENST00000409979.6	0	CPG_ov	227472150	227473150	5.87	Promoter (<=1kb)	2
KIAA0232	2.13	0.000136	0.014	ENSG00000170871.11	ENST00000307659.5	262	CPG_ov	6783002	6784002	6.93	Promoter (<=1kb)	4
RP11-123O10.4	2.13	0.000154	0.0151	ENSG00000256248.1	ENST00000535721.1	0	CPG_ov	67068477	67069477	5.99	Promoter (<=1kb)	12
GCNT2	2.13	0.00141	0.0386	ENSG00000111846.15	ENST00000379597.7	0	no_CPG	10527801	10528801	3.19	Promoter (<=1kb)	6
ZFX	2.12	0.000614	0.0279	ENSG00000005889.15	ENST00000428571.5	0	CPG_ov	24149626	24150626	5.29	Promoter (<=1kb)	23
PPP1CA	2.12	0.00108	0.0353	ENSG00000172531.14	ENST00000312989.11	0	CPG_ov	67401242	67402242	5.75	Promoter (<=1kb)	11
HDAC2	2.11	9.85e-05	0.0118	ENSG00000196591.11	ENST00000519065.5	0	CPG_ov	113970604	113971604	6.21	Promoter (<=1kb)	6
ZNF618	2.11	0.000125	0.0135	ENSG00000157657.14	ENST00000374126.9	0	CPG_ov	113876165	113877165	4.21	Promoter (<=1kb)	9
SLC25A1	2.11	0.000245	0.0191	ENSG00000100075.9	ENST00000215882.9	0	CPG_ov	19178297	19179297	5.86	Promoter (<=1kb)	22
ACVR2B	2.11	0.00034	0.0222	ENSG00000114739.13	ENST00000465020.5	0	CPG_ov	38453933	38454933	5.26	Promoter (<=1kb)	3
NRSN2	2.1	4.38e-05	0.00778	ENSG00000125841.12	ENST00000470439.5	0	CPG_ov	347391	348391	6.67	Promoter (<=1kb)	20
PXN	2.1	0.000195	0.0171	ENSG00000089159.16	ENST00000267257.11	0	CPG_ov	120264969	120265969	3.87	Promoter (<=1kb)	12
RP11-212P7.2	2.1	0.00036	0.0227	ENSG00000273270.1	ENST00000608477.1	0	CPG_ov	128530897	128531897	5.73	Promoter (<=1kb)	7
LINC00115	2.1	0.000544	0.0267	ENSG00000225880.5	ENST00000473798.1	0	CPG_ov	827100	828100	3.62	Promoter (<=1kb)	1
CTD-3193O13.11	2.1	0.000594	0.0275	ENSG00000268120.1	ENST00000597156.1	-456	CPG_ov	7869105	7870105	4.51	Promoter (<=1kb)	19
KIFC2	2.09	7.93e-06	0.00245	ENSG00000167702.11	ENST00000301332.2	0	CPG_ov	144465404	144466404	7.17	Promoter (<=1kb)	8
CARM1	2.09	0.000113	0.0128	ENSG00000142453.11	ENST00000327064.8	0	CPG_ov	10870684	10871684	5.76	Promoter (<=1kb)	19
RAP1GAP	2.09	0.000222	0.0181	ENSG00000076864.19	ENST00000471600.6	0	CPG_ov	21651036	21652036	3.4	Promoter (<=1kb)	1
UTP14A	2.09	0.000456	0.0253	ENSG00000156697.12	ENST00000498179.1	11036	CPG_ov	129931749	129932749	5.87	Intron (ENST00000432062.1/ENSG00000235189.1, intron 1 of 3)	23
SOGA1	2.08	0.000158	0.0153	ENSG00000149639.14	ENST00000237536.8	56	CPG_ov	36862630	36863630	4.02	Promoter (<=1kb)	20
EBF3	2.08	0.00041	0.0243	ENSG00000108001.13	ENST00000368648.7	0	CPG_ov	129963782	129964782	4.4	Promoter (<=1kb)	10
RP11-44N21.1	2.07	0.000165	0.0155	ENSG00000257556.1	ENST00000548104.1	0	CPG_ov	105092871	105093871	5.22	Promoter (<=1kb)	14
JAK3	2.06	0.000695	0.0292	ENSG00000105639.18	ENST00000527031.5	0	CPG_ov	17847235	17848235	3.55	Promoter (<=1kb)	19
MNT	2.05	9.27e-05	0.0115	ENSG00000070444.14	ENST00000174618.4	0	CPG_ov	2400204	2401204	5.63	Promoter (<=1kb)	17
CTSD	2.05	0.00102	0.0346	ENSG00000117984.13	ENST00000236671.6	0	CPG_ov	1763380	1764380	3.77	Promoter (<=1kb)	11
RAP1GAP2	2.05	0.00149	0.0394	ENSG00000132359.14	ENST00000542807.1	56558	CPG_ov	2853040	2854040	2.96	Intron (ENST00000637138.1/ENSG00000132359.14, intron 3 of 25)	17
CAPZB	2.03	0.000229	0.0183	ENSG00000077549.17	ENST00000264203.7	0	CPG_ov	19484805	19485805	6.29	Promoter (<=1kb)	1
RP11-281P11.1	2.03	0.00176	0.0422	ENSG00000243635.1	ENST00000486888.1	404474	no_CPG	104907174	104908174	3.04	Distal Intergenic	3
RP11-1398P2.1	2.02	7.35e-05	0.0103	ENSG00000244459.2	ENST00000466692.1	283	CPG_ov	1578970	1579970	6.28	Promoter (<=1kb)	4
UPP2	2.02	0.000215	0.0179	ENSG00000007001.12	ENST00000605860.5	0	CPG_ov	157875750	157876750	6.29	Promoter (<=1kb)	2
REST	2.02	0.000248	0.0192	ENSG00000084093.15	ENST00000612429.4	0	CPG_ov	56907681	56908681	7.02	Promoter (<=1kb)	4
SLC25A43	2.02	0.000903	0.0326	ENSG00000077713.18	ENST00000217909.7	0	CPG_ov	119398916	119399916	4.27	Promoter (<=1kb)	23
CAMK2N1	2.01	8.89e-05	0.0114	ENSG00000162545.5	ENST00000375078.3	0	CPG_ov	20485729	20486729	5.8	Promoter (<=1kb)	1
CTF1	2.01	9.63e-05	0.0118	ENSG00000150281.6	ENST00000279804.2	0	no_CPG	30896107	30897107	7.17	Promoter (<=1kb)	16
MIR17HG	2.01	0.000102	0.012	ENSG00000215417.11	ENST00000582141.5	0	CPG_ov	91347667	91348667	5.19	Promoter (<=1kb)	13
RN7SL316P	2.01	0.000173	0.0158	ENSG00000241631.3	ENST00000483452.3	34129	no_CPG	30667646	30668646	4.98	Intron (ENST00000578265.5/ENSG00000214719.11, intron 4 of 4)	17
BCAP31	2.01	0.000509	0.0259	ENSG00000185825.15	ENST00000458587.6	0	CPG_ov	153723602	153724602	6.73	Promoter (<=1kb)	23
SH2B2	2.01	0.000649	0.0287	ENSG00000160999.10	ENST00000444095.2	0	CPG_ov	102286608	102287608	5.93	Promoter (<=1kb)	7
EPS15L1	2.01	0.000735	0.0298	ENSG00000127527.13	ENST00000602022.5	0	CPG_ov	16471528	16472528	5.22	Promoter (<=1kb)	19
NOL4L	2.01	0.0019	0.0436	ENSG00000197183.13	ENST00000201961.6	435	CPG_ov	32583393	32584393	5.22	Promoter (<=1kb)	20
PPFIA3	2	5.34e-05	0.00867	ENSG00000177380.13	ENST00000602783.1	0	CPG_ov	49149814	49150814	6.68	Promoter (<=1kb)	19
TLK2	2	0.00017	0.0158	ENSG00000146872.17	ENST00000326270.13	0	CPG_ov	62478192	62479192	6.18	Promoter (<=1kb)	17
CSNK1E	2	0.00024	0.0189	ENSG00000213923.10	ENST00000400206.6	0	CPG_ov	38398288	38399288	6.67	Promoter (<=1kb)	22
MLLT10	2	0.000312	0.0213	ENSG00000078403.16	ENST00000377100.7	0	CPG_ov	21533976	21534976	7.69	Promoter (<=1kb)	10
POC1B	2	0.000484	0.0255	ENSG00000139323.13	ENST00000393179.8	0	CPG_ov	89524972	89525972	6.14	Promoter (<=1kb)	12
CELF4	2	0.000598	0.0276	ENSG00000101489.19	ENST00000590011.1	0	CPG_ov	37253772	37254772	3.98	Promoter (<=1kb)	18
TECR	2	0.00137	0.0383	ENSG00000099797.12	ENST00000600395.5	0	no_CPG	14563943	14564943	4.4	Promoter (<=1kb)	19
LRRC3	2	0.00191	0.0436	ENSG00000160233.7	ENST00000291592.5	0	CPG_ov	44455178	44456178	4.73	Promoter (<=1kb)	21
RFX3	1.99	3.86e-06	0.00147	ENSG00000080298.15	ENST00000382004.7	0	CPG_ov	3525674	3526674	6.87	Promoter (<=1kb)	9
ELF2	1.99	0.000189	0.0167	ENSG00000109381.19	ENST00000394235.6	0	CPG_ov	139176996	139177996	7.17	Promoter (<=1kb)	4
NSD1	1.99	0.000208	0.0177	ENSG00000165671.18	ENST00000508896.5	0	CPG_ov	177133374	177134374	5.94	Promoter (<=1kb)	5
PDPK1	1.99	0.000296	0.0209	ENSG00000140992.18	ENST00000342085.8	0	CPG_ov	2537139	2538139	5.98	Promoter (<=1kb)	16
U2	1.99	0.000373	0.0232	ENSG00000274202.1	ENST00000611062.1	-5206	no_CPG	98515	99515	4.71	Distal Intergenic	32
CCAR2	1.99	0.00233	0.0472	ENSG00000158941.16	ENST00000520536.1	1927	no_CPG	22620084	22621084	2.52	Promoter (1-2kb)	8
RP5-875O13.1	1.99	0.00249	0.0485	ENSG00000233421.4	ENST00000415386.2	56	CPG_ov	16534593	16535593	3.11	Promoter (<=1kb)	1
USP45	1.98	2.35e-05	0.00524	ENSG00000123552.17	ENST00000500704.6	0	CPG_ov	99515012	99516012	6.68	Promoter (<=1kb)	6
SELO	1.98	0.000172	0.0158	ENSG00000073169.13	ENST00000611222.1	0	CPG_ov	50200469	50201469	5.32	Promoter (<=1kb)	22
MAZ	1.98	0.00032	0.0216	ENSG00000103495.13	ENST00000616501.4	0	CPG_ov	29806949	29807949	6.5	Promoter (<=1kb)	16
BACH2	1.98	0.000858	0.0319	ENSG00000112182.14	ENST00000257749.8	51	CPG_ov	90295691	90296691	4.36	Promoter (<=1kb)	6
FBXW5	1.98	0.00107	0.0352	ENSG00000159069.13	ENST00000480818.3	0	CPG_ov	136943508	136944508	5.18	Promoter (<=1kb)	9
AK6P1	1.97	4.16e-05	0.00756	ENSG00000256614.1	ENST00000540219.1	86830	CPG_ov	34336311	34337311	6.69	Distal Intergenic	12
NR2C2	1.97	5.85e-05	0.0091	ENSG00000177463.15	ENST00000475707.5	0	CPG_ov	14947756	14948756	6.94	Promoter (<=1kb)	3
ENO1	1.97	9.69e-05	0.0118	ENSG00000074800.13	ENST00000234590.8	0	CPG_ov	8878375	8879375	7.24	Promoter (<=1kb)	1
SLC2A4RG	1.97	0.000108	0.0124	ENSG00000125520.13	ENST00000474248.5	0	CPG_ov	63740215	63741215	6.3	Promoter (<=1kb)	20
CUL4A	1.97	0.000121	0.0133	ENSG00000139842.14	ENST00000451881.5	0	CPG_ov	113208746	113209746	8.07	Promoter (<=1kb)	13
CCDC110	1.97	0.000189	0.0167	ENSG00000168491.9	ENST00000393540.7	0	CPG_ov	185471070	185472070	5.39	Promoter (<=1kb)	4
ZNF846	1.97	0.000607	0.0278	ENSG00000196605.7	ENST00000592587.1	359	CPG_ov	9791738	9792738	5.52	Promoter (<=1kb)	19
RP11-403I13.8	1.97	0.00126	0.0372	ENSG00000272419.5	ENST00000621798.4	0	CPG_ov	145215191	145216191	3.1	Promoter (<=1kb)	1
KIAA2026	1.96	4.52e-05	0.00789	ENSG00000183354.11	ENST00000513355.2	-112	CPG_ov	6008013	6009013	6.71	Promoter (<=1kb)	9
C1QL1	1.96	0.000357	0.0226	ENSG00000131094.3	ENST00000253407.3	0	CPG_ov	44967982	44968982	5.65	Promoter (<=1kb)	17
MREG	1.96	0.000484	0.0255	ENSG00000118242.15	ENST00000620139.4	0	CPG_ov	216013055	216014055	3.71	Promoter (<=1kb)	2
ZMYM2	1.96	0.000528	0.0265	ENSG00000121741.16	ENST00000610343.4	0	CPG_ov	19958157	19959157	7.2	Promoter (<=1kb)	13
FAM120C	1.96	0.000544	0.0267	ENSG00000184083.11	ENST00000375180.6	0	CPG_ov	54182975	54183975	6.4	Promoter (<=1kb)	23
PAK2	1.96	0.000577	0.0273	ENSG00000180370.10	ENST00000327134.7	0	CPG_ov	196739325	196740325	6.88	Promoter (<=1kb)	3
CTBP1	1.96	0.00238	0.0478	ENSG00000159692.15	ENST00000382952.7	0	CPG_ov	1248258	1249258	5.28	Promoter (<=1kb)	4
RP5-866L20.1	1.95	9.22e-05	0.0115	ENSG00000235741.1	ENST00000433377.1	27804	CPG_ov	54488455	54489455	6.91	Distal Intergenic	1
SYNCRIP	1.95	0.000148	0.0147	ENSG00000135316.17	ENST00000355238.10	0	CPG_ov	85642925	85643925	7.53	Promoter (<=1kb)	6
SEMA6B	1.95	0.000285	0.0208	ENSG00000167680.15	ENST00000586582.5	-20936	CPG_ov	4580744	4581744	3.63	Distal Intergenic	19
PKP3	1.95	0.000297	0.0209	ENSG00000184363.9	ENST00000533249.5	0	CPG_ov	393264	394264	5.17	Promoter (<=1kb)	11
NFIL3	1.95	0.000306	0.0213	ENSG00000165030.3	ENST00000297689.3	0	CPG_ov	91423685	91424685	6.12	Promoter (<=1kb)	9
MSI2	1.94	0.000163	0.0155	ENSG00000153944.10	ENST00000284073.6	0	CPG_ov	57256422	57257422	6.76	Promoter (<=1kb)	17
NTNG2	1.94	0.000169	0.0157	ENSG00000196358.10	ENST00000483055.1	0	CPG_ov	132240807	132241807	5.92	Promoter (<=1kb)	9
SMG1P5	1.94	0.000345	0.0224	ENSG00000183604.14	ENST00000529428.5	0	CPG_ov	30334388	30335388	6.33	Promoter (<=1kb)	16
ZYX	1.94	0.000482	0.0254	ENSG00000159840.15	ENST00000322764.9	0	CPG_ov	143380566	143381566	7.1	Promoter (<=1kb)	7
CYTH2	1.94	0.000504	0.0258	ENSG00000105443.13	ENST00000600597.1	12918	CPG_ov	48492844	48493844	5.31	Exon (ENST00000600059.5/ENSG00000142235.8, exon 12 of 15)	19
UBE2R2	1.93	0.000128	0.0136	ENSG00000107341.4	ENST00000263228.3	0	CPG_ov	33816830	33817830	7.49	Promoter (<=1kb)	9
PHACTR2	1.93	0.000137	0.014	ENSG00000112419.14	ENST00000440869.6	0	CPG_ov	143677304	143678304	5.94	Promoter (<=1kb)	6
ROR2	1.93	0.000276	0.0203	ENSG00000169071.14	ENST00000375715.5	0	CPG_ov	91948843	91949843	6.54	Promoter (<=1kb)	9
TTC3	1.93	0.000643	0.0285	ENSG00000182670.13	ENST00000492275.5	0	CPG_ov	37072427	37073427	5.85	Promoter (<=1kb)	21
PIDD1	1.93	0.00106	0.035	ENSG00000177595.17	ENST00000524486.5	0	CPG_ov	804891	805891	4.96	Promoter (<=1kb)	11
RP4-535B20.1	1.93	0.00178	0.0423	ENSG00000231485.1	ENST00000448344.1	136	CPG_ov	65066601	65067601	5.79	Promoter (<=1kb)	1
HIPK3	1.92	0.000111	0.0127	ENSG00000110422.11	ENST00000531504.5	0	CPG_ov	33257660	33258660	7.43	Promoter (<=1kb)	11
PTPMT1	1.92	0.000194	0.017	ENSG00000110536.13	ENST00000426530.2	0	CPG_ov	47565249	47566249	4.58	Promoter (<=1kb)	11
SYDE1	1.92	0.00048	0.0254	ENSG00000105137.12	ENST00000342784.6	0	CPG_ov	15107375	15108375	4.82	Promoter (<=1kb)	19
TONSL	1.92	0.000512	0.0259	ENSG00000160949.16	ENST00000409379.7	0	CPG_ov	144443757	144444757	6.17	Promoter (<=1kb)	8
PRNP	1.92	0.000718	0.0295	ENSG00000171867.16	ENST00000457586.1	42	CPG_ov	4686585	4687585	5.65	Promoter (<=1kb)	20
SLC25A10	1.91	0.000196	0.0171	ENSG00000183048.11	ENST00000545862.5	0	CPG_ov	81711913	81712913	6.45	Promoter (<=1kb)	17
GAMT	1.91	0.000274	0.0202	ENSG00000130005.11	ENST00000252288.6	0	CPG_ov	1400679	1401679	5.54	Promoter (<=1kb)	19
ANP32B	1.91	0.000369	0.023	ENSG00000136938.8	ENST00000339399.4	0	CPG_ov	97983036	97984036	6.93	Promoter (<=1kb)	9
DOK1	1.91	0.000394	0.0237	ENSG00000115325.13	ENST00000488613.1	0	CPG_ov	74554098	74555098	6.97	Promoter (<=1kb)	2
NCOR2	1.91	0.000435	0.0249	ENSG00000196498.13	ENST00000458234.5	0	CPG_ov	124566617	124567617	6.9	Promoter (<=1kb)	12
EZR	1.91	0.00065	0.0287	ENSG00000092820.17	ENST00000476189.1	39	CPG_ov	158818310	158819310	6.35	Promoter (<=1kb)	6
TGIF2	1.91	0.000978	0.0337	ENSG00000118707.9	ENST00000558028.5	0	CPG_ov	36573696	36574696	5.91	Promoter (<=1kb)	20
IL17RA	1.91	0.00122	0.0369	ENSG00000177663.13	ENST00000477874.1	0	CPG_ov	17084351	17085351	6.09	Promoter (<=1kb)	22
OCEL1	1.9	3.49e-05	0.00675	ENSG00000099330.8	ENST00000600826.1	6573	CPG_ov	17234829	17235829	5.53	Exon (ENST00000291442.3/ENSG00000160113.5, exon 3 of 4)	19
DNPEP	1.9	3.97e-05	0.00738	ENSG00000123992.18	ENST00000273075.8	0	CPG_ov	219387280	219388280	6.87	Promoter (<=1kb)	2
RP11-122G18.11	1.9	4.09e-05	0.00748	ENSG00000283317.1	ENST00000636824.1	0	CPG_ov	161440254	161441254	5.79	Promoter (<=1kb)	1
ZFP41	1.9	6.54e-05	0.00977	ENSG00000181638.17	ENST00000520584.5	0	CPG_ov	143246483	143247483	6.94	Promoter (<=1kb)	8
GRK5	1.9	0.000168	0.0157	ENSG00000198873.11	ENST00000392870.2	0	CPG_ov	119207456	119208456	6.12	Promoter (<=1kb)	10
RABL6	1.9	0.00023	0.0184	ENSG00000196642.17	ENST00000371671.9	0	CPG_ov	136807212	136808212	4.78	Promoter (<=1kb)	9
CTD-2308L22.1	1.9	0.000247	0.0192	ENSG00000272944.1	ENST00000609776.1	0	CPG_ov	221572425	221573425	5.92	Promoter (<=1kb)	2
CAMKK1	1.9	0.000684	0.0292	ENSG00000004660.14	ENST00000348335.6	0	CPG_ov	3892796	3893796	6.08	Promoter (<=1kb)	17
IFNAR2	1.9	0.00104	0.0349	ENSG00000159110.19	ENST00000382264.7	0	CPG_ov	33229736	33230736	5.14	Promoter (<=1kb)	21
UBE2F	1.9	0.00116	0.0359	ENSG00000184182.18	ENST00000440223.5	-42432	no_CPG	237923395	237924395	4.19	Distal Intergenic	2
AMFR	1.9	0.00194	0.044	ENSG00000159461.14	ENST00000290649.9	0	CPG_ov	56425206	56426206	4.71	Promoter (<=1kb)	16
KCTD1	1.9	0.00218	0.0459	ENSG00000134504.12	ENST00000408011.7	97	CPG_ov	26548338	26549338	4.87	Promoter (<=1kb)	18
HTT	1.89	0.000206	0.0176	ENSG00000197386.10	ENST00000355072.9	0	CPG_ov	3074036	3075036	6.27	Promoter (<=1kb)	4
ZEB1	1.89	0.000239	0.0188	ENSG00000148516.21	ENST00000320985.14	0	CPG_ov	31318845	31319845	7.22	Promoter (<=1kb)	10
UBE2E3	1.89	0.000297	0.0209	ENSG00000170035.15	ENST00000602959.5	0	CPG_ov	180979860	180980860	6.19	Promoter (<=1kb)	2
CAPG	1.89	0.000319	0.0216	ENSG00000042493.15	ENST00000409275.1	0	CPG_ov	85418131	85419131	6.29	Promoter (<=1kb)	2
RP11-121M22.1	1.89	0.000451	0.0253	ENSG00000175773.12	ENST00000602376.5	0	CPG_ov	130314321	130315321	6.69	Promoter (<=1kb)	11
RAP2C	1.89	0.000754	0.0301	ENSG00000123728.9	ENST00000342983.6	0	CPG_ov	132217126	132218126	6.16	Promoter (<=1kb)	23
GLTSCR1L	1.89	0.00091	0.0326	ENSG00000112624.12	ENST00000314073.9	147	CPG_ov	42782174	42783174	6.69	Promoter (<=1kb)	6
STAG2	1.89	0.00126	0.0372	ENSG00000101972.18	ENST00000371160.5	0	no_CPG	123960935	123961935	5.96	Promoter (<=1kb)	23
RP11-47A8.5	1.88	0.000139	0.0142	ENSG00000272933.1	ENST00000607967.1	1332	CPG_ov	102641808	102642808	6.79	Promoter (1-2kb)	10
ADGRB1	1.88	0.000216	0.0179	ENSG00000181790.10	ENST00000521208.5	279	CPG_ov	142449958	142450958	6.72	Promoter (<=1kb)	8
BMI1	1.88	0.00177	0.0423	ENSG00000168283.13	ENST00000376663.7	0	CPG_ov	22320678	22321678	6.35	Promoter (<=1kb)	10
RNF138	1.87	4.65e-05	0.00798	ENSG00000134758.13	ENST00000261593.7	0	CPG_ov	32091847	32092847	6.98	Promoter (<=1kb)	18
TNK2	1.87	8.62e-05	0.0112	ENSG00000061938.16	ENST00000333602.10	0	CPG_ov	195908182	195909182	5.53	Promoter (<=1kb)	3
ADNP	1.87	0.000245	0.0191	ENSG00000101126.15	ENST00000621696.4	0	CPG_ov	50930271	50931271	6.32	Promoter (<=1kb)	20
FO538757.2	1.87	0.00031	0.0213	ENSG00000279928.1	ENST00000624431.1	-375	no_CPG	181018	182018	6.01	Promoter (<=1kb)	1
NUDT8	1.87	0.000554	0.0269	ENSG00000167799.9	ENST00000301490.8	0	CPG_ov	67629904	67630904	6.57	Promoter (<=1kb)	11
CREBRF	1.87	0.000614	0.0279	ENSG00000164463.12	ENST00000517882.1	0	CPG_ov	173056618	173057618	8.08	Promoter (<=1kb)	5
ZNF827	1.87	0.000661	0.029	ENSG00000151612.15	ENST00000379448.8	1055	CPG_ov	145936416	145937416	5.94	Promoter (1-2kb)	4
AC011899.10	1.87	0.000829	0.0315	ENSG00000231980.1	ENST00000436489.1	70700	CPG_ov	158098073	158099073	4.82	Intron (ENST00000389413.7/ENSG00000155093.17, intron 9 of 21)	7
ATG4D	1.87	0.000923	0.0327	ENSG00000130734.9	ENST00000586417.5	0	CPG_ov	10543352	10544352	5.49	Promoter (<=1kb)	19
CDC34	1.87	0.0013	0.0377	ENSG00000099804.8	ENST00000586788.1	0	CPG_ov	531724	532724	5.2	Promoter (<=1kb)	19
TEAD3	1.87	0.00137	0.0382	ENSG00000007866.18	ENST00000402886.7	0	CPG_ov	35496309	35497309	6.12	Promoter (<=1kb)	6
DAB2IP	1.86	0.000182	0.0164	ENSG00000136848.16	ENST00000489314.1	293	CPG_ov	121598561	121599561	6.14	Promoter (<=1kb)	9
PLA2G15	1.86	0.000203	0.0174	ENSG00000103066.12	ENST00000413021.2	0	CPG_ov	68244873	68245873	5.64	Promoter (<=1kb)	16
BMPR1A	1.86	0.000295	0.0209	ENSG00000107779.12	ENST00000372037.7	0	CPG_ov	86756190	86757190	6.22	Promoter (<=1kb)	10
CYB561	1.86	0.000323	0.0217	ENSG00000008283.15	ENST00000360793.7	0	CPG_ov	63445532	63446532	5.66	Promoter (<=1kb)	17
FRAT2	1.86	0.000382	0.0234	ENSG00000181274.6	ENST00000371019.3	0	CPG_ov	97334445	97335445	5.7	Promoter (<=1kb)	10
RALGDS	1.86	0.00102	0.0345	ENSG00000160271.14	ENST00000372062.7	-8538	no_CPG	133139695	133140695	3.71	Intron (ENST00000393160.7/ENSG00000160271.14, intron 1 of 17)	9
PAN3	1.86	0.00133	0.0379	ENSG00000152520.13	ENST00000503791.5	0	CPG_ov	28138191	28139191	7.06	Promoter (<=1kb)	13
TTC39C	1.86	0.00181	0.0427	ENSG00000168234.12	ENST00000584250.1	0	CPG_ov	24014086	24015086	5.19	Promoter (<=1kb)	18
TRIM62	1.85	7.86e-05	0.0107	ENSG00000116525.13	ENST00000291416.9	91	CPG_ov	33180575	33181575	6.3	Promoter (<=1kb)	1
RCOR3	1.85	0.000336	0.0221	ENSG00000117625.13	ENST00000367006.8	0	CPG_ov	211258890	211259890	7.16	Promoter (<=1kb)	1
RHOG	1.85	0.000421	0.0246	ENSG00000177105.9	ENST00000351018.4	0	CPG_ov	3840849	3841849	7.07	Promoter (<=1kb)	11
PHLDB1	1.85	0.000464	0.0253	ENSG00000019144.17	ENST00000356063.9	21	CPG_ov	118607664	118608664	6.65	Promoter (<=1kb)	11
HOXD8	1.85	0.000501	0.0258	ENSG00000175879.8	ENST00000544999.2	0	CPG_ov	176129879	176130879	6.11	Promoter (<=1kb)	2
RP13-122B23.8	1.85	0.00154	0.0399	ENSG00000260996.1	ENST00000566954.1	0	CPG_ov	137294859	137295859	3.69	Promoter (<=1kb)	9
AES	1.85	0.00227	0.0467	ENSG00000104964.14	ENST00000592330.5	0	CPG_ov	3061229	3062229	4.66	Promoter (<=1kb)	19
MSRB2	1.84	4.25e-05	0.00768	ENSG00000148450.12	ENST00000376510.7	0	CPG_ov	23095473	23096473	6.46	Promoter (<=1kb)	10
KDM6B	1.84	0.000102	0.012	ENSG00000132510.10	ENST00000571047.5	-4659	CPG_ov	7834245	7835245	6.25	Distal Intergenic	17
EPB41L2	1.84	0.00018	0.0162	ENSG00000079819.17	ENST00000530481.5	0	CPG_ov	131062498	131063498	5.75	Promoter (<=1kb)	6
SPATA2L	1.84	0.000202	0.0174	ENSG00000158792.15	ENST00000289805.9	0	CPG_ov	89700816	89701816	5.6	Promoter (<=1kb)	16
BCOR	1.84	0.000697	0.0292	ENSG00000183337.16	ENST00000378444.8	-7873	CPG_ov	40105276	40106276	5.39	Intron (ENST00000378455.8/ENSG00000183337.16, intron 1 of 13)	23
C19orf12	1.84	0.000736	0.0298	ENSG00000131943.17	ENST00000623113.1	0	CPG_ov	29714642	29715642	5.98	Promoter (<=1kb)	19
IL15RA	1.84	0.00183	0.0429	ENSG00000134470.20	ENST00000620345.4	0	CPG_ov	5977230	5978230	4.94	Promoter (<=1kb)	10
FSTL3	1.83	0.000117	0.013	ENSG00000070404.9	ENST00000592947.5	0	CPG_ov	680200	681200	6.87	Promoter (<=1kb)	19
ENO3	1.83	0.000132	0.0137	ENSG00000108515.17	ENST00000519266.5	0	CPG_ov	4947809	4948809	6.35	Promoter (<=1kb)	17
CACNB3	1.83	0.000205	0.0175	ENSG00000167535.7	ENST00000548860.5	0	CPG_ov	48814870	48815870	6.34	Promoter (<=1kb)	12
DDX59	1.83	0.000252	0.0193	ENSG00000118197.13	ENST00000447706.6	0	CPG_ov	200669114	200670114	7.61	Promoter (<=1kb)	1
TNFAIP8L1	1.83	0.000371	0.0231	ENSG00000185361.8	ENST00000327473.8	0	CPG_ov	4638695	4639695	4.92	Promoter (<=1kb)	19
FMNL3	1.83	0.000381	0.0233	ENSG00000161791.13	ENST00000335154.9	0	CPG_ov	49706525	49707525	6.25	Promoter (<=1kb)	12
SP4	1.83	0.000498	0.0258	ENSG00000105866.13	ENST00000222584.7	0	CPG_ov	21427751	21428751	7.98	Promoter (<=1kb)	7
AKAP10	1.83	0.000504	0.0258	ENSG00000108599.14	ENST00000225737.10	0	CPG_ov	19977187	19978187	6.58	Promoter (<=1kb)	17
GTF2I	1.83	0.000555	0.0269	ENSG00000263001.5	ENST00000613513.1	0	CPG_ov	74657575	74658575	6.69	Promoter (<=1kb)	7
PP7080	1.83	0.000572	0.0272	ENSG00000188242.4	ENST00000510714.1	0	CPG_ov	472526	473526	5.46	Promoter (<=1kb)	5
RAI1	1.83	0.000774	0.0305	ENSG00000108557.17	ENST00000471135.2	0	CPG_ov	17681953	17682953	6.01	Promoter (<=1kb)	17
SAMD4A	1.83	0.00098	0.0338	ENSG00000020577.13	ENST00000554335.5	-250	CPG_ov	54565847	54566847	7.12	Promoter (<=1kb)	14
ASL	1.83	0.00159	0.0404	ENSG00000126522.16	ENST00000464970.1	10496	no_CPG	66099735	66100735	7.26	Intron (ENST00000450043.2/ENSG00000249319.2, intron 7 of 11)	7
ETV4	1.82	3.4e-05	0.00662	ENSG00000175832.12	ENST00000538265.5	0	CPG_ov	43545832	43546832	6.99	Promoter (<=1kb)	17
FOXN3	1.82	7.23e-05	0.0102	ENSG00000053254.15	ENST00000557258.5	161	CPG_ov	89415951	89416951	5.75	Promoter (<=1kb)	14
MSRB1	1.82	9.14e-05	0.0115	ENSG00000198736.11	ENST00000361871.7	0	CPG_ov	1942945	1943945	6.46	Promoter (<=1kb)	16
CSRNP1	1.82	0.000141	0.0143	ENSG00000144655.14	ENST00000273153.9	0	CPG_ov	39153232	39154232	6.22	Promoter (<=1kb)	3
ZSWIM6	1.82	0.000214	0.0179	ENSG00000130449.5	ENST00000252744.5	0	CPG_ov	61331575	61332575	7.63	Promoter (<=1kb)	5
ASPSCR1	1.82	0.000468	0.0253	ENSG00000169696.15	ENST00000306729.11	0	CPG_ov	81977467	81978467	5.86	Promoter (<=1kb)	17
KPNA4	1.82	0.00064	0.0285	ENSG00000186432.8	ENST00000334256.8	0	CPG_ov	160565048	160566048	7.41	Promoter (<=1kb)	3
BRD9P2	1.82	0.000892	0.0324	ENSG00000249908.2	ENST00000506203.2	-15393	CPG_ov	784323	785323	5.09	Distal Intergenic	5
RGS10	1.82	0.000958	0.0334	ENSG00000148908.14	ENST00000369103.2	0	CPG_ov	119542382	119543382	5.57	Promoter (<=1kb)	10
HNRNPU	1.82	0.00112	0.0356	ENSG00000153187.17	ENST00000283179.13	145	CPG_ov	244863326	244864326	5.46	Promoter (<=1kb)	1
UBE2G1	1.82	0.00127	0.0373	ENSG00000132388.12	ENST00000396981.6	0	CPG_ov	4365704	4366704	6.74	Promoter (<=1kb)	17
BCL2	1.82	0.00189	0.0436	ENSG00000171791.12	ENST00000398117.1	0	CPG_ov	63319754	63320754	4.97	Promoter (<=1kb)	18
RELB	1.81	1.29e-06	0.000669	ENSG00000104856.13	ENST00000505236.1	68	CPG_ov	45001529	45002529	6.64	Promoter (<=1kb)	19
RP11-324I22.4	1.81	0.000162	0.0155	ENSG00000271335.5	ENST00000605499.1	0	CPG_ov	35335823	35336823	5.45	Promoter (<=1kb)	10
CNIH3	1.81	0.000163	0.0155	ENSG00000143786.7	ENST00000471578.5	0	no_CPG	224434429	224435429	6.11	Promoter (<=1kb)	1
XPO7	1.81	0.000397	0.0238	ENSG00000130227.16	ENST00000252512.13	0	CPG_ov	21919109	21920109	5.43	Promoter (<=1kb)	8
ZNF653	1.81	0.000498	0.0258	ENSG00000161914.9	ENST00000590548.5	0	CPG_ov	11504877	11505877	6.95	Promoter (<=1kb)	19
PAFAH1B1	1.81	0.000511	0.0259	ENSG00000007168.12	ENST00000397195.9	0	CPG_ov	2593338	2594338	6.64	Promoter (<=1kb)	17
FAM86B2	1.81	0.00111	0.0355	ENSG00000145002.12	ENST00000262365.8	0	CPG_ov	12436200	12437200	3.84	Promoter (<=1kb)	8
TFR2	1.81	0.00115	0.0359	ENSG00000106327.12	ENST00000461176.1	390	no_CPG	100626214	100627214	5.92	Promoter (<=1kb)	7
DNM1	1.8	3.15e-05	0.00627	ENSG00000106976.20	ENST00000635766.1	0	CPG_ov	128191142	128192142	4.99	Promoter (<=1kb)	9
CERCAM	1.8	0.00043	0.0248	ENSG00000167123.18	ENST00000372838.8	0	CPG_ov	128420284	128421284	6.37	Promoter (<=1kb)	9
CCDC40	1.8	0.000461	0.0253	ENSG00000141519.14	ENST00000374877.7	0	CPG_ov	80035699	80036699	7.07	Promoter (<=1kb)	17
PLPPR2	1.8	0.000749	0.03	ENSG00000105520.10	ENST00000251473.9	0	no_CPG	11354959	11355959	4.96	Promoter (<=1kb)	19
ZFR	1.8	0.000919	0.0327	ENSG00000056097.15	ENST00000265069.12	0	CPG_ov	32444129	32445129	6.69	Promoter (<=1kb)	5
RP11-543C4.1	1.8	0.0011	0.0355	ENSG00000247970.2	ENST00000502101.2	0	CPG_ov	99604250	99605250	6.78	Promoter (<=1kb)	14
HELZ	1.8	0.00133	0.0379	ENSG00000198265.11	ENST00000358691.9	0	CPG_ov	67245169	67246169	5.81	Promoter (<=1kb)	17
FOXP1	1.8	0.00151	0.0395	ENSG00000114861.18	ENST00000318789.8	0	CPG_ov	71583427	71584427	5.96	Promoter (<=1kb)	3
MIR1275	1.8	0.00192	0.0436	ENSG00000221697.1	ENST00000408770.1	-27142	CPG_ov	34027193	34028193	4.57	3' UTR	6
PRR7	1.8	0.00203	0.0448	ENSG00000131188.11	ENST00000323249.7	0	CPG_ov	177446563	177447563	5.86	Promoter (<=1kb)	5
FAM86MP	1.79	7.2e-06	0.00229	ENSG00000186234.7	ENST00000340703.5	-256	CPG_ov	9691239	9692239	6.45	Promoter (<=1kb)	4
FAM86C2P	1.79	0.000104	0.0121	ENSG00000160172.10	ENST00000525180.1	-67	CPG_ov	67805403	67806403	6.48	Promoter (<=1kb)	11
PYCR1	1.79	0.000175	0.0159	ENSG00000183010.16	ENST00000337943.9	0	CPG_ov	81937031	81938031	6.14	Promoter (<=1kb)	17
DENND1A	1.79	0.000242	0.019	ENSG00000119522.16	ENST00000373624.6	0	no_CPG	123929540	123930540	4.57	Promoter (<=1kb)	9
RP11-1055B8.9	1.79	0.000475	0.0254	ENSG00000275966.1	ENST00000617652.1	0	CPG_ov	81345690	81346690	6.78	Promoter (<=1kb)	17
KLHL15	1.79	0.000687	0.0292	ENSG00000174010.9	ENST00000328046.8	1210	CPG_ov	24024976	24025976	5.51	Promoter (1-2kb)	23
XPO4	1.79	0.000692	0.0292	ENSG00000132953.16	ENST00000255305.10	0	CPG_ov	20902223	20903223	4.46	Promoter (<=1kb)	13
TNRC6A	1.79	0.00123	0.037	ENSG00000090905.18	ENST00000315183.11	0	CPG_ov	24729009	24730009	6.1	Promoter (<=1kb)	16
BAMBI	1.79	0.00129	0.0374	ENSG00000095739.10	ENST00000375533.5	0	CPG_ov	28676995	28677995	5.85	Promoter (<=1kb)	10
RRAGD	1.79	0.00132	0.0379	ENSG00000025039.14	ENST00000369415.8	0	CPG_ov	89411523	89412523	5.73	Promoter (<=1kb)	6
SSFA2	1.79	0.00143	0.0386	ENSG00000138434.16	ENST00000480753.1	0	CPG_ov	181891551	181892551	7.03	Promoter (<=1kb)	2
RHOC	1.78	0.000116	0.0129	ENSG00000155366.16	ENST00000369633.6	0	CPG_ov	112706162	112707162	5.78	Promoter (<=1kb)	1
AJ003147.8	1.78	0.000136	0.014	ENSG00000262521.1	ENST00000576762.1	397	CPG_ov	3182621	3183621	6.47	Promoter (<=1kb)	16
ZBTB14	1.78	0.000209	0.0177	ENSG00000198081.10	ENST00000357006.8	0	CPG_ov	5295652	5296652	7.14	Promoter (<=1kb)	18
RP11-2B6.3	1.78	0.000242	0.019	ENSG00000269946.1	ENST00000602703.1	0	CPG_ov	94165638	94166638	7.07	Promoter (<=1kb)	9
RABEP2	1.78	0.000285	0.0208	ENSG00000177548.12	ENST00000357573.10	0	CPG_ov	28924869	28925869	6.78	Promoter (<=1kb)	16
GDPD5	1.78	0.000566	0.0271	ENSG00000158555.14	ENST00000336898.7	0	CPG_ov	75525372	75526372	4.8	Promoter (<=1kb)	11
GSKIP	1.78	0.000669	0.029	ENSG00000100744.14	ENST00000438650.5	0	CPG_ov	96362725	96363725	5.87	Promoter (<=1kb)	14
MIR6821	1.78	0.000912	0.0326	ENSG00000276753.1	ENST00000617625.1	0	CPG_ov	49961866	49962866	6.86	Promoter (<=1kb)	22
TRABD	1.78	0.000978	0.0337	ENSG00000170638.9	ENST00000380909.8	0	CPG_ov	50185205	50186205	4.83	Promoter (<=1kb)	22
CPSF3L	1.78	0.00125	0.0371	ENSG00000127054.19	ENST00000540437.5	0	CPG_ov	1324309	1325309	4.99	Promoter (<=1kb)	1
ELOVL4	1.78	0.00136	0.0381	ENSG00000118402.5	ENST00000369816.4	0	CPG_ov	79947092	79948092	6.64	Promoter (<=1kb)	6
MAML3	1.78	0.0015	0.0395	ENSG00000196782.12	ENST00000502696.1	519	CPG_ov	140151450	140152450	7.75	Promoter (<=1kb)	4
RP11-379B18.5	1.77	1.51e-05	0.00385	ENSG00000241288.7	ENST00000625484.1	0	CPG_ov	125915532	125916532	7.47	Promoter (<=1kb)	3
FAM86KP	1.77	5.13e-05	0.00844	ENSG00000163612.10	ENST00000509817.1	0	CPG_ov	9152335	9153335	6.88	Promoter (<=1kb)	4
CTCF	1.77	6.84e-05	0.00996	ENSG00000102974.14	ENST00000264010.8	0	CPG_ov	67561611	67562611	7.04	Promoter (<=1kb)	16
RALB	1.77	0.000164	0.0155	ENSG00000144118.13	ENST00000272519.9	0	CPG_ov	120252238	120253238	7.18	Promoter (<=1kb)	2
PERM1	1.77	0.000171	0.0158	ENSG00000187642.9	ENST00000479361.1	0	CPG_ov	975911	976911	4.9	Promoter (<=1kb)	1
PAPD5	1.77	0.00018	0.0162	ENSG00000121274.12	ENST00000436909.7	0	CPG_ov	50152313	50153313	6.16	Promoter (<=1kb)	16
CBX4	1.77	0.000264	0.0197	ENSG00000141582.14	ENST00000269397.8	0	CPG_ov	79839256	79840256	6.57	Promoter (<=1kb)	17
MSL1	1.77	0.000536	0.0266	ENSG00000188895.11	ENST00000398532.8	-111	CPG_ov	40121187	40122187	6.69	Promoter (<=1kb)	17
LINC01521	1.77	0.000597	0.0276	ENSG00000213888.3	ENST00000504184.3	0	CPG_ov	31346266	31347266	6.8	Promoter (<=1kb)	22
ATP1A1	1.77	0.000625	0.0281	ENSG00000163399.15	ENST00000537345.5	0	CPG_ov	116373572	116374572	6.83	Promoter (<=1kb)	1
CCDC102A	1.77	0.000662	0.029	ENSG00000135736.5	ENST00000258214.2	76	CPG_ov	57535523	57536523	6.86	Promoter (<=1kb)	16
CARHSP1	1.77	0.00105	0.0349	ENSG00000153048.10	ENST00000396593.6	0	CPG_ov	8868387	8869387	7.54	Promoter (<=1kb)	16
SYDE2	1.77	0.00211	0.0455	ENSG00000097096.8	ENST00000341460.5	0	CPG_ov	85200606	85201606	7.08	Promoter (<=1kb)	1
GAS2L1	1.76	0.000199	0.0173	ENSG00000185340.15	ENST00000616432.4	0	CPG_ov	29306312	29307312	7.74	Promoter (<=1kb)	22
ZFP91	1.76	0.000248	0.0192	ENSG00000186660.14	ENST00000316059.6	0	CPG_ov	58578589	58579589	7.66	Promoter (<=1kb)	11
USP34	1.76	0.000273	0.0202	ENSG00000115464.14	ENST00000398571.6	0	CPG_ov	61470710	61471710	7.45	Promoter (<=1kb)	2
WHSC1	1.76	0.000338	0.0222	ENSG00000109685.17	ENST00000508803.5	-197	CPG_ov	1870227	1871227	5.85	Promoter (<=1kb)	4
ANXA2	1.76	0.000434	0.0249	ENSG00000182718.16	ENST00000396024.7	0	CPG_ov	60397586	60398586	7.64	Promoter (<=1kb)	15
RCOR1	1.76	0.000436	0.0249	ENSG00000089902.9	ENST00000262241.6	0	CPG_ov	102591931	102592931	6.58	Promoter (<=1kb)	14
TRIM52-AS1	1.76	0.000438	0.025	ENSG00000248275.1	ENST00000509252.1	137	CPG_ov	181261361	181262361	6.86	Promoter (<=1kb)	5
CRK	1.76	0.000468	0.0253	ENSG00000167193.7	ENST00000398970.5	0	CPG_ov	1455918	1456918	6.19	Promoter (<=1kb)	17
CDK6	1.76	0.000611	0.0279	ENSG00000105810.9	ENST00000265734.8	0	CPG_ov	92833618	92834618	7.58	Promoter (<=1kb)	7
FASN	1.76	0.00112	0.0356	ENSG00000169710.8	ENST00000306749.3	0	CPG_ov	82097567	82098567	5.53	Promoter (<=1kb)	17
LDB1	1.76	0.00155	0.0399	ENSG00000198728.10	ENST00000361198.9	0	no_CPG	102114506	102115506	5.66	Promoter (<=1kb)	10
NRBP2	1.76	0.00178	0.0424	ENSG00000185189.16	ENST00000533093.5	0	CPG_ov	143840634	143841634	5.37	Promoter (<=1kb)	8
LCN12	1.76	0.0018	0.0427	ENSG00000184925.11	ENST00000484304.1	0	CPG_ov	136949474	136950474	6.11	Promoter (<=1kb)	9
HDAC1	1.75	0.000228	0.0183	ENSG00000116478.11	ENST00000373548.7	0	CPG_ov	32291603	32292603	7.12	Promoter (<=1kb)	1
KLF10	1.75	0.000264	0.0197	ENSG00000155090.14	ENST00000395884.3	0	CPG_ov	102653536	102654536	7.5	Promoter (<=1kb)	8
NUCKS1	1.75	0.000462	0.0253	ENSG00000069275.12	ENST00000367142.4	98	CPG_ov	205749178	205750178	7.22	Promoter (<=1kb)	1
AC008268.1	1.75	0.000462	0.0253	ENSG00000235584.2	ENST00000425887.2	16128	CPG_ov	95682212	95683212	5.84	Distal Intergenic	2
MECP2	1.75	0.000675	0.029	ENSG00000169057.20	ENST00000303391.10	0	CPG_ov	154096955	154097955	6.63	Promoter (<=1kb)	23
ZFHX2	1.75	0.000703	0.0293	ENSG00000136367.13	ENST00000419474.4	0	CPG_ov	23551157	23552157	5.65	Promoter (<=1kb)	14
PTBP2	1.75	0.000713	0.0295	ENSG00000117569.18	ENST00000482253.5	0	CPG_ov	96721425	96722425	6.73	Promoter (<=1kb)	1
KMT2B	1.75	0.000816	0.0313	ENSG00000272333.5	ENST00000420124.2	0	CPG_ov	35717185	35718185	6.84	Promoter (<=1kb)	19
TM9SF3	1.75	0.00084	0.0316	ENSG00000077147.14	ENST00000371142.8	0	CPG_ov	96586297	96587297	5.62	Promoter (<=1kb)	10
CASZ1	1.75	0.000863	0.032	ENSG00000130940.14	ENST00000496432.6	0	CPG_ov	10693592	10694592	4.28	Promoter (<=1kb)	1
GNAS	1.75	0.000879	0.0322	ENSG00000087460.23	ENST00000371081.5	0	CPG_ov	58891527	58892527	5.79	Promoter (<=1kb)	20
RWDD3	1.75	0.00108	0.0353	ENSG00000122481.16	ENST00000370202.4	0	CPG_ov	95233818	95234818	7.01	Promoter (<=1kb)	1
RP11-123K19.2	1.75	0.00127	0.0372	ENSG00000238010.1	ENST00000457964.1	81567	CPG_ov	126722323	126723323	5.87	Distal Intergenic	9
SPG7	1.75	0.00128	0.0374	ENSG00000197912.13	ENST00000620811.4	0	CPG_ov	89507998	89508998	6.52	Promoter (<=1kb)	16
MICALL2	1.74	9.68e-05	0.0118	ENSG00000164877.18	ENST00000472100.5	0	CPG_ov	1459092	1460092	7.74	Promoter (<=1kb)	7
MGAT1	1.74	0.000171	0.0158	ENSG00000131446.16	ENST00000446023.6	0	CPG_ov	180809605	180810605	7.08	Promoter (<=1kb)	5
SPIDR	1.74	0.000295	0.0209	ENSG00000164808.16	ENST00000297423.8	0	CPG_ov	47260494	47261494	5.83	Promoter (<=1kb)	8
MIER3	1.74	0.000542	0.0267	ENSG00000155545.19	ENST00000381226.7	0	CPG_ov	56951493	56952493	5.01	Promoter (<=1kb)	5
VPS51	1.74	0.000588	0.0274	ENSG00000149823.7	ENST00000530773.5	0	CPG_ov	65096012	65097012	6.47	Promoter (<=1kb)	11
PHF21A	1.74	0.000707	0.0294	ENSG00000135365.15	ENST00000323180.10	0	CPG_ov	46120696	46121696	6.78	Promoter (<=1kb)	11
VGLL4	1.74	0.000721	0.0296	ENSG00000144560.13	ENST00000418000.5	0	CPG_ov	11719129	11720129	5.67	Promoter (<=1kb)	3
CEBPB	1.74	0.00109	0.0353	ENSG00000172216.5	ENST00000303004.4	0	CPG_ov	50190474	50191474	6.64	Promoter (<=1kb)	20
TGFB3	1.74	0.00174	0.042	ENSG00000119699.7	ENST00000555193.1	0	CPG_ov	75981879	75982879	6.17	Promoter (<=1kb)	14
ARRDC1	1.74	0.00199	0.0445	ENSG00000197070.13	ENST00000371421.8	0	CPG_ov	137604706	137605706	4.28	Promoter (<=1kb)	9
EXOC3	1.74	0.00201	0.0448	ENSG00000180104.15	ENST00000512944.5	0	CPG_ov	442786	443786	5.21	Promoter (<=1kb)	5
CELF5	1.74	0.00228	0.0468	ENSG00000161082.12	ENST00000588350.1	1801	CPG_ov	3275706	3276706	6.1	Promoter (1-2kb)	19
UBE2V1	1.73	7.07e-05	0.0101	ENSG00000244687.11	ENST00000371657.9	0	CPG_ov	50112573	50113573	6.45	Promoter (<=1kb)	20
FAM86DP	1.73	9.17e-05	0.0115	ENSG00000244026.6	ENST00000497543.5	0	CPG_ov	75435010	75436010	7.69	Promoter (<=1kb)	3
FAM214B	1.73	0.000108	0.0124	ENSG00000005238.19	ENST00000603301.5	0	CPG_ov	35111133	35112133	7.24	Promoter (<=1kb)	9
EP300	1.73	0.000368	0.023	ENSG00000100393.11	ENST00000263253.8	0	CPG_ov	41091161	41092161	7.98	Promoter (<=1kb)	22
FAM20B	1.73	0.000393	0.0237	ENSG00000116199.11	ENST00000440702.5	0	CPG_ov	179025268	179026268	6	Promoter (<=1kb)	1
FAM13B	1.73	0.0005	0.0258	ENSG00000031003.10	ENST00000033079.7	0	CPG_ov	138032545	138033545	6.52	Promoter (<=1kb)	5
ACTN1	1.73	0.000504	0.0258	ENSG00000072110.13	ENST00000193403.10	0	CPG_ov	68978875	68979875	8.21	Promoter (<=1kb)	14
ZNF784	1.73	0.000505	0.0258	ENSG00000179922.5	ENST00000325351.4	0	CPG_ov	55623775	55624775	6.19	Promoter (<=1kb)	19
SMPD2	1.73	0.000531	0.0265	ENSG00000135587.8	ENST00000258052.7	0	CPG_ov	109440188	109441188	5.68	Promoter (<=1kb)	6
NEIL2	1.73	0.000556	0.0269	ENSG00000154328.15	ENST00000436750.7	0	CPG_ov	11769122	11770122	6.01	Promoter (<=1kb)	8
PRR5	1.73	0.000581	0.0273	ENSG00000186654.20	ENST00000336985.10	0	CPG_ov	44701627	44702627	4.6	Promoter (<=1kb)	22
C11orf95	1.73	0.000666	0.029	ENSG00000188070.9	ENST00000433688.2	0	CPG_ov	63768427	63769427	5.6	Promoter (<=1kb)	11
SLC41A3	1.73	0.000675	0.029	ENSG00000114544.16	ENST00000360370.8	0	CPG_ov	126083759	126084759	7.18	Promoter (<=1kb)	3
ERF	1.73	0.000683	0.0292	ENSG00000105722.9	ENST00000222329.8	0	CPG_ov	42254252	42255252	6.85	Promoter (<=1kb)	19
WNK2	1.73	0.000742	0.0299	ENSG00000165238.16	ENST00000448039.5	-87	CPG_ov	93183829	93184829	4.65	Promoter (<=1kb)	9
FAM129B	1.73	0.000762	0.0303	ENSG00000136830.11	ENST00000478917.1	0	CPG_ov	127568622	127569622	4.94	Promoter (<=1kb)	9
MXRA8	1.73	0.000851	0.0317	ENSG00000162576.16	ENST00000342753.8	0	no_CPG	1358149	1359149	5.44	Promoter (<=1kb)	1
MSH6	1.73	0.000872	0.0321	ENSG00000116062.14	ENST00000540021.5	0	CPG_ov	47782840	47783840	7.82	Promoter (<=1kb)	2
AC108142.1	1.73	0.000974	0.0337	ENSG00000177822.7	ENST00000509012.5	0	CPG_ov	182143884	182144884	6.24	Promoter (<=1kb)	4
PTPRS	1.73	0.00101	0.0344	ENSG00000105426.15	ENST00000591760.5	0	CPG_ov	5293066	5294066	6.03	Promoter (<=1kb)	19
DEGS1	1.73	0.00187	0.0431	ENSG00000143753.12	ENST00000323699.8	0	CPG_ov	224182833	224183833	6.05	Promoter (<=1kb)	1
C21orf91	1.72	5.03e-05	0.00832	ENSG00000154642.10	ENST00000284881.8	0	CPG_ov	17819194	17820194	6.15	Promoter (<=1kb)	21
SPIN1	1.72	0.000226	0.0182	ENSG00000106723.16	ENST00000483785.1	0	CPG_ov	88388503	88389503	5.07	Promoter (<=1kb)	9
SLC41A1	1.72	0.000428	0.0248	ENSG00000133065.10	ENST00000367137.3	0	CPG_ov	205812643	205813643	7.13	Promoter (<=1kb)	1
SNX8	1.72	0.000445	0.0251	ENSG00000106266.9	ENST00000222990.7	0	CPG_ov	2313713	2314713	5.71	Promoter (<=1kb)	7
MRPS26	1.72	0.000468	0.0253	ENSG00000125901.5	ENST00000380325.3	0	CPG_ov	3045459	3046459	5.49	Promoter (<=1kb)	20
NHS	1.72	0.000569	0.0271	ENSG00000188158.14	ENST00000380060.7	1466	CPG_ov	17376886	17377886	4.45	Promoter (1-2kb)	23
NFATC1	1.72	0.000592	0.0275	ENSG00000131196.17	ENST00000253506.9	-247	CPG_ov	79394609	79395609	6.9	Promoter (<=1kb)	18
PRKAG1	1.72	0.000677	0.029	ENSG00000181929.11	ENST00000548065.5	-614	no_CPG	49019811	49020811	5.2	Promoter (<=1kb)	12
ZNF217	1.72	0.000814	0.0313	ENSG00000171940.13	ENST00000371471.6	0	CPG_ov	53593691	53594691	7.38	Promoter (<=1kb)	20
NIPBL	1.72	0.000915	0.0326	ENSG00000164190.16	ENST00000282516.12	0	CPG_ov	36876405	36877405	7.88	Promoter (<=1kb)	5
PSME1	1.72	0.000967	0.0336	ENSG00000092010.14	ENST00000206451.10	0	CPG_ov	24135583	24136583	6.26	Promoter (<=1kb)	14
APBB1	1.72	0.00141	0.0386	ENSG00000166313.18	ENST00000389906.6	0	CPG_ov	6418776	6419776	5.68	Promoter (<=1kb)	11
SUZ12	1.72	0.00148	0.0393	ENSG00000178691.10	ENST00000322652.9	0	CPG_ov	31936618	31937618	6.21	Promoter (<=1kb)	17
LRRC37B	1.72	0.0015	0.0395	ENSG00000185158.12	ENST00000583342.1	0	CPG_ov	32006989	32007989	6.09	Promoter (<=1kb)	17
UBE2A	1.72	0.00154	0.0399	ENSG00000077721.15	ENST00000371558.6	0	CPG_ov	119573919	119574919	5.73	Promoter (<=1kb)	23
SEPT5	1.72	0.00155	0.0399	ENSG00000184702.17	ENST00000490204.1	0	CPG_ov	19717697	19718697	5.58	Promoter (<=1kb)	22
MMS19	1.71	0.000144	0.0144	ENSG00000155229.20	ENST00000415383.5	0	CPG_ov	97498064	97499064	7.42	Promoter (<=1kb)	10
LINC00094	1.71	0.000276	0.0203	ENSG00000235106.9	ENST00000603928.2	0	CPG_ov	134025066	134026066	5.69	Promoter (<=1kb)	9
PHC2	1.71	0.000295	0.0209	ENSG00000134686.17	ENST00000484692.1	0	CPG_ov	33430717	33431717	6.02	Promoter (<=1kb)	1
ARHGEF19	1.71	0.000375	0.0232	ENSG00000142632.16	ENST00000478117.5	0	CPG_ov	16206350	16207350	7.11	Promoter (<=1kb)	1
FAM35A	1.71	0.000466	0.0253	ENSG00000122376.11	ENST00000298784.5	0	CPG_ov	87094693	87095693	6.79	Promoter (<=1kb)	10
AGRN	1.71	0.000469	0.0253	ENSG00000188157.13	ENST00000620552.4	352	CPG_ov	1020475	1021475	6.08	Promoter (<=1kb)	1
SLC16A6	1.71	0.000524	0.0263	ENSG00000108932.11	ENST00000327268.8	0	CPG_ov	68291084	68292084	6.22	Promoter (<=1kb)	17
XXbac-B444P24.10	1.71	0.000553	0.0269	ENSG00000161132.6	ENST00000438948.1	0	CPG_ov	20299048	20300048	6.9	Promoter (<=1kb)	22
MKNK2	1.71	0.000699	0.0292	ENSG00000099875.14	ENST00000589509.5	-9794	CPG_ov	2061038	2062038	6.36	Distal Intergenic	19
SMAD2	1.71	0.000782	0.0306	ENSG00000175387.15	ENST00000262160.10	0	CPG_ov	47930538	47931538	7.22	Promoter (<=1kb)	18
TNK2	1.71	0.000788	0.0308	ENSG00000061938.16	ENST00000381916.6	0	CPG_ov	195895189	195896189	5.34	Promoter (<=1kb)	3
PIGQ	1.71	0.000962	0.0334	ENSG00000007541.16	ENST00000321878.9	0	CPG_ov	569204	570204	4.6	Promoter (<=1kb)	16
PLCD3	1.71	0.000994	0.034	ENSG00000161714.11	ENST00000619929.4	0	CPG_ov	45131970	45132970	6.28	Promoter (<=1kb)	17
DPYSL4	1.71	0.00105	0.0349	ENSG00000151640.12	ENST00000471544.1	19576	no_CPG	132223129	132224129	3.71	Intron (ENST00000462160.5/ENSG00000165752.16, intron 8 of 12)	10
NEO1	1.71	0.00116	0.0361	ENSG00000067141.16	ENST00000261908.10	0	CPG_ov	73051931	73052931	6.17	Promoter (<=1kb)	15
CDIP1	1.71	0.00118	0.0364	ENSG00000089486.16	ENST00000563332.6	0	CPG_ov	4538044	4539044	7.13	Promoter (<=1kb)	16
B3GNT2	1.71	0.00125	0.0371	ENSG00000170340.10	ENST00000301998.4	0	CPG_ov	62195948	62196948	6.48	Promoter (<=1kb)	2
TSPAN9	1.71	0.00156	0.0399	ENSG00000011105.11	ENST00000537971.5	0	CPG_ov	3076678	3077678	6.52	Promoter (<=1kb)	12
MPG	1.71	0.00161	0.0406	ENSG00000103152.11	ENST00000356432.7	0	CPG_ov	77260	78260	5.72	Promoter (<=1kb)	16
PPP3R1	1.71	0.00183	0.0429	ENSG00000221823.10	ENST00000234310.7	0	CPG_ov	68251852	68252852	6.15	Promoter (<=1kb)	2
FAM69A	1.71	0.00194	0.044	ENSG00000154511.11	ENST00000615519.4	0	CPG_ov	92961125	92962125	5.69	Promoter (<=1kb)	1
RP11-65J3.2	1.71	0.00218	0.0459	ENSG00000226355.1	ENST00000439014.1	-24116	CPG_ov	129413100	129414100	6.03	Distal Intergenic	9
EEF2KMT	1.7	3.14e-05	0.00627	ENSG00000118894.14	ENST00000458008.8	0	CPG_ov	5097584	5098584	7.32	Promoter (<=1kb)	16
C7orf50	1.7	5.64e-05	0.00889	ENSG00000146540.14	ENST00000412051.5	0	CPG_ov	1028257	1029257	6.54	Promoter (<=1kb)	7
DENND3	1.7	0.0002	0.0173	ENSG00000105339.10	ENST00000518347.5	0	CPG_ov	141127834	141128834	6.51	Promoter (<=1kb)	8
SRM	1.7	0.000206	0.0176	ENSG00000116649.9	ENST00000376957.6	0	CPG_ov	11059767	11060767	5.6	Promoter (<=1kb)	1
NQO2	1.7	0.000227	0.0183	ENSG00000124588.19	ENST00000397717.6	0	CPG_ov	2999166	3000166	5.96	Promoter (<=1kb)	6
KIF13A	1.7	0.000249	0.0192	ENSG00000137177.19	ENST00000378814.9	0	CPG_ov	17987433	17988433	5.54	Promoter (<=1kb)	6
ST3GAL2	1.7	0.000258	0.0195	ENSG00000157350.12	ENST00000342907.2	0	CPG_ov	70438685	70439685	6.64	Promoter (<=1kb)	16
PLEKHG5	1.7	0.000358	0.0227	ENSG00000171680.20	ENST00000340850.9	0	CPG_ov	6489793	6490793	6.33	Promoter (<=1kb)	1
ANKRD13B	1.7	0.000416	0.0245	ENSG00000198720.12	ENST00000583728.5	0	no_CPG	29589750	29590750	6.38	Promoter (<=1kb)	17
KDM2A	1.7	0.000505	0.0258	ENSG00000173120.14	ENST00000398645.6	0	CPG_ov	67118720	67119720	6.41	Promoter (<=1kb)	11
THRA	1.7	0.000531	0.0265	ENSG00000126351.12	ENST00000577637.1	7015	no_CPG	40091449	40092449	5.86	3' UTR	17
VEZF1	1.7	0.000576	0.0273	ENSG00000136451.8	ENST00000581208.1	0	CPG_ov	57987588	57988588	7.01	Promoter (<=1kb)	17
RCBTB2	1.7	0.000767	0.0305	ENSG00000136161.12	ENST00000344532.7	0	CPG_ov	48532469	48533469	6.86	Promoter (<=1kb)	13
YAF2	1.7	0.000792	0.0308	ENSG00000015153.14	ENST00000327791.8	0	CPG_ov	42237481	42238481	6.51	Promoter (<=1kb)	12
H3F3A	1.7	0.000875	0.0322	ENSG00000163041.9	ENST00000366815.7	0	CPG_ov	226062380	226063380	7.1	Promoter (<=1kb)	1
PDP1	1.7	0.00102	0.0347	ENSG00000164951.15	ENST00000297598.4	0	CPG_ov	93916475	93917475	7.15	Promoter (<=1kb)	8
EEA1	1.7	0.00133	0.0379	ENSG00000102189.16	ENST00000322349.12	0	CPG_ov	92929097	92930097	6.64	Promoter (<=1kb)	12
ZCCHC11	1.7	0.00151	0.0395	ENSG00000134744.13	ENST00000257177.8	0	CPG_ov	52552801	52553801	7.13	Promoter (<=1kb)	1
SLC19A1	1.7	0.00156	0.04	ENSG00000173638.18	ENST00000311124.8	0	CPG_ov	45541654	45542654	4.05	Promoter (<=1kb)	21
RNF130	1.7	0.00239	0.0478	ENSG00000113269.13	ENST00000522208.6	0	CPG_ov	180071517	180072517	6.18	Promoter (<=1kb)	5
DGCR2	1.69	0.000105	0.0122	ENSG00000070413.19	ENST00000537045.5	0	CPG_ov	19122052	19123052	5.45	Promoter (<=1kb)	22
SPRY2	1.69	0.000107	0.0123	ENSG00000136158.11	ENST00000377104.3	0	CPG_ov	80340730	80341730	5.81	Promoter (<=1kb)	13
ALAD	1.69	0.000125	0.0135	ENSG00000148218.15	ENST00000409155.7	0	CPG_ov	113400872	113401872	6.96	Promoter (<=1kb)	9
MMAA	1.69	0.000157	0.0152	ENSG00000151611.13	ENST00000506919.1	0	CPG_ov	145618958	145619958	6.54	Promoter (<=1kb)	4
ING5	1.69	0.000221	0.0181	ENSG00000168395.15	ENST00000492488.5	-54	CPG_ov	241700981	241701981	6.77	Promoter (<=1kb)	2
TMEM185B	1.69	0.000361	0.0227	ENSG00000226479.3	ENST00000426077.2	0	CPG_ov	120223037	120224037	6.72	Promoter (<=1kb)	2
PDS5A	1.69	0.000476	0.0254	ENSG00000121892.14	ENST00000506262.1	0	CPG_ov	39976616	39977616	6.67	Promoter (<=1kb)	4
EDEM1	1.69	0.000627	0.0281	ENSG00000134109.10	ENST00000434243.5	0	CPG_ov	5187170	5188170	7.47	Promoter (<=1kb)	3
DBP	1.69	0.000677	0.029	ENSG00000105516.10	ENST00000594723.1	112	CPG_ov	48636201	48637201	6.11	Promoter (<=1kb)	19
NOSIP	1.69	0.000777	0.0306	ENSG00000142546.13	ENST00000599537.5	-117	CPG_ov	49590379	49591379	7.19	Promoter (<=1kb)	19
VEGFB	1.69	0.000819	0.0314	ENSG00000173511.9	ENST00000309422.6	0	CPG_ov	64233867	64234867	5.98	Promoter (<=1kb)	11
ING2	1.69	0.00105	0.0349	ENSG00000168556.6	ENST00000302327.3	0	CPG_ov	183504110	183505110	7.71	Promoter (<=1kb)	4
ENOSF1	1.69	0.00119	0.0365	ENSG00000132199.18	ENST00000383578.7	0	CPG_ov	712126	713126	4.68	Promoter (<=1kb)	18
ENOX1	1.69	0.0012	0.0366	ENSG00000120658.13	ENST00000261488.10	117	CPG_ov	43785791	43786791	5.57	Promoter (<=1kb)	13
CDK9	1.69	0.00122	0.0369	ENSG00000136807.12	ENST00000421939.5	0	CPG_ov	127784796	127785796	5.91	Promoter (<=1kb)	9
ATP11C	1.69	0.0013	0.0376	ENSG00000101974.14	ENST00000370557.5	0	CPG_ov	139932603	139933603	6.22	Promoter (<=1kb)	23
ARFRP1	1.69	0.00142	0.0386	ENSG00000101246.19	ENST00000609188.1	678	no_CPG	63698623	63699623	5.01	Promoter (<=1kb)	20
ZNF7	1.69	0.00162	0.0407	ENSG00000147789.15	ENST00000532777.5	0	CPG_ov	144826581	144827581	7.06	Promoter (<=1kb)	8
ROM1	1.69	0.00174	0.042	ENSG00000149489.8	ENST00000278833.3	0	CPG_ov	62612445	62613445	6.87	Promoter (<=1kb)	11
RHOBTB2	1.69	0.00183	0.0429	ENSG00000008853.16	ENST00000251822.6	0	CPG_ov	22998763	22999763	5.9	Promoter (<=1kb)	8
YAP1	1.69	0.00236	0.0476	ENSG00000137693.13	ENST00000629586.2	0	CPG_ov	102110492	102111492	6.3	Promoter (<=1kb)	11
BICD2	1.68	0.000162	0.0155	ENSG00000185963.13	ENST00000356884.10	0	CPG_ov	92764642	92765642	7.18	Promoter (<=1kb)	9
MSANTD3	1.68	0.000253	0.0193	ENSG00000066697.14	ENST00000374886.7	119	CPG_ov	100427556	100428556	6.4	Promoter (<=1kb)	9
CCND1	1.68	0.000317	0.0215	ENSG00000110092.3	ENST00000535993.1	683	CPG_ov	69641914	69642914	5.14	Promoter (<=1kb)	11
WDYHV1	1.68	0.000321	0.0216	ENSG00000156795.6	ENST00000287387.6	0	CPG_ov	123416486	123417486	7.82	Promoter (<=1kb)	8
ZNF787	1.68	0.00035	0.0224	ENSG00000142409.5	ENST00000610935.1	0	CPG_ov	56120993	56121993	7.5	Promoter (<=1kb)	19
CHERP	1.68	0.000423	0.0247	ENSG00000085872.14	ENST00000546361.6	0	CPG_ov	16542072	16543072	5.89	Promoter (<=1kb)	19
MINK1	1.68	0.000459	0.0253	ENSG00000141503.15	ENST00000355280.10	0	CPG_ov	4832783	4833783	5.79	Promoter (<=1kb)	17
MBD3	1.68	0.000487	0.0256	ENSG00000071655.17	ENST00000156825.5	0	CPG_ov	1592114	1593114	4.89	Promoter (<=1kb)	19
AC145124.2	1.68	0.000533	0.0265	ENSG00000255495.1	ENST00000528514.1	0	CPG_ov	12194151	12195151	4.53	Promoter (<=1kb)	8
TCF25	1.68	0.000665	0.029	ENSG00000141002.18	ENST00000263347.11	0	CPG_ov	89873461	89874461	7.12	Promoter (<=1kb)	16
RBCK1	1.68	0.000672	0.029	ENSG00000125826.19	ENST00000382214.7	0	CPG_ov	407654	408654	6.28	Promoter (<=1kb)	20
SP3	1.68	0.000766	0.0305	ENSG00000172845.13	ENST00000416195.1	0	CPG_ov	173964408	173965408	7.55	Promoter (<=1kb)	2
CUL4B	1.68	0.000772	0.0305	ENSG00000158290.16	ENST00000336592.10	0	CPG_ov	120560738	120561738	6.73	Promoter (<=1kb)	23
LCOR	1.68	0.00109	0.0353	ENSG00000196233.12	ENST00000540664.5	0	CPG_ov	96831913	96832913	6.62	Promoter (<=1kb)	10
GRSF1	1.68	0.00109	0.0354	ENSG00000132463.13	ENST00000254799.10	0	CPG_ov	70839208	70840208	6.81	Promoter (<=1kb)	4
RELL2	1.68	0.00151	0.0396	ENSG00000164620.8	ENST00000444782.5	0	CPG_ov	141636444	141637444	5.96	Promoter (<=1kb)	5
YRDC	1.68	0.00182	0.0429	ENSG00000196449.3	ENST00000373044.2	0	CPG_ov	37807881	37808881	6.3	Promoter (<=1kb)	1
FAM86FP	1.67	0.00015	0.0148	ENSG00000164845.16	ENST00000338711.9	0	CPG_ov	8242752	8243752	7.29	Promoter (<=1kb)	12
MALT1	1.67	0.000288	0.0208	ENSG00000172175.12	ENST00000348428.7	0	CPG_ov	58670930	58671930	6.07	Promoter (<=1kb)	18
USF2	1.67	0.000596	0.0276	ENSG00000105698.15	ENST00000343550.9	-580	CPG_ov	35267398	35268398	5.46	Promoter (<=1kb)	19
CCNF	1.67	0.000627	0.0281	ENSG00000162063.12	ENST00000293968.11	0	CPG_ov	2428770	2429770	6.62	Promoter (<=1kb)	16
SLC27A4	1.67	0.000687	0.0292	ENSG00000167114.12	ENST00000372870.5	0	CPG_ov	128340211	128341211	5.58	Promoter (<=1kb)	9
TMEM145	1.67	0.000813	0.0313	ENSG00000167619.11	ENST00000601020.1	2027	no_CPG	42316299	42317299	4.87	Promoter (2-3kb)	19
DOPEY2	1.67	0.00088	0.0322	ENSG00000142197.12	ENST00000270190.8	0	CPG_ov	36156161	36157161	5.55	Promoter (<=1kb)	21
TSSK3	1.67	0.000982	0.0338	ENSG00000162526.6	ENST00000421153.2	0	CPG_ov	32351084	32352084	6.32	Promoter (<=1kb)	1
RP11-61L23.2	1.67	0.00109	0.0353	ENSG00000253882.6	ENST00000491047.5	0	CPG_ov	143836255	143837255	4.96	Promoter (<=1kb)	7
RP11-35O15.1	1.67	0.00145	0.0389	ENSG00000259424.1	ENST00000560221.1	-185	CPG_ov	98647556	98648556	7.17	Promoter (<=1kb)	15
STK39	1.67	0.00148	0.0393	ENSG00000198648.10	ENST00000355999.4	273	CPG_ov	168246868	168247868	6.29	Promoter (<=1kb)	2
ZCWPW1	1.67	0.00183	0.0429	ENSG00000078487.17	ENST00000360951.8	1436	no_CPG	100426228	100427228	3.63	Promoter (1-2kb)	7
CTD-2026G6.3	1.67	0.00191	0.0436	ENSG00000272710.1	ENST00000608389.1	0	CPG_ov	75579615	75580615	4.06	Promoter (<=1kb)	3
FAAP20	1.67	0.00198	0.0444	ENSG00000162585.16	ENST00000400919.7	0	CPG_ov	2194450	2195450	6.34	Promoter (<=1kb)	1
LTBP4	1.66	9.42e-05	0.0117	ENSG00000090006.17	ENST00000594537.2	0	CPG_ov	40597948	40598948	7.19	Promoter (<=1kb)	19
ZNF768	1.66	0.000247	0.0192	ENSG00000169957.9	ENST00000562803.1	0	CPG_ov	30526674	30527674	7.6	Promoter (<=1kb)	16
ACOT7	1.66	0.000324	0.0217	ENSG00000097021.19	ENST00000608083.5	0	CPG_ov	6393149	6394149	6.64	Promoter (<=1kb)	1
FST	1.66	0.00035	0.0224	ENSG00000134363.11	ENST00000256759.7	-743	no_CPG	53478666	53479666	6.15	Promoter (<=1kb)	5
DLEU2	1.66	0.000353	0.0225	ENSG00000231607.9	ENST00000621282.4	664	CPG_ov	50123877	50124877	6.82	Promoter (<=1kb)	13
DDX31	1.66	0.000444	0.0251	ENSG00000125485.17	ENST00000372159.7	0	CPG_ov	132670075	132671075	5.76	Promoter (<=1kb)	9
COL4A3BP	1.66	0.000506	0.0258	ENSG00000113163.15	ENST00000380494.9	0	CPG_ov	75511250	75512250	7.22	Promoter (<=1kb)	5
FIZ1	1.66	0.000556	0.0269	ENSG00000179943.7	ENST00000221665.4	0	CPG_ov	55598894	55599894	8.11	Promoter (<=1kb)	19
SERTAD2	1.66	0.00103	0.0347	ENSG00000179833.4	ENST00000313349.3	0	CPG_ov	64653678	64654678	6.66	Promoter (<=1kb)	2
ADAM8	1.66	0.00117	0.0361	ENSG00000151651.15	ENST00000559018.1	1629	CPG_ov	133261236	133262236	5.35	Promoter (1-2kb)	10
RP5-942I16.1	1.66	0.00122	0.0369	ENSG00000234215.2	ENST00000436600.2	-73	CPG_ov	69597521	69598521	5.92	Promoter (<=1kb)	7
CKB	1.66	0.00124	0.037	ENSG00000166165.12	ENST00000554989.1	0	CPG_ov	103520597	103521597	5.99	Promoter (<=1kb)	14
CDH11	1.66	0.00125	0.0371	ENSG00000140937.13	ENST00000394156.7	0	CPG_ov	65121906	65122906	4.83	Promoter (<=1kb)	16
TRIB3	1.66	0.00125	0.0371	ENSG00000101255.10	ENST00000217233.7	0	CPG_ov	380330	381330	5.33	Promoter (<=1kb)	20
BRPF3	1.66	0.00147	0.0392	ENSG00000096070.19	ENST00000357641.10	0	CPG_ov	36196511	36197511	6.54	Promoter (<=1kb)	6
NCBP3	1.66	0.00154	0.0399	ENSG00000074356.16	ENST00000389005.5	0	CPG_ov	3845756	3846756	5.53	Promoter (<=1kb)	17
NEMP1	1.66	0.00251	0.0486	ENSG00000166881.9	ENST00000553654.1	0	CPG_ov	57087479	57088479	7.84	Promoter (<=1kb)	12
TUBB6	1.65	0.0002	0.0173	ENSG00000176014.12	ENST00000590693.5	0	CPG_ov	12307611	12308611	7.35	Promoter (<=1kb)	18
INPP5A	1.65	0.000212	0.0179	ENSG00000068383.18	ENST00000368594.7	0	CPG_ov	132536976	132537976	6.58	Promoter (<=1kb)	10
CCND2	1.65	0.000291	0.0209	ENSG00000118971.7	ENST00000261254.7	-567	CPG_ov	4272205	4273205	7.02	Promoter (<=1kb)	12
NFKBID	1.65	0.000378	0.0233	ENSG00000167604.13	ENST00000396901.5	0	CPG_ov	35899808	35900808	6.74	Promoter (<=1kb)	19
SUB1	1.65	0.000561	0.027	ENSG00000113387.11	ENST00000265073.8	0	CPG_ov	32585135	32586135	7.61	Promoter (<=1kb)	5
CDC42SE2	1.65	0.000704	0.0293	ENSG00000158985.13	ENST00000506419.5	0	CPG_ov	131263554	131264554	6.73	Promoter (<=1kb)	5
ZNF594	1.65	0.000709	0.0294	ENSG00000180626.9	ENST00000575779.1	0	CPG_ov	5191270	5192270	6.06	Promoter (<=1kb)	17
ATXN7L3	1.65	0.000779	0.0306	ENSG00000087152.15	ENST00000593073.5	0	CPG_ov	44199580	44200580	7.06	Promoter (<=1kb)	17
PXYLP1	1.65	0.000822	0.0314	ENSG00000155893.12	ENST00000636601.1	0	CPG_ov	141231072	141232072	5.52	Promoter (<=1kb)	3
FAM86C1	1.65	0.000839	0.0316	ENSG00000158483.15	ENST00000346333.10	0	CPG_ov	71786560	71787560	5.97	Promoter (<=1kb)	11
DCAF5	1.65	0.000857	0.0318	ENSG00000139990.17	ENST00000554215.5	373	CPG_ov	69151226	69152226	7.59	Promoter (<=1kb)	14
MECOM	1.65	0.000877	0.0322	ENSG00000085276.17	ENST00000486748.1	234	CPG_ov	169662156	169663156	6.75	Promoter (<=1kb)	3
ATXN7	1.65	0.000908	0.0326	ENSG00000163635.17	ENST00000487717.5	51	CPG_ov	63911980	63912980	6.98	Promoter (<=1kb)	3
ITGB5	1.65	0.00101	0.0343	ENSG00000082781.11	ENST00000296181.8	0	CPG_ov	124887009	124888009	6.78	Promoter (<=1kb)	3
ASH1L	1.65	0.00104	0.0349	ENSG00000116539.11	ENST00000368346.7	0	CPG_ov	155562406	155563406	7.08	Promoter (<=1kb)	1
CIRBP	1.65	0.00105	0.0349	ENSG00000099622.13	ENST00000588411.5	0	CPG_ov	1260383	1261383	5.35	Promoter (<=1kb)	19
FBXL20	1.65	0.0011	0.0355	ENSG00000108306.11	ENST00000577399.5	0	CPG_ov	39401801	39402801	6.61	Promoter (<=1kb)	17
CADM4	1.65	0.00182	0.0429	ENSG00000105767.2	ENST00000222374.2	0	CPG_ov	43639212	43640212	3.61	Promoter (<=1kb)	19
SCYL1	1.65	0.00184	0.0429	ENSG00000142186.16	ENST00000270176.9	0	CPG_ov	65524708	65525708	5.51	Promoter (<=1kb)	11
ARFRP1	1.65	0.00204	0.0448	ENSG00000101246.19	ENST00000612256.4	0	CPG_ov	63706969	63707969	3.96	Promoter (<=1kb)	20
NFIA	1.65	0.00209	0.0454	ENSG00000162599.15	ENST00000371189.8	0	no_CPG	61081796	61082796	5.84	Promoter (<=1kb)	1
ADAM11	1.64	0.000173	0.0158	ENSG00000073670.13	ENST00000588363.1	0	CPG_ov	44775338	44776338	6.25	Promoter (<=1kb)	17
GTDC1	1.64	0.000222	0.0181	ENSG00000121964.14	ENST00000542155.5	0	CPG_ov	144331905	144332905	5.84	Promoter (<=1kb)	2
FAM86GP	1.64	0.000287	0.0208	ENSG00000166492.9	ENST00000448322.2	-365	CPG_ov	3422861	3423861	6.85	Promoter (<=1kb)	11
ATP2B1	1.64	0.000292	0.0209	ENSG00000070961.15	ENST00000551310.1	0	CPG_ov	89709037	89710037	6.78	Promoter (<=1kb)	12
UCK1	1.64	0.000428	0.0248	ENSG00000130717.12	ENST00000372210.7	0	CPG_ov	131530691	131531691	4.92	Promoter (<=1kb)	9
OR2V2	1.64	0.000484	0.0255	ENSG00000182613.1	ENST00000328275.1	4900	CPG_ov	181159843	181160843	4.32	Distal Intergenic	5
EIF4G1	1.64	0.00074	0.0299	ENSG00000114867.20	ENST00000350481.9	0	CPG_ov	184314576	184315576	6.14	Promoter (<=1kb)	3
CCDC57	1.64	0.000866	0.032	ENSG00000176155.18	ENST00000389641.8	0	CPG_ov	82212515	82213515	6.1	Promoter (<=1kb)	17
DCUN1D2	1.64	0.00107	0.0352	ENSG00000150401.14	ENST00000332592.7	0	CPG_ov	113490525	113491525	7.12	Promoter (<=1kb)	13
PAX8	1.64	0.0011	0.0355	ENSG00000125618.16	ENST00000429538.7	-45660	CPG_ov	113324610	113325610	6.24	Distal Intergenic	2
PPP2R3A	1.64	0.00111	0.0355	ENSG00000073711.10	ENST00000264977.7	0	CPG_ov	135965250	135966250	6.9	Promoter (<=1kb)	3
ARHGEF1	1.64	0.00137	0.0382	ENSG00000076928.17	ENST00000595770.1	11003	CPG_ov	41939823	41940823	5.44	Distal Intergenic	19
DNASE1L1	1.64	0.00146	0.0391	ENSG00000013563.13	ENST00000369809.5	0	CPG_ov	154411503	154412503	4.78	Promoter (<=1kb)	23
ROCK2	1.64	0.00152	0.0397	ENSG00000134318.13	ENST00000315872.10	0	CPG_ov	11344440	11345440	6.48	Promoter (<=1kb)	2
CELF5	1.64	0.00158	0.0402	ENSG00000161082.12	ENST00000589370.1	8	CPG_ov	3270629	3271629	4.71	Promoter (<=1kb)	19
FOXD2	1.64	0.00167	0.0414	ENSG00000186564.5	ENST00000334793.5	1339	CPG_ov	47437356	47438356	7.05	Promoter (1-2kb)	1
XRCC2	1.64	0.00204	0.0449	ENSG00000196584.2	ENST00000359321.1	0	CPG_ov	152675705	152676705	4.61	Promoter (<=1kb)	7
CTA-223H9.9	1.64	0.00216	0.0459	ENSG00000273424.1	ENST00000609612.1	-16597	CPG_ov	41413337	41414337	6.92	Distal Intergenic	22
URB2	1.64	0.0023	0.047	ENSG00000135763.9	ENST00000258243.6	0	CPG_ov	229625842	229626842	6.12	Promoter (<=1kb)	1
UNKL	1.63	0.000293	0.0209	ENSG00000059145.18	ENST00000248104.11	0	CPG_ov	1378863	1379863	4.88	Promoter (<=1kb)	16
TMEM87B	1.63	0.000304	0.0212	ENSG00000153214.9	ENST00000283206.8	0	CPG_ov	112054725	112055725	6.49	Promoter (<=1kb)	2
CYB5R1	1.63	0.000315	0.0215	ENSG00000159348.12	ENST00000367249.8	0	CPG_ov	202966978	202967978	5.39	Promoter (<=1kb)	1
ACAP1	1.63	0.000418	0.0245	ENSG00000072818.11	ENST00000575415.1	0	CPG_ov	7350634	7351634	5.7	Promoter (<=1kb)	17
WLS	1.63	0.000534	0.0265	ENSG00000116729.13	ENST00000354777.6	0	CPG_ov	68231594	68232594	6.19	Promoter (<=1kb)	1
C19orf60	1.63	0.000665	0.029	ENSG00000006015.17	ENST00000598375.5	0	CPG_ov	18588449	18589449	6.03	Promoter (<=1kb)	19
RAP1A	1.63	0.000724	0.0297	ENSG00000116473.14	ENST00000433097.5	0	CPG_ov	111619547	111620547	7.4	Promoter (<=1kb)	1
MYADM	1.63	0.000845	0.0316	ENSG00000179820.15	ENST00000391769.2	0	CPG_ov	53868730	53869730	7.11	Promoter (<=1kb)	19
VOPP1	1.63	0.00085	0.0317	ENSG00000154978.12	ENST00000462326.5	0	CPG_ov	55571464	55572464	5.99	Promoter (<=1kb)	7
PPP2R2C	1.63	0.000911	0.0326	ENSG00000074211.13	ENST00000507028.1	0	CPG_ov	6470953	6471953	4.85	Promoter (<=1kb)	4
XIAP	1.63	0.00113	0.0357	ENSG00000101966.12	ENST00000422098.5	0	CPG_ov	123859549	123860549	6.28	Promoter (<=1kb)	23
PRKCE	1.63	0.00114	0.0358	ENSG00000171132.13	ENST00000421201.1	0	CPG_ov	45650355	45651355	6.24	Promoter (<=1kb)	2
WFS1	1.63	0.00117	0.0361	ENSG00000109501.13	ENST00000503569.5	0	CPG_ov	6269294	6270294	5.47	Promoter (<=1kb)	4
CTD-2270P14.1	1.63	0.00119	0.0365	ENSG00000260565.6	ENST00000564340.1	0	CPG_ov	2673219	2674219	6.4	Promoter (<=1kb)	16
HIP1	1.63	0.0012	0.0365	ENSG00000127946.16	ENST00000336926.10	0	CPG_ov	75738753	75739753	7.31	Promoter (<=1kb)	7
PPFIA2	1.63	0.00229	0.047	ENSG00000139220.16	ENST00000549396.5	0	CPG_ov	81758352	81759352	5.32	Promoter (<=1kb)	12
ATF1	1.62	0.000122	0.0134	ENSG00000123268.8	ENST00000552510.5	0	CPG_ov	50763500	50764500	6.76	Promoter (<=1kb)	12
PHF7	1.62	0.000144	0.0144	ENSG00000010318.20	ENST00000327906.7	0	CPG_ov	52409991	52410991	5.82	Promoter (<=1kb)	3
ZBTB2	1.62	0.000309	0.0213	ENSG00000181472.4	ENST00000325144.4	377	CPG_ov	151390171	151391171	7.62	Promoter (<=1kb)	6
KLF9	1.62	0.000396	0.0238	ENSG00000119138.4	ENST00000377126.3	-4540	CPG_ov	70419164	70420164	7.3	Distal Intergenic	9
MBTD1	1.62	0.000399	0.0239	ENSG00000011258.15	ENST00000586178.5	0	CPG_ov	51259524	51260524	7.39	Promoter (<=1kb)	17
AC025335.1	1.62	0.000529	0.0265	ENSG00000179859.8	ENST00000324348.8	0	CPG_ov	7915577	7916577	5.75	Promoter (<=1kb)	17
DEXI	1.62	0.000687	0.0292	ENSG00000182108.9	ENST00000469379.5	0	CPG_ov	10941937	10942937	6.67	Promoter (<=1kb)	16
BAIAP2	1.62	0.000701	0.0293	ENSG00000175866.15	ENST00000321280.11	0	CPG_ov	81034248	81035248	6.29	Promoter (<=1kb)	17
TMEM145	1.62	0.00077	0.0305	ENSG00000167619.11	ENST00000595775.5	0	CPG_ov	42313137	42314137	5.45	Promoter (<=1kb)	19
TXN	1.62	0.00101	0.0343	ENSG00000136810.12	ENST00000374515.9	0	CPG_ov	110256174	110257174	5.96	Promoter (<=1kb)	9
KIAA0100	1.62	0.00114	0.0358	ENSG00000007202.14	ENST00000528896.6	0	CPG_ov	28644915	28645915	5.99	Promoter (<=1kb)	17
ZCCHC24	1.62	0.00146	0.0391	ENSG00000165424.6	ENST00000372336.3	0	CPG_ov	79445311	79446311	7.15	Promoter (<=1kb)	10
ITPR2	1.62	0.00209	0.0454	ENSG00000123104.11	ENST00000381340.7	0	CPG_ov	26832679	26833679	6.58	Promoter (<=1kb)	12
CTNND2	1.62	0.0021	0.0454	ENSG00000169862.18	ENST00000304623.12	0	CPG_ov	11903283	11904283	5.08	Promoter (<=1kb)	5
KCNC4-AS1	1.62	0.00224	0.0464	ENSG00000224965.1	ENST00000455967.1	0	CPG_ov	110209852	110210852	5.91	Promoter (<=1kb)	1
NSMF	1.62	0.0023	0.047	ENSG00000165802.20	ENST00000265663.11	0	CPG_ov	137458851	137459851	4.75	Promoter (<=1kb)	9
ANKRD27	1.61	0.0001	0.0119	ENSG00000105186.15	ENST00000306065.8	0	CPG_ov	32674809	32675809	7.43	Promoter (<=1kb)	19
LDLR	1.61	0.000215	0.0179	ENSG00000130164.12	ENST00000252444.9	0	CPG_ov	11089802	11090802	6.44	Promoter (<=1kb)	19
CARS2	1.61	0.000223	0.0182	ENSG00000134905.16	ENST00000257347.8	0	CPG_ov	110705792	110706792	6.32	Promoter (<=1kb)	13
TBCC	1.61	0.000237	0.0187	ENSG00000124659.6	ENST00000372876.1	0	CPG_ov	42745828	42746828	7.61	Promoter (<=1kb)	6
MSN	1.61	0.000284	0.0208	ENSG00000147065.16	ENST00000360270.6	472	no_CPG	65668142	65669142	5.95	Promoter (<=1kb)	23
RP11-473M20.16	1.61	0.000347	0.0224	ENSG00000261889.1	ENST00000570843.1	-394	CPG_ov	3157877	3158877	6.98	Promoter (<=1kb)	16
DNLZ	1.61	0.000439	0.025	ENSG00000213221.4	ENST00000371739.3	0	CPG_ov	136362877	136363877	6.02	Promoter (<=1kb)	9
TUBA1C	1.61	0.000566	0.0271	ENSG00000167553.14	ENST00000301072.10	0	CPG_ov	49264521	49265521	7.09	Promoter (<=1kb)	12
TMCC1	1.61	0.000651	0.0287	ENSG00000172765.16	ENST00000426664.6	0	CPG_ov	129893002	129894002	6.65	Promoter (<=1kb)	3
HMGA1	1.61	0.000678	0.029	ENSG00000137309.19	ENST00000447654.5	0	CPG_ov	34236474	34237474	6.24	Promoter (<=1kb)	6
MCM3AP	1.61	0.000838	0.0316	ENSG00000160294.10	ENST00000397708.1	0	CPG_ov	46285965	46286965	6.15	Promoter (<=1kb)	21
AP4S1	1.61	0.000859	0.0319	ENSG00000100478.14	ENST00000555417.5	0	CPG_ov	31025959	31026959	7.47	Promoter (<=1kb)	14
SNX6	1.61	0.000981	0.0338	ENSG00000129515.18	ENST00000396526.7	0	CPG_ov	34629352	34630352	5.91	Promoter (<=1kb)	14
TAB2	1.61	0.00105	0.0349	ENSG00000055208.18	ENST00000636456.1	0	CPG_ov	149316831	149317831	7.45	Promoter (<=1kb)	6
PTPN12	1.61	0.00113	0.0357	ENSG00000127947.15	ENST00000248594.10	0	CPG_ov	77536903	77537903	7.3	Promoter (<=1kb)	7
BRI3	1.61	0.00132	0.0378	ENSG00000164713.9	ENST00000539286.5	0	CPG_ov	98280916	98281916	6.92	Promoter (<=1kb)	7
PDLIM2	1.61	0.00139	0.0385	ENSG00000120913.23	ENST00000614502.4	0	no_CPG	22588665	22589665	4.96	Promoter (<=1kb)	8
KAT2B	1.61	0.00146	0.0391	ENSG00000114166.7	ENST00000263754.4	0	CPG_ov	20039481	20040481	6.77	Promoter (<=1kb)	3
ZNF135	1.61	0.00153	0.0398	ENSG00000176293.19	ENST00000359978.10	0	CPG_ov	58058904	58059904	5.78	Promoter (<=1kb)	19
RAB11FIP5	1.61	0.00158	0.0403	ENSG00000135631.16	ENST00000486777.6	0	CPG_ov	73112328	73113328	5.88	Promoter (<=1kb)	2
IGSF8	1.61	0.00172	0.0418	ENSG00000162729.13	ENST00000314485.11	0	CPG_ov	160098210	160099210	6.32	Promoter (<=1kb)	1
SH3RF1	1.61	0.00252	0.0486	ENSG00000154447.14	ENST00000284637.13	0	CPG_ov	169270634	169271634	6	Promoter (<=1kb)	4
CTBP2	1.61	0.00259	0.0493	ENSG00000175029.16	ENST00000337195.9	0	CPG_ov	125160175	125161175	6.41	Promoter (<=1kb)	10
USP3	1.6	4.67e-05	0.00799	ENSG00000140455.16	ENST00000540797.5	0	CPG_ov	63503907	63504907	7.46	Promoter (<=1kb)	15
PGRMC1	1.6	0.000467	0.0253	ENSG00000101856.9	ENST00000535419.2	0	CPG_ov	119235731	119236731	5.27	Promoter (<=1kb)	23
AFF4	1.6	0.00047	0.0253	ENSG00000072364.12	ENST00000265343.9	0	CPG_ov	132963266	132964266	7.47	Promoter (<=1kb)	5
RCE1	1.6	0.000475	0.0254	ENSG00000173653.7	ENST00000533277.5	0	CPG_ov	66842791	66843791	5.29	Promoter (<=1kb)	11
TFAP4	1.6	0.000501	0.0258	ENSG00000090447.11	ENST00000573476.1	43	CPG_ov	4271788	4272788	6.52	Promoter (<=1kb)	16
POLD4	1.6	0.000504	0.0258	ENSG00000175482.8	ENST00000529704.5	0	CPG_ov	67353134	67354134	7.09	Promoter (<=1kb)	11
CEP85L	1.6	0.000538	0.0266	ENSG00000111860.13	ENST00000368491.7	0	CPG_ov	118651148	118652148	6.8	Promoter (<=1kb)	6
MMD	1.6	0.000558	0.0269	ENSG00000108960.7	ENST00000262065.7	0	CPG_ov	55421511	55422511	6.02	Promoter (<=1kb)	17
TEAD4	1.6	0.000606	0.0278	ENSG00000197905.8	ENST00000358409.6	0	CPG_ov	2958454	2959454	6.9	Promoter (<=1kb)	12
SDR42E1	1.6	0.000646	0.0286	ENSG00000184860.9	ENST00000328945.6	0	CPG_ov	82010861	82011861	5.3	Promoter (<=1kb)	16
RP11-283G6.3	1.6	0.000843	0.0316	ENSG00000256894.1	ENST00000535914.1	0	CPG_ov	26125736	26126736	6.88	Promoter (<=1kb)	12
RP11-338C15.3	1.6	0.00109	0.0353	ENSG00000237980.1	ENST00000446962.1	0	no_CPG	212665076	212666076	6.31	Promoter (<=1kb)	1
PAK1	1.6	0.00141	0.0386	ENSG00000149269.9	ENST00000356341.7	0	CPG_ov	77473645	77474645	6.94	Promoter (<=1kb)	11
DCTD	1.6	0.00142	0.0386	ENSG00000129187.14	ENST00000500813.6	0	CPG_ov	182916654	182917654	5.43	Promoter (<=1kb)	4
LPCAT1	1.6	0.00154	0.0399	ENSG00000153395.9	ENST00000475622.5	0	CPG_ov	1523651	1524651	4.77	Promoter (<=1kb)	5
NR3C1	1.6	0.00161	0.0406	ENSG00000113580.14	ENST00000394466.6	0	CPG_ov	143404050	143405050	6.71	Promoter (<=1kb)	5
MYO15B	1.6	0.00196	0.0442	ENSG00000266714.6	ENST00000578564.5	-392	CPG_ov	75588949	75589949	4.82	Promoter (<=1kb)	17
TBC1D14	1.6	0.00222	0.0462	ENSG00000132405.18	ENST00000444368.1	0	CPG_ov	6909151	6910151	5.89	Promoter (<=1kb)	4
PFKP	1.6	0.00222	0.0463	ENSG00000067057.16	ENST00000381075.6	0	CPG_ov	3067948	3068948	4.3	Promoter (<=1kb)	10
SPTBN1	1.6	0.00229	0.047	ENSG00000115306.15	ENST00000356805.8	0	CPG_ov	54455889	54456889	6.84	Promoter (<=1kb)	2
WWC2	1.6	0.00245	0.0482	ENSG00000151718.15	ENST00000403733.7	0	CPG_ov	183098378	183099378	6.71	Promoter (<=1kb)	4
RP11-1102P16.1	1.6	0.00254	0.0488	ENSG00000253379.5	ENST00000523987.4	0	CPG_ov	71546988	71547988	4.01	Promoter (<=1kb)	8
APEH	1.59	0.000221	0.0181	ENSG00000164062.12	ENST00000296456.9	0	CPG_ov	49673573	49674573	7.66	Promoter (<=1kb)	3
LCORL	1.59	0.000235	0.0186	ENSG00000178177.15	ENST00000326877.8	0	CPG_ov	18021446	18022446	7.24	Promoter (<=1kb)	4
FIBCD1	1.59	0.000303	0.0212	ENSG00000130720.12	ENST00000463475.1	-19694	no_CPG	130958980	130959980	5.08	Distal Intergenic	9
C1orf159	1.59	0.000406	0.0241	ENSG00000131591.17	ENST00000379339.5	0	CPG_ov	1115694	1116694	6.54	Promoter (<=1kb)	1
ANKRD36	1.59	0.00046	0.0253	ENSG00000135976.16	ENST00000461153.6	0	CPG_ov	97112754	97113754	6.27	Promoter (<=1kb)	2
LARP1	1.59	0.000496	0.0258	ENSG00000155506.16	ENST00000518297.5	0	CPG_ov	154754775	154755775	7.22	Promoter (<=1kb)	5
TTYH3	1.59	0.000586	0.0274	ENSG00000136295.14	ENST00000258796.11	0	CPG_ov	2631174	2632174	6.85	Promoter (<=1kb)	7
KLHL9	1.59	0.000801	0.031	ENSG00000198642.6	ENST00000359039.4	0	CPG_ov	21334983	21335983	5.56	Promoter (<=1kb)	9
USP25	1.59	0.000843	0.0316	ENSG00000155313.15	ENST00000285679.10	0	CPG_ov	15729457	15730457	6.29	Promoter (<=1kb)	21
CAMSAP2	1.59	0.000915	0.0326	ENSG00000118200.14	ENST00000358823.6	0	CPG_ov	200738685	200739685	7.05	Promoter (<=1kb)	1
SLC4A2	1.59	0.000936	0.0329	ENSG00000164889.13	ENST00000413384.6	0	CPG_ov	151058865	151059865	5.14	Promoter (<=1kb)	7
KLF2	1.59	0.00128	0.0374	ENSG00000127528.5	ENST00000248071.5	0	CPG_ov	16324247	16325247	5.58	Promoter (<=1kb)	19
NR4A2	1.59	0.00129	0.0375	ENSG00000153234.13	ENST00000409572.5	0	CPG_ov	156341494	156342494	7.63	Promoter (<=1kb)	2
DUSP3	1.59	0.0014	0.0385	ENSG00000108861.8	ENST00000226004.7	0	CPG_ov	43778242	43779242	6.78	Promoter (<=1kb)	17
GALK1	1.59	0.00154	0.0399	ENSG00000108479.11	ENST00000225614.6	0	CPG_ov	75764417	75765417	5.72	Promoter (<=1kb)	17
SLC1A4	1.59	0.00169	0.0416	ENSG00000115902.10	ENST00000493121.5	0	CPG_ov	64988469	64989469	7.66	Promoter (<=1kb)	2
MRPS2	1.59	0.00193	0.0439	ENSG00000122140.10	ENST00000371785.5	0	CPG_ov	135499693	135500693	6.46	Promoter (<=1kb)	9
INSIG1	1.59	0.00218	0.0459	ENSG00000186480.12	ENST00000344756.8	0	CPG_ov	155297277	155298277	4.91	Promoter (<=1kb)	7
WHRN	1.59	0.00259	0.0494	ENSG00000095397.13	ENST00000374057.3	0	CPG_ov	114505064	114506064	5.27	Promoter (<=1kb)	9
POMT2	1.58	0.00032	0.0216	ENSG00000009830.11	ENST00000261534.8	0	CPG_ov	77320512	77321512	7.92	Promoter (<=1kb)	14
C14orf28	1.58	0.000389	0.0237	ENSG00000179476.7	ENST00000325192.7	0	CPG_ov	44896699	44897699	7.61	Promoter (<=1kb)	14
UNC45A	1.58	0.000417	0.0245	ENSG00000140553.16	ENST00000495068.5	0	CPG_ov	90934877	90935877	6.39	Promoter (<=1kb)	15
ULK3	1.58	0.000452	0.0253	ENSG00000140474.12	ENST00000440863.6	0	CPG_ov	74842833	74843833	5.79	Promoter (<=1kb)	15
ALG1L9P	1.58	0.000538	0.0266	ENSG00000248671.7	ENST00000511954.5	0	CPG_ov	71813325	71814325	5.11	Promoter (<=1kb)	11
STRADB	1.58	0.000541	0.0266	ENSG00000082146.12	ENST00000194530.7	0	CPG_ov	201451111	201452111	6.85	Promoter (<=1kb)	2
LINC00959	1.58	0.000547	0.0268	ENSG00000237489.3	ENST00000637128.1	0	CPG_ov	130110250	130111250	7.02	Promoter (<=1kb)	10
SRCAP	1.58	0.000555	0.0269	ENSG00000080603.16	ENST00000411466.6	0	CPG_ov	30698010	30699010	7.47	Promoter (<=1kb)	16
DLG1	1.58	0.000573	0.0272	ENSG00000075711.20	ENST00000346964.6	0	CPG_ov	197298116	197299116	7.41	Promoter (<=1kb)	3
TSPAN14	1.58	0.00062	0.0281	ENSG00000108219.14	ENST00000429989.7	0	CPG_ov	80453665	80454665	5.83	Promoter (<=1kb)	10
NCOA2	1.58	0.000687	0.0292	ENSG00000140396.12	ENST00000518287.6	0	CPG_ov	70401964	70402964	7.93	Promoter (<=1kb)	8
MYCBP2	1.58	0.000722	0.0296	ENSG00000005810.17	ENST00000544440.6	0	CPG_ov	77326646	77327646	6.39	Promoter (<=1kb)	13
KDM3B	1.58	0.000727	0.0297	ENSG00000120733.13	ENST00000314358.9	0	CPG_ov	138352449	138353449	5.44	Promoter (<=1kb)	5
RP11-9M16.2	1.58	0.000772	0.0305	ENSG00000235119.1	ENST00000448674.1	0	CPG_ov	114398065	114399065	6.55	Promoter (<=1kb)	9
ELL2	1.58	0.000927	0.0328	ENSG00000118985.15	ENST00000237853.8	0	CPG_ov	95961422	95962422	7.96	Promoter (<=1kb)	5
PRKRA	1.58	0.000994	0.034	ENSG00000180228.12	ENST00000325748.8	0	CPG_ov	178450668	178451668	7.39	Promoter (<=1kb)	2
FN3KRP	1.58	0.00102	0.0347	ENSG00000141560.14	ENST00000269373.10	0	CPG_ov	82716007	82717007	6	Promoter (<=1kb)	17
CERS5	1.58	0.00105	0.0349	ENSG00000139624.12	ENST00000422340.6	0	CPG_ov	50167056	50168056	6.64	Promoter (<=1kb)	12
FJX1	1.58	0.00106	0.035	ENSG00000179431.6	ENST00000317811.5	0	CPG_ov	35617629	35618629	6.47	Promoter (<=1kb)	11
RRM2B	1.58	0.00112	0.0356	ENSG00000048392.11	ENST00000251810.7	0	CPG_ov	102238752	102239752	8.11	Promoter (<=1kb)	8
TOB1	1.58	0.00117	0.0361	ENSG00000141232.4	ENST00000499247.2	0	CPG_ov	50866091	50867091	7.3	Promoter (<=1kb)	17
XYLT2	1.58	0.00134	0.0379	ENSG00000015532.9	ENST00000017003.6	0	CPG_ov	50345676	50346676	5.4	Promoter (<=1kb)	17
CDC42	1.58	0.00145	0.039	ENSG00000070831.15	ENST00000400259.5	0	CPG_ov	22052370	22053370	5.77	Promoter (<=1kb)	1
ARID1B	1.58	0.00162	0.0407	ENSG00000049618.22	ENST00000635849.1	0	CPG_ov	157021387	157022387	6.75	Promoter (<=1kb)	6
ANKRD13D	1.58	0.00174	0.042	ENSG00000172932.14	ENST00000447274.6	0	CPG_ov	67288489	67289489	6.38	Promoter (<=1kb)	11
ACHE	1.58	0.002	0.0446	ENSG00000087085.13	ENST00000411582.1	109	CPG_ov	100894752	100895752	5.68	Promoter (<=1kb)	7
RNF213	1.58	0.00213	0.0456	ENSG00000173821.19	ENST00000508628.6	0	CPG_ov	80260646	80261646	6.24	Promoter (<=1kb)	17
SNTA1	1.58	0.00214	0.0458	ENSG00000101400.5	ENST00000217381.2	0	CPG_ov	33443345	33444345	6.2	Promoter (<=1kb)	20
ST5	1.58	0.00227	0.0467	ENSG00000166444.18	ENST00000534127.5	0	CPG_ov	8910649	8911649	6.94	Promoter (<=1kb)	11
CAST	1.57	6.23e-05	0.00942	ENSG00000153113.23	ENST00000395813.5	0	CPG_ov	96702260	96703260	6.84	Promoter (<=1kb)	5
CCNE1	1.57	0.000113	0.0128	ENSG00000105173.13	ENST00000574121.1	22870	CPG_ov	29844602	29845602	7.58	Distal Intergenic	19
UBTD2	1.57	0.000174	0.0159	ENSG00000168246.5	ENST00000393792.2	236	CPG_ov	172282835	172283835	5.82	Promoter (<=1kb)	5
ZBTB8B	1.57	0.000454	0.0253	ENSG00000273274.1	ENST00000609129.1	34539	CPG_ov	32499608	32500608	4.56	Intron (ENST00000480336.1/ENSG00000254553.1, intron 4 of 9)	1
IST1	1.57	0.000535	0.0266	ENSG00000182149.20	ENST00000568581.5	0	CPG_ov	71845454	71846454	5.12	Promoter (<=1kb)	16
CSNK1E	1.57	0.000622	0.0281	ENSG00000213923.10	ENST00000430335.1	0	CPG_ov	38316313	38317313	6.63	Promoter (<=1kb)	22
C17orf64	1.57	0.000714	0.0295	ENSG00000141371.12	ENST00000461535.1	0	CPG_ov	60391956	60392956	8.31	Promoter (<=1kb)	17
SAP130	1.57	0.000764	0.0304	ENSG00000136715.17	ENST00000259234.10	0	CPG_ov	128027459	128028459	7.83	Promoter (<=1kb)	2
EHD2	1.57	0.000856	0.0318	ENSG00000024422.11	ENST00000540884.1	0	no_CPG	47729551	47730551	6.94	Promoter (<=1kb)	19
PTK2	1.57	0.00093	0.0328	ENSG00000169398.19	ENST00000522684.5	0	CPG_ov	141001031	141002031	7.4	Promoter (<=1kb)	8
HP1BP3	1.57	0.00103	0.0347	ENSG00000127483.17	ENST00000312239.9	0	CPG_ov	20786474	20787474	6.78	Promoter (<=1kb)	1
GPRIN1	1.57	0.00123	0.037	ENSG00000169258.6	ENST00000303991.4	-181	CPG_ov	176610314	176611314	5.02	Promoter (<=1kb)	5
UBA3	1.57	0.00149	0.0394	ENSG00000144744.16	ENST00000415609.6	0	CPG_ov	69079753	69080753	5.99	Promoter (<=1kb)	3
MAST1	1.57	0.00152	0.0396	ENSG00000105613.9	ENST00000591495.5	0	CPG_ov	12833423	12834423	5.67	Promoter (<=1kb)	19
LETM1	1.57	0.00159	0.0404	ENSG00000168924.14	ENST00000302787.2	0	CPG_ov	1855731	1856731	5.44	Promoter (<=1kb)	4
RPS6KA6	1.57	0.00178	0.0424	ENSG00000072133.10	ENST00000262752.4	0	CPG_ov	84187786	84188786	5.2	Promoter (<=1kb)	23
KEAP1	1.57	0.00203	0.0448	ENSG00000079999.13	ENST00000393623.6	0	CPG_ov	10502491	10503491	5.97	Promoter (<=1kb)	19
AC013461.1	1.57	0.00207	0.0453	ENSG00000091436.16	ENST00000409176.6	0	CPG_ov	173075496	173076496	5.54	Promoter (<=1kb)	2
ADGRE3	1.57	0.00217	0.0459	ENSG00000131355.14	ENST00000599900.5	0	no_CPG	14689431	14690431	5.69	Promoter (<=1kb)	19
EGR1	1.57	0.00219	0.046	ENSG00000120738.7	ENST00000239938.4	0	CPG_ov	138465006	138466006	7.71	Promoter (<=1kb)	5
UBE2E1	1.57	0.0022	0.046	ENSG00000170142.11	ENST00000306627.7	0	CPG_ov	23805681	23806681	4.61	Promoter (<=1kb)	3
RP11-213G2.3	1.57	0.0024	0.0478	ENSG00000165121.11	ENST00000637846.1	0	CPG_ov	85804903	85805903	5.82	Promoter (<=1kb)	9
CCSER2	1.57	0.00254	0.0488	ENSG00000107771.15	ENST00000359979.8	0	CPG_ov	84328518	84329518	5.02	Promoter (<=1kb)	10
OLA1	1.56	0.000316	0.0215	ENSG00000138430.15	ENST00000284719.7	0	CPG_ov	174248176	174249176	6.77	Promoter (<=1kb)	2
POMGNT1	1.56	0.000355	0.0226	ENSG00000085998.13	ENST00000371984.7	0	no_CPG	46197803	46198803	5.44	Promoter (<=1kb)	1
SLC17A7	1.56	0.000443	0.0251	ENSG00000104888.9	ENST00000600601.5	-228	CPG_ov	49442588	49443588	6.56	Promoter (<=1kb)	19
BHLHE40	1.56	0.000475	0.0254	ENSG00000134107.4	ENST00000256495.3	0	CPG_ov	4978576	4979576	7.98	Promoter (<=1kb)	3
MLST8	1.56	0.00048	0.0254	ENSG00000167965.17	ENST00000568542.5	0	CPG_ov	2205234	2206234	6.02	Promoter (<=1kb)	16
ZBTB18	1.56	0.000513	0.026	ENSG00000179456.10	ENST00000622512.1	-50	CPG_ov	244047889	244048889	7.22	Promoter (<=1kb)	1
ODF2	1.56	0.000582	0.0273	ENSG00000136811.16	ENST00000351030.7	0	CPG_ov	128456002	128457002	7.04	Promoter (<=1kb)	9
IL6ST	1.56	0.000708	0.0294	ENSG00000134352.19	ENST00000381298.6	0	CPG_ov	55994556	55995556	7.36	Promoter (<=1kb)	5
DNAAF2	1.56	0.000711	0.0294	ENSG00000165506.14	ENST00000298292.12	247	CPG_ov	49633983	49634983	7.79	Promoter (<=1kb)	14
CDH15	1.56	0.000733	0.0298	ENSG00000129910.7	ENST00000521087.5	0	CPG_ov	89171103	89172103	4.91	Promoter (<=1kb)	16
DCAF1	1.56	0.000881	0.0322	ENSG00000145041.15	ENST00000423656.5	0	CPG_ov	51499205	51500205	7.71	Promoter (<=1kb)	3
PLEKHA5	1.56	0.000914	0.0326	ENSG00000052126.14	ENST00000540972.5	0	CPG_ov	19129577	19130577	5.44	Promoter (<=1kb)	12
CARS2	1.56	0.000964	0.0334	ENSG00000134905.16	ENST00000535398.5	0	CPG_ov	110712710	110713710	7.47	Promoter (<=1kb)	13
GGN	1.56	0.00118	0.0364	ENSG00000179168.14	ENST00000334928.10	0	CPG_ov	38387880	38388880	6.55	Promoter (<=1kb)	19
TSC22D1	1.56	0.0014	0.0386	ENSG00000102804.14	ENST00000493016.1	0	CPG_ov	44576889	44577889	6.62	Promoter (<=1kb)	13
SCAF8	1.56	0.00144	0.0389	ENSG00000213079.9	ENST00000464628.1	0	CPG_ov	154733549	154734549	7.59	Promoter (<=1kb)	6
JAG1	1.56	0.00151	0.0395	ENSG00000101384.11	ENST00000254958.9	0	CPG_ov	10673681	10674681	7.66	Promoter (<=1kb)	20
BATF3	1.56	0.00156	0.0399	ENSG00000123685.8	ENST00000478275.1	0	CPG_ov	212698752	212699752	5.72	Promoter (<=1kb)	1
AC079807.2	1.56	0.00159	0.0405	ENSG00000233230.1	ENST00000417692.1	0	CPG_ov	47906149	47907149	8.39	Promoter (<=1kb)	2
RP11-396C23.2	1.56	0.00169	0.0416	ENSG00000225518.2	ENST00000602806.1	0	CPG_ov	226083054	226084054	6.54	Promoter (<=1kb)	1
PCNX1	1.56	0.0019	0.0436	ENSG00000100731.15	ENST00000554879.5	0	CPG_ov	70907403	70908403	6.57	Promoter (<=1kb)	14
GPC4	1.56	0.00191	0.0436	ENSG00000076716.8	ENST00000370828.3	0	CPG_ov	133415322	133416322	4.34	Promoter (<=1kb)	23
ABHD17A	1.56	0.00191	0.0436	ENSG00000129968.15	ENST00000292577.11	0	CPG_ov	1884770	1885770	3.84	Promoter (<=1kb)	19
C3orf58	1.56	0.00215	0.0458	ENSG00000181744.8	ENST00000315691.7	0	CPG_ov	143971287	143972287	7.6	Promoter (<=1kb)	3
MTCH1	1.56	0.00236	0.0476	ENSG00000137409.19	ENST00000373616.9	0	CPG_ov	36985869	36986869	5.85	Promoter (<=1kb)	6
CDH22	1.56	0.00238	0.0478	ENSG00000149654.9	ENST00000537909.2	624	CPG_ov	46306874	46307874	5.46	Promoter (<=1kb)	20
DNAJC11	1.56	0.00243	0.0479	ENSG00000007923.15	ENST00000377577.9	0	CPG_ov	6701138	6702138	4.24	Promoter (<=1kb)	1
PPM1F	1.56	0.00257	0.0491	ENSG00000100034.13	ENST00000263212.9	0	CPG_ov	21952189	21953189	5.14	Promoter (<=1kb)	22
OR2V2	1.55	2.41e-05	0.0053	ENSG00000182613.1	ENST00000328275.1	14272	CPG_ov	181169215	181170215	5.4	Distal Intergenic	5
C22orf34	1.55	6.72e-05	0.00988	ENSG00000188511.12	ENST00000400023.5	-12147	no_CPG	49669689	49670689	4.99	Distal Intergenic	22
FAM86B3P	1.55	0.000104	0.0121	ENSG00000173295.7	ENST00000522601.5	0	CPG_ov	8227792	8228792	6.74	Promoter (<=1kb)	8
THAP7	1.55	0.00016	0.0153	ENSG00000184436.11	ENST00000498406.1	0	CPG_ov	21001625	21002625	7.29	Promoter (<=1kb)	22
PBX1	1.55	0.00023	0.0183	ENSG00000185630.18	ENST00000485769.5	0	no_CPG	164558505	164559505	7.25	Promoter (<=1kb)	1
WAS	1.55	0.000293	0.0209	ENSG00000015285.10	ENST00000450772.5	0	CPG_ov	48676011	48677011	6.12	Promoter (<=1kb)	23
NKX3-1	1.55	0.000592	0.0275	ENSG00000167034.9	ENST00000380871.4	0	CPG_ov	23682305	23683305	5.26	Promoter (<=1kb)	8
RPL6	1.55	0.000672	0.029	ENSG00000089009.15	ENST00000551291.6	0	CPG_ov	112418528	112419528	6.46	Promoter (<=1kb)	12
CNOT6L	1.55	0.000845	0.0316	ENSG00000138767.12	ENST00000512485.5	-33	CPG_ov	77819648	77820648	6.68	Promoter (<=1kb)	4
LINC00173	1.55	0.000866	0.032	ENSG00000196668.3	ENST00000480237.1	0	no_CPG	116533085	116534085	6.65	Promoter (<=1kb)	12
RRNAD1	1.55	0.000935	0.0329	ENSG00000143303.11	ENST00000368218.8	0	CPG_ov	156728163	156729163	6.59	Promoter (<=1kb)	1
CAV2	1.55	0.00102	0.0345	ENSG00000105971.14	ENST00000343213.2	0	CPG_ov	116499445	116500445	5.62	Promoter (<=1kb)	7
HECTD2	1.55	0.00105	0.0349	ENSG00000165338.16	ENST00000446394.5	0	CPG_ov	91409597	91410597	6.64	Promoter (<=1kb)	10
MAP7D3	1.55	0.00114	0.0358	ENSG00000129680.15	ENST00000370661.5	0	CPG_ov	136250865	136251865	4.17	Promoter (<=1kb)	23
CLOCK	1.55	0.00115	0.0359	ENSG00000134852.14	ENST00000513440.5	0	CPG_ov	55546451	55547451	7.73	Promoter (<=1kb)	4
NLK	1.55	0.00126	0.0372	ENSG00000087095.12	ENST00000583517.1	-6760	no_CPG	28033977	28034977	3.95	Distal Intergenic	17
VSIG10L	1.55	0.00131	0.0378	ENSG00000186806.5	ENST00000600663.1	171	CPG_ov	51338584	51339584	5.79	Promoter (<=1kb)	19
PSD3	1.55	0.00135	0.038	ENSG00000156011.16	ENST00000327040.12	0	CPG_ov	19013544	19014544	5.57	Promoter (<=1kb)	8
ATXN7L2	1.55	0.00139	0.0385	ENSG00000162650.16	ENST00000369870.7	0	CPG_ov	109483605	109484605	6.6	Promoter (<=1kb)	1
UPF1	1.55	0.00139	0.0385	ENSG00000005007.12	ENST00000601981.5	0	CPG_ov	18832244	18833244	4.21	Promoter (<=1kb)	19
PQLC1	1.55	0.00143	0.0386	ENSG00000122490.18	ENST00000357575.8	0	CPG_ov	79951333	79952333	4.55	Promoter (<=1kb)	18
GPR137	1.55	0.00145	0.039	ENSG00000173264.14	ENST00000539833.5	0	CPG_ov	64284981	64285981	6.69	Promoter (<=1kb)	11
DYRK2	1.55	0.0015	0.0395	ENSG00000127334.10	ENST00000543747.1	0	CPG_ov	67647865	67648865	6.32	Promoter (<=1kb)	12
TNFRSF12A	1.55	0.00173	0.042	ENSG00000006327.13	ENST00000571351.1	57	CPG_ov	3020447	3021447	7.97	Promoter (<=1kb)	16
MTMR3	1.55	0.00182	0.0429	ENSG00000100330.15	ENST00000401950.6	0	CPG_ov	29882782	29883782	6.87	Promoter (<=1kb)	22
PPP1R16A	1.55	0.00183	0.0429	ENSG00000160972.9	ENST00000526183.5	0	CPG_ov	144477638	144478638	7.66	Promoter (<=1kb)	8
STIM2	1.55	0.00184	0.0429	ENSG00000109689.14	ENST00000467087.5	0	CPG_ov	26860160	26861160	6.75	Promoter (<=1kb)	4
KANK1	1.55	0.00187	0.0433	ENSG00000107104.18	ENST00000382303.5	0	CPG_ov	469547	470547	4.45	Promoter (<=1kb)	9
RP11-834C11.14	1.55	0.002	0.0446	ENSG00000273046.1	ENST00000512206.1	521	no_CPG	54017631	54018631	8.03	Promoter (<=1kb)	12
EXOSC2	1.55	0.00201	0.0448	ENSG00000130713.15	ENST00000491115.6	-11042	CPG_ov	130681679	130682679	6.03	3' UTR	9
SLC7A1	1.55	0.00237	0.0478	ENSG00000139514.12	ENST00000380752.9	0	CPG_ov	29595019	29596019	5.22	Promoter (<=1kb)	13
EPB41	1.55	0.00246	0.0483	ENSG00000159023.19	ENST00000343067.8	0	CPG_ov	28886573	28887573	5.85	Promoter (<=1kb)	1
NAGS	1.55	0.00251	0.0486	ENSG00000161653.10	ENST00000592915.1	361	CPG_ov	44006409	44007409	6.9	Promoter (<=1kb)	17
FAM86EP	1.54	6.59e-05	0.0098	ENSG00000251669.5	ENST00000313946.12	0	CPG_ov	3955019	3956019	6.89	Promoter (<=1kb)	4
WDR45	1.54	0.000184	0.0165	ENSG00000196998.17	ENST00000376358.4	0	CPG_ov	49079612	49080612	5.17	Promoter (<=1kb)	23
RARA	1.54	0.00047	0.0253	ENSG00000131759.17	ENST00000394089.6	0	CPG_ov	40317703	40318703	7.22	Promoter (<=1kb)	17
NUMBL	1.54	0.000667	0.029	ENSG00000105245.9	ENST00000252891.8	0	CPG_ov	40690514	40691514	6.39	Promoter (<=1kb)	19
RHBDD1	1.54	0.000696	0.0292	ENSG00000144468.16	ENST00000424132.1	0	CPG_ov	226835533	226836533	6.59	Promoter (<=1kb)	2
KAT6A	1.54	0.000705	0.0293	ENSG00000083168.9	ENST00000265713.6	0	CPG_ov	42051854	42052854	6.62	Promoter (<=1kb)	8
ZBTB25	1.54	0.000821	0.0314	ENSG00000089775.11	ENST00000608382.5	0	CPG_ov	64503490	64504490	8.01	Promoter (<=1kb)	14
SOCS5	1.54	0.000823	0.0314	ENSG00000171150.7	ENST00000306503.5	0	CPG_ov	46698579	46699579	7.44	Promoter (<=1kb)	2
YES1	1.54	0.000831	0.0316	ENSG00000176105.13	ENST00000584307.5	0	CPG_ov	812012	813012	7.91	Promoter (<=1kb)	18
ATG16L2	1.54	0.000876	0.0322	ENSG00000168010.10	ENST00000321297.9	0	CPG_ov	72813725	72814725	6.8	Promoter (<=1kb)	11
NEPRO	1.54	0.00106	0.035	ENSG00000163608.14	ENST00000314400.9	0	CPG_ov	113019216	113020216	7.03	Promoter (<=1kb)	3
AMDHD1	1.54	0.00108	0.0353	ENSG00000139344.7	ENST00000266736.6	0	CPG_ov	95942488	95943488	6.14	Promoter (<=1kb)	12
MAN2A1	1.54	0.00111	0.0355	ENSG00000112893.9	ENST00000261483.4	0	CPG_ov	109689014	109690014	7.44	Promoter (<=1kb)	5
RUSC1	1.54	0.00113	0.0357	ENSG00000160753.15	ENST00000368347.8	0	CPG_ov	155323892	155324892	7.73	Promoter (<=1kb)	1
MIEN1	1.54	0.0012	0.0365	ENSG00000141741.11	ENST00000582963.1	0	CPG_ov	39730183	39731183	6.35	Promoter (<=1kb)	17
MSH3	1.54	0.00121	0.0368	ENSG00000113318.9	ENST00000265081.6	0	CPG_ov	80654522	80655522	6.89	Promoter (<=1kb)	5
ABTB1	1.54	0.00123	0.037	ENSG00000114626.17	ENST00000483857.5	0	CPG_ov	127672148	127673148	5.52	Promoter (<=1kb)	3
MEX3B	1.54	0.00135	0.0381	ENSG00000183496.5	ENST00000329713.4	0	CPG_ov	82045791	82046791	7.38	Promoter (<=1kb)	15
HIVEP1	1.54	0.00139	0.0385	ENSG00000095951.16	ENST00000487103.5	-223	CPG_ov	12010777	12011777	7.27	Promoter (<=1kb)	6
RNF145	1.54	0.00159	0.0404	ENSG00000145860.11	ENST00000521606.6	-40	CPG_ov	159208172	159209172	5.81	Promoter (<=1kb)	5
PPP4R2	1.54	0.0019	0.0436	ENSG00000163605.14	ENST00000356692.9	0	CPG_ov	72996439	72997439	7.53	Promoter (<=1kb)	3
BMPR2	1.54	0.00216	0.0459	ENSG00000204217.12	ENST00000374580.8	-42	CPG_ov	202375894	202376894	6.64	Promoter (<=1kb)	2
AK6P1	1.54	0.00217	0.0459	ENSG00000256614.1	ENST00000540219.1	97791	CPG_ov	34347272	34348272	6.05	Distal Intergenic	12
FAM193A	1.54	0.00218	0.0459	ENSG00000125386.15	ENST00000637812.1	0	CPG_ov	2536037	2537037	6.99	Promoter (<=1kb)	4
XKR6	1.54	0.00229	0.047	ENSG00000171044.10	ENST00000416569.2	0	CPG_ov	11201239	11202239	5.57	Promoter (<=1kb)	8
MSX1	1.54	0.00241	0.0479	ENSG00000163132.6	ENST00000382723.4	0	CPG_ov	4859031	4860031	6.06	Promoter (<=1kb)	4
BBC3	1.54	0.00241	0.0479	ENSG00000105327.16	ENST00000598636.1	0	CPG_ov	47226727	47227727	6.51	Promoter (<=1kb)	19
ZMIZ1-AS1	1.53	0.000375	0.0232	ENSG00000224596.7	ENST00000428862.5	-11384	CPG_ov	78973778	78974778	6.4	Intron (ENST00000456353.5/ENSG00000224596.7, intron 5 of 9)	10
TNRC18	1.53	0.000468	0.0253	ENSG00000182095.14	ENST00000430969.5	-345	CPG_ov	5423891	5424891	8.22	Promoter (<=1kb)	7
MAPKAP1	1.53	0.000566	0.0271	ENSG00000119487.16	ENST00000373511.6	0	CPG_ov	125706775	125707775	6.25	Promoter (<=1kb)	9
ZNF185	1.53	0.000588	0.0274	ENSG00000147394.18	ENST00000318504.11	-16163	CPG_ov	152897279	152898279	5.68	Distal Intergenic	23
MCIDAS	1.53	0.000677	0.029	ENSG00000234602.7	ENST00000513468.5	0	CPG_ov	55226813	55227813	6.69	Promoter (<=1kb)	5
LRP1	1.53	0.000823	0.0314	ENSG00000123384.13	ENST00000553277.5	-117	CPG_ov	57127376	57128376	7.05	Promoter (<=1kb)	12
BRWD3	1.53	0.000827	0.0315	ENSG00000165288.10	ENST00000373275.4	0	CPG_ov	80808922	80809922	5.8	Promoter (<=1kb)	23
POLR2H	1.53	0.000873	0.0321	ENSG00000163882.9	ENST00000430783.5	0	CPG_ov	184362679	184363679	7.73	Promoter (<=1kb)	3
YWHAZ	1.53	0.000888	0.0324	ENSG00000164924.17	ENST00000395958.5	0	CPG_ov	100951847	100952847	7.81	Promoter (<=1kb)	8
LYSMD4	1.53	0.000914	0.0326	ENSG00000183060.15	ENST00000604213.1	0	CPG_ov	99733084	99734084	6.46	Promoter (<=1kb)	15
SMG1P2	1.53	0.000994	0.034	ENSG00000205534.6	ENST00000566127.1	0	CPG_ov	29594811	29595811	6.3	Promoter (<=1kb)	16
OBSL1	1.53	0.00105	0.0349	ENSG00000124006.14	ENST00000462534.5	0	CPG_ov	219551875	219552875	6.53	Promoter (<=1kb)	2
ZBTB39	1.53	0.0011	0.0355	ENSG00000166860.2	ENST00000300101.2	0	CPG_ov	57005944	57006944	4.88	Promoter (<=1kb)	12
GOLGA8B	1.53	0.0011	0.0355	ENSG00000215252.11	ENST00000564575.5	0	CPG_ov	34583393	34584393	5.83	Promoter (<=1kb)	15
ZNF558	1.53	0.00114	0.0358	ENSG00000167785.8	ENST00000601372.5	0	CPG_ov	8832171	8833171	6.67	Promoter (<=1kb)	19
SAE1	1.53	0.00144	0.0388	ENSG00000142230.11	ENST00000594144.5	0	CPG_ov	47112404	47113404	7.84	Promoter (<=1kb)	19
JADE1	1.53	0.00155	0.0399	ENSG00000077684.15	ENST00000610919.4	0	CPG_ov	128811142	128812142	6.98	Promoter (<=1kb)	4
AMPD2	1.53	0.00158	0.0403	ENSG00000116337.15	ENST00000531203.5	0	no_CPG	109620418	109621418	6.76	Promoter (<=1kb)	1
CNOT2	1.53	0.00161	0.0406	ENSG00000111596.11	ENST00000552231.5	0	CPG_ov	70242944	70243944	6.29	Promoter (<=1kb)	12
FOSL2	1.53	0.00161	0.0406	ENSG00000075426.11	ENST00000379619.5	0	CPG_ov	28392484	28393484	7.08	Promoter (<=1kb)	2
STK3	1.53	0.00171	0.0417	ENSG00000104375.15	ENST00000617590.1	0	CPG_ov	98825091	98826091	6.5	Promoter (<=1kb)	8
FGFRL1	1.53	0.00203	0.0448	ENSG00000127418.14	ENST00000510644.5	0	CPG_ov	1010935	1011935	4.94	Promoter (<=1kb)	4
SYT5	1.53	0.00209	0.0454	ENSG00000129990.14	ENST00000590859.1	0	CPG_ov	55173700	55174700	6.53	Promoter (<=1kb)	19
GLTSCR1	1.53	0.00209	0.0454	ENSG00000063169.10	ENST00000396720.7	0	CPG_ov	47608105	47609105	6.64	Promoter (<=1kb)	19
LRFN4	1.53	0.00215	0.0458	ENSG00000173621.8	ENST00000531590.1	0	CPG_ov	66855920	66856920	6.03	Promoter (<=1kb)	11
AC016700.5	1.53	0.00248	0.0484	ENSG00000231327.1	ENST00000414141.1	-16431	CPG_ov	70141748	70142748	6.52	Distal Intergenic	2
LSM14B	1.52	0.000102	0.012	ENSG00000149657.19	ENST00000370915.5	-169	CPG_ov	62121292	62122292	7.09	Promoter (<=1kb)	20
CNP	1.52	0.000312	0.0213	ENSG00000173786.16	ENST00000393892.7	0	CPG_ov	41966397	41967397	6.17	Promoter (<=1kb)	17
NSMCE4A	1.52	0.00039	0.0237	ENSG00000107672.14	ENST00000369023.7	0	CPG_ov	121974656	121975656	5.43	Promoter (<=1kb)	10
TEX261	1.52	0.000418	0.0245	ENSG00000144043.11	ENST00000272438.8	0	CPG_ov	70994519	70995519	6.26	Promoter (<=1kb)	2
UBR5	1.52	0.000419	0.0246	ENSG00000104517.12	ENST00000520539.5	0	CPG_ov	102412356	102413356	7.17	Promoter (<=1kb)	8
PRX	1.52	0.000474	0.0254	ENSG00000105227.14	ENST00000599513.1	3519	CPG_ov	40403724	40404724	6.32	Exon (ENST00000291825.11/ENSG00000105227.14, exon 5 of 6)	19
CYP4V2	1.52	0.000618	0.028	ENSG00000145476.15	ENST00000378802.4	0	CPG_ov	186190929	186191929	5.33	Promoter (<=1kb)	4
CXorf40A	1.52	0.000627	0.0281	ENSG00000197620.10	ENST00000431132.6	0	CPG_ov	149540226	149541226	5.37	Promoter (<=1kb)	23
PARP9	1.52	0.000694	0.0292	ENSG00000138496.16	ENST00000477522.6	0	CPG_ov	122563842	122564842	6.84	Promoter (<=1kb)	3
ZHX1	1.52	0.000714	0.0295	ENSG00000165156.14	ENST00000297857.3	0	CPG_ov	123274228	123275228	7.78	Promoter (<=1kb)	8
ATP6V1H	1.52	0.000725	0.0297	ENSG00000047249.16	ENST00000355221.7	0	CPG_ov	53842901	53843901	5.9	Promoter (<=1kb)	8
FRAT1	1.52	0.000791	0.0308	ENSG00000165879.8	ENST00000371021.4	0	CPG_ov	97318883	97319883	5.74	Promoter (<=1kb)	10
MEAF6	1.52	0.000888	0.0324	ENSG00000163875.15	ENST00000373075.6	0	CPG_ov	37514287	37515287	5.56	Promoter (<=1kb)	1
STK35	1.52	0.000894	0.0324	ENSG00000125834.12	ENST00000493263.1	0	CPG_ov	2102251	2103251	6.23	Promoter (<=1kb)	20
KLHL5	1.52	0.000987	0.0339	ENSG00000109790.16	ENST00000261425.7	0	CPG_ov	39044341	39045341	6.7	Promoter (<=1kb)	4
SRSF4	1.52	0.00111	0.0355	ENSG00000116350.16	ENST00000373795.6	0	CPG_ov	29181155	29182155	6.84	Promoter (<=1kb)	1
KDELR1	1.52	0.0012	0.0366	ENSG00000105438.8	ENST00000330720.6	0	no_CPG	48391067	48392067	6.03	Promoter (<=1kb)	19
WDR90	1.52	0.00121	0.0368	ENSG00000161996.18	ENST00000552943.5	0	CPG_ov	648800	649800	5.65	Promoter (<=1kb)	16
REL	1.52	0.00122	0.0368	ENSG00000162924.13	ENST00000295025.12	0	CPG_ov	60881122	60882122	7.16	Promoter (<=1kb)	2
CYB5R3	1.52	0.00129	0.0374	ENSG00000100243.20	ENST00000352397.9	0	CPG_ov	42648842	42649842	5.04	Promoter (<=1kb)	22
SEC14L1	1.52	0.00146	0.0391	ENSG00000129657.14	ENST00000588880.5	0	CPG_ov	77140308	77141308	7.02	Promoter (<=1kb)	17
SND1	1.52	0.00147	0.0391	ENSG00000197157.10	ENST00000485871.1	46164	CPG_ov	128135653	128136653	5.41	Distal Intergenic	7
PIGX	1.52	0.00152	0.0397	ENSG00000163964.13	ENST00000392391.7	0	CPG_ov	196711604	196712604	6.42	Promoter (<=1kb)	3
PRKACB	1.52	0.00155	0.0399	ENSG00000142875.19	ENST00000370689.6	0	CPG_ov	84077384	84078384	6.85	Promoter (<=1kb)	1
CLK3	1.52	0.00157	0.0402	ENSG00000179335.18	ENST00000454830.6	0	CPG_ov	74615061	74616061	6.34	Promoter (<=1kb)	15
PCDH1	1.52	0.0017	0.0416	ENSG00000156453.13	ENST00000511044.1	15486	CPG_ov	141849716	141850716	6.03	Downstream (2-3kb)	5
ARHGDIA	1.52	0.00182	0.0429	ENSG00000141522.11	ENST00000583791.1	0	CPG_ov	81868765	81869765	6.38	Promoter (<=1kb)	17
SLC11A2	1.52	0.0019	0.0436	ENSG00000110911.14	ENST00000262051.11	0	CPG_ov	51026010	51027010	6.83	Promoter (<=1kb)	12
DCUN1D4	1.52	0.00216	0.0459	ENSG00000109184.14	ENST00000504113.5	0	CPG_ov	51843123	51844123	7.15	Promoter (<=1kb)	4
ARHGAP5	1.52	0.00226	0.0466	ENSG00000100852.12	ENST00000556611.5	0	CPG_ov	32076228	32077228	7.02	Promoter (<=1kb)	14
TMEM134	1.52	0.00244	0.0481	ENSG00000172663.8	ENST00000308022.6	0	CPG_ov	67468610	67469610	6.19	Promoter (<=1kb)	11
KDM6B	1.52	0.00247	0.0483	ENSG00000132510.10	ENST00000575521.1	-974	CPG_ov	7842233	7843233	5.59	Promoter (<=1kb)	17
MACF1	1.52	0.00249	0.0485	ENSG00000127603.23	ENST00000530275.2	0	CPG_ov	39408324	39409324	6.82	Promoter (<=1kb)	1
ALOXE3	1.51	8.46e-05	0.0111	ENSG00000179148.9	ENST00000318227.3	-1608	CPG_ov	8120655	8121655	5.85	Promoter (1-2kb)	17
SMAD6	1.51	0.000257	0.0195	ENSG00000137834.14	ENST00000288840.9	0	CPG_ov	66701549	66702549	7.71	Promoter (<=1kb)	15
SLC27A1	1.51	0.000364	0.0228	ENSG00000130304.16	ENST00000252595.11	0	CPG_ov	17469600	17470600	7.17	Promoter (<=1kb)	19
YDJC	1.51	0.000388	0.0236	ENSG00000161179.13	ENST00000464015.5	0	CPG_ov	21629399	21630399	6.88	Promoter (<=1kb)	22
NECTIN2	1.51	0.000396	0.0238	ENSG00000130202.9	ENST00000252485.8	0	CPG_ov	44845759	44846759	6.49	Promoter (<=1kb)	19
SLC48A1	1.51	0.000569	0.0271	ENSG00000211584.13	ENST00000442218.2	0	CPG_ov	47773087	47774087	5.25	Promoter (<=1kb)	12
SCRT1	1.51	0.000657	0.0289	ENSG00000261678.2	ENST00000569446.2	3789	CPG_ov	144331492	144332492	7.08	3' UTR	8
MAFG	1.51	0.000673	0.029	ENSG00000197063.10	ENST00000357736.8	0	CPG_ov	81927450	81928450	6.33	Promoter (<=1kb)	17
PRSS38	1.51	0.000693	0.0292	ENSG00000185888.5	ENST00000366757.3	-27083	CPG_ov	227787610	227788610	6.8	Distal Intergenic	1
CS	1.51	0.000754	0.0301	ENSG00000062485.18	ENST00000549143.5	0	CPG_ov	56299910	56300910	7.38	Promoter (<=1kb)	12
RELL1	1.51	0.000776	0.0305	ENSG00000181826.9	ENST00000314117.8	0	CPG_ov	37686250	37687250	7.52	Promoter (<=1kb)	4
UAP1	1.51	0.000813	0.0313	ENSG00000117143.13	ENST00000271469.7	0	CPG_ov	162560993	162561993	7.23	Promoter (<=1kb)	1
WNK1	1.51	0.000832	0.0316	ENSG00000060237.16	ENST00000535572.5	0	CPG_ov	751933	752933	7.87	Promoter (<=1kb)	12
HOXB9	1.51	0.000846	0.0316	ENSG00000170689.9	ENST00000311177.6	0	CPG_ov	48626210	48627210	6.63	Promoter (<=1kb)	17
WDR1	1.51	0.00118	0.0364	ENSG00000071127.16	ENST00000499869.6	0	CPG_ov	10116506	10117506	6.74	Promoter (<=1kb)	4
CD47	1.51	0.00134	0.0379	ENSG00000196776.14	ENST00000355354.11	0	CPG_ov	108090272	108091272	6.19	Promoter (<=1kb)	3
IMPA2	1.51	0.00136	0.0381	ENSG00000141401.11	ENST00000588752.5	0	CPG_ov	11980640	11981640	7.55	Promoter (<=1kb)	18
UTP4	1.51	0.00144	0.0387	ENSG00000141076.17	ENST00000314423.11	0	CPG_ov	69132235	69133235	5.71	Promoter (<=1kb)	16
EPC2	1.51	0.00146	0.0391	ENSG00000135999.11	ENST00000258484.10	0	CPG_ov	148644619	148645619	8.01	Promoter (<=1kb)	2
CHRAC1	1.51	0.0015	0.0394	ENSG00000104472.9	ENST00000220913.9	0	CPG_ov	140511107	140512107	7.88	Promoter (<=1kb)	8
GNG12	1.51	0.00169	0.0416	ENSG00000172380.5	ENST00000370982.3	0	CPG_ov	67832730	67833730	6.8	Promoter (<=1kb)	1
TADA3	1.51	0.00176	0.0422	ENSG00000171148.13	ENST00000301964.6	0	CPG_ov	9792130	9793130	7.08	Promoter (<=1kb)	3
BCL7B	1.51	0.00177	0.0423	ENSG00000106635.7	ENST00000411832.5	0	CPG_ov	73556708	73557708	6.35	Promoter (<=1kb)	7
CLIP1	1.51	0.0019	0.0436	ENSG00000130779.19	ENST00000361654.8	0	CPG_ov	122421763	122422763	6.03	Promoter (<=1kb)	12
REEP3	1.51	0.00224	0.0464	ENSG00000165476.13	ENST00000373758.4	0	CPG_ov	63520941	63521941	6.82	Promoter (<=1kb)	10
KLHL22	1.51	0.00225	0.0465	ENSG00000099910.16	ENST00000328879.8	0	CPG_ov	20495567	20496567	7.11	Promoter (<=1kb)	22
RPL17P43	1.51	0.0023	0.047	ENSG00000228331.2	ENST00000422360.2	10524	CPG_ov	19507467	19508467	6.41	Intron (ENST00000584348.5/ENSG00000142494.13, intron 1 of 6)	17
FOXJ3	1.51	0.0024	0.0478	ENSG00000198815.8	ENST00000372572.5	0	CPG_ov	42334667	42335667	6.82	Promoter (<=1kb)	1
ZFP36L2	1.51	0.00248	0.0484	ENSG00000152518.7	ENST00000282388.3	0	CPG_ov	43226257	43227257	7.59	Promoter (<=1kb)	2
RP11-810H18.1	1.51	0.00253	0.0487	ENSG00000225011.4	ENST00000515851.1	30331	no_CPG	29465562	29466562	4.12	Distal Intergenic	1
RP11-351M16.4	1.5	0.000325	0.0217	ENSG00000282996.1	ENST00000634334.1	0	CPG_ov	28302640	28303640	7.41	Promoter (<=1kb)	10
SEH1L	1.5	0.000388	0.0236	ENSG00000085415.15	ENST00000262124.15	0	CPG_ov	12947665	12948665	7.89	Promoter (<=1kb)	18
MFSD14B	1.5	0.00065	0.0287	ENSG00000148110.15	ENST00000375344.7	0	CPG_ov	94373976	94374976	5.94	Promoter (<=1kb)	9
FAM168A	1.5	0.000667	0.029	ENSG00000054965.10	ENST00000064778.8	0	CPG_ov	73597892	73598892	7.6	Promoter (<=1kb)	11
CTC-338M12.4	1.5	0.000767	0.0305	ENSG00000233937.6	ENST00000511331.5	0	CPG_ov	181246079	181247079	6.26	Promoter (<=1kb)	5
ANKRD10	1.5	0.000788	0.0308	ENSG00000088448.14	ENST00000267339.6	0	CPG_ov	110914944	110915944	6.81	Promoter (<=1kb)	13
AC114808.3	1.5	0.00096	0.0334	ENSG00000235403.1	ENST00000437132.1	11530	CPG_ov	1055811	1056811	4.08	Intron (ENST00000452177.5/ENSG00000172554.11, intron 1 of 7)	2
CAPN5	1.5	0.000987	0.0339	ENSG00000149260.15	ENST00000531028.1	0	CPG_ov	77066131	77067131	6.38	Promoter (<=1kb)	11
OSBPL10	1.5	0.00109	0.0353	ENSG00000144645.13	ENST00000396556.6	0	CPG_ov	31980932	31981932	7.02	Promoter (<=1kb)	3
RP11-492E3.2	1.5	0.00115	0.0359	ENSG00000227619.1	ENST00000443993.1	-6076	CPG_ov	129568333	129569333	5.46	Distal Intergenic	9
PHF23	1.5	0.00134	0.038	ENSG00000040633.12	ENST00000320316.7	0	CPG_ov	7239222	7240222	6.73	Promoter (<=1kb)	17
NSUN2	1.5	0.00138	0.0383	ENSG00000037474.14	ENST00000264670.10	0	CPG_ov	6632953	6633953	6.64	Promoter (<=1kb)	5
C19orf45	1.5	0.00141	0.0386	ENSG00000198723.10	ENST00000601292.1	0	no_CPG	7505891	7506891	4.25	Promoter (<=1kb)	19
PLIN3	1.5	0.00148	0.0393	ENSG00000105355.8	ENST00000221957.8	0	no_CPG	4867315	4868315	5.76	Promoter (<=1kb)	19
FOCAD	1.5	0.00165	0.0411	ENSG00000188352.12	ENST00000604036.1	0	CPG_ov	20683778	20684778	6.27	Promoter (<=1kb)	9
RP6-65G23.5	1.5	0.00167	0.0414	ENSG00000275630.1	ENST00000622856.1	0	CPG_ov	70821468	70822468	6.51	Promoter (<=1kb)	14
FER	1.5	0.00182	0.0429	ENSG00000151422.12	ENST00000513676.5	0	CPG_ov	108748329	108749329	8.18	Promoter (<=1kb)	5
SKIL	1.5	0.00185	0.0429	ENSG00000136603.13	ENST00000477216.1	0	CPG_ov	170356839	170357839	6.36	Promoter (<=1kb)	3
CYP1A1	1.5	0.00185	0.043	ENSG00000140465.13	ENST00000379727.7	-218	CPG_ov	74725828	74726828	5.39	Promoter (<=1kb)	15
FKBP5	1.5	0.00192	0.0437	ENSG00000096060.14	ENST00000536438.5	-2552	CPG_ov	35731135	35732135	7.22	Promoter (2-3kb)	6
AC010729.1	1.5	0.00198	0.0444	ENSG00000242540.2	ENST00000455579.2	0	CPG_ov	5696181	5697181	5.99	Promoter (<=1kb)	2
TALDO1	1.5	0.00202	0.0448	ENSG00000177156.10	ENST00000319006.7	0	CPG_ov	746753	747753	5.18	Promoter (<=1kb)	11
NELFA	1.5	0.00202	0.0448	ENSG00000185049.13	ENST00000455762.5	0	CPG_ov	2041288	2042288	4.95	Promoter (<=1kb)	4
CCT6P3	1.5	0.00211	0.0454	ENSG00000234585.6	ENST00000419314.5	0	CPG_ov	65037556	65038556	5.94	Promoter (<=1kb)	7
ARL6IP6	1.5	0.00214	0.0458	ENSG00000177917.10	ENST00000495469.5	0	CPG_ov	152717246	152718246	8.15	Promoter (<=1kb)	2
WDFY3	1.5	0.0023	0.047	ENSG00000163625.15	ENST00000295888.8	0	CPG_ov	84965959	84966959	6.63	Promoter (<=1kb)	4
RTN2	1.5	0.0024	0.0478	ENSG00000125744.11	ENST00000245923.8	0	CPG_ov	45496570	45497570	5.67	Promoter (<=1kb)	19
RP11-444D3.1	1.5	0.00251	0.0486	ENSG00000255864.5	ENST00000446891.6	0	CPG_ov	24561531	24562531	6.45	Promoter (<=1kb)	12
GS1-24F4.2	1.5	0.00254	0.0488	ENSG00000245857.2	ENST00000500823.2	0	CPG_ov	6834975	6835975	5.75	Promoter (<=1kb)	8
CELF5	1.5	0.00264	0.0499	ENSG00000161082.12	ENST00000591483.1	0	no_CPG	3284614	3285614	4.94	Promoter (<=1kb)	19
FYTTD1	1.49	0.00013	0.0137	ENSG00000122068.12	ENST00000428738.5	0	CPG_ov	197736418	197737418	6.98	Promoter (<=1kb)	3
MPPED2	1.49	0.000234	0.0185	ENSG00000066382.16	ENST00000448418.6	329	CPG_ov	30584952	30585952	6.13	Promoter (<=1kb)	11
CYP26B1	1.49	0.000434	0.0249	ENSG00000003137.8	ENST00000412253.1	5037	no_CPG	72137047	72138047	5.86	Intron (ENST00000546307.5/ENSG00000003137.8, intron 1 of 4)	2
LIMS1	1.49	0.000507	0.0258	ENSG00000169756.16	ENST00000544547.5	0	CPG_ov	108533667	108534667	7.02	Promoter (<=1kb)	2
LNX2	1.49	0.00069	0.0292	ENSG00000139517.7	ENST00000316334.4	0	CPG_ov	27620230	27621230	6.21	Promoter (<=1kb)	13
PDSS1	1.49	0.000753	0.0301	ENSG00000148459.15	ENST00000376215.9	0	CPG_ov	26696998	26697998	5.49	Promoter (<=1kb)	10
TREX2	1.49	0.000868	0.032	ENSG00000183479.12	ENST00000330912.6	0	CPG_ov	153470227	153471227	5.83	Promoter (<=1kb)	23
EFNA3	1.49	0.000925	0.0327	ENSG00000143590.13	ENST00000470294.5	0	CPG_ov	155084593	155085593	7.47	Promoter (<=1kb)	1
COMT	1.49	0.001	0.0342	ENSG00000093010.12	ENST00000361682.10	0	CPG_ov	19941411	19942411	5.46	Promoter (<=1kb)	22
OSBPL2	1.49	0.00101	0.0345	ENSG00000130703.15	ENST00000615516.1	-3227	no_CPG	62227695	62228695	5.58	Distal Intergenic	20
ZBTB7C	1.49	0.00129	0.0374	ENSG00000184828.9	ENST00000588149.5	0	CPG_ov	48409833	48410833	5.92	Promoter (<=1kb)	18
MPHOSPH8	1.49	0.00129	0.0375	ENSG00000196199.13	ENST00000361479.9	0	CPG_ov	19633036	19634036	6.21	Promoter (<=1kb)	13
AP000662.4	1.49	0.00134	0.0379	ENSG00000254602.1	ENST00000530595.1	0	no_CPG	57638265	57639265	5.53	Promoter (<=1kb)	11
ZNF536	1.49	0.00141	0.0386	ENSG00000198597.8	ENST00000590564.5	0	CPG_ov	30227455	30228455	6.14	Promoter (<=1kb)	19
THBS3	1.49	0.00166	0.0411	ENSG00000169231.13	ENST00000486260.5	0	CPG_ov	155208546	155209546	6.93	Promoter (<=1kb)	1
DENND4C	1.49	0.00186	0.0431	ENSG00000137145.20	ENST00000434457.6	0	CPG_ov	19229874	19230874	6.36	Promoter (<=1kb)	9
DYRK3	1.49	0.00202	0.0448	ENSG00000143479.15	ENST00000367109.6	0	CPG_ov	206634981	206635981	6.74	Promoter (<=1kb)	1
ENO2	1.49	0.00218	0.0459	ENSG00000111674.8	ENST00000541477.5	0	CPG_ov	6913922	6914922	6.27	Promoter (<=1kb)	12
LRRC23	1.49	0.00219	0.046	ENSG00000010626.14	ENST00000433346.5	0	CPG_ov	6873034	6874034	7.12	Promoter (<=1kb)	12
EFNA3	1.49	0.00221	0.0461	ENSG00000143590.13	ENST00000368408.3	0	CPG_ov	155078806	155079806	5.49	Promoter (<=1kb)	1
SERPINB8	1.49	0.00222	0.0463	ENSG00000166401.14	ENST00000397985.6	0	CPG_ov	63969912	63970912	6.57	Promoter (<=1kb)	18
EMD	1.48	0.000282	0.0206	ENSG00000102119.10	ENST00000369842.8	0	CPG_ov	154378485	154379485	6.83	Promoter (<=1kb)	23
RP11-84A19.3	1.48	0.000309	0.0213	ENSG00000254545.1	ENST00000527035.1	0	CPG_ov	31788615	31789615	6.51	Promoter (<=1kb)	1
NRN1	1.48	0.000471	0.0254	ENSG00000124785.8	ENST00000616243.1	-701	CPG_ov	6008306	6009306	5.66	Promoter (<=1kb)	6
ARL2BP	1.48	0.000605	0.0278	ENSG00000102931.7	ENST00000219204.7	0	CPG_ov	57244867	57245867	6.46	Promoter (<=1kb)	16
DNAJC7	1.48	0.000656	0.0289	ENSG00000168259.14	ENST00000457167.8	0	CPG_ov	42017128	42018128	6.96	Promoter (<=1kb)	17
AAK1	1.48	0.000657	0.0289	ENSG00000115977.18	ENST00000409068.5	0	CPG_ov	69643420	69644420	6.62	Promoter (<=1kb)	2
AC074391.1	1.48	0.000912	0.0326	ENSG00000204929.12	ENST00000606978.5	0	CPG_ov	65436036	65437036	6.84	Promoter (<=1kb)	2
GSE1	1.48	0.001	0.0342	ENSG00000131149.18	ENST00000411612.5	-336	CPG_ov	85611821	85612821	7.33	Promoter (<=1kb)	16
CERS4	1.48	0.00103	0.0347	ENSG00000090661.11	ENST00000557925.1	2234	no_CPG	8252760	8253760	4.37	Promoter (2-3kb)	19
ZNF131	1.48	0.0013	0.0377	ENSG00000172262.11	ENST00000509156.5	0	CPG_ov	43120982	43121982	7.87	Promoter (<=1kb)	5
UFSP1	1.48	0.00131	0.0378	ENSG00000176125.4	ENST00000388761.3	0	CPG_ov	100889292	100890292	7.42	Promoter (<=1kb)	7
SLC22A4	1.48	0.00142	0.0386	ENSG00000197208.5	ENST00000200652.3	0	CPG_ov	132293622	132294622	7.41	Promoter (<=1kb)	5
THUMPD3-AS1	1.48	0.0016	0.0405	ENSG00000206573.8	ENST00000468186.5	0	CPG_ov	9396511	9397511	8.1	Promoter (<=1kb)	3
PIAS4	1.48	0.0016	0.0405	ENSG00000105229.6	ENST00000262971.2	0	CPG_ov	4006984	4007984	6.39	Promoter (<=1kb)	19
GNPDA1	1.48	0.00171	0.0416	ENSG00000113552.15	ENST00000513454.5	0	CPG_ov	142012259	142013259	5.34	Promoter (<=1kb)	5
RPL32P28	1.48	0.00176	0.0422	ENSG00000232105.1	ENST00000443577.1	29776	no_CPG	62357764	62358764	3.61	Distal Intergenic	13
ESYT2	1.48	0.0018	0.0427	ENSG00000117868.15	ENST00000251527.9	0	CPG_ov	158829228	158830228	5.34	Promoter (<=1kb)	7
PTH1R	1.48	0.0019	0.0436	ENSG00000160801.13	ENST00000313049.9	-31	CPG_ov	46882326	46883326	4.68	Promoter (<=1kb)	3
HDLBP	1.48	0.00194	0.044	ENSG00000115677.16	ENST00000391976.6	0	CPG_ov	241315024	241316024	7.19	Promoter (<=1kb)	2
RP11-147L13.15	1.48	0.00198	0.0444	ENSG00000274712.1	ENST00000614046.1	0	CPG_ov	68205098	68206098	6.64	Promoter (<=1kb)	17
AVL9	1.48	0.00199	0.0445	ENSG00000105778.17	ENST00000485228.1	0	CPG_ov	32495053	32496053	6.94	Promoter (<=1kb)	7
TRAPPC10	1.48	0.00201	0.0447	ENSG00000160218.12	ENST00000380221.7	0	CPG_ov	44011854	44012854	4.62	Promoter (<=1kb)	21
FCHSD2	1.48	0.00204	0.0448	ENSG00000137478.14	ENST00000311172.11	0	CPG_ov	73141857	73142857	6.81	Promoter (<=1kb)	11
TMEM51	1.48	0.00211	0.0454	ENSG00000171729.13	ENST00000400796.7	-27	CPG_ov	15152706	15153706	6.05	Promoter (<=1kb)	1
LACTB	1.48	0.00211	0.0454	ENSG00000103642.11	ENST00000557972.1	0	CPG_ov	63121936	63122936	6.74	Promoter (<=1kb)	15
ADAM23	1.48	0.00243	0.0479	ENSG00000114948.12	ENST00000264377.7	0	CPG_ov	206443389	206444389	4.75	Promoter (<=1kb)	2
LINC00612	1.48	0.00247	0.0484	ENSG00000214851.4	ENST00000538094.1	0	CPG_ov	9064345	9065345	6.29	Promoter (<=1kb)	12
GDPGP1	1.48	0.00263	0.0498	ENSG00000183208.12	ENST00000558017.5	0	CPG_ov	90233636	90234636	6.8	Promoter (<=1kb)	15
SLAIN2	1.47	0.000442	0.0251	ENSG00000109171.14	ENST00000264313.10	0	CPG_ov	48340860	48341860	7.57	Promoter (<=1kb)	4
TPT1	1.47	0.000587	0.0274	ENSG00000133112.16	ENST00000616577.4	0	CPG_ov	45340790	45341790	7.24	Promoter (<=1kb)	13
ZMYM5	1.47	0.000843	0.0316	ENSG00000132950.18	ENST00000535942.5	0	CPG_ov	19863353	19864353	6.86	Promoter (<=1kb)	13
GMPS	1.47	0.000891	0.0324	ENSG00000163655.15	ENST00000496455.6	0	CPG_ov	155870037	155871037	5.55	Promoter (<=1kb)	3
RP11-560J1.2	1.47	0.00108	0.0353	ENSG00000271888.1	ENST00000607711.1	-6	CPG_ov	15245006	15246006	7.53	Promoter (<=1kb)	6
HDAC4	1.47	0.00132	0.0378	ENSG00000068024.16	ENST00000345617.7	0	CPG_ov	239400712	239401712	7.31	Promoter (<=1kb)	2
PPARGC1B	1.47	0.00133	0.0379	ENSG00000155846.16	ENST00000309241.9	638	CPG_ov	149730949	149731949	6.18	Promoter (<=1kb)	5
KRAS	1.47	0.00134	0.0379	ENSG00000133703.11	ENST00000311936.7	0	CPG_ov	25250650	25251650	7.04	Promoter (<=1kb)	12
C9orf16	1.47	0.00134	0.0379	ENSG00000171159.4	ENST00000372994.1	0	CPG_ov	128159451	128160451	6.12	Promoter (<=1kb)	9
CREB1	1.47	0.00149	0.0394	ENSG00000118260.14	ENST00000430624.5	0	CPG_ov	207529648	207530648	6.72	Promoter (<=1kb)	2
ADIRF-AS1	1.47	0.00151	0.0395	ENSG00000272734.1	ENST00000418273.2	0	CPG_ov	86971089	86972089	6.76	Promoter (<=1kb)	10
RP11-244H3.1	1.47	0.00152	0.0397	ENSG00000241014.1	ENST00000417456.1	0	CPG_ov	34984313	34985313	5.58	Promoter (<=1kb)	1
IGF2R	1.47	0.00152	0.0397	ENSG00000197081.12	ENST00000356956.5	0	CPG_ov	159968373	159969373	5.45	Promoter (<=1kb)	6
YEATS2	1.47	0.00179	0.0424	ENSG00000163872.15	ENST00000305135.9	0	CPG_ov	183697551	183698551	5.41	Promoter (<=1kb)	3
CBX7	1.47	0.00194	0.044	ENSG00000100307.12	ENST00000475962.5	3620	CPG_ov	39145212	39146212	5.29	Intron (ENST00000475962.5/ENSG00000100307.12, intron 1 of 1)	22
NME2	1.47	0.00232	0.0472	ENSG00000243678.11	ENST00000393190.4	0	CPG_ov	51166546	51167546	5.85	Promoter (<=1kb)	17
PURA	1.47	0.00238	0.0478	ENSG00000185129.5	ENST00000331327.4	0	CPG_ov	140113444	140114444	6.12	Promoter (<=1kb)	5
TET3	1.47	0.0024	0.0479	ENSG00000187605.15	ENST00000305799.8	0	CPG_ov	74002458	74003458	6.46	Promoter (<=1kb)	2
HOXA4	1.47	0.00257	0.0491	ENSG00000197576.13	ENST00000610970.1	0	CPG_ov	27130311	27131311	5.62	Promoter (<=1kb)	7
FBXL17	1.47	0.00263	0.0498	ENSG00000145743.15	ENST00000359660.9	0	CPG_ov	108381158	108382158	7.02	Promoter (<=1kb)	5
ARVCF	1.46	8.52e-05	0.0111	ENSG00000099889.13	ENST00000401994.5	279	CPG_ov	19985814	19986814	6.32	Promoter (<=1kb)	22
C10orf67	1.46	0.000124	0.0135	ENSG00000179133.12	ENST00000636213.1	0	CPG_ov	23343953	23344953	5.2	Promoter (<=1kb)	10
FAM86HP	1.46	0.000272	0.0202	ENSG00000253540.5	ENST00000513466.5	0	CPG_ov	130111281	130112281	7.13	Promoter (<=1kb)	3
PPA1	1.46	0.000309	0.0213	ENSG00000180817.11	ENST00000373232.7	0	CPG_ov	70233016	70234016	7.32	Promoter (<=1kb)	10
HIVEP3	1.46	0.000326	0.0217	ENSG00000127124.14	ENST00000372583.5	17200	no_CPG	41900298	41901298	5.64	Intron (ENST00000372583.5/ENSG00000127124.14, intron 1 of 8)	1
IDH1	1.46	0.000346	0.0224	ENSG00000138413.13	ENST00000446179.5	0	CPG_ov	208254053	208255053	6.49	Promoter (<=1kb)	2
NDUFAF6	1.46	0.000421	0.0246	ENSG00000156170.12	ENST00000523378.5	0	CPG_ov	94895115	94896115	5.94	Promoter (<=1kb)	8
RAB3A	1.46	0.000469	0.0253	ENSG00000105649.9	ENST00000222256.8	0	CPG_ov	18203737	18204737	7.24	Promoter (<=1kb)	19
TBC1D20	1.46	0.000491	0.0257	ENSG00000125875.13	ENST00000461304.5	0	CPG_ov	461968	462968	5.52	Promoter (<=1kb)	20
ADI1	1.46	0.000507	0.0258	ENSG00000182551.13	ENST00000327435.10	0	CPG_ov	3518905	3519905	6.83	Promoter (<=1kb)	2
IMPDH1	1.46	0.000538	0.0266	ENSG00000106348.16	ENST00000419067.6	0	CPG_ov	128409528	128410528	5.78	Promoter (<=1kb)	7
CEP164	1.46	0.000575	0.0272	ENSG00000110274.14	ENST00000533153.5	0	CPG_ov	117327385	117328385	6.26	Promoter (<=1kb)	11
QDPR	1.46	0.000593	0.0275	ENSG00000151552.11	ENST00000513615.5	0	CPG_ov	17511510	17512510	5.17	Promoter (<=1kb)	4
NCOR1	1.46	0.000672	0.029	ENSG00000141027.20	ENST00000268712.7	0	CPG_ov	16215140	16216140	5.86	Promoter (<=1kb)	17
TRMT1	1.46	0.000675	0.029	ENSG00000104907.12	ENST00000592062.5	0	CPG_ov	13117136	13118136	4.76	Promoter (<=1kb)	19
FTH1	1.46	0.000795	0.0309	ENSG00000167996.15	ENST00000529191.5	0	CPG_ov	61967213	61968213	6.57	Promoter (<=1kb)	11
HMG20B	1.46	0.000798	0.0309	ENSG00000064961.18	ENST00000416526.5	0	CPG_ov	3572167	3573167	6.93	Promoter (<=1kb)	19
ROGDI	1.46	0.00103	0.0347	ENSG00000067836.12	ENST00000322048.11	0	CPG_ov	4802388	4803388	6.3	Promoter (<=1kb)	16
TRAPPC8	1.46	0.00122	0.0368	ENSG00000153339.13	ENST00000283351.8	0	CPG_ov	31942579	31943579	6.59	Promoter (<=1kb)	18
GDI2	1.46	0.00133	0.0379	ENSG00000057608.16	ENST00000380191.8	0	CPG_ov	5812971	5813971	6.85	Promoter (<=1kb)	10
ARHGAP21	1.46	0.00138	0.0383	ENSG00000107863.17	ENST00000612832.4	-89	CPG_ov	24723757	24724757	7.4	Promoter (<=1kb)	10
SNX29	1.46	0.00138	0.0384	ENSG00000048471.13	ENST00000569801.5	0	CPG_ov	11976263	11977263	5.34	Promoter (<=1kb)	16
PHKA2	1.46	0.00146	0.0391	ENSG00000044446.11	ENST00000379942.4	0	CPG_ov	18984301	18985301	5.95	Promoter (<=1kb)	23
DNAJB14	1.46	0.0017	0.0416	ENSG00000164031.16	ENST00000442697.6	0	CPG_ov	99946088	99947088	6.26	Promoter (<=1kb)	4
HDAC7	1.46	0.00179	0.0425	ENSG00000061273.17	ENST00000427332.6	0	CPG_ov	47820096	47821096	6.74	Promoter (<=1kb)	12
C1orf123	1.46	0.00183	0.0429	ENSG00000162384.13	ENST00000294360.4	0	CPG_ov	53219979	53220979	6.72	Promoter (<=1kb)	1
ADGRB3	1.46	0.0019	0.0436	ENSG00000135298.13	ENST00000370598.5	0	CPG_ov	68634590	68635590	6.64	Promoter (<=1kb)	6
PRKAA1	1.46	0.002	0.0446	ENSG00000132356.11	ENST00000397128.6	0	CPG_ov	40797626	40798626	7.13	Promoter (<=1kb)	5
CAP2	1.46	0.00221	0.0461	ENSG00000112186.11	ENST00000229922.6	0	no_CPG	17393208	17394208	6.11	Promoter (<=1kb)	6
PIAS1	1.46	0.00234	0.0474	ENSG00000033800.13	ENST00000249636.10	0	CPG_ov	68053780	68054780	6.9	Promoter (<=1kb)	15
SMG1P3	1.46	0.00239	0.0478	ENSG00000180747.15	ENST00000522841.6	0	CPG_ov	21519918	21520918	5.44	Promoter (<=1kb)	16
FAM78B	1.46	0.00248	0.0484	ENSG00000188859.6	ENST00000354422.3	0	CPG_ov	166166657	166167657	6.64	Promoter (<=1kb)	1
ZNF865	1.45	0.000156	0.0152	ENSG00000261221.3	ENST00000568956.1	0	CPG_ov	55604929	55605929	6.42	Promoter (<=1kb)	19
ARFGAP3	1.45	0.000227	0.0183	ENSG00000242247.10	ENST00000263245.9	0	CPG_ov	42856691	42857691	6.16	Promoter (<=1kb)	22
EIF3J	1.45	0.000261	0.0197	ENSG00000104131.12	ENST00000261868.9	0	CPG_ov	44536189	44537189	7.03	Promoter (<=1kb)	15
UBE4B	1.45	0.000299	0.0209	ENSG00000130939.18	ENST00000253251.12	0	CPG_ov	10032553	10033553	7.52	Promoter (<=1kb)	1
TRIM44	1.45	0.000462	0.0253	ENSG00000166326.6	ENST00000299413.6	0	CPG_ov	35662360	35663360	6.28	Promoter (<=1kb)	11
AJ011932.1	1.45	0.000721	0.0296	ENSG00000274248.1	ENST00000621707.1	0	CPG_ov	45973727	45974727	6.34	Promoter (<=1kb)	21
ETV3	1.45	0.000775	0.0305	ENSG00000117036.11	ENST00000368192.8	0	CPG_ov	157138201	157139201	6.17	Promoter (<=1kb)	1
TMEM263	1.45	0.000884	0.0323	ENSG00000151135.9	ENST00000548125.5	0	CPG_ov	106955371	106956371	6.56	Promoter (<=1kb)	12
EML6	1.45	0.00103	0.0347	ENSG00000214595.11	ENST00000496970.1	0	CPG_ov	54723101	54724101	7.43	Promoter (<=1kb)	2
PITRM1	1.45	0.00104	0.0349	ENSG00000107959.15	ENST00000224949.8	0	CPG_ov	3172419	3173419	5.86	Promoter (<=1kb)	10
PEPD	1.45	0.00117	0.0361	ENSG00000124299.13	ENST00000244137.11	0	CPG_ov	33521394	33522394	5.85	Promoter (<=1kb)	19
FAM105A	1.45	0.00118	0.0364	ENSG00000145569.5	ENST00000274217.3	0	CPG_ov	14581612	14582612	6.76	Promoter (<=1kb)	5
SMAP2	1.45	0.00125	0.0371	ENSG00000084070.11	ENST00000372718.7	0	CPG_ov	40373233	40374233	6.85	Promoter (<=1kb)	1
ZMYND19	1.45	0.00127	0.0373	ENSG00000165724.5	ENST00000298585.2	0	CPG_ov	137590160	137591160	5.86	Promoter (<=1kb)	9
SLC35C1	1.45	0.00133	0.0379	ENSG00000181830.8	ENST00000530471.1	0	CPG_ov	45804712	45805712	6.46	Promoter (<=1kb)	11
KPNA1	1.45	0.00174	0.042	ENSG00000114030.12	ENST00000344337.10	0	CPG_ov	122514337	122515337	6.84	Promoter (<=1kb)	3
PNPLA3	1.45	0.00184	0.0429	ENSG00000100344.10	ENST00000216180.7	0	CPG_ov	43923452	43924452	6.6	Promoter (<=1kb)	22
SPG20-AS1	1.45	0.00186	0.0431	ENSG00000120664.10	ENST00000488319.5	0	CPG_ov	36346057	36347057	6.1	Promoter (<=1kb)	13
CMC4	1.45	0.00189	0.0436	ENSG00000182712.15	ENST00000369484.7	0	CPG_ov	155071227	155072227	5.36	Promoter (<=1kb)	23
ECI2	1.45	0.00212	0.0455	ENSG00000198721.12	ENST00000380118.7	0	CPG_ov	4135460	4136460	6.26	Promoter (<=1kb)	6
C6orf106	1.45	0.00248	0.0484	ENSG00000196821.9	ENST00000374023.7	0	CPG_ov	34696183	34697183	6.66	Promoter (<=1kb)	6
KIF3C	1.45	0.00249	0.0485	ENSG00000084731.14	ENST00000264712.7	0	CPG_ov	25981955	25982955	6.39	Promoter (<=1kb)	2
SMAD7	1.45	0.00252	0.0487	ENSG00000101665.8	ENST00000262158.6	-1218	CPG_ov	48951929	48952929	6.45	Promoter (1-2kb)	18
SCN1B	1.45	0.00253	0.0487	ENSG00000105711.10	ENST00000262631.9	0	CPG_ov	35029949	35030949	4.97	Promoter (<=1kb)	19
TPK1	1.44	7.34e-05	0.0103	ENSG00000196511.13	ENST00000360057.7	0	CPG_ov	144835485	144836485	6.29	Promoter (<=1kb)	7
GSTO1	1.44	0.000275	0.0202	ENSG00000148834.12	ENST00000432659.1	0	CPG_ov	104255003	104256003	5.49	Promoter (<=1kb)	10
DCAF12	1.44	0.000334	0.022	ENSG00000198876.12	ENST00000361264.8	0	CPG_ov	34126112	34127112	6.94	Promoter (<=1kb)	9
ARID5A	1.44	0.00035	0.0224	ENSG00000196843.15	ENST00000470579.5	0	CPG_ov	96536160	96537160	6.82	Promoter (<=1kb)	2
PUM2	1.44	0.00048	0.0254	ENSG00000055917.15	ENST00000361078.6	0	CPG_ov	20350381	20351381	7.64	Promoter (<=1kb)	2
YIF1B	1.44	0.00059	0.0275	ENSG00000167645.16	ENST00000592694.5	0	CPG_ov	38315599	38316599	7.26	Promoter (<=1kb)	19
FAM64A	1.44	0.000733	0.0298	ENSG00000129195.15	ENST00000572447.5	0	CPG_ov	6443675	6444675	6.49	Promoter (<=1kb)	17
CTB-25B13.9	1.44	0.000812	0.0313	ENSG00000267092.2	ENST00000590252.2	0	CPG_ov	1507694	1508694	6.33	Promoter (<=1kb)	19
RNPEP	1.44	0.000902	0.0326	ENSG00000176393.10	ENST00000487116.5	0	CPG_ov	201982694	201983694	6.15	Promoter (<=1kb)	1
FHOD1	1.44	0.000952	0.0332	ENSG00000135723.13	ENST00000258201.8	0	CPG_ov	67247059	67248059	6.66	Promoter (<=1kb)	16
DGKA	1.44	0.000962	0.0334	ENSG00000065357.19	ENST00000546878.5	0	CPG_ov	55926578	55927578	6.91	Promoter (<=1kb)	12
TNIP1	1.44	0.00105	0.0349	ENSG00000145901.14	ENST00000520931.5	0	CPG_ov	151080554	151081554	7.16	Promoter (<=1kb)	5
USB1	1.44	0.00131	0.0378	ENSG00000103005.11	ENST00000219281.7	0	CPG_ov	58000740	58001740	6.32	Promoter (<=1kb)	16
CADM2	1.44	0.00132	0.0378	ENSG00000175161.13	ENST00000383699.7	0	CPG_ov	84958402	84959402	6.64	Promoter (<=1kb)	3
PCK2	1.44	0.00138	0.0383	ENSG00000100889.11	ENST00000559250.5	0	CPG_ov	24093684	24094684	6.83	Promoter (<=1kb)	14
TEF	1.44	0.00142	0.0386	ENSG00000167074.14	ENST00000266304.8	0	CPG_ov	41381249	41382249	7.79	Promoter (<=1kb)	22
RHOBTB1	1.44	0.00143	0.0386	ENSG00000072422.16	ENST00000337910.9	0	CPG_ov	60943418	60944418	7.32	Promoter (<=1kb)	10
PPP3CA	1.44	0.0015	0.0394	ENSG00000138814.16	ENST00000512215.5	0	CPG_ov	101347261	101348261	7.34	Promoter (<=1kb)	4
NFKB2	1.44	0.0015	0.0395	ENSG00000077150.18	ENST00000593908.5	0	CPG_ov	102393912	102394912	6.78	Promoter (<=1kb)	10
NIPSNAP1	1.44	0.00174	0.042	ENSG00000184117.11	ENST00000216121.11	0	CPG_ov	29580661	29581661	5.6	Promoter (<=1kb)	22
TET2	1.44	0.00178	0.0423	ENSG00000168769.13	ENST00000513237.5	0	CPG_ov	105146147	105147147	5.76	Promoter (<=1kb)	4
MTM1	1.44	0.00179	0.0424	ENSG00000171100.14	ENST00000370396.6	0	CPG_ov	150567853	150568853	5.17	Promoter (<=1kb)	23
KLHL24	1.44	0.00189	0.0436	ENSG00000114796.15	ENST00000468001.1	0	CPG_ov	183635982	183636982	7.27	Promoter (<=1kb)	3
IGF2BP2	1.44	0.00209	0.0454	ENSG00000073792.15	ENST00000382199.6	0	CPG_ov	185824316	185825316	5.92	Promoter (<=1kb)	3
EHBP1	1.44	0.00213	0.0457	ENSG00000115504.14	ENST00000427809.5	0	CPG_ov	62705074	62706074	8.28	Promoter (<=1kb)	2
RIMKLB	1.44	0.00226	0.0467	ENSG00000166532.15	ENST00000541044.5	0	CPG_ov	8696962	8697962	7.04	Promoter (<=1kb)	12
MIRLET7BHG	1.44	0.00242	0.0479	ENSG00000197182.13	ENST00000443490.5	0	no_CPG	46080089	46081089	6.08	Promoter (<=1kb)	22
CMTM3	1.43	0.000356	0.0226	ENSG00000140931.19	ENST00000563672.5	0	CPG_ov	66603830	66604830	6.07	Promoter (<=1kb)	16
ZNF367	1.43	0.000564	0.0271	ENSG00000165244.6	ENST00000375256.4	0	CPG_ov	96418157	96419157	7.51	Promoter (<=1kb)	9
ACTR3	1.43	0.000606	0.0278	ENSG00000115091.11	ENST00000263238.6	0	CPG_ov	113889470	113890470	7.47	Promoter (<=1kb)	2
SLC30A1	1.43	0.000636	0.0283	ENSG00000170385.9	ENST00000367001.4	-57	CPG_ov	211578799	211579799	6.76	Promoter (<=1kb)	1
NPHP3-ACAD11	1.43	0.00108	0.0353	ENSG00000274810.3	ENST00000471702.2	-35	no_CPG	132722494	132723494	5.41	Promoter (<=1kb)	3
SGMS1	1.43	0.00112	0.0356	ENSG00000198964.13	ENST00000609445.5	0	CPG_ov	50624141	50625141	7.33	Promoter (<=1kb)	10
FTOP1	1.43	0.00113	0.0357	ENSG00000226491.1	ENST00000419363.1	-11236	CPG_ov	42809948	42810948	7.79	Distal Intergenic	2
JADE2	1.43	0.00113	0.0357	ENSG00000043143.20	ENST00000431355.1	353	CPG_ov	134526990	134527990	6.9	Promoter (<=1kb)	5
TMEM57	1.43	0.00113	0.0357	ENSG00000204178.9	ENST00000399766.7	0	CPG_ov	25430316	25431316	7.44	Promoter (<=1kb)	1
TRPM2-AS	1.43	0.00119	0.0364	ENSG00000230061.2	ENST00000456880.1	9617	no_CPG	44406123	44407123	6.41	Exon (ENST00000300482.9/ENSG00000142185.16, exon 20 of 33)	21
ZBTB40	1.43	0.00126	0.0372	ENSG00000184677.16	ENST00000374651.8	0	CPG_ov	22451309	22452309	6.75	Promoter (<=1kb)	1
SLC20A1	1.43	0.00131	0.0378	ENSG00000144136.10	ENST00000272542.7	0	CPG_ov	112645182	112646182	6.86	Promoter (<=1kb)	2
RP11-10K16.1	1.43	0.00131	0.0378	ENSG00000245213.6	ENST00000500914.6	-13692	no_CPG	173183344	173184344	5.83	Intron (ENST00000265000.8/ENSG00000109586.11, intron 1 of 11)	4
INTS6L	1.43	0.00149	0.0393	ENSG00000165359.14	ENST00000370752.4	0	CPG_ov	135520454	135521454	5.94	Promoter (<=1kb)	23
COMMD5	1.43	0.00154	0.0399	ENSG00000170619.9	ENST00000402718.4	0	CPG_ov	144852638	144853638	6.24	Promoter (<=1kb)	8
OPN3	1.43	0.0016	0.0405	ENSG00000054277.13	ENST00000366554.2	0	CPG_ov	241639920	241640920	5.27	Promoter (<=1kb)	1
ABI2	1.43	0.00166	0.0411	ENSG00000138443.15	ENST00000295851.9	0	CPG_ov	203327977	203328977	6.12	Promoter (<=1kb)	2
WDTC1	1.43	0.0017	0.0416	ENSG00000142784.15	ENST00000319394.7	0	CPG_ov	27234017	27235017	7.19	Promoter (<=1kb)	1
CLDND2	1.43	0.00171	0.0416	ENSG00000160318.6	ENST00000593841.1	0	CPG_ov	51367187	51368187	6.61	Promoter (<=1kb)	19
HLCS	1.43	0.002	0.0446	ENSG00000159267.14	ENST00000336648.8	0	CPG_ov	36989486	36990486	5.54	Promoter (<=1kb)	21
EHMT1	1.43	0.00206	0.0451	ENSG00000181090.18	ENST00000460843.5	0	CPG_ov	137618161	137619161	4.75	Promoter (<=1kb)	9
PLEC	1.43	0.0021	0.0454	ENSG00000178209.14	ENST00000322810.8	-125	no_CPG	143951001	143952001	7.42	Promoter (<=1kb)	8
ARHGAP31-AS1	1.43	0.00214	0.0458	ENSG00000241155.1	ENST00000466292.1	0	CPG_ov	119322337	119323337	6.29	Promoter (<=1kb)	3
MIB1	1.43	0.00219	0.0459	ENSG00000101752.11	ENST00000261537.6	-85	CPG_ov	21740235	21741235	8.07	Promoter (<=1kb)	18
SCO2	1.43	0.00231	0.0471	ENSG00000130489.13	ENST00000395693.7	0	CPG_ov	50525490	50526490	6.56	Promoter (<=1kb)	22
SLCO4A1	1.43	0.00235	0.0475	ENSG00000101187.15	ENST00000217159.5	0	CPG_ov	62641869	62642869	5.91	Promoter (<=1kb)	20
XPR1	1.43	0.00242	0.0479	ENSG00000143324.13	ENST00000367590.8	0	CPG_ov	180631682	180632682	6.87	Promoter (<=1kb)	1
DYNC1LI1	1.43	0.00245	0.0482	ENSG00000144635.8	ENST00000273130.8	0	CPG_ov	32570306	32571306	6.89	Promoter (<=1kb)	3
ATP5E	1.42	0.000214	0.0179	ENSG00000124172.9	ENST00000243997.7	0	CPG_ov	59031965	59032965	7.11	Promoter (<=1kb)	20
ADAM10	1.42	0.00071	0.0294	ENSG00000137845.14	ENST00000260408.7	0	CPG_ov	58749385	58750385	7.87	Promoter (<=1kb)	15
P3H1	1.42	0.00079	0.0308	ENSG00000117385.15	ENST00000397054.7	0	CPG_ov	42766646	42767646	7.6	Promoter (<=1kb)	1
SEPT10	1.42	0.000814	0.0313	ENSG00000186522.14	ENST00000356688.8	0	CPG_ov	109613683	109614683	7.29	Promoter (<=1kb)	2
PLXNA1	1.42	0.000836	0.0316	ENSG00000114554.11	ENST00000393409.2	-5257	CPG_ov	126982337	126983337	5.49	Distal Intergenic	3
PPP1R3E	1.42	0.000848	0.0316	ENSG00000235194.8	ENST00000558058.5	0	CPG_ov	23301465	23302465	6.93	Promoter (<=1kb)	14
MYCL	1.42	0.000892	0.0324	ENSG00000116990.10	ENST00000397332.2	0	CPG_ov	39901625	39902625	6.42	Promoter (<=1kb)	1
INTS6	1.42	0.000916	0.0326	ENSG00000102786.14	ENST00000398119.6	0	CPG_ov	51452473	51453473	6.78	Promoter (<=1kb)	13
DNAJB2	1.42	0.00103	0.0347	ENSG00000135924.15	ENST00000336576.9	0	CPG_ov	219278829	219279829	7.16	Promoter (<=1kb)	2
MATN1-AS1	1.42	0.0011	0.0355	ENSG00000186056.9	ENST00000414532.6	0	CPG_ov	30717715	30718715	6.8	Promoter (<=1kb)	1
KIF13B	1.42	0.00123	0.037	ENSG00000197892.12	ENST00000524189.5	0	CPG_ov	29262594	29263594	6.98	Promoter (<=1kb)	8
POLE4	1.42	0.00133	0.0379	ENSG00000115350.11	ENST00000483063.1	0	CPG_ov	74958401	74959401	5.96	Promoter (<=1kb)	2
ZNF48	1.42	0.00139	0.0385	ENSG00000180035.11	ENST00000495929.3	0	CPG_ov	30377841	30378841	6.53	Promoter (<=1kb)	16
TCERG1L	1.42	0.00145	0.039	ENSG00000176769.9	ENST00000368642.4	-125	CPG_ov	131311846	131312846	5.39	Promoter (<=1kb)	10
DARS	1.42	0.00168	0.0416	ENSG00000115866.10	ENST00000264161.8	0	CPG_ov	135984780	135985780	6.61	Promoter (<=1kb)	2
FAM234A	1.42	0.00191	0.0436	ENSG00000167930.15	ENST00000399932.7	0	CPG_ov	234424	235424	6.16	Promoter (<=1kb)	16
RABEPK	1.42	0.00193	0.0438	ENSG00000136933.16	ENST00000259460.12	0	CPG_ov	125199896	125200896	7.12	Promoter (<=1kb)	9
VKORC1L1	1.42	0.00209	0.0454	ENSG00000196715.5	ENST00000360768.3	0	CPG_ov	65872536	65873536	5.76	Promoter (<=1kb)	7
PARP12	1.42	0.0021	0.0454	ENSG00000059378.12	ENST00000473341.5	0	CPG_ov	140062273	140063273	5.12	Promoter (<=1kb)	7
FAM210B	1.42	0.00212	0.0455	ENSG00000124098.9	ENST00000371384.3	0	CPG_ov	56358268	56359268	5.18	Promoter (<=1kb)	20
PPP2R2A	1.42	0.00212	0.0456	ENSG00000221914.8	ENST00000380737.7	0	no_CPG	26290989	26291989	6.28	Promoter (<=1kb)	8
SETD2	1.42	0.0023	0.047	ENSG00000181555.19	ENST00000409792.3	0	CPG_ov	47163804	47164804	6.6	Promoter (<=1kb)	3
RFFL	1.42	0.00231	0.0471	ENSG00000092871.16	ENST00000315249.11	0	CPG_ov	35088538	35089538	6.6	Promoter (<=1kb)	17
LASP1	1.42	0.00232	0.0471	ENSG00000002834.17	ENST00000433206.6	0	CPG_ov	38868912	38869912	7.25	Promoter (<=1kb)	17
WNT10B	1.42	0.00234	0.0475	ENSG00000169884.13	ENST00000301061.8	0	no_CPG	48971140	48972140	5.68	Promoter (<=1kb)	12
ULBP3	1.42	0.00235	0.0476	ENSG00000131019.10	ENST00000367339.6	0	CPG_ov	150068701	150069701	6.54	Promoter (<=1kb)	6
REEP5	1.42	0.00236	0.0476	ENSG00000129625.12	ENST00000497856.6	0	CPG_ov	112921096	112922096	6.89	Promoter (<=1kb)	5
SLC12A6	1.42	0.0024	0.0478	ENSG00000140199.11	ENST00000354181.7	0	CPG_ov	34337390	34338390	6.4	Promoter (<=1kb)	15
NOG	1.42	0.0025	0.0485	ENSG00000183691.4	ENST00000332822.4	598	CPG_ov	56594297	56595297	5.94	Promoter (<=1kb)	17
MTERF3	1.42	0.00257	0.0491	ENSG00000156469.8	ENST00000523821.5	0	CPG_ov	96261501	96262501	6	Promoter (<=1kb)	8
RPS6KA2	1.41	0.000318	0.0216	ENSG00000071242.11	ENST00000265678.8	0	CPG_ov	166627001	166628001	7.08	Promoter (<=1kb)	6
DESI2	1.41	0.000453	0.0253	ENSG00000121644.18	ENST00000302550.15	0	CPG_ov	244652432	244653432	7.21	Promoter (<=1kb)	1
RAB11FIP2	1.41	0.000574	0.0272	ENSG00000107560.10	ENST00000355624.7	0	CPG_ov	118046499	118047499	6.05	Promoter (<=1kb)	10
MORC3	1.41	0.000583	0.0273	ENSG00000159256.12	ENST00000492336.5	0	CPG_ov	36319666	36320666	5.75	Promoter (<=1kb)	21
PMEPA1	1.41	0.0006	0.0276	ENSG00000124225.15	ENST00000341744.7	0	CPG_ov	57709654	57710654	7.34	Promoter (<=1kb)	20
ATXN3	1.41	0.000783	0.0306	ENSG00000066427.21	ENST00000558190.5	0	CPG_ov	92105986	92106986	6.59	Promoter (<=1kb)	14
MEX3C	1.41	0.000813	0.0313	ENSG00000176624.10	ENST00000616921.1	-21	CPG_ov	51197341	51198341	7.64	Promoter (<=1kb)	18
CALCOCO2	1.41	0.000921	0.0327	ENSG00000136436.14	ENST00000258947.7	0	CPG_ov	48830496	48831496	5.88	Promoter (<=1kb)	17
RB1	1.41	0.000943	0.033	ENSG00000139687.13	ENST00000525036.1	0	CPG_ov	48302951	48303951	6.19	Promoter (<=1kb)	13
RNF2	1.41	0.00105	0.0349	ENSG00000121481.10	ENST00000367510.7	0	CPG_ov	185045112	185046112	6.18	Promoter (<=1kb)	1
KHNYN	1.41	0.00106	0.035	ENSG00000100441.9	ENST00000556510.1	0	CPG_ov	24429965	24430965	6.32	Promoter (<=1kb)	14
YPEL1	1.41	0.00114	0.0358	ENSG00000100027.14	ENST00000339468.7	0	CPG_ov	21735353	21736353	5.18	Promoter (<=1kb)	22
RORA	1.41	0.00124	0.0371	ENSG00000069667.15	ENST00000551975.5	954	CPG_ov	61227179	61228179	6.69	Promoter (<=1kb)	15
TBL1X	1.41	0.00131	0.0378	ENSG00000101849.15	ENST00000415293.5	61	no_CPG	9463392	9464392	5.09	Promoter (<=1kb)	23
VWA8	1.41	0.00131	0.0378	ENSG00000102763.16	ENST00000379310.7	0	CPG_ov	41960477	41961477	5.54	Promoter (<=1kb)	13
ARAP1	1.41	0.00133	0.0379	ENSG00000186635.14	ENST00000393609.7	0	CPG_ov	72752007	72753007	6.43	Promoter (<=1kb)	11
STX4	1.41	0.00134	0.0379	ENSG00000103496.14	ENST00000493902.5	0	CPG_ov	31033072	31034072	5.64	Promoter (<=1kb)	16
PTBP3	1.41	0.00142	0.0386	ENSG00000119314.15	ENST00000334318.10	0	CPG_ov	112333159	112334159	6.7	Promoter (<=1kb)	9
GSG1	1.41	0.00143	0.0387	ENSG00000111305.18	ENST00000545401.5	1884	CPG_ov	13100758	13101758	7.49	Promoter (1-2kb)	12
TNNC2	1.41	0.00146	0.0391	ENSG00000101470.9	ENST00000372557.1	0	CPG_ov	45833490	45834490	6.69	Promoter (<=1kb)	20
LSS	1.41	0.00165	0.0411	ENSG00000160285.14	ENST00000356396.8	0	CPG_ov	46228302	46229302	6.58	Promoter (<=1kb)	21
KCNC3	1.41	0.00178	0.0424	ENSG00000131398.13	ENST00000376959.6	0	CPG_ov	50329209	50330209	7.39	Promoter (<=1kb)	19
HSD11B1L	1.41	0.00211	0.0454	ENSG00000167733.13	ENST00000581423.1	0	CPG_ov	5686504	5687504	4.67	Promoter (<=1kb)	19
RP11-187C18.4	1.41	0.00212	0.0455	ENSG00000276832.1	ENST00000616414.1	-16642	CPG_ov	41358683	41359683	5.05	Distal Intergenic	9
IKZF2	1.41	0.00262	0.0498	ENSG00000030419.16	ENST00000451136.6	0	CPG_ov	213151523	213152523	6.13	Promoter (<=1kb)	2
ACAP2	1.4	0.000252	0.0193	ENSG00000114331.13	ENST00000326793.10	0	CPG_ov	195442592	195443592	6.26	Promoter (<=1kb)	3
RP11-168L22.2	1.4	0.000334	0.022	ENSG00000224265.1	ENST00000451438.1	-18031	CPG_ov	43304634	43305634	5.85	Distal Intergenic	10
ST20	1.4	0.000557	0.0269	ENSG00000180953.11	ENST00000485386.1	0	CPG_ov	79923417	79924417	7.34	Promoter (<=1kb)	15
ACO1	1.4	0.000593	0.0275	ENSG00000122729.18	ENST00000541043.5	0	CPG_ov	32384111	32385111	6.19	Promoter (<=1kb)	9
CBX8	1.4	0.00121	0.0368	ENSG00000141570.10	ENST00000269385.8	0	CPG_ov	79796616	79797616	7.87	Promoter (<=1kb)	17
C7orf50	1.4	0.00122	0.0368	ENSG00000146540.14	ENST00000357429.10	0	CPG_ov	1137966	1138966	7.52	Promoter (<=1kb)	7
TRIM3	1.4	0.00125	0.0371	ENSG00000110171.18	ENST00000525074.5	0	CPG_ov	6473601	6474601	6.14	Promoter (<=1kb)	11
THUMPD1	1.4	0.00142	0.0386	ENSG00000066654.13	ENST00000636554.1	0	CPG_ov	20741100	20742100	6.66	Promoter (<=1kb)	16
NECTIN3	1.4	0.00175	0.0422	ENSG00000177707.10	ENST00000485303.5	0	CPG_ov	111070857	111071857	7.35	Promoter (<=1kb)	3
TRAPPC3	1.4	0.00212	0.0456	ENSG00000054116.11	ENST00000617904.4	0	CPG_ov	36155558	36156558	6.02	Promoter (<=1kb)	1
CMTM6	1.4	0.00227	0.0467	ENSG00000091317.7	ENST00000495177.1	0	CPG_ov	32502161	32503161	6.72	Promoter (<=1kb)	3
PPP3CA	1.4	0.00236	0.0476	ENSG00000138814.16	ENST00000529324.5	-18674	no_CPG	101366952	101367952	3.96	Distal Intergenic	4
PDLIM7	1.4	0.00247	0.0483	ENSG00000196923.13	ENST00000359895.6	0	CPG_ov	177497314	177498314	7.23	Promoter (<=1kb)	5
GDE1	1.4	0.00255	0.0489	ENSG00000006007.11	ENST00000353258.7	0	CPG_ov	19521522	19522522	6.37	Promoter (<=1kb)	16
ORAI1	1.4	0.00256	0.049	ENSG00000276045.2	ENST00000617316.1	0	CPG_ov	121626065	121627065	6.34	Promoter (<=1kb)	12
NOL4L	1.4	0.00263	0.0498	ENSG00000197183.13	ENST00000326071.8	-45	CPG_ov	32483627	32484627	6.18	Promoter (<=1kb)	20
SEC61A1	1.39	0.000428	0.0248	ENSG00000058262.9	ENST00000243253.7	0	CPG_ov	128051647	128052647	5.94	Promoter (<=1kb)	3
DNAAF5	1.39	0.000802	0.031	ENSG00000164818.15	ENST00000297440.10	0	CPG_ov	726004	727004	5.95	Promoter (<=1kb)	7
CDK8	1.39	0.00084	0.0316	ENSG00000132964.11	ENST00000536792.5	0	CPG_ov	26253450	26254450	6.09	Promoter (<=1kb)	13
RP11-169K16.8	1.39	0.000904	0.0326	ENSG00000178715.8	ENST00000321418.6	6824	CPG_ov	15835056	15836056	7.32	Exon (ENST00000317122.2/ENSG00000179743.4, exon 2 of 2)	1
ZNF580	1.39	0.000914	0.0326	ENSG00000213015.8	ENST00000543039.2	0	CPG_ov	55641295	55642295	5.97	Promoter (<=1kb)	19
CISH	1.39	0.000952	0.0332	ENSG00000114737.15	ENST00000491847.1	0	CPG_ov	50611462	50612462	6.67	Promoter (<=1kb)	3
ACLY	1.39	0.00111	0.0356	ENSG00000131473.16	ENST00000352035.6	0	CPG_ov	41918635	41919635	6.78	Promoter (<=1kb)	17
FOXN2	1.39	0.00115	0.0358	ENSG00000170802.15	ENST00000413569.5	0	CPG_ov	48313935	48314935	7.2	Promoter (<=1kb)	2
HNRNPF	1.39	0.00125	0.0371	ENSG00000169813.16	ENST00000356053.7	0	CPG_ov	43408595	43409595	8	Promoter (<=1kb)	10
MIR193A	1.39	0.00153	0.0398	ENSG00000207614.1	ENST00000384882.1	-9470	CPG_ov	31549526	31550526	7	Distal Intergenic	17
CD82	1.39	0.00167	0.0414	ENSG00000085117.11	ENST00000227155.8	0	CPG_ov	44564720	44565720	7.28	Promoter (<=1kb)	11
ZNF652	1.39	0.0018	0.0427	ENSG00000198740.8	ENST00000508237.5	0	CPG_ov	49361875	49362875	5.65	Promoter (<=1kb)	17
NRP1	1.39	0.00181	0.0427	ENSG00000099250.17	ENST00000374875.5	0	CPG_ov	33334373	33335373	6.47	Promoter (<=1kb)	10
SPHK1	1.39	0.00194	0.044	ENSG00000176170.13	ENST00000590959.5	0	CPG_ov	76384618	76385618	6.74	Promoter (<=1kb)	17
PDK1	1.39	0.00203	0.0448	ENSG00000152256.13	ENST00000436490.5	0	CPG_ov	172555433	172556433	6.56	Promoter (<=1kb)	2
ERN1	1.39	0.00204	0.0448	ENSG00000178607.15	ENST00000433197.3	0	CPG_ov	64129788	64130788	6.55	Promoter (<=1kb)	17
RP11-629F19.1	1.39	0.00242	0.0479	ENSG00000258385.1	ENST00000554380.1	-141515	no_CPG	41153771	41154771	4.9	Distal Intergenic	14
PALD1	1.39	0.00246	0.0483	ENSG00000107719.8	ENST00000263563.6	0	CPG_ov	70478009	70479009	6.14	Promoter (<=1kb)	10
PLEKHO2	1.39	0.00248	0.0484	ENSG00000241839.9	ENST00000616065.4	0	CPG_ov	64841067	64842067	6.89	Promoter (<=1kb)	15
STX7	1.39	0.00257	0.0491	ENSG00000079950.13	ENST00000367941.6	0	CPG_ov	132512569	132513569	6.88	Promoter (<=1kb)	6
HM13-AS1	1.38	0.000222	0.0181	ENSG00000230613.1	ENST00000412178.1	0	CPG_ov	31572512	31573512	7.61	Promoter (<=1kb)	20
PGRMC2	1.38	0.00048	0.0254	ENSG00000164040.16	ENST00000296425.9	0	CPG_ov	128287457	128288457	7.46	Promoter (<=1kb)	4
NLGN1	1.38	0.000621	0.0281	ENSG00000169760.17	ENST00000423427.1	0	CPG_ov	173395294	173396294	6.77	Promoter (<=1kb)	3
ZFHX2	1.38	0.000633	0.0283	ENSG00000136367.13	ENST00000412565.2	0	CPG_ov	23555569	23556569	6.56	Promoter (<=1kb)	14
IDH3G	1.38	0.000815	0.0313	ENSG00000067829.18	ENST00000370092.7	0	CPG_ov	153793848	153794848	6.87	Promoter (<=1kb)	23
ZBTB11-AS1	1.38	0.000867	0.032	ENSG00000256628.3	ENST00000609682.1	0	CPG_ov	101676097	101677097	7.4	Promoter (<=1kb)	3
ARPC5L	1.38	0.00087	0.0321	ENSG00000136950.13	ENST00000259477.6	0	CPG_ov	124868441	124869441	5.6	Promoter (<=1kb)	9
SETD9	1.38	0.000989	0.0339	ENSG00000155542.11	ENST00000628593.1	0	CPG_ov	56909307	56910307	7.53	Promoter (<=1kb)	5
URI1	1.38	0.00103	0.0347	ENSG00000105176.17	ENST00000392271.5	0	CPG_ov	29941989	29942989	6.38	Promoter (<=1kb)	19
KSR1	1.38	0.00104	0.0349	ENSG00000141068.13	ENST00000580163.5	0	CPG_ov	27456023	27457023	5.81	Promoter (<=1kb)	17
BCOR	1.38	0.00118	0.0363	ENSG00000183337.16	ENST00000378455.8	0	CPG_ov	40176370	40177370	4.92	Promoter (<=1kb)	23
LMAN1	1.38	0.00118	0.0364	ENSG00000074695.5	ENST00000587561.1	0	CPG_ov	59358826	59359826	5.92	Promoter (<=1kb)	18
ZYG11B	1.38	0.00123	0.037	ENSG00000162378.12	ENST00000545132.5	0	CPG_ov	52725917	52726917	6.67	Promoter (<=1kb)	1
BBX	1.38	0.00125	0.0371	ENSG00000114439.18	ENST00000415149.6	0	CPG_ov	107522531	107523531	7.79	Promoter (<=1kb)	3
SSC4D	1.38	0.00132	0.0378	ENSG00000146700.8	ENST00000492979.2	12927	CPG_ov	76379563	76380563	6.49	Distal Intergenic	7
TAOK2	1.38	0.00137	0.0383	ENSG00000149930.17	ENST00000308893.8	0	CPG_ov	29973243	29974243	6.13	Promoter (<=1kb)	16
NAP1L1	1.38	0.00139	0.0385	ENSG00000187109.13	ENST00000618691.4	0	CPG_ov	76084161	76085161	7.32	Promoter (<=1kb)	12
C5orf30	1.38	0.00147	0.0392	ENSG00000181751.9	ENST00000319933.6	0	CPG_ov	103258090	103259090	6.43	Promoter (<=1kb)	5
BCL2L1	1.38	0.00152	0.0397	ENSG00000171552.12	ENST00000450273.1	0	CPG_ov	31723199	31724199	7.72	Promoter (<=1kb)	20
DGKE	1.38	0.00176	0.0422	ENSG00000153933.9	ENST00000284061.7	0	CPG_ov	56833406	56834406	6.36	Promoter (<=1kb)	17
PROC	1.38	0.00176	0.0422	ENSG00000115718.17	ENST00000474030.5	-9647	CPG_ov	127407780	127408780	6.48	Distal Intergenic	2
MFSD3	1.38	0.00185	0.0429	ENSG00000167700.8	ENST00000301327.4	0	CPG_ov	144508445	144509445	7.24	Promoter (<=1kb)	8
PAPOLA	1.38	0.00185	0.043	ENSG00000090060.17	ENST00000216277.12	0	CPG_ov	96501790	96502790	6.63	Promoter (<=1kb)	14
RP11-498P14.5	1.38	0.00206	0.0451	ENSG00000203279.3	ENST00000607322.1	0	CPG_ov	97237835	97238835	5.94	Promoter (<=1kb)	9
FOXD1	1.38	0.0021	0.0454	ENSG00000251493.4	ENST00000615637.2	0	CPG_ov	73448247	73449247	6.47	Promoter (<=1kb)	5
NINJ1	1.38	0.00235	0.0475	ENSG00000131669.9	ENST00000470314.5	0	CPG_ov	93133284	93134284	5.78	Promoter (<=1kb)	9
ZMYND8	1.37	4.46e-05	0.00784	ENSG00000101040.19	ENST00000536340.5	0	no_CPG	47356303	47357303	5.72	Promoter (<=1kb)	20
L3MBTL1	1.37	0.000394	0.0237	ENSG00000185513.14	ENST00000373135.7	0	CPG_ov	43513773	43514773	7.15	Promoter (<=1kb)	20
SERTAD2	1.37	0.000625	0.0281	ENSG00000179833.4	ENST00000476805.2	0	CPG_ov	64750686	64751686	8.61	Promoter (<=1kb)	2
RBX1	1.37	0.000695	0.0292	ENSG00000100387.8	ENST00000476110.1	0	CPG_ov	40950863	40951863	7.52	Promoter (<=1kb)	22
DAG1	1.37	0.000883	0.0323	ENSG00000173402.11	ENST00000421560.5	0	CPG_ov	49469923	49470923	6.9	Promoter (<=1kb)	3
FAM49B	1.37	0.00103	0.0347	ENSG00000153310.18	ENST00000519824.6	0	CPG_ov	129939406	129940406	7.78	Promoter (<=1kb)	8
BARD1	1.37	0.00103	0.0347	ENSG00000138376.10	ENST00000260947.8	0	CPG_ov	214809435	214810435	6.72	Promoter (<=1kb)	2
LRRC45	1.37	0.00116	0.0361	ENSG00000169683.7	ENST00000306688.7	0	CPG_ov	82022622	82023622	7.61	Promoter (<=1kb)	17
REEP6	1.37	0.00121	0.0368	ENSG00000115255.10	ENST00000233596.7	0	CPG_ov	1490513	1491513	6.71	Promoter (<=1kb)	19
SPTBN4	1.37	0.00126	0.0372	ENSG00000160460.15	ENST00000599926.5	0	CPG_ov	40570450	40571450	6.63	Promoter (<=1kb)	19
STT3B	1.37	0.00141	0.0386	ENSG00000163527.9	ENST00000453168.5	0	CPG_ov	31532015	31533015	7.85	Promoter (<=1kb)	3
C4orf36	1.37	0.00142	0.0386	ENSG00000163633.10	ENST00000508280.5	0	CPG_ov	86934752	86935752	6.71	Promoter (<=1kb)	4
RP11-96H19.1	1.37	0.00143	0.0386	ENSG00000257261.5	ENST00000551503.5	0	CPG_ov	46383089	46384089	7.04	Promoter (<=1kb)	12
ADD3	1.37	0.00143	0.0387	ENSG00000148700.14	ENST00000356080.8	0	CPG_ov	110007548	110008548	7.21	Promoter (<=1kb)	10
GPBP1	1.37	0.00148	0.0393	ENSG00000062194.15	ENST00000424459.7	0	CPG_ov	57173243	57174243	7.46	Promoter (<=1kb)	5
TMEM92	1.37	0.0017	0.0416	ENSG00000167105.7	ENST00000507382.1	-469	no_CPG	50272958	50273958	4.82	Promoter (<=1kb)	17
IARS2	1.37	0.0017	0.0416	ENSG00000067704.9	ENST00000366922.2	0	CPG_ov	220093590	220094590	6.61	Promoter (<=1kb)	1
ALKBH4	1.37	0.00178	0.0424	ENSG00000160993.3	ENST00000292566.3	0	CPG_ov	102464681	102465681	6.64	Promoter (<=1kb)	7
FARP2	1.37	0.00214	0.0458	ENSG00000006607.13	ENST00000264042.7	0	CPG_ov	241355845	241356845	6.01	Promoter (<=1kb)	2
ZNF33A	1.37	0.00218	0.0459	ENSG00000189180.15	ENST00000307441.13	0	CPG_ov	38010379	38011379	7.79	Promoter (<=1kb)	10
TMEM179B	1.37	0.00224	0.0464	ENSG00000185475.9	ENST00000532586.1	0	CPG_ov	62786843	62787843	6.26	Promoter (<=1kb)	11
CSAD	1.37	0.00263	0.0499	ENSG00000139631.18	ENST00000267085.8	0	CPG_ov	53180232	53181232	7.16	Promoter (<=1kb)	12
ARHGEF1	1.36	0.000286	0.0208	ENSG00000076928.17	ENST00000378152.8	0	CPG_ov	41883657	41884657	6.68	Promoter (<=1kb)	19
ZNF414	1.36	0.00035	0.0224	ENSG00000133250.13	ENST00000393927.8	0	CPG_ov	8513343	8514343	6.16	Promoter (<=1kb)	19
C16orf46	1.36	0.000836	0.0316	ENSG00000166455.13	ENST00000378611.8	0	CPG_ov	81076608	81077608	7.43	Promoter (<=1kb)	16
RP11-51O6.1	1.36	0.000944	0.033	ENSG00000224631.4	ENST00000591758.1	-72476	no_CPG	61128440	61129440	5.93	Distal Intergenic	16
PHPT1	1.36	0.00113	0.0357	ENSG00000054148.17	ENST00000492540.5	0	CPG_ov	136848924	136849924	7.08	Promoter (<=1kb)	9
RP11-472N13.2	1.36	0.00115	0.0359	ENSG00000223834.2	ENST00000420945.1	-639	CPG_ov	31602961	31603961	6.97	Promoter (<=1kb)	10
BRAT1	1.36	0.00119	0.0364	ENSG00000106009.15	ENST00000340611.8	0	CPG_ov	2555129	2556129	7.19	Promoter (<=1kb)	7
CCDC85A	1.36	0.00135	0.0381	ENSG00000055813.5	ENST00000407595.2	0	CPG_ov	56183384	56184384	6.56	Promoter (<=1kb)	2
AKIRIN1	1.36	0.00136	0.0381	ENSG00000174574.15	ENST00000432648.7	0	CPG_ov	38990608	38991608	6.43	Promoter (<=1kb)	1
MAP4	1.36	0.00142	0.0386	ENSG00000047849.21	ENST00000395734.7	0	CPG_ov	48088674	48089674	7.67	Promoter (<=1kb)	3
RP11-567J20.3	1.36	0.00169	0.0416	ENSG00000253140.1	ENST00000521359.1	2017	CPG_ov	48514072	48515072	6.55	Promoter (2-3kb)	8
TBC1D4	1.36	0.00197	0.0443	ENSG00000136111.12	ENST00000377625.6	0	CPG_ov	75482017	75483017	5.91	Promoter (<=1kb)	13
FKBP2	1.36	0.00218	0.0459	ENSG00000173486.12	ENST00000536642.5	0	CPG_ov	64240551	64241551	6.6	Promoter (<=1kb)	11
RPP25L	1.36	0.0024	0.0478	ENSG00000164967.9	ENST00000297613.4	0	CPG_ov	34611716	34612716	6.06	Promoter (<=1kb)	9
TGFBR1	1.36	0.00246	0.0483	ENSG00000106799.12	ENST00000374994.8	0	CPG_ov	99104382	99105382	5.84	Promoter (<=1kb)	9
MBD6	1.36	0.00262	0.0498	ENSG00000166987.14	ENST00000355673.7	0	CPG_ov	57522019	57523019	6.13	Promoter (<=1kb)	12
YBX2P1	1.35	0.000371	0.0231	ENSG00000213438.2	ENST00000394192.2	2746	no_CPG	123994656	123995656	6	Promoter (2-3kb)	10
DPY19L2	1.35	0.00109	0.0354	ENSG00000177990.11	ENST00000324472.8	0	CPG_ov	63667774	63668774	5.71	Promoter (<=1kb)	12
USP9X	1.35	0.00134	0.0379	ENSG00000124486.12	ENST00000378308.6	0	CPG_ov	41084641	41085641	7.5	Promoter (<=1kb)	23
BNIP3L	1.35	0.00134	0.038	ENSG00000104765.15	ENST00000380629.6	0	CPG_ov	26382660	26383660	7.2	Promoter (<=1kb)	8
OPTN	1.35	0.00137	0.0383	ENSG00000123240.16	ENST00000263036.9	0	CPG_ov	13099430	13100430	6.79	Promoter (<=1kb)	10
PRMT2	1.35	0.00162	0.0407	ENSG00000160310.16	ENST00000355680.7	0	CPG_ov	46634887	46635887	6.23	Promoter (<=1kb)	21
CARD19	1.35	0.00164	0.041	ENSG00000165233.17	ENST00000375464.6	0	CPG_ov	93095281	93096281	7.01	Promoter (<=1kb)	9
SLC2A1	1.35	0.00172	0.0418	ENSG00000117394.19	ENST00000426263.7	0	CPG_ov	42958484	42959484	7.46	Promoter (<=1kb)	1
RP11-150O12.6	1.35	0.00175	0.0422	ENSG00000253414.2	ENST00000521989.2	-4003	no_CPG	37521024	37522024	6.49	Intron (ENST00000519738.5/ENSG00000253161.5, intron 3 of 5)	8
NDEL1	1.35	0.00182	0.0429	ENSG00000166579.15	ENST00000582665.5	0	CPG_ov	8435405	8436405	6.48	Promoter (<=1kb)	17
SETX	1.35	0.00183	0.0429	ENSG00000107290.13	ENST00000224140.5	0	CPG_ov	132354590	132355590	6.66	Promoter (<=1kb)	9
ZNF275	1.35	0.00187	0.0431	ENSG00000063587.13	ENST00000370251.3	0	CPG_ov	153333573	153334573	5.24	Promoter (<=1kb)	23
METTL9	1.35	0.00205	0.045	ENSG00000197006.13	ENST00000358154.7	0	CPG_ov	21598997	21599997	6.27	Promoter (<=1kb)	16
ST7	1.35	0.00216	0.0459	ENSG00000004866.19	ENST00000265437.9	0	CPG_ov	116953280	116954280	5.14	Promoter (<=1kb)	7
PTPN18	1.35	0.0022	0.046	ENSG00000072135.12	ENST00000481492.1	0	CPG_ov	130371891	130372891	6.71	Promoter (<=1kb)	2
LAPTM4B	1.35	0.00232	0.0472	ENSG00000104341.16	ENST00000521545.6	0	CPG_ov	97775735	97776735	4.84	Promoter (<=1kb)	8
NTMT1	1.35	0.00239	0.0478	ENSG00000148335.14	ENST00000611055.4	0	CPG_ov	129625770	129626770	5.39	Promoter (<=1kb)	9
MIR6841	1.35	0.00242	0.0479	ENSG00000283327.1	ENST00000637129.1	11340	CPG_ov	24941527	24942527	6.32	Distal Intergenic	8
ALMS1	1.35	0.00253	0.0487	ENSG00000116127.17	ENST00000484298.5	0	CPG_ov	73385309	73386309	7.86	Promoter (<=1kb)	2
ERP29	1.34	0.000411	0.0243	ENSG00000089248.6	ENST00000261735.3	0	CPG_ov	112012784	112013784	6.89	Promoter (<=1kb)	12
ST3GAL3	1.34	0.000451	0.0253	ENSG00000126091.19	ENST00000262915.7	0	CPG_ov	43707059	43708059	6.61	Promoter (<=1kb)	1
TMEM192	1.34	0.000556	0.0269	ENSG00000170088.13	ENST00000306480.10	0	CPG_ov	165112501	165113501	7.02	Promoter (<=1kb)	4
ZNF507	1.34	0.000575	0.0272	ENSG00000168813.16	ENST00000311921.8	0	CPG_ov	32345248	32346248	5.52	Promoter (<=1kb)	19
SF3A1	1.34	0.000576	0.0273	ENSG00000099995.18	ENST00000215793.12	0	CPG_ov	30356291	30357291	7.04	Promoter (<=1kb)	22
STAT6	1.34	0.000598	0.0276	ENSG00000166888.10	ENST00000300134.7	0	no_CPG	57111287	57112287	6.61	Promoter (<=1kb)	12
SPOP	1.34	0.000937	0.0329	ENSG00000121067.17	ENST00000393328.6	0	CPG_ov	49677477	49678477	7.18	Promoter (<=1kb)	17
MXI1	1.34	0.00104	0.0349	ENSG00000119950.20	ENST00000239007.11	0	CPG_ov	110225567	110226567	6.08	Promoter (<=1kb)	10
NMRK1	1.34	0.00108	0.0353	ENSG00000106733.20	ENST00000376811.5	0	CPG_ov	75087813	75088813	6.6	Promoter (<=1kb)	9
TIPARP	1.34	0.00117	0.0361	ENSG00000163659.12	ENST00000461166.5	0	CPG_ov	156674354	156675354	6.8	Promoter (<=1kb)	3
LVRN	1.34	0.00128	0.0374	ENSG00000172901.19	ENST00000504467.5	-20755	no_CPG	115940699	115941699	5	Distal Intergenic	5
TEAD2	1.34	0.0013	0.0377	ENSG00000074219.13	ENST00000311227.6	0	CPG_ov	49362421	49363421	5.77	Promoter (<=1kb)	19
DNAH9	1.34	0.00165	0.0411	ENSG00000007174.17	ENST00000262442.8	0	CPG_ov	11597974	11598974	5.97	Promoter (<=1kb)	17
PSIP1	1.34	0.00166	0.0411	ENSG00000164985.14	ENST00000380738.8	0	CPG_ov	15510456	15511456	5.34	Promoter (<=1kb)	9
CEP131	1.34	0.00172	0.0418	ENSG00000141577.13	ENST00000374782.7	0	CPG_ov	81222643	81223643	6.36	Promoter (<=1kb)	17
NCOA6	1.34	0.00186	0.0431	ENSG00000198646.13	ENST00000359003.6	0	CPG_ov	34824682	34825682	5.63	Promoter (<=1kb)	20
HEBP1	1.34	0.00193	0.0439	ENSG00000013583.8	ENST00000014930.8	0	CPG_ov	13000110	13001110	7	Promoter (<=1kb)	12
PYCR2	1.34	0.00214	0.0458	ENSG00000143811.17	ENST00000612651.4	0	CPG_ov	225923920	225924920	6.8	Promoter (<=1kb)	1
SMARCE1	1.34	0.00215	0.0458	ENSG00000073584.18	ENST00000348513.10	0	CPG_ov	40647672	40648672	6.47	Promoter (<=1kb)	17
PPP1CB	1.34	0.00226	0.0467	ENSG00000213639.9	ENST00000455580.5	0	CPG_ov	28751383	28752383	6.98	Promoter (<=1kb)	2
VAV2	1.34	0.00255	0.049	ENSG00000160293.16	ENST00000371851.1	0	CPG_ov	133992530	133993530	5.88	Promoter (<=1kb)	9
EIF2AK4	1.34	0.0026	0.0495	ENSG00000128829.11	ENST00000559624.5	0	CPG_ov	39933521	39934521	6.86	Promoter (<=1kb)	15
FBXO31	1.33	0.00043	0.0248	ENSG00000103264.16	ENST00000311635.11	0	CPG_ov	87383645	87384645	6.3	Promoter (<=1kb)	16
EGLN2	1.33	0.00046	0.0253	ENSG00000269858.5	ENST00000598654.1	0	CPG_ov	40798452	40799452	6.67	Promoter (<=1kb)	19
MARCH4	1.33	0.00047	0.0253	ENSG00000144583.4	ENST00000273067.4	-546	no_CPG	216372573	216373573	5.7	Promoter (<=1kb)	2
SNAPC2	1.33	0.000642	0.0285	ENSG00000104976.11	ENST00000221573.10	0	CPG_ov	7919883	7920883	5.72	Promoter (<=1kb)	19
CDKL1	1.33	0.000779	0.0306	ENSG00000100490.9	ENST00000216378.2	0	CPG_ov	50396548	50397548	6.38	Promoter (<=1kb)	14
E2F1	1.33	0.000842	0.0316	ENSG00000101412.12	ENST00000343380.5	0	CPG_ov	33686077	33687077	6.36	Promoter (<=1kb)	20
AHSA2	1.33	0.000891	0.0324	ENSG00000173209.22	ENST00000357022.6	0	CPG_ov	61176675	61177675	6.68	Promoter (<=1kb)	2
TKT	1.33	0.001	0.0343	ENSG00000163931.15	ENST00000462138.5	0	CPG_ov	53255370	53256370	5.62	Promoter (<=1kb)	3
CLPP	1.33	0.00114	0.0358	ENSG00000125656.8	ENST00000245816.8	0	CPG_ov	6361020	6362020	5.13	Promoter (<=1kb)	19
SUCLG2	1.33	0.00121	0.0367	ENSG00000172340.14	ENST00000493112.5	0	CPG_ov	67654209	67655209	5.94	Promoter (<=1kb)	3
TRIB1	1.33	0.00128	0.0374	ENSG00000173334.3	ENST00000311922.3	0	CPG_ov	125429601	125430601	8.54	Promoter (<=1kb)	8
AHCY	1.33	0.00128	0.0374	ENSG00000101444.12	ENST00000217426.6	0	CPG_ov	34302519	34303519	6.92	Promoter (<=1kb)	20
MIR6088	1.33	0.0013	0.0376	ENSG00000275726.1	ENST00000611232.1	6515	CPG_ov	45443169	45444169	6.48	Intron (ENST00000423698.6/ENSG00000012061.15, intron 1 of 8)	19
CSK	1.33	0.00136	0.0381	ENSG00000103653.16	ENST00000569462.5	19	CPG_ov	74782624	74783624	4.75	Promoter (<=1kb)	15
DKC1	1.33	0.00147	0.0392	ENSG00000130826.16	ENST00000620277.4	0	CPG_ov	154762343	154763343	6.62	Promoter (<=1kb)	23
HILPDA	1.33	0.00155	0.0399	ENSG00000135245.9	ENST00000435296.2	0	CPG_ov	128455302	128456302	5.88	Promoter (<=1kb)	7
ZNF438	1.33	0.00158	0.0403	ENSG00000183621.15	ENST00000413025.5	0	CPG_ov	31031319	31032319	6.92	Promoter (<=1kb)	10
LPCAT4	1.33	0.0018	0.0427	ENSG00000176454.13	ENST00000314891.10	0	CPG_ov	34366850	34367850	6.55	Promoter (<=1kb)	15
FGF5	1.33	0.00205	0.045	ENSG00000138675.16	ENST00000312465.11	0	CPG_ov	80266205	80267205	6.33	Promoter (<=1kb)	4
PIWIL4	1.33	0.00211	0.0455	ENSG00000134627.11	ENST00000543336.5	0	CPG_ov	94543627	94544627	6.85	Promoter (<=1kb)	11
BAZ2B	1.33	0.0022	0.0461	ENSG00000123636.17	ENST00000437839.5	0	CPG_ov	159615067	159616067	6.97	Promoter (<=1kb)	2
PAPD7	1.33	0.00232	0.0471	ENSG00000112941.13	ENST00000230859.7	0	CPG_ov	6712765	6713765	7.14	Promoter (<=1kb)	5
INSR	1.33	0.00244	0.0481	ENSG00000171105.13	ENST00000601099.1	23418	CPG_ov	7098740	7099740	4.82	Distal Intergenic	19
ACSS2	1.33	0.00251	0.0486	ENSG00000131069.19	ENST00000360596.6	0	CPG_ov	34875998	34876998	7.03	Promoter (<=1kb)	20
RNF220	1.33	0.00251	0.0486	ENSG00000187147.17	ENST00000474064.5	0	CPG_ov	44631813	44632813	6.58	Promoter (<=1kb)	1
RSRP1	1.33	0.00254	0.0488	ENSG00000117616.17	ENST00000473314.6	0	CPG_ov	25337943	25338943	6.46	Promoter (<=1kb)	1
ROCK1	1.32	0.000562	0.0271	ENSG00000067900.7	ENST00000399799.2	0	CPG_ov	21111453	21112453	7.38	Promoter (<=1kb)	18
CDK12	1.32	0.000736	0.0298	ENSG00000167258.13	ENST00000584632.5	0	CPG_ov	39461257	39462257	6.98	Promoter (<=1kb)	17
SEPT7	1.32	0.0009	0.0325	ENSG00000122545.18	ENST00000635172.1	0	CPG_ov	35800650	35801650	7.5	Promoter (<=1kb)	7
HSPB1	1.32	0.00124	0.037	ENSG00000106211.8	ENST00000429938.1	14127	CPG_ov	76317704	76318704	7.1	Distal Intergenic	7
SMPD4	1.32	0.00134	0.038	ENSG00000136699.19	ENST00000431183.6	0	CPG_ov	130181299	130182299	7.23	Promoter (<=1kb)	2
STK17A	1.32	0.00138	0.0383	ENSG00000164543.5	ENST00000462448.1	0	CPG_ov	43582504	43583504	5.97	Promoter (<=1kb)	7
RASGEF1C	1.32	0.0014	0.0385	ENSG00000146090.15	ENST00000522500.5	0	CPG_ov	180136441	180137441	6.67	Promoter (<=1kb)	5
ARID4B	1.32	0.00147	0.0392	ENSG00000054267.20	ENST00000264183.7	0	CPG_ov	235327953	235328953	7.99	Promoter (<=1kb)	1
ARL2	1.32	0.00165	0.0411	ENSG00000213465.7	ENST00000246747.8	0	CPG_ov	65013483	65014483	7.21	Promoter (<=1kb)	11
SPAG4	1.32	0.00183	0.0429	ENSG00000061656.9	ENST00000463973.5	0	CPG_ov	35615940	35616940	7.04	Promoter (<=1kb)	20
ZBTB7B	1.32	0.00194	0.0439	ENSG00000160685.13	ENST00000417934.6	0	CPG_ov	155001779	155002779	7.29	Promoter (<=1kb)	1
AFTPH	1.32	0.00205	0.0449	ENSG00000119844.15	ENST00000238855.11	0	CPG_ov	64523728	64524728	7.39	Promoter (<=1kb)	2
RRBP1	1.32	0.00211	0.0454	ENSG00000125844.15	ENST00000377813.5	0	CPG_ov	17681789	17682789	5.97	Promoter (<=1kb)	20
RELA	1.32	0.00217	0.0459	ENSG00000173039.18	ENST00000406246.7	0	CPG_ov	65662680	65663680	6.23	Promoter (<=1kb)	11
OSBPL3	1.32	0.00221	0.0461	ENSG00000070882.12	ENST00000313367.6	0	CPG_ov	24979789	24980789	7.37	Promoter (<=1kb)	7
CCDC9	1.32	0.00227	0.0467	ENSG00000105321.12	ENST00000599398.5	0	CPG_ov	47256698	47257698	6.94	Promoter (<=1kb)	19
RP11-61J19.5	1.32	0.00238	0.0478	ENSG00000260805.2	ENST00000564287.2	417	CPG_ov	212558314	212559314	6.33	Promoter (<=1kb)	1
ATIC	1.31	0.000397	0.0238	ENSG00000138363.14	ENST00000236959.13	0	CPG_ov	215311548	215312548	6.37	Promoter (<=1kb)	2
DDB2	1.31	0.000482	0.0254	ENSG00000134574.11	ENST00000622878.4	0	no_CPG	47214223	47215223	7.17	Promoter (<=1kb)	11
RPUSD4	1.31	0.000699	0.0292	ENSG00000165526.8	ENST00000298317.8	0	CPG_ov	126211226	126212226	6.4	Promoter (<=1kb)	11
CYLD	1.31	0.000962	0.0334	ENSG00000083799.17	ENST00000569681.5	0	CPG_ov	50741491	50742491	6.69	Promoter (<=1kb)	16
CMC2	1.31	0.00115	0.0359	ENSG00000103121.8	ENST00000219400.7	0	CPG_ov	81006857	81007857	6.86	Promoter (<=1kb)	16
TOMM6	1.31	0.0013	0.0376	ENSG00000214736.7	ENST00000398884.7	0	CPG_ov	41786948	41787948	7.06	Promoter (<=1kb)	6
ERCC2	1.31	0.00133	0.0379	ENSG00000104884.14	ENST00000391945.8	0	CPG_ov	45370050	45371050	6.71	Promoter (<=1kb)	19
NPTN	1.31	0.00156	0.0399	ENSG00000156642.16	ENST00000345330.8	0	CPG_ov	73633043	73634043	6.53	Promoter (<=1kb)	15
RP11-108L7.15	1.31	0.00184	0.0429	ENSG00000273162.1	ENST00000609242.1	0	CPG_ov	101060545	101061545	7.04	Promoter (<=1kb)	10
BLMH	1.31	0.0019	0.0436	ENSG00000108578.14	ENST00000261714.10	0	CPG_ov	30291756	30292756	6.56	Promoter (<=1kb)	17
MDGA2	1.31	0.00195	0.044	ENSG00000139915.18	ENST00000399232.6	-504	CPG_ov	47675458	47676458	6.41	Promoter (<=1kb)	14
CDKL5	1.31	0.00196	0.0442	ENSG00000008086.11	ENST00000379996.7	0	CPG_ov	18424947	18425947	5.88	Promoter (<=1kb)	23
C14orf132	1.31	0.00218	0.0459	ENSG00000227051.6	ENST00000555004.2	0	CPG_ov	96038623	96039623	4.96	Promoter (<=1kb)	14
AHI1	1.31	0.00221	0.0461	ENSG00000135541.20	ENST00000367800.8	0	CPG_ov	135497378	135498378	6.55	Promoter (<=1kb)	6
HNRNPA3	1.31	0.00247	0.0484	ENSG00000170144.19	ENST00000392524.6	0	CPG_ov	177212235	177213235	7.37	Promoter (<=1kb)	2
RAB1A	1.31	0.00258	0.0493	ENSG00000138069.16	ENST00000494188.1	0	CPG_ov	65129771	65130771	7.59	Promoter (<=1kb)	2
FAM66B	1.31	0.0026	0.0495	ENSG00000215374.5	ENST00000529456.1	0	CPG_ov	7354665	7355665	5.46	Promoter (<=1kb)	8
INAFM1	1.3	0.000771	0.0305	ENSG00000257704.3	ENST00000552360.3	0	CPG_ov	47273698	47274698	5.52	Promoter (<=1kb)	19
LDHB	1.3	0.00131	0.0378	ENSG00000111716.12	ENST00000396076.5	0	CPG_ov	21657397	21658397	7	Promoter (<=1kb)	12
ZNF699	1.3	0.00143	0.0386	ENSG00000196110.7	ENST00000591998.5	0	CPG_ov	9309254	9310254	5.93	Promoter (<=1kb)	19
CDC14A	1.3	0.0016	0.0405	ENSG00000079335.18	ENST00000455467.5	0	CPG_ov	100351670	100352670	7.13	Promoter (<=1kb)	1
YBX3	1.3	0.00178	0.0423	ENSG00000060138.12	ENST00000279550.11	0	CPG_ov	10722786	10723786	6.31	Promoter (<=1kb)	12
PAICS	1.3	0.00195	0.044	ENSG00000128050.8	ENST00000514888.5	0	CPG_ov	56435220	56436220	7.82	Promoter (<=1kb)	4
GPHN	1.3	0.00217	0.0459	ENSG00000171723.15	ENST00000459628.5	0	CPG_ov	66507700	66508700	8.22	Promoter (<=1kb)	14
CTC-492K19.4	1.3	0.00222	0.0462	ENSG00000268366.1	ENST00000599050.1	0	CPG_ov	40442767	40443767	7.15	Promoter (<=1kb)	19
SPRYD3	1.3	0.00224	0.0464	ENSG00000167778.8	ENST00000301463.8	0	CPG_ov	53078846	53079846	7.17	Promoter (<=1kb)	12
CTDSP2	1.3	0.0023	0.047	ENSG00000175215.10	ENST00000398073.6	0	CPG_ov	57846494	57847494	7.24	Promoter (<=1kb)	12
USP54	1.3	0.0023	0.047	ENSG00000166348.18	ENST00000339859.8	0	CPG_ov	73625451	73626451	6.93	Promoter (<=1kb)	10
ZSWIM4	1.3	0.0024	0.0478	ENSG00000132003.9	ENST00000254323.6	0	CPG_ov	13794781	13795781	6.4	Promoter (<=1kb)	19
NFIB	1.3	0.00247	0.0484	ENSG00000147862.15	ENST00000606230.2	0	CPG_ov	14322212	14323212	6.41	Promoter (<=1kb)	9
EIF1	1.3	0.00249	0.0485	ENSG00000173812.10	ENST00000462917.1	0	CPG_ov	41688588	41689588	8.03	Promoter (<=1kb)	17
MTA2	1.3	0.00264	0.0499	ENSG00000149480.6	ENST00000278823.6	0	CPG_ov	62601209	62602209	5.66	Promoter (<=1kb)	11
TXNDC17	1.3	0.00264	0.05	ENSG00000129235.10	ENST00000250101.9	0	CPG_ov	6640140	6641140	6.38	Promoter (<=1kb)	17
ARMC5	1.29	0.000499	0.0258	ENSG00000140691.16	ENST00000564900.1	0	CPG_ov	31459381	31460381	6.57	Promoter (<=1kb)	16
VCL	1.29	0.000547	0.0268	ENSG00000035403.16	ENST00000624354.3	0	CPG_ov	73997453	73998453	7.61	Promoter (<=1kb)	10
MIPEP	1.29	0.000669	0.029	ENSG00000027001.9	ENST00000382172.3	0	CPG_ov	23888908	23889908	6.16	Promoter (<=1kb)	13
CNOT8	1.29	0.000834	0.0316	ENSG00000155508.13	ENST00000523270.1	0	CPG_ov	154857903	154858903	7.33	Promoter (<=1kb)	5
PPP1R21	1.29	0.000891	0.0324	ENSG00000162869.15	ENST00000431614.5	0	CPG_ov	48440194	48441194	7.14	Promoter (<=1kb)	2
MAN1B1	1.29	0.00107	0.0352	ENSG00000177239.14	ENST00000371589.8	0	CPG_ov	137086370	137087370	6.28	Promoter (<=1kb)	9
UBE2K	1.29	0.00133	0.0379	ENSG00000078140.13	ENST00000261427.9	0	CPG_ov	39697488	39698488	6.86	Promoter (<=1kb)	4
FALEC	1.29	0.0014	0.0385	ENSG00000228126.1	ENST00000416894.1	0	CPG_ov	150515342	150516342	6.58	Promoter (<=1kb)	1
CITF22-92A6.2	1.29	0.00155	0.0399	ENSG00000280424.1	ENST00000624893.1	118	no_CPG	46006734	46007734	6.9	Promoter (<=1kb)	22
ZNF250	1.29	0.00157	0.0401	ENSG00000196150.13	ENST00000528258.5	0	CPG_ov	144900923	144901923	8.1	Promoter (<=1kb)	8
ZFAND3	1.29	0.00197	0.0442	ENSG00000156639.11	ENST00000287218.8	0	CPG_ov	37818919	37819919	7.39	Promoter (<=1kb)	6
BTBD9	1.29	0.0021	0.0454	ENSG00000183826.16	ENST00000481247.5	0	CPG_ov	38639294	38640294	6.18	Promoter (<=1kb)	6
PARP4	1.29	0.00218	0.0459	ENSG00000102699.5	ENST00000381989.3	0	CPG_ov	24511998	24512998	6.18	Promoter (<=1kb)	13
RERE	1.29	0.0022	0.046	ENSG00000142599.17	ENST00000337907.7	0	CPG_ov	8817302	8818302	5.97	Promoter (<=1kb)	1
MYBL1	1.29	0.00258	0.0492	ENSG00000185697.16	ENST00000522677.7	0	CPG_ov	66612911	66613911	7.37	Promoter (<=1kb)	8
KLF7	1.28	0.000716	0.0295	ENSG00000118263.14	ENST00000309446.10	0	CPG_ov	207165716	207166716	7.48	Promoter (<=1kb)	2
ZNF444	1.28	0.000798	0.0309	ENSG00000167685.14	ENST00000588358.5	0	CPG_ov	56140365	56141365	6.83	Promoter (<=1kb)	19
MAD2L1BP	1.28	0.00146	0.0391	ENSG00000124688.13	ENST00000451025.6	0	CPG_ov	43628956	43629956	7.09	Promoter (<=1kb)	6
KIAA0556	1.28	0.00164	0.0409	ENSG00000047578.12	ENST00000566023.1	0	CPG_ov	27549556	27550556	6.6	Promoter (<=1kb)	16
EBAG9	1.28	0.00168	0.0414	ENSG00000147654.14	ENST00000395785.6	0	CPG_ov	109539184	109540184	7.31	Promoter (<=1kb)	8
IQGAP1	1.28	0.00184	0.0429	ENSG00000140575.12	ENST00000268182.9	0	CPG_ov	90387622	90388622	6.5	Promoter (<=1kb)	15
CAPNS1	1.28	0.00251	0.0486	ENSG00000126247.10	ENST00000246533.7	0	CPG_ov	36139335	36140335	7.02	Promoter (<=1kb)	19
PUF60	1.28	0.00263	0.0498	ENSG00000179950.13	ENST00000526683.5	0	CPG_ov	143828912	143829912	6.48	Promoter (<=1kb)	8
ADTRP	1.27	0.000963	0.0334	ENSG00000111863.12	ENST00000512139.5	-2661	no_CPG	11770465	11771465	5.95	Promoter (2-3kb)	6
AP3M2	1.27	0.00115	0.0359	ENSG00000070718.11	ENST00000518421.5	0	CPG_ov	42152545	42153545	6.73	Promoter (<=1kb)	8
IER2	1.27	0.00141	0.0386	ENSG00000160888.6	ENST00000588173.1	0	CPG_ov	13151343	13152343	6.6	Promoter (<=1kb)	19
C11orf91	1.27	0.00146	0.0391	ENSG00000205177.6	ENST00000379011.4	0	CPG_ov	33700400	33701400	5.34	Promoter (<=1kb)	11
CAP1	1.27	0.00152	0.0397	ENSG00000131236.16	ENST00000372797.7	0	CPG_ov	40040127	40041127	7.35	Promoter (<=1kb)	1
NFASC	1.27	0.00163	0.0409	ENSG00000163531.15	ENST00000404977.6	0	no_CPG	204828098	204829098	5.55	Promoter (<=1kb)	1
BRPF1	1.27	0.00167	0.0414	ENSG00000156983.15	ENST00000433861.6	0	CPG_ov	9730859	9731859	6.65	Promoter (<=1kb)	3
SLC2A8	1.27	0.0017	0.0416	ENSG00000136856.17	ENST00000610552.4	0	CPG_ov	127396525	127397525	7.02	Promoter (<=1kb)	9
DDX3X	1.27	0.0017	0.0416	ENSG00000215301.9	ENST00000610559.4	0	CPG_ov	41333094	41334094	7.25	Promoter (<=1kb)	23
OSBPL11	1.27	0.00173	0.0419	ENSG00000144909.7	ENST00000296220.5	0	CPG_ov	125595009	125596009	7.87	Promoter (<=1kb)	3
GRPEL1	1.27	0.00173	0.042	ENSG00000109519.12	ENST00000264954.4	0	CPG_ov	7067695	7068695	5.9	Promoter (<=1kb)	4
SDHAF4	1.27	0.00177	0.0423	ENSG00000154079.5	ENST00000468640.1	0	CPG_ov	70566426	70567426	5.85	Promoter (<=1kb)	6
SIRT5	1.27	0.00191	0.0436	ENSG00000124523.15	ENST00000397350.6	0	CPG_ov	13574274	13575274	7.27	Promoter (<=1kb)	6
RCAN3	1.27	0.00225	0.0466	ENSG00000117602.11	ENST00000538532.5	0	CPG_ov	24502000	24503000	6.35	Promoter (<=1kb)	1
KATNAL1	1.27	0.00235	0.0475	ENSG00000102781.13	ENST00000380615.7	0	CPG_ov	30306499	30307499	6.62	Promoter (<=1kb)	13
ZC4H2	1.27	0.0025	0.0485	ENSG00000126970.15	ENST00000337990.2	0	CPG_ov	65034529	65035529	6.45	Promoter (<=1kb)	23
MARCH7	1.27	0.00252	0.0486	ENSG00000136536.14	ENST00000539065.5	0	CPG_ov	159711708	159712708	7.37	Promoter (<=1kb)	2
PLAUR	1.26	0.000334	0.0221	ENSG00000011422.11	ENST00000599892.5	-92	CPG_ov	43668412	43669412	6.81	Promoter (<=1kb)	19
PFKFB4	1.26	0.000938	0.0329	ENSG00000114268.11	ENST00000232375.7	0	CPG_ov	48556590	48557590	7.01	Promoter (<=1kb)	3
RAVER1	1.26	0.00107	0.0352	ENSG00000161847.13	ENST00000617231.4	0	CPG_ov	10332876	10333876	6.48	Promoter (<=1kb)	19
DCBLD2	1.26	0.00118	0.0364	ENSG00000057019.15	ENST00000326840.10	0	CPG_ov	98901412	98902412	7.61	Promoter (<=1kb)	3
ERP44	1.26	0.00123	0.037	ENSG00000023318.7	ENST00000262455.6	0	CPG_ov	100098770	100099770	7.55	Promoter (<=1kb)	9
FAM173A	1.26	0.00136	0.0381	ENSG00000103254.9	ENST00000566525.5	0	CPG_ov	719725	720725	5.63	Promoter (<=1kb)	16
SNAP25	1.26	0.00148	0.0392	ENSG00000132639.12	ENST00000254976.6	0	CPG_ov	10218238	10219238	7.06	Promoter (<=1kb)	20
WDR60	1.26	0.00151	0.0395	ENSG00000126870.15	ENST00000407559.7	0	CPG_ov	158855933	158856933	5.96	Promoter (<=1kb)	7
RP11-452D2.2	1.26	0.00172	0.0419	ENSG00000234042.1	ENST00000452635.1	439	no_CPG	63703504	63704504	5.4	Promoter (<=1kb)	9
SMUG1	1.26	0.00202	0.0448	ENSG00000123415.15	ENST00000635234.1	0	no_CPG	54188463	54189463	6.55	Promoter (<=1kb)	12
SLC5A6	1.26	0.00217	0.0459	ENSG00000138074.14	ENST00000310574.7	0	CPG_ov	27211596	27212596	7.5	Promoter (<=1kb)	2
HSF1	1.26	0.00227	0.0467	ENSG00000185122.10	ENST00000400780.8	0	CPG_ov	144291424	144292424	6.19	Promoter (<=1kb)	8
UPK2	1.26	0.00252	0.0487	ENSG00000110375.2	ENST00000534788.1	0	CPG_ov	118924563	118925563	5.25	Promoter (<=1kb)	11
SERPINE2	1.26	0.00257	0.0492	ENSG00000135919.12	ENST00000409304.5	0	CPG_ov	224038968	224039968	5.35	Promoter (<=1kb)	2
PPM1A	1.26	0.00262	0.0498	ENSG00000100614.17	ENST00000395076.8	0	CPG_ov	60248744	60249744	7.11	Promoter (<=1kb)	14
AP000442.4	1.25	0.000441	0.025	ENSG00000255008.2	ENST00000533552.2	0	no_CPG	59565815	59566815	6.35	Promoter (<=1kb)	11
PLCD1	1.25	0.000464	0.0253	ENSG00000187091.13	ENST00000463876.5	0	CPG_ov	38024447	38025447	7.08	Promoter (<=1kb)	3
RP11-284F21.7	1.25	0.000777	0.0306	ENSG00000229953.1	ENST00000448869.1	583	no_CPG	156659841	156660841	6.34	Promoter (<=1kb)	1
ITSN1	1.25	0.00087	0.0321	ENSG00000205726.14	ENST00000399353.5	0	CPG_ov	33641794	33642794	7.38	Promoter (<=1kb)	21
IL4I1	1.25	0.00106	0.035	ENSG00000104951.15	ENST00000601717.5	0	CPG_ov	49929407	49930407	6.68	Promoter (<=1kb)	19
TBC1D25	1.25	0.00114	0.0358	ENSG00000068354.15	ENST00000376771.8	0	CPG_ov	48539107	48540107	6.67	Promoter (<=1kb)	23
BPHL	1.25	0.0012	0.0365	ENSG00000137274.12	ENST00000434640.5	0	CPG_ov	3117954	3118954	5.95	Promoter (<=1kb)	6
SLC35A1	1.25	0.0012	0.0365	ENSG00000164414.16	ENST00000369556.7	0	CPG_ov	87472462	87473462	5.95	Promoter (<=1kb)	6
EFNA5	1.25	0.00127	0.0374	ENSG00000184349.12	ENST00000333274.10	-1272	CPG_ov	107672167	107673167	6.98	Promoter (1-2kb)	5
ABCC10	1.25	0.00135	0.0381	ENSG00000124574.14	ENST00000372515.8	0	CPG_ov	43427185	43428185	6.79	Promoter (<=1kb)	6
RP11-670E13.6	1.25	0.0014	0.0386	ENSG00000274213.1	ENST00000619432.1	245	no_CPG	56914431	56915431	5.54	Promoter (<=1kb)	17
TRIM24	1.25	0.00195	0.044	ENSG00000122779.17	ENST00000343526.8	0	CPG_ov	138459545	138460545	6.77	Promoter (<=1kb)	7
RP11-798K3.2	1.25	0.00206	0.0451	ENSG00000259347.6	ENST00000558071.2	16841	no_CPG	67041412	67042412	6.1	Intron (ENST00000558071.2/ENSG00000259347.6, intron 1 of 4)	15
APBB2	1.25	0.00215	0.0458	ENSG00000163697.16	ENST00000295974.12	0	CPG_ov	41214169	41215169	6.75	Promoter (<=1kb)	4
ZNF557	1.25	0.00227	0.0467	ENSG00000130544.11	ENST00000252840.10	0	no_CPG	7068975	7069975	5.46	Promoter (<=1kb)	19
MIR92B	1.25	0.00228	0.0469	ENSG00000231064.6	ENST00000447623.2	-206	CPG_ov	155193798	155194798	6.41	Promoter (<=1kb)	1
CGRRF1	1.25	0.00243	0.048	ENSG00000100532.11	ENST00000554791.5	0	CPG_ov	54509235	54510235	7.71	Promoter (<=1kb)	14
SNRPD3	1.25	0.00247	0.0483	ENSG00000100028.11	ENST00000215829.7	0	CPG_ov	24554817	24555817	8.01	Promoter (<=1kb)	22
LRIG1	1.24	0.0011	0.0355	ENSG00000144749.13	ENST00000273261.7	0	CPG_ov	66500722	66501722	6.83	Promoter (<=1kb)	3
ADAR	1.24	0.00127	0.0372	ENSG00000160710.15	ENST00000368474.8	0	CPG_ov	154607690	154608690	6.01	Promoter (<=1kb)	1
POLR3E	1.24	0.00136	0.0381	ENSG00000058600.15	ENST00000615879.4	0	CPG_ov	22297048	22298048	6.26	Promoter (<=1kb)	16
TRIM35	1.24	0.00183	0.0429	ENSG00000104228.12	ENST00000305364.8	0	CPG_ov	27310945	27311945	7.69	Promoter (<=1kb)	8
AC004895.4	1.24	0.00191	0.0436	ENSG00000231704.5	ENST00000436915.5	0	CPG_ov	6080943	6081943	7.96	Promoter (<=1kb)	7
NBN	1.24	0.00192	0.0437	ENSG00000104320.13	ENST00000265433.7	0	CPG_ov	89983825	89984825	7.68	Promoter (<=1kb)	8
AC092635.1	1.24	0.0021	0.0454	ENSG00000229370.1	ENST00000434509.1	-228772	no_CPG	13307901	13308901	6.52	Distal Intergenic	2
CTD-2311M21.4	1.24	0.00212	0.0455	ENSG00000274937.1	ENST00000611178.1	-72	CPG_ov	74373606	74374606	6.14	Promoter (<=1kb)	15
REXO1	1.24	0.00221	0.0461	ENSG00000079313.12	ENST00000170168.8	0	CPG_ov	1848143	1849143	5.46	Promoter (<=1kb)	19
SCARF2	1.24	0.00224	0.0464	ENSG00000244486.8	ENST00000622235.4	46	CPG_ov	20436779	20437779	5.72	Promoter (<=1kb)	22
HOXC13	1.24	0.0024	0.0478	ENSG00000123364.4	ENST00000243056.4	0	CPG_ov	53938139	53939139	7.45	Promoter (<=1kb)	12
TOP2B	1.24	0.00251	0.0486	ENSG00000077097.14	ENST00000435706.6	0	CPG_ov	25664484	25665484	6.37	Promoter (<=1kb)	3
AZI2	1.24	0.00254	0.0488	ENSG00000163512.13	ENST00000479665.5	0	CPG_ov	28348506	28349506	7.42	Promoter (<=1kb)	3
NMT1	1.23	0.000648	0.0287	ENSG00000136448.11	ENST00000592782.5	0	CPG_ov	45050991	45051991	6.24	Promoter (<=1kb)	17
AP2A1	1.23	0.000684	0.0292	ENSG00000196961.12	ENST00000354293.9	0	CPG_ov	49766153	49767153	7.57	Promoter (<=1kb)	19
PPM1L	1.23	0.000927	0.0328	ENSG00000163590.13	ENST00000497343.5	0	CPG_ov	160754797	160755797	6.32	Promoter (<=1kb)	3
SFT2D2	1.23	0.00113	0.0357	ENSG00000213064.9	ENST00000471981.1	0	CPG_ov	168225299	168226299	5.82	Promoter (<=1kb)	1
DERA	1.23	0.00165	0.0411	ENSG00000023697.12	ENST00000428559.6	0	CPG_ov	15910831	15911831	6.17	Promoter (<=1kb)	12
G3BP2	1.23	0.00174	0.042	ENSG00000138757.14	ENST00000511868.5	0	CPG_ov	75724052	75725052	7.3	Promoter (<=1kb)	4
HACD2	1.23	0.00193	0.0439	ENSG00000206527.9	ENST00000383657.9	0	CPG_ov	123584614	123585614	7.43	Promoter (<=1kb)	3
HYLS1	1.23	0.00206	0.0451	ENSG00000198331.10	ENST00000526028.1	0	CPG_ov	125887342	125888342	6.61	Promoter (<=1kb)	11
LINC00324	1.23	0.00216	0.0459	ENSG00000178977.3	ENST00000315707.3	1242	CPG_ov	8221801	8222801	6.39	Promoter (1-2kb)	17
AKAP9	1.23	0.00237	0.0477	ENSG00000127914.16	ENST00000356239.7	0	CPG_ov	91940267	91941267	7.14	Promoter (<=1kb)	7
RP11-192P3.4	1.23	0.00237	0.0478	ENSG00000272381.1	ENST00000605929.1	-52963	CPG_ov	31133920	31134920	6.68	Distal Intergenic	10
GABARAP	1.23	0.00241	0.0479	ENSG00000170296.9	ENST00000302386.9	0	CPG_ov	7242071	7243071	5.95	Promoter (<=1kb)	17
AJ003147.9	1.22	0.000724	0.0297	ENSG00000262668.1	ENST00000576468.1	0	no_CPG	3187703	3188703	6.49	Promoter (<=1kb)	16
EIF3A	1.22	0.000922	0.0327	ENSG00000107581.12	ENST00000369144.7	0	CPG_ov	119080423	119081423	6.12	Promoter (<=1kb)	10
STOML1	1.22	0.00119	0.0364	ENSG00000067221.13	ENST00000561656.5	0	no_CPG	73994276	73995276	5.83	Promoter (<=1kb)	15
RASSF1	1.22	0.00126	0.0372	ENSG00000068028.17	ENST00000327761.7	0	CPG_ov	50336983	50337983	6.89	Promoter (<=1kb)	3
BBS9	1.22	0.00134	0.0379	ENSG00000122507.20	ENST00000432983.5	0	CPG_ov	33128863	33129863	7.29	Promoter (<=1kb)	7
POU2F1	1.22	0.00149	0.0394	ENSG00000143190.21	ENST00000367866.6	0	CPG_ov	167220116	167221116	7	Promoter (<=1kb)	1
LIPT2	1.22	0.0018	0.0426	ENSG00000175536.6	ENST00000527115.1	0	CPG_ov	74492713	74493713	6.75	Promoter (<=1kb)	11
EAPP	1.22	0.00183	0.0429	ENSG00000129518.8	ENST00000250454.7	0	CPG_ov	34539170	34540170	5.53	Promoter (<=1kb)	14
SBNO1	1.22	0.00191	0.0436	ENSG00000139697.12	ENST00000267176.8	0	CPG_ov	123364571	123365571	7.21	Promoter (<=1kb)	12
BAZ1B	1.22	0.002	0.0446	ENSG00000009954.10	ENST00000339594.8	0	CPG_ov	73521980	73522980	7.39	Promoter (<=1kb)	7
NLK	1.22	0.00218	0.0459	ENSG00000087095.12	ENST00000583517.1	0	CPG_ov	28041159	28042159	7.39	Promoter (<=1kb)	17
FBXW4	1.22	0.00244	0.048	ENSG00000107829.13	ENST00000331272.7	566	CPG_ov	101693693	101694693	6.09	Promoter (<=1kb)	10
PTPN14	1.22	0.00256	0.049	ENSG00000152104.11	ENST00000491277.1	0	CPG_ov	214551424	214552424	6.45	Promoter (<=1kb)	1
RAD54L	1.21	0.000482	0.0254	ENSG00000085999.11	ENST00000463715.5	0	CPG_ov	46247090	46248090	6.57	Promoter (<=1kb)	1
AFG3L2	1.21	0.000662	0.029	ENSG00000141385.9	ENST00000269143.7	0	CPG_ov	12377134	12378134	7.53	Promoter (<=1kb)	18
CYP20A1	1.21	0.000958	0.0334	ENSG00000119004.15	ENST00000356079.8	0	CPG_ov	203238598	203239598	7.18	Promoter (<=1kb)	2
GLIS2	1.21	0.00121	0.0367	ENSG00000126603.8	ENST00000262366.7	-14900	no_CPG	4298861	4299861	6.51	Distal Intergenic	16
ZNF274	1.21	0.00121	0.0368	ENSG00000171606.17	ENST00000424679.6	0	CPG_ov	58182627	58183627	6.31	Promoter (<=1kb)	19
GFOD2	1.21	0.00133	0.0379	ENSG00000141098.12	ENST00000602377.1	0	CPG_ov	67718908	67719908	6.28	Promoter (<=1kb)	16
TNFRSF1A	1.21	0.00173	0.0419	ENSG00000067182.7	ENST00000437813.7	-1823	no_CPG	6336067	6337067	7.56	Promoter (1-2kb)	12
SF1	1.21	0.00185	0.0429	ENSG00000168066.20	ENST00000377387.5	0	CPG_ov	64778175	64779175	7.4	Promoter (<=1kb)	11
ZNF833P	1.21	0.00208	0.0453	ENSG00000267343.2	ENST00000424938.1	11214	CPG_ov	11693760	11694760	5.34	Distal Intergenic	19
ZNF611	1.21	0.00221	0.0461	ENSG00000213020.8	ENST00000595001.5	0	CPG_ov	52734520	52735520	5.68	Promoter (<=1kb)	19
RN7SL815P	1.21	0.00242	0.0479	ENSG00000243359.3	ENST00000470970.3	-53110	CPG_ov	115783760	115784760	6.85	Distal Intergenic	3
C5orf45	1.21	0.00245	0.0482	ENSG00000161010.14	ENST00000522663.5	0	CPG_ov	179858300	179859300	6.75	Promoter (<=1kb)	5
SLC1A5	1.21	0.0025	0.0486	ENSG00000105281.12	ENST00000542575.6	0	CPG_ov	46788160	46789160	6.95	Promoter (<=1kb)	19
STX5	1.2	0.00141	0.0386	ENSG00000162236.11	ENST00000377897.8	0	CPG_ov	62831632	62832632	6.96	Promoter (<=1kb)	11
CCDC137	1.2	0.00163	0.0409	ENSG00000185298.12	ENST00000329214.12	0	CPG_ov	81666017	81667017	6.27	Promoter (<=1kb)	17
Y_RNA	1.2	0.00163	0.0409	ENSG00000222412.1	ENST00000410480.1	-3610	CPG_ov	31759746	31760746	7.59	Distal Intergenic	10
MOCS2	1.2	0.00174	0.042	ENSG00000164172.18	ENST00000361377.8	0	CPG_ov	53109211	53110211	6.1	Promoter (<=1kb)	5
PPFIBP1	1.2	0.00202	0.0448	ENSG00000110841.13	ENST00000545381.5	0	no_CPG	27523588	27524588	6.87	Promoter (<=1kb)	12
XPO1	1.2	0.00216	0.0459	ENSG00000082898.16	ENST00000401558.6	0	CPG_ov	61537785	61538785	7.63	Promoter (<=1kb)	2
RRAGC	1.2	0.00217	0.0459	ENSG00000116954.7	ENST00000373001.3	0	CPG_ov	38859394	38860394	6.56	Promoter (<=1kb)	1
LPCAT3	1.2	0.00218	0.0459	ENSG00000111684.10	ENST00000535479.5	0	CPG_ov	7018280	7019280	7.45	Promoter (<=1kb)	12
RP11-706O15.1	1.2	0.00248	0.0484	ENSG00000205664.10	ENST00000461011.5	7199	CPG_ov	3814372	3815372	5.76	Downstream (2-3kb)	23
CCDC61	1.19	0.000658	0.0289	ENSG00000104983.8	ENST00000536603.5	0	no_CPG	45994670	45995670	7.18	Promoter (<=1kb)	19
NFYC	1.19	0.00116	0.0361	ENSG00000066136.20	ENST00000467203.5	0	CPG_ov	40691491	40692491	7.26	Promoter (<=1kb)	1
DIXDC1	1.19	0.00134	0.0379	ENSG00000150764.13	ENST00000529225.5	0	CPG_ov	111926506	111927506	6.62	Promoter (<=1kb)	11
LINC01144	1.19	0.00154	0.0399	ENSG00000281912.1	ENST00000626198.1	0	CPG_ov	45303164	45304164	7.38	Promoter (<=1kb)	1
LMBRD1	1.19	0.00194	0.0439	ENSG00000168216.10	ENST00000370577.7	0	CPG_ov	69796413	69797413	6.82	Promoter (<=1kb)	6
SPG21	1.19	0.00206	0.045	ENSG00000090487.10	ENST00000204566.6	0	CPG_ov	64989549	64990549	6.59	Promoter (<=1kb)	15
SNX27	1.19	0.00233	0.0473	ENSG00000143376.12	ENST00000368841.6	0	CPG_ov	151611575	151612575	6.4	Promoter (<=1kb)	1
CTNNBIP1	1.18	0.000325	0.0217	ENSG00000178585.14	ENST00000377263.5	0	CPG_ov	9910139	9911139	6.34	Promoter (<=1kb)	1
LINS1	1.18	0.000914	0.0326	ENSG00000140471.16	ENST00000314742.12	0	CPG_ov	100601890	100602890	7.23	Promoter (<=1kb)	15
STARD9	1.18	0.000949	0.0332	ENSG00000159433.11	ENST00000564158.5	0	CPG_ov	42574934	42575934	7.08	Promoter (<=1kb)	15
BCL2L12	1.18	0.00151	0.0396	ENSG00000126453.9	ENST00000441864.6	0	CPG_ov	49665500	49666500	6.06	Promoter (<=1kb)	19
PTCD1	1.18	0.00165	0.0411	ENSG00000106246.17	ENST00000292478.8	0	CPG_ov	99438508	99439508	6.96	Promoter (<=1kb)	7
LGALS1	1.18	0.0017	0.0416	ENSG00000100097.11	ENST00000480207.5	0	no_CPG	37675681	37676681	6.62	Promoter (<=1kb)	22
USP36	1.18	0.0019	0.0436	ENSG00000055483.19	ENST00000589225.5	0	CPG_ov	78840477	78841477	6.99	Promoter (<=1kb)	17
ZNF808	1.18	0.002	0.0446	ENSG00000198482.10	ENST00000487863.5	0	CPG_ov	52527018	52528018	6.31	Promoter (<=1kb)	19
MEIG1	1.18	0.0021	0.0454	ENSG00000197889.9	ENST00000407572.5	0	CPG_ov	14958983	14959983	7.36	Promoter (<=1kb)	10
PPP1R15A	1.18	0.00215	0.0458	ENSG00000087074.7	ENST00000200453.5	236	CPG_ov	48872628	48873628	6.31	Promoter (<=1kb)	19
BDNF	1.17	0.000693	0.0292	ENSG00000176697.18	ENST00000395986.6	0	no_CPG	27698673	27699673	6.7	Promoter (<=1kb)	11
KIAA0895L	1.17	0.00117	0.0361	ENSG00000196123.12	ENST00000561621.5	0	CPG_ov	67183251	67184251	7.24	Promoter (<=1kb)	16
TTL	1.17	0.00128	0.0374	ENSG00000114999.7	ENST00000233336.6	0	CPG_ov	112481161	112482161	6.57	Promoter (<=1kb)	2
RALY	1.17	0.00145	0.039	ENSG00000125970.11	ENST00000375114.7	0	CPG_ov	33992982	33993982	7.39	Promoter (<=1kb)	20
U2AF2	1.17	0.00172	0.0418	ENSG00000063244.12	ENST00000308924.8	0	CPG_ov	55654208	55655208	6.16	Promoter (<=1kb)	19
PRMT1	1.17	0.00174	0.042	ENSG00000126457.21	ENST00000534465.6	0	CPG_ov	49676513	49677513	7.68	Promoter (<=1kb)	19
SPAG5	1.17	0.00177	0.0423	ENSG00000076382.16	ENST00000321765.9	0	CPG_ov	28598734	28599734	6.83	Promoter (<=1kb)	17
GPC1	1.17	0.00223	0.0464	ENSG00000063660.8	ENST00000264039.6	-646	CPG_ov	240434025	240435025	6.27	Promoter (<=1kb)	2
ITGA9-AS1	1.17	0.00233	0.0472	ENSG00000235257.8	ENST00000630589.2	0	CPG_ov	37860098	37861098	5.91	Promoter (<=1kb)	3
RPL12P42	1.17	0.0024	0.0478	ENSG00000213253.5	ENST00000481802.1	-3729	CPG_ov	13162517	13163517	5.61	Distal Intergenic	19
TP53I13	1.17	0.00241	0.0479	ENSG00000167543.15	ENST00000580183.6	0	CPG_ov	29567912	29568912	6.48	Promoter (<=1kb)	17
Y_RNA	1.16	0.000635	0.0283	ENSG00000201075.2	ENST00000364205.2	10098	CPG_ov	14285606	14286606	6.84	Distal Intergenic	16
ASXL2	1.16	0.000842	0.0316	ENSG00000143970.16	ENST00000435504.8	0	CPG_ov	25878074	25879074	7.49	Promoter (<=1kb)	2
UBIAD1	1.16	0.00197	0.0442	ENSG00000120942.13	ENST00000376810.5	0	CPG_ov	11272831	11273831	6.03	Promoter (<=1kb)	1
SLFN5	1.16	0.00199	0.0445	ENSG00000166750.9	ENST00000299977.8	0	CPG_ov	35242995	35243995	5.54	Promoter (<=1kb)	17
C19orf33	1.16	0.00229	0.047	ENSG00000167644.11	ENST00000301246.9	0	no_CPG	38304011	38305011	6.08	Promoter (<=1kb)	19
G6PC3	1.16	0.00232	0.0471	ENSG00000141349.8	ENST00000269097.8	0	CPG_ov	44070277	44071277	6.91	Promoter (<=1kb)	17
PRR14	1.16	0.00237	0.0477	ENSG00000156858.11	ENST00000563399.5	0	CPG_ov	30650274	30651274	6.59	Promoter (<=1kb)	16
LINC00471	1.15	0.000538	0.0266	ENSG00000181798.2	ENST00000313064.2	0	CPG_ov	231513971	231514971	6.52	Promoter (<=1kb)	2
NIPAL1	1.15	0.00125	0.0371	ENSG00000163293.11	ENST00000500571.2	0	CPG_ov	47914182	47915182	7.2	Promoter (<=1kb)	4
HOXB7	1.15	0.0016	0.0405	ENSG00000260027.4	ENST00000239165.8	0	CPG_ov	48610314	48611314	5.93	Promoter (<=1kb)	17
CHMP7	1.15	0.00174	0.042	ENSG00000147457.13	ENST00000519414.5	0	CPG_ov	23246208	23247208	6.64	Promoter (<=1kb)	8
FAM162A	1.15	0.00177	0.0423	ENSG00000114023.15	ENST00000232125.9	0	CPG_ov	122383578	122384578	7.1	Promoter (<=1kb)	3
FXR2	1.15	0.00203	0.0448	ENSG00000129245.11	ENST00000250113.11	0	CPG_ov	7614631	7615631	7.14	Promoter (<=1kb)	17
NUP93	1.15	0.00207	0.0453	ENSG00000102900.12	ENST00000308159.9	0	CPG_ov	56729543	56730543	6.19	Promoter (<=1kb)	16
FAM208A	1.15	0.0021	0.0454	ENSG00000163946.13	ENST00000493960.6	0	CPG_ov	56682379	56683379	6.37	Promoter (<=1kb)	3
UBP1	1.15	0.00224	0.0464	ENSG00000153560.11	ENST00000283629.7	0	CPG_ov	33440028	33441028	7.77	Promoter (<=1kb)	3
ESRRA	1.15	0.0024	0.0479	ENSG00000173153.13	ENST00000406310.5	-5	CPG_ov	64304567	64305567	6.93	Promoter (<=1kb)	11
C16orf72	1.15	0.00246	0.0483	ENSG00000182831.11	ENST00000327827.11	0	CPG_ov	9090811	9091811	7.2	Promoter (<=1kb)	16
CAPRIN2	1.15	0.00254	0.0488	ENSG00000110888.17	ENST00000298892.9	0	CPG_ov	30754505	30755505	6.62	Promoter (<=1kb)	12
TFE3	1.14	0.00161	0.0406	ENSG00000068323.16	ENST00000493583.5	0	CPG_ov	49043072	49044072	7.27	Promoter (<=1kb)	23
ZNF696	1.14	0.00215	0.0458	ENSG00000185730.7	ENST00000330143.7	0	CPG_ov	143290997	143291997	6.42	Promoter (<=1kb)	8
RP11-14I17.3	1.14	0.00232	0.0471	ENSG00000254362.1	ENST00000518031.1	9579	CPG_ov	26450070	26451070	5.55	Intron (ENST00000523949.5/ENSG00000104765.15, intron 5 of 5)	8
NCL	1.14	0.00257	0.0491	ENSG00000115053.15	ENST00000322723.8	0	CPG_ov	231464140	231465140	7.24	Promoter (<=1kb)	2
MYL12A	1.13	0.000476	0.0254	ENSG00000101608.12	ENST00000579226.5	0	CPG_ov	3246828	3247828	7.73	Promoter (<=1kb)	18
YWHAQ	1.13	0.0016	0.0405	ENSG00000134308.13	ENST00000381844.8	0	CPG_ov	9630614	9631614	7.08	Promoter (<=1kb)	2
DACT3	1.13	0.00177	0.0423	ENSG00000197380.10	ENST00000391916.6	0	CPG_ov	46660849	46661849	7.13	Promoter (<=1kb)	19
AAAS	1.13	0.00247	0.0484	ENSG00000094914.12	ENST00000209873.8	0	CPG_ov	53320894	53321894	6.99	Promoter (<=1kb)	12
B4GALT4	1.12	0.000493	0.0258	ENSG00000121578.12	ENST00000467604.5	0	CPG_ov	119240718	119241718	6.74	Promoter (<=1kb)	3
MICU1	1.12	0.000807	0.0312	ENSG00000107745.17	ENST00000398761.8	0	CPG_ov	72625698	72626698	6.84	Promoter (<=1kb)	10
EIF5A2	1.12	0.00125	0.0371	ENSG00000163577.7	ENST00000295822.6	0	CPG_ov	170908194	170909194	6.9	Promoter (<=1kb)	3
ERGIC3	1.12	0.00129	0.0375	ENSG00000125991.18	ENST00000348547.6	0	CPG_ov	35541603	35542603	6.38	Promoter (<=1kb)	20
SPTBN1	1.12	0.00155	0.0399	ENSG00000115306.15	ENST00000333896.5	0	CPG_ov	54558239	54559239	6.09	Promoter (<=1kb)	2
ZNF326	1.12	0.0021	0.0454	ENSG00000162664.16	ENST00000394583.7	0	CPG_ov	89994511	89995511	6.85	Promoter (<=1kb)	1
RP11-395N3.2	1.12	0.00225	0.0465	ENSG00000272622.1	ENST00000607970.1	0	CPG_ov	226799828	226800828	5.79	Promoter (<=1kb)	2
RAD21	1.12	0.00237	0.0477	ENSG00000164754.13	ENST00000297338.6	0	CPG_ov	116874269	116875269	7.08	Promoter (<=1kb)	8
PSMB10	1.12	0.00252	0.0486	ENSG00000205220.11	ENST00000570985.1	0	CPG_ov	67935357	67936357	6.47	Promoter (<=1kb)	16
ZCWPW1	1.11	0.0013	0.0376	ENSG00000078487.17	ENST00000464510.5	0	CPG_ov	100428752	100429752	7.87	Promoter (<=1kb)	7
ZNF428	1.11	0.00197	0.0443	ENSG00000131116.11	ENST00000300811.7	0	CPG_ov	43619150	43620150	6.86	Promoter (<=1kb)	19
CNNM2	1.1	0.00218	0.0459	ENSG00000148842.17	ENST00000369878.8	0	CPG_ov	102917648	102918648	7.12	Promoter (<=1kb)	10
RAB10	1.1	0.00236	0.0476	ENSG00000084733.10	ENST00000495146.5	0	CPG_ov	26033374	26034374	7.72	Promoter (<=1kb)	2
ELP6	1.09	0.00123	0.037	ENSG00000163832.15	ENST00000296149.8	0	CPG_ov	47512980	47513980	6.54	Promoter (<=1kb)	3
EED	1.09	0.00203	0.0448	ENSG00000074266.18	ENST00000263360.10	0	CPG_ov	86244355	86245355	6.41	Promoter (<=1kb)	11
GNAI2	1.09	0.00258	0.0492	ENSG00000114353.16	ENST00000313601.10	0	CPG_ov	50235498	50236498	6.8	Promoter (<=1kb)	3
TBPL1	1.08	0.00254	0.0488	ENSG00000028839.9	ENST00000367871.5	0	CPG_ov	133952485	133953485	6.79	Promoter (<=1kb)	6
PIK3R2	1.06	0.00132	0.0378	ENSG00000105647.15	ENST00000222254.12	0	CPG_ov	18152404	18153404	6.15	Promoter (<=1kb)	19
TBL2	1.06	0.00214	0.0458	ENSG00000106638.15	ENST00000305632.9	0	CPG_ov	73578141	73579141	6.51	Promoter (<=1kb)	7
KMT5C	1.05	0.00103	0.0347	ENSG00000133247.13	ENST00000589338.5	0	CPG_ov	55338929	55339929	7.56	Promoter (<=1kb)	19
CHD3	1.05	0.0019	0.0436	ENSG00000170004.16	ENST00000358181.8	-602	no_CPG	7887189	7888189	6.08	Promoter (<=1kb)	17
FBRS	1.04	0.000539	0.0266	ENSG00000156860.15	ENST00000356166.10	0	CPG_ov	30657777	30658777	7.4	Promoter (<=1kb)	16
SKP2	1.04	0.00168	0.0415	ENSG00000145604.15	ENST00000274254.9	0	CPG_ov	36151504	36152504	7.17	Promoter (<=1kb)	5
C4orf19	1.04	0.0023	0.047	ENSG00000154274.14	ENST00000381980.8	-106	CPG_ov	37452835	37453835	6.34	Promoter (<=1kb)	4
FAF2	1.03	0.00123	0.037	ENSG00000113194.12	ENST00000261942.6	0	CPG_ov	176447709	176448709	6.56	Promoter (<=1kb)	5
LETM2	1.02	0.00178	0.0424	ENSG00000165046.12	ENST00000527334.5	0	CPG_ov	38385928	38386928	6.18	Promoter (<=1kb)	8
ASNS	1.02	0.00214	0.0458	ENSG00000070669.16	ENST00000175506.8	0	CPG_ov	97872028	97873028	6.96	Promoter (<=1kb)	7
RNF19B	1.01	0.00177	0.0423	ENSG00000116514.16	ENST00000373456.11	0	CPG_ov	32964267	32965267	6.02	Promoter (<=1kb)	1
BLVRB	1.01	0.00253	0.0488	ENSG00000090013.9	ENST00000595483.5	0	CPG_ov	40465429	40466429	6.37	Promoter (<=1kb)	19
EPT1	1	0.00188	0.0433	ENSG00000138018.17	ENST00000613142.4	0	CPG_ov	26345537	26346537	7.13	Promoter (<=1kb)	2
CTC-338M12.2	0.99	0.0022	0.046	ENSG00000248473.1	ENST00000513771.1	0	CPG_ov	181191248	181192248	6.16	Promoter (<=1kb)	5
LINC01518	0.99	0.00246	0.0483	ENSG00000233515.1	ENST00000411439.1	0	no_CPG	42690988	42691988	7.11	Promoter (<=1kb)	10
FAM160A2	0.97	0.00112	0.0356	ENSG00000051009.10	ENST00000449352.6	0	CPG_ov	6234308	6235308	6.96	Promoter (<=1kb)	11
PTGES3	0.96	0.00214	0.0458	ENSG00000110958.15	ENST00000537473.2	0	CPG_ov	56687966	56688966	6.76	Promoter (<=1kb)	12
CHMP5	0.95	0.00263	0.0498	ENSG00000086065.13	ENST00000419016.6	0	CPG_ov	33264386	33265386	6.61	Promoter (<=1kb)	9
