# Supplementary material for: R-loop proximity proteomics identifies a role of DDX41 in transcription-associated genomic instability
Source: Research Square preprint supplement (doi:10.21203/rs.3.rs-337351/v1), 2021-04-26
Supplement: Supplementary file 2 [file 49e8c3736d064b3ba87477c5.xlsx]

## Sheet: RDProx
Gene names	mean log2(HBD/HBD-WKK)	FDR	Protein IDs	Protein names	# of peptides	log2(HBD/HBD-WKK) exp1	log2(HBD/HBD-WKK) exp2	log2(HBD/HBD-WKK) exp3	Count
ERH	3.91069	9.88316e-05	G3V279;P84090	Enhancer of rudimentary homolog	2	4.01024	3.54597	4.17584	3
SRSF2	3.19672	9.88316e-05	J3QL05;J3KP15;Q01130-2;Q01130;Q9BRL6-2;Q9BRL6	Serine/arginine-rich splicing factor 2	8	3.13437	3.10402	3.35177	3
DDX39B	3.11213	0.000127194	Q13838;Q13838-2;Q5STU3;A0A0G2JJZ9;F6WLT2;A0A140T9X3;A0A140T996;A0A0A0MT12;F6TRA5;A0A140T9X9;F6S4E6;F6UJC5;A0A140TA18;A0A140T973;A0A140T9K1;F6R6M7;A0A140T9L4;F6QYI9;A0A0G2JJL7;H0Y400;H0YCC6;A0A140T9K2;A0A140T9N3;A0A0G2JHN7;F6U6E2;F6S2B7	Spliceosome RNA helicase DDX39B	28	3.09204	2.71042	3.53394	3
CTNNBL1	3.02622	0.000673985	A0A087WUB9;Q8WYA6;Q8WYA6-4;Q8WYA6-3;Q8WYA6-2;A2A2P1	Beta-catenin-like protein 1	8	2.58378	2.59531	3.89956	3
ANP32E	3.02609	0.000434361	Q9BTT0;E9PPH5;Q9BTT0-3;Q5TB19;E9PLC4;Q9BTT0-2;E9PI45;Q5TB25	Acidic leucine-rich nuclear phosphoprotein 32 family member E	6	3.30141	2.27172	3.50513	3
API5	3.01805	0.000119089	Q9BZZ5-2;G3V1C3;Q9BZZ5-3;Q9BZZ5;Q9BZZ5-6;Q9BZZ5-5;Q9BZZ5-1;H0YER7;E9PQK6	Apoptosis inhibitor 5	24	3.07421	2.61662	3.36331	3
TRA2B	3.01767	9.88316e-05	P62995-3;P62995;H7C2L4;H7BXF3	Transformer-2 protein homolog beta	9	2.76746	2.99978	3.28577	3
DKC1	3.01283	9.88509e-05	O60832;O60832-2;C9IYT0;H7BZF2;H7C0M1;H7C2Q2	H/ACA ribonucleoprotein complex subunit 4	6	3.22005	2.62604	3.1924	3
EBNA1BP2	2.99676	0.000147079	H7C2Q8;Q99848	Probable rRNA-processing protein EBP2	6	2.84864	2.65519	3.48646	3
PABPN1	2.97543	0.000270728	Q86U42-2;Q86U42;Q92843-2;H0YJH9;A6NDY0-2;A6NDY0;A6NDY0-4	Polyadenylate-binding protein 2	11	2.73961	2.57833	3.60834	3
SNRPA	2.95996	9.88316e-05	P09012;M0R268;M0QZG7;M0R221;M0R2B8;M0R0G9;M0QXK2	U1 small nuclear ribonucleoprotein A	7	2.96571	2.76899	3.14517	3
NGDN	2.95557	0.000210177	Q8NEJ9-2;Q8NEJ9;G3V4G1	Neuroguidin	2	3.06552	NA	2.84561	2
SRSF7	2.95335	9.88316e-05	A0A0B4J1Z1;C9JAB2;Q16629-3;Q16629-2;Q16629-4;Q16629;F8WEA1	Serine/arginine-rich splicing factor 7	10	2.84205	2.75918	3.25882	3
RBM39	2.94619	9.88316e-05	Q14498-3;Q14498-2;Q14498;G3XAC6;A0A0U1RQH7;H0Y4X3;A0A0U1RQW2;Q5QP23;Q5QP22;Q86U06-3;Q86U06-4;Q86U06-5;Q86U06-2;Q86U06;F8WF24;F2Z3E6;F2Z2Z5;A0A087X122;F8WF73;A8MYG5;G3V546;G3V5Z6;H0YJJ3;G3XAP0	RNA-binding protein 39	16	2.89482	2.84467	3.09909	3
SUPT16H	2.93549	0.00151361	Q9Y5B9;G3V5A4;G3V401;G3V2X0	FACT complex subunit SPT16	19	2.01557	2.9454	3.84549	3
ANP32A	2.93377	9.88316e-05	H0YN26;P39687;H7BZ09;O95626;O43423	Acidic leucine-rich nuclear phosphoprotein 32 family member A	12	3.16248	2.57073	3.0681	3
HNRNPC	2.92618	9.88316e-05	B4DY08;G3V4W0;B2R5W2;P07910-2;G3V4C1;P07910-4;P07910-3;G3V2D6;G3V251;G3V5V7;G3V5X6;G3V3K6;B4DSU6;P0DMR1;B7ZW38;A0A0G2JPF8;A0A0G2JNQ3;O60812;B2RXH8;G3V4M8;G3V2H6;E5RG71;B3KT61;Q86SE5;Q86SE5-3	Heterogeneous nuclear ribonucleoproteins C1/C2	25	2.79608	2.82902	3.15343	3
NCL	2.92376	9.88316e-05	P19338;H7BY16;C9JYW2;C9JLB1;C9J1H7;C9JWL1	Nucleolin	43	2.86521	2.69926	3.2068	3
CDC5L	2.91993	9.88316e-05	Q99459	Cell division cycle 5-like protein	38	2.91094	2.86987	2.97898	3
SF3A1	2.91725	9.88316e-05	Q15459;Q15459-2;F8WB66;H7C1L2;F8WC79	Splicing factor 3A subunit 1	36	2.91365	2.67245	3.16567	3
DNAJC8	2.88427	9.88316e-05	O75937;S4R3J5	DnaJ homolog subfamily C member 8	10	2.9728	2.79546	2.88454	3
DDX27	2.87903	9.88316e-05	B7Z6D5;Q96GQ7;A0A087X059;A0A087WYH5	Probable ATP-dependent RNA helicase DDX27	14	2.60789	2.86942	3.15979	3
TRA2A	2.86398	9.88509e-05	Q13595-4;Q13595-3;Q13595;Q13595-2	Transformer-2 protein homolog alpha	6	2.52882	2.92985	3.13328	3
HNRNPC	2.8611	0.000357871	P07910;G3V2Q1;G3V576;G3V555;G3V575	Heterogeneous nuclear ribonucleoproteins C1/C2	24	NA	3.06019	2.66202	2
WBP4	2.83567	0.000257276	O75554-2;O75554	WW domain-binding protein 4	4	3.12401	2.24385	3.13914	3
PLRG1	2.8329	0.000139296	O43660;O43660-2;D6RA26;H0YA24;B7Z982;H0YAA2	Pleiotropic regulator 1	13	2.91598	2.41059	3.17214	3
FOXH1;XRCC1	2.82806	0.000206562	F5H8D7;P18887;M0QZ96;M0R0D2;M0R1U8;M0QYS5	DNA repair protein XRCC1	5	2.76188	2.89424	NA	2
HNRNPA1;HNRNPA1L2	2.82745	9.88316e-05	F8W6I7;P09651-2;P09651;P09651-3;F8VZ49;F8VTQ5;Q32P51;H0YH80;F8VYN5;F8W646	Heterogeneous nuclear ribonucleoprotein A1;Heterogeneous nuclear ribonucleoprotein A1, N-terminally processed;Heterogeneous nuclear ribonucleoprotein A1-like 2	31	2.84601	2.74986	2.88647	3
DDX39A	2.81728	9.88316e-05	O00148;O00148-2;K7EQN7;O00148-3;K7EPJ3;K7EN69;K7ENP6;K7EL56;K7EIL8;F6SXL5	ATP-dependent RNA helicase DDX39A	19	3.10409	2.79815	2.5496	3
SART1	2.80944	9.88316e-05	O43290;E9PQI8	U4/U6.U5 tri-snRNP-associated protein 1	34	2.99313	2.51266	2.92254	3
FAM50A	2.80227	0.000503118	Q14320;B0S8I6;Q9Y247	Protein FAM50A	15	3.1564	2.07128	3.17913	3
HMGB1;HMGB1P1	2.79931	9.88316e-05	P09429;Q5T7C4;B2RPK0;P23497	High mobility group protein B1;Putative high mobility group protein B1-like 1	10	2.78846	2.72655	2.88294	3
CSTF3	2.79747	9.88316e-05	Q12996;E9PLP8;H0YE74;Q12996-2;E9PJ06;Q12996-3	Cleavage stimulation factor subunit 3	15	2.83986	2.72061	2.83196	3
RPRD1B	2.78921	9.88316e-05	Q9NQG5;A2A2M0;E9PIQ9;A0A087X2D2;A0A087WUK3;E9PQF3	Regulation of nuclear pre-mRNA domain-containing protein 1B	12	2.64455	2.63115	3.09192	3
HNRNPAB	2.77841	9.88509e-05	Q99729-3;D6R9P3;D6RD18;D6RBZ0;A0A087WZV1;Q99729-2;Q99729-4;Q99729	Heterogeneous nuclear ribonucleoprotein A/B	21	3.03224	2.45867	2.84431	3
SF3B2	2.7768	9.88316e-05	A0A087WZZ5;Q13435;E9PPJ0;H0YCG1;E9PJ04;E9PJT3;H0YEX5;E9PIL8	Splicing factor 3B subunit 2	46	2.72934	2.62814	2.97291	3
DDX42	2.76356	9.88316e-05	Q86XP3;A0A0A0MSJ0;Q86XP3-2;J3QRI2;J3KTK9;J3KRE3	ATP-dependent RNA helicase DDX42	32	2.75837	2.57245	2.95986	3
SMARCE1	2.76236	0.000728449	B4DGM3;Q969G3-6;Q969G3-5;Q969G3-3;Q969G3-2;Q969G3-4;Q969G3;J3QKS7;K7EMQ8;H7C048;J3KT85;J3QR61	SWI/SNF-related matrix-associated actin-dependent regulator of chromatin subfamily E member 1	10	3.22308	3.10626	1.95773	3
SRSF1	2.76117	9.88316e-05	J3KTL2;Q07955;Q07955-3;Q07955-2;J3KSR8;J3QQV5;J3KSW7	Serine/arginine-rich splicing factor 1	17	2.8933	2.46801	2.9222	3
ILF2	2.75981	9.88316e-05	B4DY09;Q12905;X6R6Z1;A0A0A0MRL0	Interleukin enhancer-binding factor 2	19	2.78614	2.47884	3.01446	3
DCPS	2.75977	0.000387445	Q96C86	m7GpppX diphosphatase	3	2.56504	NA	2.95449	2
BRD2	2.75394	0.00035981	A0A0G2JK44;P25440;P25440-2;H0Y6K2;A0A140T9E9;U3KQA6;A0A0G2JHL0;A0A140T9V2;P25440-3;A0A140T9F7;P25440-4;E9PIQ3;H0Y799;A0A140T9X8;A0A0G2JHN8;A0A140T9I1;E9PKQ9;H0YDJ7;U3KPW0	Bromodomain-containing protein 2	16	2.50904	2.36253	3.39025	3
RBM26	2.7526	9.88316e-05	Q5T8P6-2;Q5T8P6-3;Q5T8P6;A0A087X0H9;Q5T8P6-5;Q5T8P6-4;E2PSN0;Q5T8P6-6	RNA-binding protein 26	39	2.87556	2.44737	2.93486	3
PPP1R10	2.73963	0.000119089	Q96QC0	Serine/threonine-protein phosphatase 1 regulatory subunit 10	8	2.85736	2.37061	2.9909	3
PQBP1	2.73825	9.88316e-05	O60828-2;O60828;O60828-5;O60828-4;H7C053;C9JQA1;O60828-6;O60828-3;O60828-10;O60828-9;O60828-8;O60828-7	Polyglutamine-binding protein 1	6	2.70669	2.69147	2.8166	3
CWC15	2.72768	0.000209599	Q9P013	Spliceosome-associated protein CWC15 homolog	4	2.70691	NA	2.74846	2
NUDT21	2.72731	0.000140513	O43809;H3BND3;H3BV41	Cleavage and polyadenylation specificity factor subunit 5	9	2.51911	2.50688	3.15594	3
THRAP3	2.71887	9.88316e-05	Q9Y2W1	Thyroid hormone receptor-associated protein 3	45	2.8278	2.54486	2.78396	3
HNRNPU	2.70931	0.000107619	Q00839;Q5RI18	Heterogeneous nuclear ribonucleoprotein U	49	2.37723	2.9381	2.8126	3
SAE1	2.70783	9.88316e-05	Q9UBE0;M0QZS6;B3KNJ4;Q9UBE0-2;Q9UBE0-3;M0QX65;M0R054;M0QYM8;M0R375;M0R286	SUMO-activating enzyme subunit 1;SUMO-activating enzyme subunit 1, N-terminally processed	9	2.5282	2.90095	2.69435	3
CCAR1	2.70704	9.88316e-05	Q8IX12-2;Q8IX12;A0A0C4DGG8;F5H2E6;F5H3E1;F5H1H2;F5H7M9	Cell division cycle and apoptosis regulator protein 1	12	2.61995	2.61758	2.8836	3
PRPF6	2.70599	9.88316e-05	O94906;O94906-2	Pre-mRNA-processing factor 6	21	2.59515	2.79496	2.72786	3
SF3B1	2.70503	9.88316e-05	O75533;H7C341;B4DGZ4;O75533-2;F8WC19	Splicing factor 3B subunit 1	66	2.65125	2.70669	2.75717	3
HNRNPA0	2.69253	9.88316e-05	Q13151	Heterogeneous nuclear ribonucleoprotein A0	14	2.62075	2.7569	2.69995	3
	2.68918	9.88316e-05	A0A0C4DG89		32	2.65155	2.45457	2.96144	3
WBP11	2.68608	9.88316e-05	Q9Y2W2;F5H5G4;F5GXS9	WW domain-binding protein 11	14	2.51369	2.6799	2.86465	3
PSME3	2.68562	9.88316e-05	K9J957;P61289;P61289-2;P61289-3;A0A087WTV2;K7ENH2;K7ESG5;B3KQ25;B7Z8D3;K7EMD0;K7EPX6;K7EKR3;K7EJF8	Proteasome activator complex subunit 3	11	2.94338	2.42618	2.68728	3
TOP1	2.68368	9.88316e-05	P11387;Q969P6-2;Q969P6;E5RIC7;E5RJ95;E5RFS0;E5RJ33;H0YBR3;H0YAR3;H0YC03;E5RGE7;E5RGR4;E5RFE3;E5RGR2	DNA topoisomerase 1	26	2.39791	2.75913	2.89398	3
ALYREF	2.68104	0.00104434	Q86V81;E9PB61	THO complex subunit 4	6	2.58662	1.98309	3.4734	3
MCM2	2.67646	9.88316e-05	P49736;H0Y8E6;F8WDM3	DNA replication licensing factor MCM2	30	2.39531	2.78402	2.85006	3
HP1BP3	2.67625	9.88316e-05	X6RGJ2;Q5SSJ5;B0QZK4;Q5SSJ5-3;Q5SSJ5-2;Q5SWC8;B0QZK9;B0QZK8;Q5SSJ5-5	Heterochromatin protein 1-binding protein 3	4	2.39975	2.8243	2.80469	3
DDX18	2.66556	0.000421869	Q9NVP1;H7C452	ATP-dependent RNA helicase DDX18	6	2.1159	3.24314	2.63766	3
TERF2IP	2.66339	0.00100346	Q9NYB0	Telomeric repeat-binding factor 2-interacting protein 1	6	3.00004	NA	2.32674	2
MFAP1	2.66172	9.88316e-05	P55081	Microfibrillar-associated protein 1	8	2.88069	2.46686	2.63761	3
SFPQ	2.65542	9.88316e-05	P23246;P23246-2;H0Y9K7;H0Y9U2	Splicing factor, proline- and glutamine-rich	49	2.67134	2.53747	2.75745	3
MCM6	2.65449	9.88316e-05	Q14566	DNA replication licensing factor MCM6	30	2.47801	2.65938	2.82607	3
HNRNPK	2.64879	9.88316e-05	P61978-3;Q5T6W2	Heterogeneous nuclear ribonucleoprotein K	37	2.41506	2.90389	2.62742	3
CPSF1	2.64638	9.88316e-05	Q10570;A0A087X101;E9PIM1	Cleavage and polyadenylation specificity factor subunit 1	21	2.46024	2.54809	2.93081	3
CTDSPL2	2.64408	0.000107744	Q05D32-2;Q05D32;H0YMH7;H0YNU2;H0YNW9	CTD small phosphatase-like protein 2	3	2.69006	2.33899	2.90317	3
CD2BP2	2.64341	9.88316e-05	O95400	CD2 antigen cytoplasmic tail-binding protein 2	7	2.46832	2.60945	2.85246	3
RALY	2.63749	9.88316e-05	Q5QPL9;Q9UKM9-2;Q9UKM9;Q5QPM2;Q5QPM0;Q5QPM1	RNA-binding protein Raly	3	2.80989	2.74201	2.36059	3
SET;SETSIP	2.62694	0.00017251	A0A0C4DFV9;A0A087X027;Q01105-3;Q01105-4;Q01105-2;Q01105;P0DME0	Protein SET;Protein SETSIP	2	2.1746	2.80843	2.8978	3
IK	2.61786	9.88316e-05	Q13123;E7EQZ7;Q9H4P6;D6REL4;D6RAY9;D6RCQ4;A0A0C4DGW5	Protein Red	23	2.75672	2.3817	2.71515	3
FUBP1	2.61749	9.88316e-05	Q96AE4;E9PEB5	Far upstream element-binding protein 1	32	2.69599	2.43106	2.72541	3
MCM4	2.61608	0.00012988	P33991;E5RG31;E5RFJ8	DNA replication licensing factor MCM4	23	2.24452	2.75628	2.84746	3
GTF2I	2.61113	9.88316e-05	P78347-2;P78347-4;P78347-3;P78347;P78347-5;C9J6M0;A0A087WW90;A0A0D9SF80;A0A0A0MSY2;Q86UP8-3;Q86UP8;Q6EKJ0	General transcription factor II-I	42	2.61847	2.58926	2.62564	3
SRSF6	2.61038	0.000124198	Q13247-3;Q13247;Q13247-2;A0A0D9SGD2	Serine/arginine-rich splicing factor 6	13	2.72056	2.25752	2.85306	3
PRCC	2.61029	0.000107744	Q92733;H0YE12;H0Y679	Proline-rich protein PRCC	9	2.74272	2.28933	2.79882	3
HNRNPD	2.60603	9.88316e-05	Q14103-3;Q14103;H0YA96;H0Y8G5;Q14103-4;Q14103-2;D6RAF8;D6RF44;D6RBQ9;D6RD83	Heterogeneous nuclear ribonucleoprotein D0	22	2.46124	2.58576	2.77108	3
SON	2.60369	9.88316e-05	P18583-7;P18583;P18583-5;P18583-9;P18583-10;P18583-4;P18583-6;P18583-2;P18583-3;H7C1M2;P18583-8;J3QSZ5;H7C2G8;H7C1S4;H7C257	Protein SON	23	2.47589	2.60179	2.73338	3
POLDIP3	2.59445	9.88316e-05	F6VRR5;Q9BY77;Q9BY77-2;F8WCX5;Q8WUT1;Q6R954;F8WEE2	Polymerase delta-interacting protein 3	13	2.66398	2.53518	2.58419	3
VRK1	2.59365	0.000168973	Q99986;H0YJ50;H0YJJ9	Serine/threonine-protein kinase VRK1	7	2.56374	2.22857	2.98863	3
CCNK	2.58962	9.88316e-05	O75909;O75909-4;G3V5E1;O75909-1;G3V2Q3;O75909-2;G3V235	Cyclin-K	7	2.31133	2.71271	2.74483	3
SRRT	2.58952	9.88316e-05	Q9BXP5-4;Q9BXP5-2;Q9BXP5-3;Q9BXP5;Q9BXP5-5;H7C3A1;H7C1K0;H7C0U8;A0A0A0MSP6;C9JUL9	Serrate RNA effector molecule homolog	41	2.66866	2.36432	2.73557	3
SSRP1	2.58821	0.000128046	Q08945;E9PMD4;A0A0U1RRK2	FACT complex subunit SSRP1	17	2.25099	2.87704	2.63659	3
SNW1	2.5743	9.88316e-05	Q13573;G3V3A4;G3V4X8;G3V5R3	SNW domain-containing protein 1	26	2.63066	2.40814	2.6841	3
SNRNP70	2.57405	0.000200613	P08621;P08621-2;P08621-3;M0QYR1;P08621-4;M0QX04	U1 small nuclear ribonucleoprotein 70 kDa	16	2.62723	2.14062	2.95431	3
QKI	2.57242	0.000316473	Q96PU8-9;Q96PU8-8;Q96PU8-6;Q96PU8;Q96PU8-5;Q96PU8-3;H0YG47;F5GXS8;F5GYM3;H0YGD6;F5H5U6;F5H8C8;F5GYT7	Protein quaking	11	2.71618	2.02868	2.9724	3
PRPF4	2.56969	9.88316e-05	O43172-2;O43172	U4/U6 small nuclear ribonucleoprotein Prp4	6	2.44718	2.84519	2.4167	3
NAT10	2.56398	0.000333079	Q9H0A0;Q9H0A0-2;A0A087WV29;E9PJN6;E9PMU0	N-acetyltransferase 10	11	1.99273	2.81809	2.88112	3
SMARCA5	2.55079	9.88316e-05	O60264	SWI/SNF-related matrix-associated actin-dependent regulator of chromatin subfamily A member 5	34	2.29019	2.68412	2.67807	3
HNRNPL	2.54849	9.88316e-05	P14866;M0QXS5;P14866-2;M0QYT0;M0R1W6;B4DVF8;M0QYL7;M0R076;H7C464	Heterogeneous nuclear ribonucleoprotein L	24	2.34767	2.69414	2.60367	3
PES1	2.54758	9.88316e-05	B5MCF9;O00541-2;O00541;B3KXD6;H7C267;H7BYY8	Pescadillo homolog	11	2.43421	2.39045	2.81807	3
ZC3H4	2.54698	9.88316e-05	M0QY97;Q9UPT8	Zinc finger CCCH domain-containing protein 4	12	2.61575	2.35129	2.67392	3
CCDC86	2.54343	0.000108946	Q9H6F5;Q9H6F5-2	Coiled-coil domain-containing protein 86	5	2.84892	2.34233	2.43904	3
DHX16	2.54279	0.000107744	O60231;A0A140T947;Q5SQH5;A0A140T8Y5;A0A140T9T4;A2AB15	Putative pre-mRNA-splicing factor ATP-dependent RNA helicase DHX16	26	2.64621	2.24059	2.74157	3
WTAP	2.54271	0.000150933	Q15007;A0A087X1R4;Q15007-2	Pre-mRNA-splicing regulator WTAP	10	2.77064	2.13734	2.72015	3
XRCC5	2.5334	0.00019045	P13010;C9JZ81;H7C0H9	X-ray repair cross-complementing protein 5	32	2.08464	2.81059	2.70496	3
NFYC	2.52951	0.000220057	Q5T6K7;E9PI99;Q5T6K5;Q13952-6;Q13952-7;Q13952-2;Q13952-5;Q13952-3;Q13952;A0A0A0MT00;Q13952-4;E9PL11;E9PJA8;E9PQR2;A0A087WXG1	Nuclear transcription factor Y subunit gamma	5	2.73859	2.04918	2.80074	3
PRPF39	2.52916	0.000306042	Q86UA1;H0YJY9	Pre-mRNA-processing factor 39	4	NA	2.61885	2.43946	2
HMGB2	2.52173	9.88316e-05	P26583;D6R9A6	High mobility group protein B2	9	2.62964	2.28998	2.64559	3
SSB	2.51809	9.88316e-05	P05455;E7ERC4;E9PGX9;E9PFL9	Lupus La protein	14	2.59507	2.37498	2.58422	3
CBX1	2.51164	0.000321044	B5MD17;J3KS05;P83916;K7ELA4;C9JWS9	Chromobox protein homolog 1	4	2.61242	NA	2.41086	2
CHAF1B	2.5071	0.000312144	Q13112	Chromatin assembly factor 1 subunit B	3	NA	2.59636	2.41784	2
SKIV2L2	2.50706	0.000138073	P42285;H0Y8U3;D6REC7;H0YAC4	Superkiller viralicidic activity 2-like 2	18	2.15869	2.5772	2.78528	3
SF3B4	2.50556	0.000213652	Q15427;Q5SZ64	Splicing factor 3B subunit 4	5	2.12337	2.46011	2.93319	3
KDM1A	2.50543	9.88316e-05	O60341;O60341-2;R4GMP9	Lysine-specific histone demethylase 1A	9	2.46155	2.57066	2.48409	3
RNF20	2.50539	9.88316e-05	Q5VTR2;C9JWJ4;C9J0A5;C9JXC9	E3 ubiquitin-protein ligase BRE1A	10	2.34741	2.75189	2.41687	3
MTA1	2.50349	0.000172499	E7ESY4;Q13330-3;Q13330;Q13330-2;H0Y4T7;F8W9Y9;D6W5A2;H7C3F3;H0YIT0	Metastasis-associated protein MTA1	9	2.12608	2.85927	2.52512	3
DDX50	2.49902	0.000386168	Q9BQ39;A0A087WVC1	ATP-dependent RNA helicase DDX50	8	NA	2.63807	2.35997	2
DDX41	2.49371	9.88316e-05	J3KNN5;Q9UJV9;H0YA06;D6RGI7;H0Y8L8	Probable ATP-dependent RNA helicase DDX41	11	2.42285	2.5966	2.46169	3
MCM3	2.48902	9.88316e-05	P25205;P25205-2;J3KQ69;Q7Z6P5	DNA replication licensing factor MCM3	55	2.48885	2.38156	2.59665	3
HIST1H2AJ;HIST1H2AH;H2AFJ;HIST2H2AC;HIST1H2AC;HIST3H2A;HIST2H2AA3;HIST1H2AD;HIST1H2AG;HIST1H2AB;H2AFV;H2AFZ;HIST1H2AA;H2AFX	2.48882	0.000331922	A0A0U1RR32;A0A0U1RRH7;Q99878;Q96KK5;Q9BTM1;Q16777;Q93077;Q7L7L0;Q6FI13;P20671;P0C0S8;P04908;H0YFX9;C9J0D1;Q71UI9-2;Q71UI9;P0C0S5;Q96QV6;P16104;Q9BTM1-2;C9J386;Q71UI9-5;Q71UI9-3;Q71UI9-4;Q8IUE6	Histone H2A type 1-J;Histone H2A type 1-H;Histone H2A.J;Histone H2A type 2-C;Histone H2A type 1-C;Histone H2A type 3;Histone H2A type 2-A;Histone H2A type 1-D;Histone H2A type 1;Histone H2A type 1-B/E;Histone H2A;Histone H2A.V;Histone H2A.Z;Histone H2A type 1-A;Histone H2AX	3	1.94497	2.69261	2.82888	3
XRCC6	2.4885	9.88316e-05	P12956;B1AHC9;P12956-2	X-ray repair cross-complementing protein 6	43	2.3386	2.47959	2.64731	3
EXOSC7	2.48665	9.88316e-05	Q15024	Exosome complex component RRP42	4	2.48179	2.34537	2.63278	3
SCAF4	2.48505	9.88316e-05	O95104-3;O95104;O95104-2;A0A0A0MT33;Q9UPN6;Q9UPN6-2	Splicing factor, arginine/serine-rich 15	4	2.46213	2.53518	2.45783	3
ZRANB2	2.48421	0.00017355	A0A0C4DGV5;O95218-2;O95218	Zinc finger Ran-binding domain-containing protein 2	6	2.85244	2.123	2.47719	3
HNRNPM	2.48391	9.88316e-05	P52272;A0A087X0X3;P52272-2;M0QZM1;M0R019;M0R2T0;M0R0N3;M0QYQ7;M0R2I7;M0R0Y6;M0QYL3;M0QY96	Heterogeneous nuclear ribonucleoprotein M	49	2.47597	2.40969	2.56606	3
SARNP	2.48253	0.000102767	P82979;F8VZQ9;H0YHG0;F8VS12	SAP domain-containing ribonucleoprotein	6	2.76118	2.37368	2.31272	3
HNRNPA2B1	2.48006	9.88316e-05	P22626;P22626-2;A0A087WUI2	Heterogeneous nuclear ribonucleoproteins A2/B1	39	2.63476	2.32723	2.4782	3
RBM10	2.47971	0.000118764	A0A0A0MR66;P98175-2;P98175;P98175-4;P98175-3	RNA-binding protein 10	42	2.62349	2.16585	2.64978	3
CHTOP	2.4773	9.88316e-05	A0A087X1B7;X6R700;Q9Y3Y2-4;Q9Y3Y2;Q9Y3Y2-3;Q5T7Y7	Chromatin target of PRMT1 protein	2	2.42156	2.28818	2.72216	3
CSTF1	2.47445	9.88316e-05	Q05048;A0A0A0MSZ9;A3KFI9	Cleavage stimulation factor subunit 1	7	2.48792	2.24717	2.68827	3
SNRPE	2.4689	0.000133495	P62304;A6NHK2	Small nuclear ribonucleoprotein E	2	2.41435	2.19491	2.79745	3
RBM17	2.46548	9.88316e-05	Q96I25;Q5W011;Q5W010;Q5W012;H0Y6J6	Splicing factor 45	19	2.71059	2.2817	2.40414	3
CPSF6	2.46019	9.88316e-05	F8WJN3;Q16630-3;Q16630;Q16630-2;F8W084	Cleavage and polyadenylation specificity factor subunit 6	14	2.58309	2.34883	2.44866	3
KIAA0907	2.45904	0.00220066	Q7Z7F0-3;Q7Z7F0-2;Q7Z7F0;Q7Z7F0-4	UPF0469 protein KIAA0907	3	2.03492	2.88315	NA	2
U2AF2	2.45805	0.000247898	P26368-2;P26368;K7ENG2;K7ELP8	Splicing factor U2AF 65 kDa subunit	10	2.4022	2.90061	2.07135	3
BCLAF1	2.45309	0.000108946	E9PK91;Q9NYF8-3;Q9NYF8-2;Q9NYF8;E9PK09;E9PQN2;E9PKI6;Q9NYF8-4;E9PJA7;H0YF63;H0YF14;H0YF00	Bcl-2-associated transcription factor 1	37	2.61023	2.16356	2.58547	3
ILF3	2.45281	9.88316e-05	Q12906-7;Q12906;Q12906-4;Q12906-6;Q12906-5;Q12906-2;Q12906-3;K7EKJ9;K7EQR9;K7EKY0;K7ER69;K7EJ09;K7EPG3;K7EM82;K7ERM6;K7ENK6;K7ELV3	Interleukin enhancer-binding factor 3	46	2.39928	2.4221	2.53705	3
SRSF11	2.45256	0.000107744	Q5T760;Q05519-2;Q05519;Q5T757;B4DWT1	Serine/arginine-rich splicing factor 11	4	2.69922	2.45502	2.20345	3
RPA1	2.45178	0.000127194	P27694;I3L4R8;I3L524;I3L2M5	Replication protein A 70 kDa DNA-binding subunit;Replication protein A 70 kDa DNA-binding subunit, N-terminally processed	19	2.12727	2.56533	2.66275	3
SUPT6H	2.45013	9.88316e-05	Q7KZ85;Q7KZ85-2;Q7KZ85-3	Transcription elongation factor SPT6	51	2.47941	2.44265	2.42833	3
DDX5	2.44814	9.88316e-05	P17844;J3KTA4;P17844-2;J3QRQ7;J3QSF1;J3KRZ1;J3KRX8;J3QR02;X6RLV5;J3QKN9;J3QS79;J3QRN5	Probable ATP-dependent RNA helicase DDX5	38	2.24775	2.67611	2.42056	3
C17orf85	2.43873	9.88316e-05	Q53F19;Q53F19-2;K7ELP6	Uncharacterized protein C17orf85	7	2.57248	2.2245	2.51921	3
TKT	2.43569	9.88316e-05	P29401;P29401-2;A0A0B4J1R6;E9PFF2;F8W888;F8WAX4	Transketolase	26	2.5032	2.21537	2.58849	3
CPSF7	2.43066	9.88316e-05	Q8N684-2;Q8N684;Q8N684-3;F5H669;J3QT54;F5H6M0;F5H047;C9J286;C9J323;C9JM38;F5H5B7;F5H1W4;F5H2K8;F5H6P5;F5H6A8;F5GXA3	Cleavage and polyadenylation specificity factor subunit 7	13	2.46582	2.33917	2.487	3
GTF2F1	2.42987	0.000762697	M0R0Z3;P35269;M0R0R9;M0QXD6	General transcription factor IIF subunit 1	2	2.18447	NA	2.67527	2
RBM27	2.42871	9.88316e-05	Q9P2N5;U3KPZ7	RNA-binding protein 27	18	2.41405	2.42487	2.44721	3
NELFA	2.42761	0.000148889	A0A0C4DFX9;Q9H3P2;H0Y3X6;C9JHL4;C9JEM7;H7C2C7;Q9H3P2-7;H7C0W2;H7C3C2;F8W954;F8WF98;H7C2M8	Negative elongation factor A	9	2.67457	2.06354	2.54473	3
ANP32B	2.42527	0.000927245	Q92688-2;Q92688	Acidic leucine-rich nuclear phosphoprotein 32 family member B	10	3.16957	2.12118	1.98506	3
DDX17	2.42527	9.88316e-05	H3BLZ8;Q92841;Q92841-1;Q92841-3;Q92841-2;A0A0U1RQJ0	Probable ATP-dependent RNA helicase DDX17	35	2.26733	2.56896	2.43952	3
ZNF207	2.42253	0.000140513	J3QRS9;X6R4W8;O43670-2;O43670;O43670-4;O43670-3;J3KS31;J3QS27;J3KTL1;J3KRB6;J3KRW6;H0Y3M2	BUB3-interacting and GLEBS motif-containing protein ZNF207	9	2.65823	2.07286	2.5365	3
LUC7L	2.42163	9.88316e-05	Q9NQ29-2;Q9NQ29;A8MYV2;Q9NQ29-3;B8ZZ10;B8ZZ09;B8ZZ12;F8WBC1;F2Z322;B8ZZ08	Putative RNA-binding protein Luc7-like 1	7	2.36112	2.34769	2.55609	3
HIST1H2BC;HIST1H2BN;HIST1H2BL;HIST1H2BM;HIST1H2BH;HIST2H2BF;HIST1H2BD;H2BFS;HIST1H2BK;HIST3H2BB;HIST2H2BE;HIST1H2BB;HIST1H2BO;HIST1H2BJ	2.41943	0.000482391	B2R4S9;U3KQK0;Q99880;Q99879;Q99877;Q93079;Q5QNW6;P62807;P58876;P57053;O60814;Q5QNW6-2;Q8N257;Q16778;P33778;P23527;P06899;Q96A08	Histone H2B;Histone H2B type 1-L;Histone H2B type 1-M;Histone H2B type 1-N;Histone H2B type 1-H;Histone H2B type 2-F;Histone H2B type 1-C/E/F/G/I;Histone H2B type 1-D;Histone H2B type F-S;Histone H2B type 1-K;Histone H2B type 3-B;Histone H2B type 2-E;Histone H2B type 1-B;Histone H2B type 1-O;Histone H2B type 1-J	5	2.08038	2.15536	3.02255	3
ZNF768	2.4111	9.88316e-05	H3BS42;Q9H5H4	Zinc finger protein 768	7	2.45088	2.29222	2.49021	3
SMARCA4	2.40862	9.88316e-05	Q9HBD4;P51532-5;P51532-2;P51532-3;P51532-4;P51532;A0A0A0MT49;P51531-2;P51531;A0A0U1RQZ9;F6VDE0;A0A0U1RQE1;K7EP28;A0A0U1RRF5;A0A0U1RRD6;A0A0U1RRF8;A0A0A0MSS5;F6UH26;A0A0U1RQU0;A0A0U1RR09;F6XE55;A0A0U1RQW7;A0A0U1RRN2;B1ALG1;A0A0U1RR83;A0A0U1RQX3;F6T8Q0;B1ALG2;A0A0U1RR26;A0A0U1RRG6;B4DNT1;B1ALF6	Transcription activator BRG1	28	2.40509	2.33914	2.48163	3
PPIE	2.40708	0.000308937	E9PKY5;E9PEQ6;Q9UNP9-2;Q9UNP9;Q9UNP9-3	Peptidyl-prolyl cis-trans isomerase;Peptidyl-prolyl cis-trans isomerase E	4	2.38419	1.97673	2.86031	3
RBMX	2.40651	9.88316e-05	P38159;H3BT71;P38159-2;H0Y6E7;H3BUY5;H3BR27;P38159-3;O75526;H3BNC1;Q8N7X1	RNA-binding motif protein, X chromosome;RNA-binding motif protein, X chromosome, N-terminally processed	25	2.48223	2.3358	2.40149	3
C9orf78	2.40475	0.000107744	Q9NZ63;A0A087X2F5	Uncharacterized protein C9orf78	9	2.53179	2.55159	2.13086	3
FIP1L1	2.39749	0.000131119	Q6UN15-3;Q6UN15-5;Q6UN15;Q6UN15-4;A0A0B4J203;H0Y8P7	Pre-mRNA 3-end-processing factor FIP1	8	2.70337	2.34874	2.14035	3
MCM5	2.39339	0.000109195	P33992;B1AHB1;B1AHB2;B1AHA9	DNA replication licensing factor MCM5	27	2.11989	2.56925	2.49103	3
KHDRBS3	2.39239	0.000146342	O75525-2;O75525;H0YAQ3;E5RJZ9;E5RG12;H0YAQ1	KH domain-containing, RNA-binding, signal transduction-associated protein 3	8	2.32008	2.12502	2.73207	3
LITAF;TLE3	2.39217	0.000197549	F5H7D6;H0YNT2;A0A0D9SES8;H0YKT5;H0YKN8;H0YL70;Q04726-2;Q04726-7;Q04726-3;Q04726-6;Q04726-5;Q04726-4;Q04726;H0YKH0;H0YLW9;H0YLI3;H3BUH5;H0YKH5;H0YNI7;K7EMK7;Q5T7A9;Q04725-2;Q04727-2;Q04725;Q04727-4;Q04724;Q04727;Q04727-3	Transducin-like enhancer protein 3	3	1.97141	2.56377	2.64134	3
SUPT5H	2.39089	9.88316e-05	O00267-2;O00267;M0QYL9	Transcription elongation factor SPT5	46	2.37493	2.35713	2.44061	3
UTP3	2.38982	0.00022639	Q9NQZ2	Something about silencing protein 10	7	2.45402	2.74287	1.97258	3
RBM15	2.38857	9.88316e-05	A0A087WWP4;Q96T37-4;Q96T37-2;Q96T37-3;Q96T37;Q8NDT2-2;Q8NDT2	Putative RNA-binding protein 15	22	2.22305	2.51086	2.43181	3
SRSF10	2.38564	0.000481828	Q5JRI1;O75494-5;O75494-4;O75494-6;O75494-3;O75494-2;O75494;Q6IQ42;Q8WXF0;R4GMP8	Serine/arginine-rich splicing factor 10	10	2.95856	2.23355	1.96481	3
RBM12	2.38428	9.88316e-05	Q9NTZ6;A6PVI1;A6PVI0;Q5JX62	RNA-binding protein 12	17	2.49557	2.14542	2.51185	3
SRRM2	2.37999	0.000108946	Q9UQ35;Q9UQ35-2;I3L4D8;I3L0N7;I3L3Q8;I3L1I8;I3L182;Q9UQ35-3	Serine/arginine repetitive matrix protein 2	19	2.20917	2.28327	2.64752	3
CWC27	2.3799	0.000867633	Q6UX04;D6REK3;Q6UX04-2	Peptidyl-prolyl cis-trans isomerase CWC27 homolog	5	2.57207	1.68558	2.88206	3
TEX10	2.37974	0.000167992	Q9NXF1-2;Q9NXF1;A0A0A0MSR3	Testis-expressed sequence 10 protein	18	2.08001	2.73853	2.32069	3
MTA2	2.37607	0.000260829	O94776;O94776-2	Metastasis-associated protein MTA2	13	2.08294	2.84382	2.20145	3
STAG2	2.36871	9.88316e-05	Q8N3U4;Q8N3U4-2;B1AMT4;Q8WVM7-2;Q8WVM7;Q68DW7;B1AMT1;B1AMT2;B1AMT3;C9J3T3;D6W5U7;Q9UJ98-2;Q9UJ98-3;Q9UJ98	Cohesin subunit SA-2	25	2.33402	2.31359	2.45851	3
NONO	2.36441	9.88316e-05	Q15233;Q15233-2;H7C367;C9JYS8;C9IZL7;C9J4X2	Non-POU domain-containing octamer-binding protein	37	2.17996	2.35752	2.55574	3
SNRNP200	2.36233	9.88316e-05	O75643;O75643-2;B4E0P5	U5 small nuclear ribonucleoprotein 200 kDa helicase	97	2.31022	2.38214	2.39462	3
DHX9	2.36167	0.000142132	Q08211;Q08211-2;REV__H0YA90;REV__Q7Z6J0-3	ATP-dependent RNA helicase A	64	2.03759	2.6277	2.41973	3
TCERG1	2.36042	9.88316e-05	O14776-2;O14776;G3V220	Transcription elongation regulator 1	14	2.4572	2.29834	2.32573	3
RCC1	2.35818	0.00137496	P18754;P18754-2;C9JW69;C9JRH2;C9JMJ4;C9J3R0;C9JQZ4	Regulator of chromosome condensation	10	1.75433	2.19506	3.12514	3
KIAA1429	2.35244	0.000316473	Q69YN4-3;Q69YN4;Q69YN4-2;Q69YN4-4;H0YBN5;H0YB68	Protein virilizer homolog	19	2.36101	NA	2.34386	2
TCEA1	2.35014	0.000332287	P23193;P23193-2;E5RIS7;E5RJ93;E5RK46;E5RFI1;B7Z4S1	Transcription elongation factor A protein 1	15	2.40926	1.88116	2.76001	3
RRP12	2.34851	0.000107273	Q5JTH9;Q5JTH9-2;Q5JTH9-3;A0A087X1U8;H7C1M8;A0A087X0G0	RRP12-like protein	29	2.14525	2.31728	2.58301	3
CDC73	2.34591	0.000172499	Q6P1J9	Parafibromin	11	2.58676	1.96621	2.48476	3
EIF4A3	2.34458	9.88316e-05	P38919;I3L3H2	Eukaryotic initiation factor 4A-III;Eukaryotic initiation factor 4A-III, N-terminally processed	21	2.27178	2.26715	2.4948	3
PSPC1	2.34155	0.00078266	Q8WXF1;Q8WXF1-2;X6RDA4	Paraspeckle component 1	16	1.6618	2.64957	2.71328	3
HMGB3	2.34103	0.00067982	E9PES6;E7ES08;E7EQU1;O15347	High mobility group protein B3	2	2.23824	2.95084	1.83402	3
HNRNPK	2.33895	9.88316e-05	P61978-2;P61978;S4R457;S4R359	Heterogeneous nuclear ribonucleoprotein K	37	2.29951	2.25813	2.45922	3
PARP1	2.3264	9.88316e-05	P09874;Q5VX84;Q5VX85	Poly [ADP-ribose] polymerase 1	67	2.10178	2.41997	2.45744	3
RAD50	2.32555	0.000257276	Q92878-3;Q92878;Q92878-2;H7C0V2;E7EN38;E7ESD9	DNA repair protein RAD50	6	1.99215	2.7619	2.22259	3
STRBP	2.32525	0.000159734	Q96SI9-2;Q96SI9;H0YC91;Q5JPA5	Spermatid perinuclear RNA-binding protein	15	2.01175	2.63919	2.32481	3
ZC3H14	2.32444	9.88316e-05	Q6PJT7-5;Q6PJT7-9;Q6PJT7-2;Q6PJT7;G3V256;H0YJA2;Q6PJT7-3;Q6PJT7-10;Q6PJT7-4;Q6PJT7-11;G3V5I6;G3V3Y4;G3V3R9;G3V240;G3V572;A0A087WTC9;G3V411;G3V473;G3V4R5;G3V2X4;H0YJ87	Zinc finger CCCH domain-containing protein 14	21	2.4878	2.19226	2.29328	3
PPP1R8	2.3174	0.00151385	Q12972;Q12972-2;A0A0A0MT09;Q12972-3	Nuclear inhibitor of protein phosphatase 1;Activator of RNA decay	9	1.57759	2.9835	2.39111	3
CTBP2	2.31435	9.88316e-05	Q5SQP8;P56545;P56545-2;A0A087WYL1	C-terminal-binding protein 2	9	2.38858	2.30437	2.25011	3
PHF6	2.31218	0.000284291	A0A0D9SGE8;Q8IWS0-5;Q8IWS0-3;Q8IWS0;Q5JRC6;Q8IWS0-4;Q8IWS0-2	PHD finger protein 6	9	1.84346	2.51106	2.58203	3
TSPAN10	2.3076	9.88316e-05	A0A087X235;A0A087WWT4;Q9H1Z9	Tetraspanin-10	1	2.35188	2.11267	2.45825	3
RPRD1A	2.30309	9.88316e-05	Q96P16;A0A0C4DGQ6;Q96P16-3;K7EP82;K7ER50;K7EQR8	Regulation of nuclear pre-mRNA domain-containing protein 1A	13	2.38918	2.24893	2.27116	3
ESF1	2.29734	0.00594103	Q9H501;A0A087WX71	ESF1 homolog	5	1.73322	NA	2.86146	2
CFDP1	2.29368	0.00078266	Q9UEE9;Q9UEE9-2	Craniofacial development protein 1	2	2.51405	NA	2.07331	2
TRIM28	2.29361	9.88316e-05	Q13263;Q13263-2;M0R0K9;M0R3C0;M0R2I3	Transcription intermediary factor 1-beta	43	2.17817	2.31681	2.38585	3
NVL	2.29239	0.00142274	O15381;O15381-5;O15381-2;O15381-3;O15381-4;E9PH71;E9PGD8;E7EWK7;F8WF01;C9J6P7	Nuclear valosin-containing protein-like	10	1.7973	2.00659	3.07327	3
NELFCD;TH1L	2.29111	0.000132147	X6RLT1;H0UI80;Q8IXH7-4;Q8IXH7;Q8IXH7-3	Negative elongation factor C/D	9	2.57383	2.05266	2.24683	3
SRSF9	2.29109	9.88316e-05	Q13242;H0YIB4;S4R3G0	Serine/arginine-rich splicing factor 9	9	2.27417	2.30229	2.29681	3
GATAD2B	2.29003	0.000266313	A0A0U1RRM1;Q8WXI9;A0A0U1RR30	Transcriptional repressor p66-beta	8	1.8437	2.57749	2.4489	3
PARN	2.28696	9.88316e-05	O95453-2;O95453;O95453-3;O95453-4;H3BRK1;F5H1Z4	Poly(A)-specific ribonuclease PARN	11	2.28428	2.10128	2.47532	3
SF3A3	2.28617	0.000150933	Q12874	Splicing factor 3A subunit 3	19	2.12353	2.10829	2.62667	3
GTF2F2	2.28498	0.000483615	P13984	General transcription factor IIF subunit 2	4	2.41608	NA	2.15387	2
SDAD1	2.2816	0.000263942	Q9NVU7;E7EW05;Q9NVU7-2;F8W8T7;D6RC74	Protein SDA1 homolog	5	1.86643	2.6362	2.34216	3
SF1	2.27416	9.88316e-05	Q15637-6;Q15637-2;Q15637-4;Q15637-3;Q15637;F8WEV5	Splicing factor 1	17	2.41611	2.14802	2.25834	3
CWC22	2.27129	0.000140723	B7WP74;Q9HCG8	Pre-mRNA-splicing factor CWC22 homolog	9	1.95136	2.44469	2.41781	3
MIER1	2.26907	9.88316e-05	Q8N108-19;Q8N108-16;Q8N108-14;Q8N108-18;Q8N108-17;Q8N108-15;Q8N108;Q8N108-13;Q8N108-12	Mesoderm induction early response protein 1	2	2.39641	2.2093	2.20151	3
SMARCC1	2.25622	9.88316e-05	Q92922;F8WE13	SWI/SNF complex subunit SMARCC1	25	2.3257	2.12108	2.32187	3
SAP30BP	2.25458	0.00419241	J3QQJ0;Q9UHR5-2;Q9UHR5;X6R3T8;J3QLH3;J3KS14;F5H478;J3KRU5;J3KRR6	SAP30-binding protein	6	2.73181	1.21282	2.81912	3
HNRNPA3	2.25192	9.88316e-05	P51991-2	Heterogeneous nuclear ribonucleoprotein A3	27	2.24935	2.21279	2.29361	3
HNRNPUL1	2.25138	9.88316e-05	Q9BUJ2-2;Q9BUJ2;Q9BUJ2-3;A0A0A0MRA5;B7Z4B8;Q9BUJ2-4;M0R3F1;M0QYZ0;M0QZV6;M0R0K8;M0R203;M0QYI8;M0R247;A0A087X1I2;Q9BUJ2-5;M0QYM5	Heterogeneous nuclear ribonucleoprotein U-like protein 1	31	2.39254	2.08607	2.27554	3
LIG3	2.24984	0.000490712	P49916-3;P49916;P49916-4;P49916-2;K7ERZ5;K7EQB6	DNA ligase 3	8	1.75754	2.71892	2.27307	3
XRN2	2.24874	9.88316e-05	Q9H0D6;Q9H0D6-2	5-3 exoribonuclease 2	30	2.31432	2.06223	2.36969	3
PAPSS1	2.24631	0.000151259	O43252	Bifunctional 3-phosphoadenosine 5-phosphosulfate synthase 1;Sulfate adenylyltransferase;Adenylyl-sulfate kinase	5	2.12819	2.03506	2.57568	3
HIRIP3	2.24505	0.000591554	Q9BW71-2;Q9BW71;Q9BW71-3	HIRA-interacting protein 3	3	NA	2.08383	2.40626	2
MATR3	2.24437	9.88316e-05	A0A0R4J2E8;P43243;D6REM6;D6R991;H0Y8T4;B3KM87;P43243-2;D6RBK5;D6R8Z5;D6RCM3;D6REK4;D6RBI2;D6RE02;D6RIA2;D6RB45;D6R9F3;D6RAM9;D6RAY2;D6RBS2	Matrin-3	55	2.23839	2.19708	2.29763	3
CMTR1	2.24197	9.88316e-05	Q8N1G2;H0YCQ1;H0Y4T0	Cap-specific mRNA (nucleoside-2-O-)-methyltransferase 1	6	2.19919	2.09001	2.43672	3
DPF2	2.24155	9.88316e-05	J3KMZ8;Q92785-2;Q92785;E9PN04	Zinc finger protein ubi-d4	5	2.27971	2.05029	2.39465	3
SCML2	2.22998	9.88316e-05	Q9UQR0	Sex comb on midleg-like protein 2	4	2.3065	2.33139	2.05207	3
PRPF8	2.22945	9.88316e-05	Q6P2Q9;I3L0J9;I3L3Z8;I3L1T8	Pre-mRNA-processing-splicing factor 8	76	2.22104	2.19365	2.27367	3
FAM98B	2.22674	0.000168147	Q52LJ0;Q52LJ0-2;H0YNA1	Protein FAM98B	10	2.38328	1.88166	2.41527	3
RPRD2	2.22431	9.88316e-05	Q5VT52-3;Q5VT52;Q5VT52-2;Q5VT52-5;Q5VT52-4	Regulation of nuclear pre-mRNA domain-containing protein 2	17	2.4143	2.1395	2.11912	3
PPHLN1	2.22418	0.000631529	F8W0Q9;Q8NEY8-9;Q8NEY8-8;Q8NEY8-2;Q8NEY8;F8VPY7;F8VWU8;F8VRK2;F8WF16;B7Z8L1;F8W6A0;Q8NEY8-6;Q8NEY8-3;Q8NEY8-5;F8VXV7;REV__K7EN69;Q8NEY8-7	Periphilin-1	8	2.40817	2.62494	1.63942	3
ADNP	2.22334	9.88316e-05	Q9H2P0;E9PQK8	Activity-dependent neuroprotector homeobox protein	13	2.10195	2.40212	2.16594	3
HTATSF1	2.2207	0.000417265	O43719;Q5H918;Q5H919	HIV Tat-specific factor 1	12	1.73786	2.61864	2.30559	3
GNL3	2.21847	0.000200613	Q9BVP2-2;Q9BVP2;C9JYH9;C9JZT7;B4DMU5	Guanine nucleotide-binding protein-like 3	15	1.84262	2.45273	2.36006	3
HNRNPA3	2.21728	9.88316e-05	P51991;H7C1J8	Heterogeneous nuclear ribonucleoprotein A3	30	2.27017	2.07108	2.3106	3
MED1	2.21645	0.000120318	Q15648-3;Q15648	Mediator of RNA polymerase II transcription subunit 1	3	2.45318	2.0091	2.18707	3
THUMPD1	2.216	0.00053028	Q9NXG2;H3BNW0	THUMP domain-containing protein 1	4	2.08468	2.34733	NA	2
NPM1	2.21395	0.000127853	P06748-3;P06748;P06748-2;E5RI98;E5RGW4	Nucleophosmin	16	2.05891	2.09845	2.4845	3
RBBP6	2.20685	9.88316e-05	Q7Z6E9;Q7Z6E9-2;Q7Z6E9-4;H3BUN0;I3L3Y2;A0A087WY32	E3 ubiquitin-protein ligase RBBP6	20	2.16826	2.30763	2.14467	3
NOP2	2.19718	0.000209599	A0A087WV73;P46087-2;P46087;P46087-4;P46087-3;F5GYR3;F5H5X6	Probable 28S rRNA (cytosine(4447)-C(5))-methyltransferase	7	1.8532	2.51607	2.22228	3
DBR1	2.19681	0.000110313	Q9UK59;Q9UK59-2	Lariat debranching enzyme	3	2.34224	1.97056	2.27763	3
RFC1	2.19595	0.000184147	P35251-2;P35251;H0Y8U4	Replication factor C subunit 1	7	1.8423	2.32967	2.41589	3
UBA2	2.19563	0.000408022	Q9UBT2;Q9UBT2-2;K7EPL2;U3KQ93;K7ESK7;U3KQ55;K7ES38	SUMO-activating enzyme subunit 2	9	1.73444	2.60227	2.25017	3
TCEB3	2.19384	9.88316e-05	A0A024RAC6;Q14241	Transcription elongation factor B polypeptide 3	7	2.28057	2.25438	2.04656	3
THOC6	2.19239	0.000399527	Q86W42-3;Q86W42;Q86W42-2	THO complex subunit 6 homolog	5	NA	2.1504	2.23438	2
CHD4	2.19199	9.88316e-05	F5GWX5;A0A0C4DGG9;Q14839;Q14839-2;F5H6N4;I3L229;H7C3H7;H7C0J3;F2Z2R5;K7EPV1;K7ESA5	Chromodomain-helicase-DNA-binding protein 4	58	2.09187	2.37011	2.114	3
RAVER1	2.19027	9.88316e-05	A0A087WZ13;E9PAU2;Q8IY67-2;Q8IY67;K7EQG2;K7EKR9;Q8IY67-3	Ribonucleoprotein PTB-binding 1	17	2.23839	2.25891	2.07351	3
KRR1	2.182	0.000394362	Q13601-2;Q13601;A0A087WZC7	KRR1 small subunit processome component homolog	5	2.2053	NA	2.15869	2
HNRNPR	2.17926	9.88316e-05	O43390;O43390-3;B4DT28	Heterogeneous nuclear ribonucleoprotein R	31	2.2485	2.10762	2.18164	3
CREB1	2.17718	0.000316473	P16220-2;P16220;C9JBT4;C9J896;P16220-3;E9PAR2;Q03060-23;Q03060-9;Q03060-24;Q03060-8;C9J4L5;H7C1R5;H7C3I0;E7EWP8;Q03060-32;Q03060-26;G5E998;Q03060-21;Q03060-31;Q03060-6;P18846-2;P18846	Cyclic AMP-responsive element-binding protein 1	3	2.11543	1.82134	2.59476	3
U2SURP	2.17696	9.88316e-05	O15042-2;O15042;E7ET15;O15042-3;H0Y8D9;E7EW00;C9J5L1;H7C4V2;C9JDJ7;U3KPT1	U2 snRNP-associated SURP motif-containing protein	31	2.2462	2.08304	2.20163	3
PRPF40A	2.17585	9.88316e-05	O75400-2;O75400;O75400-3;F5H578;H7C2N3;H0YG38	Pre-mRNA-processing factor 40 homolog A	16	2.06392	2.18865	2.27498	3
AKAP8L	2.1757	0.000131119	Q9ULX6;Q9ULX6-2;V9GZ50;M0R1Y5;M0R010;M0QYT7	A-kinase anchor protein 8-like	5	2.04708	2.4475	2.03252	3
FAM192A;NIP30	2.1723	0.000102189	Q9GZU8;H3BQQ6;H3BTI2;H3BTP8;H3BSY6;H3BP64;H3BUL4;H3BMX9;H3BPH9;H3BPF9;H3BN22;Q6P4H7;H3BSF0;H3BU93;H3BNK9	Protein FAM192A	4	2.3297	1.98845	2.19875	3
TPR	2.17153	0.000119291	P12270;P12270-2;Q5SWX9	Nucleoprotein TPR	60	2.02648	2.41086	2.07724	3
KHDRBS1	2.17051	9.88316e-05	Q07666;Q07666-2;Q07666-3;Q5VWX1;Q9H6N6;Q5STV6;A0A0A0MRT5;Q9UBC1-2;Q9UBC1-3;Q9UBC1	KH domain-containing, RNA-binding, signal transduction-associated protein 1	23	2.28389	1.98495	2.24269	3
HIST1H4A	2.16512	0.000132978	P62805	Histone H4	3	2.43813	2.00694	2.05029	3
RBM25	2.16235	0.000124198	P49756;P49756-2;P49756-3;E9PQU5;H0YE46	RNA-binding protein 25	14	1.929	2.3575	2.20057	3
RBM33	2.15935	0.000648785	Q96EV2;H0Y3K4;H7BXM6;A8MTF7;H7C0H2;Q96EV2-2	RNA-binding protein 33	5	2.3156	NA	2.0031	2
CTBP1	2.15655	0.000193936	Q13363-2;Q13363;E7ESU7;D6RAX2;E7EPF8;E9PGB1;H0Y8W7;H0Y9M9;E7EUB3;H0Y8U5	C-terminal-binding protein 1	8	1.93938	2.5104	2.01988	3
RTF1	2.15366	0.000862435	Q92541	RNA polymerase-associated protein RTF1 homolog	4	1.94957	NA	2.35775	2
DLX5;DLX2;DLX6;DLX1	2.15165	0.000436172	P56178;Q07687;G3V471;F8VXJ2;P56179;P56178-2;Q07687-2;P56177;P56179-2;P56179-3	Homeobox protein DLX-5;Homeobox protein DLX-2;Homeobox protein DLX-6;Homeobox protein DLX-1	2	2.21042	NA	2.09288	2
POLR2A	2.14866	9.88316e-05	A0A0C4DGZ0;P24928;A0A087WWE2;P24928-2	DNA-directed RNA polymerase II subunit RPB1	83	2.18888	2.16883	2.08828	3
SART3	2.14864	0.0019428	Q15020;Q15020-4;F8VV04;Q15020-2;F8W667;F8VVK9;F8VZM2;Q15020-3	Squamous cell carcinoma antigen recognized by T-cells 3	12	1.74347	2.95093	1.75151	3
PRPF19	2.13821	0.000132147	Q9UMS4;F5GY56;H0YGF3;F5H2I0;H0YGZ5	Pre-mRNA-processing factor 19	13	1.94227	2.08304	2.38932	3
SLC4A1AP	2.13771	9.88316e-05	A0A087X0M4;Q9BWU0;A0A087WWF4;H7C256	Kanadaptin	16	2.24245	1.9961	2.17457	3
RNF40	2.13456	9.88316e-05	O75150;H3BP71;O75150-4;O75150-3;H3BS50;H3BQ99;H3BUL6;I3L332;A0A087WTK2	E3 ubiquitin-protein ligase BRE1B	17	2.05918	2.31049	2.034	3
NRF1	2.13188	0.00069146	C9JP85;Q16656-2;Q16656;Q16656-4	Nuclear respiratory factor 1	2	2.2939	NA	1.96986	2
YY1;YY2	2.13045	9.88509e-05	H0YJV7;P25490;H0YJU4;O15391;Q96MM3	Transcriptional repressor protein YY1;Transcription factor YY2	4	2.30065	2.0968	1.99389	3
BRD4	2.12977	0.000874015	O60885;O60885-2;O60885-3;M0QZD9;Q58F21-5;Q58F21-4;Q58F21;Q58F21-3;Q58F21-2	Bromodomain-containing protein 4	8	1.92843	NA	2.3311	2
SMNDC1	2.1296	0.000186556	O75940	Survival of motor neuron-related-splicing factor 30	4	2.1729	1.81361	2.40229	3
EXOSC10	2.12398	0.000119291	Q01780;Q01780-2;K7EJ37	Exosome component 10	22	1.9293	2.32599	2.11666	3
PELP1	2.12236	0.000119089	Q8IZL8;C9JFV4;I3L445;E7EV54;I3L1P4;I3L4M7;I3L4P1	Proline-, glutamic acid- and leucine-rich protein 1	7	1.94752	2.3334	2.08617	3
SRSF5	2.12181	0.00191585	Q13243;Q13243-3;B4DJK0;B4DUA4;G3V5K8;Q13243-2	Serine/arginine-rich splicing factor 5	6	2.25912	1.38156	2.72476	3
PUF60	2.11915	9.88316e-05	Q9UHX1-6;A0A0J9YYL3;A0A0J9YVP6;Q9UHX1-4;Q9UHX1-5;Q9UHX1-2;A0A0J9YXJ8;A0A0J9YXX5;Q9UHX1-3;Q9UHX1;A0A0J9YVR6;E9PQ56;A0A0J9YWM1;H0YEM1;E9PMU7;E9PN18;H0YCP8;E9PL19	Poly(U)-binding-splicing factor PUF60	16	2.16906	2.06994	2.11846	3
DHX38	2.11873	9.88316e-05	Q92620;Q92620-2;J3KTG2;H3BV01;H3BQT9;J3KRT1;J3KSA8;H3BMS7	Pre-mRNA-splicing factor ATP-dependent RNA helicase PRP16	17	2.02995	2.17929	2.14695	3
LUC7L3	2.11622	9.88316e-05	J3KPP4;O95232;D6RDI2;D6RHH0;U3KQT3;E7EN55;C9JL41;O95232-2;H0YA81	Luc7-like protein 3	9	2.02088	2.07121	2.25656	3
FTO	2.11308	0.000606952	Q9C0B1;Q9C0B1-4;Q9C0B1-2;X6R3I0;Q9C0B1-3	Alpha-ketoglutarate-dependent dioxygenase FTO	4	2.24446	NA	1.98171	2
GTF2E1	2.11232	0.000431925	P29083;C9IYL4;C9J329;E9PER7	General transcription factor IIE subunit 1	3	NA	2.09305	2.13159	2
ARID1A	2.11229	0.000254383	O14497;O14497-2;O14497-3;H0Y488;A0A087WUV6;H0YCU6;H0YEW5	AT-rich interactive domain-containing protein 1A	46	2.47257	1.79581	2.0685	3
MPHOSPH10	2.1082	0.000220057	O00566;U3KQ48	U3 small nucleolar ribonucleoprotein protein MPP10	7	1.86908	2.46957	1.98594	3
QRICH1	2.10698	0.000110313	Q2TAL8;C9JAL2;C9JIA8	Glutamine-rich protein 1	10	1.90362	2.19856	2.21878	3
NKX2-5;NKX2-4;NKX2-1	2.10351	0.00209946	P52952;E5RH49;P52952-3;P52952-2;Q9H2Z4;P43699;P43699-3	Homeobox protein Nkx-2.5;Homeobox protein Nkx-2.4;Homeobox protein Nkx-2.1	2	2.43467	NA	1.77235	2
SETD1A	2.10316	0.000414637	O15047;C9J2Z9	Histone-lysine N-methyltransferase SETD1A	10	1.86322	2.58116	1.86509	3
BYSL	2.09911	0.000320978	Q13895;H7BY94;F8WBL2	Bystin	11	2.50157	2.0308	1.76498	3
SNRPN;SNRPB	2.0974	9.88316e-05	J3QLE5;A8MT02;P14678-2;P63162;P14678;P63162-2;P14678-3;J3KRY3;S4R3P3	Small nuclear ribonucleoprotein-associated proteins B and B;Small nuclear ribonucleoprotein-associated protein N	6	2.01382	2.06667	2.2117	3
KHSRP	2.09087	0.000122186	A0A087WTP3;Q92945;M0R0I5;M0QYH3;M0QXW7;M0R3J3;M0QYG1;M0R0C6	Far upstream element-binding protein 2	43	2.10487	1.88799	2.27974	3
CHERP	2.0898	9.88316e-05	J3QK89;Q8IWX8	Calcium homeostasis endoplasmic reticulum protein	18	2.09781	2.06853	2.10306	3
H3F3B;H3F3A;HIST2H3PS2;H3F3C;HIST2H3A;HIST3H3;HIST1H3A	2.08807	0.00285145	K7EMV3;K7EP01;B4DEB1;K7EK07;Q5TEC6;K7ES00;Q6NXT2;Q71DI3;Q16695;P84243;P68431	Histone H3;Histone H3.3C;Histone H3.2;Histone H3.1t;Histone H3.3;Histone H3.1	2	1.78316	1.54003	2.94103	3
C1orf52	2.08137	0.00053028	Q8N6N3;Q8N6N3-2;Q8N6N3-3	UPF0690 protein C1orf52	4	1.99458	NA	2.16816	2
RECQL	2.0795	0.000315933	P46063;F8WA66;F8WD97;F5H2L2;F5H4P4;F5H3W0	ATP-dependent DNA helicase Q1	7	1.6591	2.3027	2.27671	3
LMNB1	2.07913	0.000275813	P20700;E9PBF6;A0A0D9SFE5;A0A0D9SFY5	Lamin-B1	43	1.72831	2.41814	2.09096	3
HNRNPDL	2.07701	0.000142132	O14979-3;O14979-2;A0A087WU03	Heterogeneous nuclear ribonucleoprotein D-like	18	1.86176	2.04348	2.32579	3
HDAC2	2.0767	0.000138588	Q92769-3;Q92769;E5RFI6;E5RJ04;E5RGV4;E5RHE7;E5RH52;E5RG37;E5RFP9;H3BM24;E5RK19	Histone deacetylase 2	8	1.94024	2.33563	1.95423	3
DHX8	2.07336	0.00409858	F5H658;Q14562;K7EJH9;K7END7	ATP-dependent RNA helicase DHX8	7	1.64344	NA	2.50327	2
PPIL4	2.07017	9.88316e-05	Q8WUA2	Peptidyl-prolyl cis-trans isomerase-like 4	15	2.013	1.99081	2.20671	3
PPWD1	2.0688	0.000278371	Q96BP3;F5H7P7;D6RB19;D6RHV0;Q96BP3-2;D6RA12;D6RDA4;D6RD43;D6R9Q1	Peptidylprolyl isomerase domain and WD repeat-containing protein 1	4	1.9449	2.45733	1.80418	3
CCAR2	2.06335	0.000119089	Q8N163-2;Q8N163;G3V119;H0YB24;E5RHJ4;H0YC69;E5RGU7;E5RFJ3;H0YC58	Cell cycle and apoptosis regulator protein 2	9	1.85567	2.1897	2.14467	3
ZC3H13	2.06132	0.000813	Q5T200-2;Q5T200	Zinc finger CCCH domain-containing protein 13	4	1.65375	2.63476	1.89546	3
GGH	2.06129	0.00199224	Q92820	Gamma-glutamyl hydrolase	5	1.49953	2.80043	1.88389	3
MAZ;VEZF1;PATZ1	2.05833	0.000129348	I3L2Z5;A0A087WWR2;P56270-3;P56270;P56270-2;H3BQI4;J3QSH4;Q14119;Q9HBE1-4;Q9HBE1-2;Q9HBE1-3;Q9HBE1	Myc-associated zinc finger protein;Vascular endothelial zinc finger 1;POZ-, AT hook-, and zinc finger-containing protein 1	2	2.2911	1.93904	1.94486	3
HELLS	2.05788	9.88316e-05	A0A087WSW7;F6XU50;A0A0B4J1V9;Q9NRZ9-6;Q9NRZ9-5;Q9NRZ9-3;Q9NRZ9-2;Q9NRZ9;Q9NRZ9-4;Q9NW36;B1ALG6;Q9NRZ9-8;Q9NRZ9-7	Lymphoid-specific helicase	9	2.09427	2.01778	2.0616	3
SFSWAP	2.05705	0.000150933	Q12872;Q12872-2;F5H1A5;H0YFR9	Splicing factor, suppressor of white-apricot homolog	12	2.31264	1.82701	2.0315	3
RBBP4	2.05606	0.000132147	Q09028-3;Q09028;Q09028-2;Q09028-4;E9PNS2;E9PIC4;E9PNS6;H0YF10;C9JPP3;H0YEU5;H0YCT5;H0YDK2	Histone-binding protein RBBP4	8	1.8339	2.08304	2.25123	3
ZNF148	2.05555	0.00283486	Q9UQR1;A0A0A0MTF7;C9JRX0;C9K0U4;C9J6Y6;G5E9X2;Q9UQR1-2	Zinc finger protein 148	5	2.55888	2.39476	1.21301	3
MSH6	2.05362	9.88316e-05	P52701;P52701-4;P52701-3;A0A087WWJ1;P52701-2;A0A087WYT6;C9JH55;C9J8Y8;C9J7Y7;U3KQ72;F8WAX8	DNA mismatch repair protein Msh6	24	2.01632	2.15818	1.98637	3
DHX15	2.04886	9.88316e-05	O43143	Putative pre-mRNA-splicing factor ATP-dependent RNA helicase DHX15	40	2.10269	1.99161	2.05228	3
S100A8	2.04683	0.00450527	P05109	Protein S100-A8;Protein S100-A8, N-terminally processed	2	2.48674	1.60692	NA	2
DHX37	2.04457	0.00117576	F5H3Y4;Q8IY37	Probable ATP-dependent RNA helicase DHX37	6	1.5773	2.67778	1.87865	3
USP39	2.03702	9.88316e-05	A0A087X1B2;B9A018;Q53GS9-2;Q53GS9;Q53GS9-3;A0A087WW31	U4/U6.U5 tri-snRNP-associated protein 2	9	2.1152	2.01767	1.9782	3
LUC7L2	2.03357	0.000204679	Q9Y383;A0A0A6YYC3;Q96HJ9-2;A0A0A6YYJ8;Q9Y383-3;Q9Y383-2;V9GZ75;F8WEU3	Putative RNA-binding protein Luc7-like 2	11	2.28989	1.72325	2.08756	3
AQR	2.03183	0.000405232	O60306;H0YH15	Intron-binding protein aquarius	18	2.22934	1.58121	2.28493	3
ALKBH5	2.02942	0.000112821	Q6P6C2;Q6P6C2-1;Q6P6C2-3	RNA demethylase ALKBH5	12	2.01486	1.87802	2.19538	3
PBX1	2.02493	0.000312144	H0YKH1;A0A087X0P4;H0YLF5;A0A0A0MTI0;P40424-2;P40424-3;P40424;H0YLD4;H0YLT4;F8WA05;H0YLB0;H0YLM3	Pre-B-cell leukemia transcription factor 1	4	2.07485	1.65485	2.34508	3
IRF2BP1	2.02383	0.000159905	Q8IU81	Interferon regulatory factor 2-binding protein 1	3	1.94167	1.83155	2.29828	3
APEX1	2.02201	0.000140513	P27695;G3V3M6;G3V5Q1;G3V3C7;A0A0C4DGK8;G3V5D9;G3V5M0;G3V359;G3V3Y6;G3V2D9;H7C4A8	DNA-(apurinic or apyrimidinic site) lyase;DNA-(apurinic or apyrimidinic site) lyase, mitochondrial	9	2.08301	2.20119	1.78182	3
SRSF3	2.02051	0.000138598	P84103-2;P84103;A0A087X2D0	Serine/arginine-rich splicing factor 3	8	1.83443	1.97765	2.24945	3
HNRNPUL2;HNRNPUL2-BSCL2	2.02024	0.000369099	Q1KMD3;H3BQZ7	Heterogeneous nuclear ribonucleoprotein U-like protein 2	9	1.72111	2.43954	1.90006	3
PHF10	2.01903	0.000120318	S5FZ81;Q8WUB8-3;Q8WUB8-2;Q8WUB8	PHD finger protein 10	5	1.96931	2.21341	1.87436	3
PTBP2	2.01527	0.000146356	Q9UKA9;Q9UKA9-2;Q9UKA9-4;Q9UKA9-3;Q9UKA9-5;Q9UKA9-6	Polypyrimidine tract-binding protein 2	4	1.82212	1.96277	2.26093	3
MYBBP1A	2.01211	0.000168973	Q9BQG0;Q9BQG0-2;I3L1L3;I3L2H8;I3L311	Myb-binding protein 1A	27	1.75185	2.25093	2.03355	3
SNRPB2	2.0105	0.000582543	P08579	U2 small nuclear ribonucleoprotein B	4	2.09599	NA	1.92501	2
HNRNPH1	2.00887	0.000136501	G8JLB6;P31943;E9PCY7;H0YB39;H0YBD7;D6RBM0;E7EN40;E5RGV0;D6RIU0;D6RFM3;D6RIT2;E7EQJ0;D6RAM1;D6R9T0;D6RDU3;D6RJ04;D6RIH9;H0YBG7;D6RDL0;D6RF17;E5RGH4;E5RJ94;D6R9D3;H0YAQ2	Heterogeneous nuclear ribonucleoprotein H;Heterogeneous nuclear ribonucleoprotein H, N-terminally processed	22	1.81303	2.21872	1.99487	3
WDHD1	2.00623	0.00732719	O75717;O75717-2;C9JYB3	WD repeat and HMG-box DNA-binding protein 1	6	1.49103	NA	2.52143	2
GTF3C5	2.00573	0.00014778	Q5T7U1;Q9Y5Q8-2;Q9Y5Q8;Q9Y5Q8-3;Q5T7U0;Q5T7U4;H7BY84	General transcription factor 3C polypeptide 5	5	1.76184	2.20079	2.05457	3
TOX4	2.00264	0.000181311	O94842-3;O94842-2;O94842;O94900;O15405-2;O15405;Q96NM4-3;Q96NM4;Q96NM4-4;Q96NM4-2	TOX high mobility group box family member 4	5	2.29734	1.80954	1.90103	3
RBM22	2.00002	0.000138073	Q9NW64-2;Q9NW64;E5RJW4;E5RHA8	Pre-mRNA-splicing factor RBM22	9	1.98149	2.21288	1.80571	3
SRSF4	1.99896	0.00101033	A0A0D9SEM4;Q08170	Serine/arginine-rich splicing factor 4	9	NA	2.18986	1.80806	2
ACTL6A	1.99807	0.000689632	O96019;O96019-2;H7C5S0;C9JQT2;O94805	Actin-like protein 6A	10	2.45473	1.52246	2.01703	3
PPM1G	1.99726	9.88316e-05	O15355	Protein phosphatase 1G	18	1.91716	2.04747	2.02715	3
POGZ	1.99609	0.000132147	Q7Z3K3-5;Q7Z3K3-7;Q7Z3K3-2;Q7Z3K3-3;Q7Z3K3-6;Q7Z3K3;H0YCT3	Pogo transposable element with ZNF domain	11	1.78522	2.16816	2.03488	3
BUB3	1.99529	0.000215195	J3QT28;O43684-2;O43684;J3QSX4	Mitotic checkpoint protein BUB3	9	1.66698	2.19931	2.11959	3
THOC5	1.99337	0.000189216	Q13769;H7C441;C9JXG5;F8WCP5;C9JXU6;F5GZF3;C9JCL9;H7C072	THO complex subunit 5 homolog	3	1.69546	2.20304	2.08161	3
EYA3	1.99021	0.000100339	Q99504-5;Q99504;Q99504-4;Q99504-3;Q99504-2;B1APR7	Eyes absent homolog 3	12	2.10256	1.86794	2.00014	3
CBX5	1.98494	0.000107273	P45973;F8VNY3	Chromobox protein homolog 5	5	1.85	1.99776	2.10705	3
SMARCD1;SMARCD3;SMARCD2	1.98234	0.000168973	Q96GM5;F8VZ70;F8VUB0;Q96GM5-2;F8VW95;C9JYI7;F8VRQ4;J3KMX2;B9EGA3;Q6STE5-2;Q92925-3;Q6STE5;Q92925-2;Q92925;H0YHV1	SWI/SNF-related matrix-associated actin-dependent regulator of chromatin subfamily D member 1;SWI/SNF-related matrix-associated actin-dependent regulator of chromatin subfamily D member 3;SWI/SNF-related matrix-associated actin-dependent regulator of chromatin subfamily D member 2	4	1.77231	2.24762	1.9271	3
ZFR	1.98172	9.88316e-05	Q96KR1;H0Y8W1	Zinc finger RNA-binding protein	40	1.90524	2.04883	1.9911	3
CUX1	1.97873	0.00968954	P39880-6;P39880-4;P39880-5;P39880-2;P39880;P39880-3	Homeobox protein cut-like 1	3	2.5403	NA	1.41716	2
LARP7	1.97833	0.000119611	Q4G0J3;Q4G0J3-3;H0YA82;D6RFF0;Q4G0J3-2;D6R9Z6;D6RF49;D6RAF3	La-related protein 7	12	1.81991	1.97273	2.14235	3
CTCF	1.97799	9.88316e-05	P49711	Transcriptional repressor CTCF	2	1.93221	1.90739	2.09437	3
U2AF1;U2AF1L4	1.97782	0.000119291	P0DN76;Q01081;Q01081-2;Q01081-4;Q8WU68-3;Q8WU68;K7EJH3;K7EJM7;M0QYK5;M0R2N4;Q01081-3;Q8WU68-2	Splicing factor U2AF 35 kDa subunit;Splicing factor U2AF 26 kDa subunit	6	1.83419	2.14997	1.94931	3
SPEN	1.96947	9.88316e-05	Q96T58;H0Y5U7;F6WRY4	Msx2-interacting protein	33	2.03868	1.93006	1.93968	3
GATAD2A	1.96827	0.000246617	Q86YP4-2;Q86YP4;Q86YP4-3;V9GYX5;C9JVY3;V9GY85;H7C3H1;C9JMI3;C9JGN4;C9JHD7;C9JJK9	Transcriptional repressor p66-alpha	8	1.87125	2.30185	1.7317	3
ZNF638	1.96704	0.00149081	Q14966-3;Q14966;Q14966-4;A0A096LPH6;Q14966-2;Q14966-5;A0A096LNR2;A0A096LNX0;A0A096LPI0;A0A096LNQ0;A0A096LPB4;C9JWN0	Zinc finger protein 638	7	1.44276	1.86794	2.59043	3
NCOR1	1.96507	0.000588695	O75376;O75376-2;A0A088AWL3;E7EVK1;C9JAP0;E7EVU5;E7EW50;J3KS51;J3KT44	Nuclear receptor corepressor 1	13	2.2224	2.20433	1.46848	3
ARID1B	1.95686	0.000131119	Q8NFD5;Q8NFD5-2;Q8NFD5-3;H0Y7H8;Q8NFD5-4;H0Y2R3;H0Y3S9;A0A0J9YY80	AT-rich interactive domain-containing protein 1B	17	2.00594	2.10712	1.75754	3
TFIP11	1.95656	0.000128329	Q9UBB9;Q9UBB9-2;F6SQZ1;F6XM96;F6UKU9;H0Y4U8;F6UQ07	Tuftelin-interacting protein 11	16	1.89674	1.82138	2.15157	3
FUS	1.95553	0.000131119	P35637-2;P35637;H3BPE7	RNA-binding protein FUS	13	1.94265	1.78237	2.14156	3
SUGP1	1.955	0.000150933	Q8IWZ8;V9GZ08;B4DVK3;Q8IWZ8-2;K7ESM0;K7EM86;K7ELR6	SURP and G-patch domain-containing protein 1	10	1.79002	1.87381	2.20116	3
PAXBP1	1.95426	0.000209599	Q9Y5B6;Q9Y5B6-2;Q9Y5B6-4;Q9Y5B6-3	PAX3- and PAX7-binding protein 1	12	1.99671	1.66339	2.20267	3
PAPOLA;PAPOLB	1.95108	0.000213652	G3XAH6;P51003;P51003-2;Q9NRJ5;H0YJ00;A0A0C4DGK1;G3V3I9;G3V457;H7C3W0;F8WAT4;G3V2A0;Q9BWT3-2;Q9BWT3	Poly(A) polymerase alpha;Poly(A) polymerase beta	6	2.1158	1.63404	2.1034	3
NFYA	1.94989	0.000168973	P23511-2;P23511	Nuclear transcription factor Y subunit alpha	1	1.68401	2.12078	2.04488	3
SLTM	1.94814	9.88316e-05	H0YLW7;H0YMW8;H0YNF3;H0YMR6;H0YLE6;H0YL55;H7BXE3;Q9NWH9	SAFB-like transcription modulator	2	1.97732	1.93851	1.92858	3
GPKOW	1.94655	0.000434157	Q92917	G patch domain and KOW motifs-containing protein	7	2.29746	1.99632	1.54587	3
MED12;TNRC11	1.94639	0.00057593	Q93074-3;Q93074;Q93074-2;Q7Z3Z5;H7C191;F8WAE6;Q86YW9-4;Q86YW9	Mediator of RNA polymerase II transcription subunit 12	11	1.99516	NA	1.89763	2
DDX21	1.94607	0.000386168	Q9NR30;Q9NR30-2	Nucleolar RNA helicase 2	26	1.53297	2.10986	2.19538	3
ASUN	1.94451	0.00907311	Q9NVM9;Q9NVM9-2;F5H5W1;F5H457;H0YH12;F8VRX9	Protein asunder homolog	6	NA	2.48135	1.40768	2
NOP56	1.94172	0.000252898	O00567;H0YDU4;H0Y653;Q5JXT2	Nucleolar protein 56	16	1.64975	1.93486	2.24056	3
NCAPH2	1.941	0.00195108	H0YC55;A0A0A6YYG7;Q6IBW4-2;Q6IBW4;Q6IBW4-4	Condensin-2 complex subunit H2	3	1.66325	2.21875	NA	2
PDS5A	1.93929	0.000119089	Q29RF7;Q29RF7-3;H0Y9L6;H0Y9L9	Sister chromatid cohesion protein PDS5 homolog A	18	2.02492	2.02326	1.76969	3
SP1	1.93926	0.000116008	H3BUU5;P08047-3;P08047	Transcription factor Sp1	1	1.96492	1.78923	2.06364	3
FKBP5	1.93918	0.000131119	Q13451;Q13451-2	Peptidyl-prolyl cis-trans isomerase FKBP5	14	1.86967	1.80904	2.13881	3
ORC2	1.93287	0.000911453	Q13416	Origin recognition complex subunit 2	3	2.08913	1.77661	NA	2
RPL13	1.9312	0.000591554	P26373;H3BUK8;J3KS98;J3QSB4;P26373-2	60S ribosomal protein L13	2	NA	1.98328	1.87912	2
DIS3	1.92006	0.000349701	Q9Y2L1;G3V1J5;Q9Y2L1-2;F2Z2C0	Exosome complex exonuclease RRP44	28	1.53809	2.1838	2.0383	3
MCM7	1.91925	0.00417663	P33993;P33993-3;P33993-2;C9J8M6	DNA replication licensing factor MCM7	10	1.07717	2.53993	2.14065	3
HDGF	1.91534	0.00805687	P51858;P51858-2;P51858-3	Hepatoma-derived growth factor	13	2.39988	0.872632	2.4735	3
KDM3B	1.91486	0.000268098	Q7LBC6;Q7LBC6-2;H0Y9V5;Q7LBC6-3	Lysine-specific demethylase 3B	7	1.98692	1.58732	2.17034	3
ZNF8;RANBP3	1.91017	0.000124157	B7Z7F3;Q9H6Z4-3;Q9H6Z4-2;Q9H6Z4;K7EIJ4;K7ESQ0;K7EMH9;K7ENJ2;K7EID7;K7ENB9;K7EPW1;K7EN31	Ran-binding protein 3	9	1.77783	1.88037	2.07231	3
ARID3B	1.90991	0.000136501	Q8IVW6-4;Q8IVW6;Q8IVW6-3;H3BQ92;K7EJ04;Q99856	AT-rich interactive domain-containing protein 3B	4	1.95133	2.06333	1.71506	3
HNRNPH3	1.90973	9.88316e-05	P31942-2;P31942;P31942-3;P31942-4;P31942-6;P31942-5	Heterogeneous nuclear ribonucleoprotein H3	13	1.98779	1.86196	1.87943	3
HNRNPF	1.90966	0.000204926	P52597	Heterogeneous nuclear ribonucleoprotein F;Heterogeneous nuclear ribonucleoprotein F, N-terminally processed	18	1.65453	1.90774	2.16672	3
GPATCH4	1.90625	0.000591554	Q5T3I0;Q5T3I0-3;A0A0A0MRK1;E9PAV9;E9PPY4;F2Z3C6;F8W895;Q5T3I0-2	G patch domain-containing protein 4	4	1.87735	NA	1.93516	2
CXorf57	1.90485	0.000603542	Q6NSI4;Q6NSI4-4;B1AQ74;Q6NSI4-3;Q6NSI4-2	Uncharacterized protein CXorf57	3	NA	1.8641	1.94561	2
PHF8	1.90054	0.00069304	H0Y3N9;Q9UPP1-5;Q9UPP1-2;Q9UPP1;H0Y589;Q9UPP1-4;Q9UPP1-3;H0Y7M8;H7BZB7	Histone lysine demethylase PHF8	4	NA	1.98961	1.81147	2
PHAX	1.90028	0.000131119	Q9H814	Phosphorylated adapter RNA export protein	7	1.73509	2.05974	1.90601	3
TARDBP	1.89795	9.88316e-05	Q13148;A0A087WX29;B1AKP7;G3V162;A0A087X260;A0A087WYY0;K7EJM5;K7EN94;Q13148-4;A0A087WW61;A0A087WX67;A0A087WXV3;A0A087WXQ5;A0A087WV68;A0A087WZC9;A0A087WTZ4;K7EL26;A0A087WYE7	TAR DNA-binding protein 43	6	1.82224	1.94054	1.93108	3
AATF	1.89513	9.88509e-05	Q9NY61;A0A087WWS8;A0A087WW41;A0A087WTH8	Protein AATF	8	1.96514	1.90647	1.81377	3
PTBP1	1.89255	0.000138678	P26599;P26599-2;P26599-3;A6NLN1;A0A0U1RRM4;A0A0D9SF20;K7EKJ7;K7ES59;A0A087WU68;K7EK45;K7ELW5;A0A087WUW5	Polypyrimidine tract-binding protein 1	26	1.96014	1.69162	2.02588	3
YLPM1	1.89168	0.000159905	P49750-4;P49750;P49750-3;H0YIQ2;F8VU51;H0YI23;U3KQT9	YLP motif-containing protein 1	47	2.11187	1.69448	1.86869	3
KRI1	1.88847	0.000107744	Q8N9T8;H0YG91;H0YFD2;H0YH26;F8WFC1	Protein KRI1 homolog	8	1.90261	1.98072	1.78207	3
RCC2	1.88671	0.000109195	Q9P258	Protein RCC2	16	1.90816	1.76969	1.98229	3
ILKAP	1.88185	0.000120318	Q9H0C8;E9PC05;F8SNU7;F8SNU6;H7C2I8	Integrin-linked kinase-associated serine/threonine phosphatase 2C	5	1.7995	2.03689	1.80917	3
BMS1	1.88104	0.000159734	Q14692	Ribosome biogenesis protein BMS1 homolog	8	2.11869	1.75975	1.76469	3
NUMA1	1.87575	0.000297677	Q14980-2;Q14980;A0A087WY61;Q14980-4;Q14980-3;H0YFY6;K4DIE0;Q14980-5;F5H4J1;F5H6Y5	Nuclear mitotic apparatus protein 1	18	1.52867	2.0251	2.07348	3
POM121C;POM121	1.87551	0.00176002	C9JFL1;A0A087WY75;A0A075B7F8;Q96HA1-2;A8CG34-2;Q96HA1-3;A8CG34;Q96HA1	Nuclear envelope pore membrane protein POM 121;Nuclear envelope pore membrane protein POM 121C	1	1.63259	2.11843	NA	2
BAZ1B	1.87547	0.000116008	Q9UIG0-2;Q9UIG0	Tyrosine-protein kinase BAZ1B	31	1.80319	2.01085	1.81238	3
CDK9	1.87339	0.000615614	P50750;P50750-2;X6RE90	Cyclin-dependent kinase 9	3	1.89794	NA	1.84884	2
USP7	1.8726	0.000259157	Q93009-3;Q93009;H3BND8;F5H2X1;H3BUV0;H3BTM1;H3BRA2;H3BQD1;H3BMF6	Ubiquitin carboxyl-terminal hydrolase 7;Ubiquitin carboxyl-terminal hydrolase	35	1.67897	1.743	2.19582	3
TRMT6	1.87171	0.000114517	Q9UJA5;Q9UJA5-4;Q9UJA5-2;Q9UJA5-3	tRNA (adenine(58)-N(1))-methyltransferase non-catalytic subunit TRM6	6	1.99682	1.84242	1.77589	3
RNF2	1.87085	0.000252878	X6RFN3;Q99496;Q99496-2;Q06587-2;Q06587	E3 ubiquitin-protein ligase RING2	4	1.64695	1.78609	2.17951	3
NELFE	1.87031	0.000150933	P18615;P18615-3;A0A0A0MT02;A0A0A0MSN9;P18615-4;A2ABK4;A0A0G2JI50;E9PD43	Negative elongation factor E	8	1.96266	1.64662	2.00166	3
FOXK1	1.86559	0.000129348	P85037;P85037-2;U3KQ26	Forkhead box protein K1	7	1.84081	2.02492	1.73105	3
EWSR1	1.86223	0.000127853	B0QYK0;Q01844-6;Q01844-3;Q01844;Q01844-5;A0A0D9SFL3;C9JGE3;Q01844-2;H7BY36;F8WC90;Q01844-4	RNA-binding protein EWS	10	1.90778	1.70155	1.97735	3
GABPA	1.86095	0.00067267	Q06546	GA-binding protein alpha chain	3	NA	1.80451	1.91739	2
FANCI	1.86007	0.000207753	Q9NVI1;F8W7R3;Q9NVI1-2;Q9NVI1-1;H3BP78;H3BT54;H3BMG4;Q9NVI1-4;H3BQE2;H3BS60;H3BN35	Fanconi anemia group I protein	15	1.69582	1.74283	2.14156	3
TAF15	1.85816	0.000333583	Q92804-2;Q92804;A0A075B7D9;A0A075B7F2;A0A075B7E4	TATA-binding protein-associated factor 2N	6	1.64298	1.71211	2.2194	3
WDR36	1.85717	0.000252977	A0A0A0MTB8;Q8NI36	WD repeat-containing protein 36	12	1.57792	1.86979	2.1238	3
DNMT1	1.84358	0.000150933	P26358;P26358-2;P26358-3;K7ENW7;K7EJL0;K7EMU8;K7EIZ6;K7ENQ6	DNA (cytosine-5)-methyltransferase 1	29	1.65526	2.02496	1.85052	3
SCAF11	1.84221	0.00012147	F8VXG7;Q99590-2;Q99590;A0A0A0MTP7;A0A087WTB7	Protein SCAF11	8	1.78157	1.98437	1.76069	3
SIRT1	1.84016	0.000136501	Q96EB6;B0QZ35;E9PC49;Q96EB6-2	NAD-dependent protein deacetylase sirtuin-1;SirtT1 75 kDa fragment	6	1.9953	1.84435	1.68082	3
FANCD2	1.83878	0.000905705	Q9BXW9;Q9BXW9-1;Q9BXW9-3;Q9BXW9-4;H7BZJ7	Fanconi anemia group D2 protein	7	1.71356	NA	1.96399	2
BOD1L1	1.83611	0.000140513	Q8NFC6;H0Y9Y2	Biorientation of chromosomes in cell division protein 1-like 1	11	1.90477	1.64584	1.95773	3
PRPF31	1.83561	0.000847333	Q8WWY3;E7EVX8;Q8WWY3-4;Q8WWY3-2;Q8WWY3-3;E7EU94;E7ESX0;E7EN72	U4/U6 small nuclear ribonucleoprotein Prp31	9	1.50452	2.34449	1.65782	3
SMARCA1	1.83437	0.000182058	A0A0A0MRP6;B7ZLQ5;P28370-2;P28370	Probable global transcription activator SNF2L1	15	1.76757	2.07584	1.6597	3
FOXC1	1.83237	0.000603645	Q12948;O43638;Q99958	Forkhead box protein C1	7	2.27587	1.70421	1.51702	3
MSH2	1.83183	9.88316e-05	P43246;P43246-2;V9H019;E9PHA6;A0A087X078;A0A087X1E7;V9H0B2;V9H015;C9J809	DNA mismatch repair protein Msh2	17	1.82306	1.85416	1.81828	3
QSER1	1.83023	0.000655756	Q2KHR3-2;Q2KHR3;H0YCQ7;E9PQD3	Glutamine and serine-rich protein 1	7	1.83131	NA	1.82916	2
NKRF	1.8292	0.000428953	O15226;O15226-2;A0A087WXT2	NF-kappa-B-repressing factor	18	1.50452	2.18777	1.79531	3
PDCD11	1.82764	0.000140723	Q14690;S4R3Q4	Protein RRP5 homolog	38	1.66257	1.99349	1.82684	3
ZNF326	1.82144	0.00413208	Q5BKZ1;A0A0A0MRN4;Q5BKZ1-2;Q5BKZ1-3	DBIRD complex subunit ZNF326	5	1.2461	2.61582	1.60241	3
DDX51	1.81892	0.000172499	Q8N8A6	ATP-dependent RNA helicase DDX51	8	1.66957	2.04994	1.73725	3
NOP14	1.81885	0.000832999	E9PFK5;P78316-2;P78316	Nucleolar protein 14	7	1.5037	2.32034	1.6325	3
PBRM1	1.81437	0.00509747	Q86U86-5;Q86U86-4;Q86U86-7;Q86U86-3;Q86U86-9;Q86U86-2;Q86U86-8;Q86U86;E7EVG2;H0Y5B5;Q86U86-6;C9JPI5;C9JQF1;C9J053	Protein polybromo-1	29	2.40057	0.96798	2.07457	3
NASP	1.8094	0.000125894	P49321;P49321-3;P49321-4;P49321-2;Q5T624;E9PPR5;H0YDS9;E9PI86;E9PRH9;H0YF33;E9PPQ8;E9PNB5	Nuclear autoantigenic sperm protein	22	1.90981	1.67609	1.8423	3
DIDO1	1.80355	0.000114517	Q9BTC0;Q9BTC0-1;Q9BTC0-2;Q9BTC0-3	Death-inducer obliterator 1	16	1.87448	1.70805	1.8281	3
RBM8A	1.80055	0.000249748	Q9Y5S9;Q9Y5S9-2;A0A0J9YW13	RNA-binding protein 8A	5	1.93104	1.50665	1.96395	3
KNOP1	1.79915	0.0015068	Q1ED39;H3BMC9;H3BPL4;H3BNU8	Lysine-rich nucleolar protein 1	5	1.99783	NA	1.60046	2
NXF1	1.79579	0.00779228	E9PIN3;Q9UBU9;Q9UBU9-2;B4E227;E9PLA7;E9PMV7	Nuclear RNA export factor 1	5	1.33617	2.25541	NA	2
TRMT1	1.7949	0.000615614	Q9NXH9-2;Q9NXH9;K7EQQ8;K7EQY6;K7ENI9;K7ERR5;K7EQU7	tRNA (guanine(26)-N(2))-dimethyltransferase	6	1.61974	2.2383	1.52667	3
HNRNPDL	1.79486	0.000102767	A0A087WUK2;O14979	Heterogeneous nuclear ribonucleoprotein D-like	20	1.77539	1.81159	1.79759	3
NOSIP	1.79283	0.00105211	M0R3B2;Q9Y314;A0A075B797;A0A075B6F9;M0QX85;M0R1K2	Nitric oxide synthase-interacting protein	3	1.65508	NA	1.93059	2
ORC3	1.78755	0.000697575	Q9UBD5-3;Q9UBD5;Q9UBD5-2	Origin recognition complex subunit 3	4	NA	1.784	1.79111	2
HLTF	1.78408	0.000319772	A0A0C4DGA6;Q14527-2;Q14527;H7C5K0	Helicase-like transcription factor	6	1.51349	2.08519	1.75356	3
PPP4C	1.78086	0.000480866	P60510;H3BTA2;H3BV22;I3L4X0;H3BPN5;H3BVE3	Serine/threonine-protein phosphatase 4 catalytic subunit;Serine/threonine-protein phosphatase	7	2.17191	1.52316	1.6475	3
MBNL1	1.77696	0.000186009	C9JP00;A0A0A0MQX8;Q9NR56;Q9NR56-3;Q9NR56-4;Q9NR56-7;Q9NR56-6;Q9NR56-2;Q9NR56-5;O95205;H7C4T5;Q86VM6;Q5VZF2-3;Q5VZF2-2;Q5VZF2	Muscleblind-like protein 1	3	1.81836	1.9568	1.55572	3
ELAVL1	1.77645	0.000140087	Q15717;Q15717-2;M0QZR9;M0R055;B1APY9;B1APY8;A0A0R4J2E6;P26378-4;P26378-2;P26378-5;P26378;P26378-3	ELAV-like protein 1	17	1.61565	1.81926	1.89445	3
PRC1	1.77392	0.00524787	O43663;O43663-2;O43663-4;O43663-3;H0YM42;H0YLA0;H0YL53;G3V3N7	Protein regulator of cytokinesis 1	6	2.49465	1.80826	1.01885	3
IRF2BP2	1.77327	0.000555125	Q7Z5L9-2;Q7Z5L9	Interferon regulatory factor 2-binding protein 2	6	1.88975	2.06543	1.36463	3
RBM5	1.7718	0.00156824	P52756;C9JFQ5;P52756-4;P52756-2;P52756-5;C9J9P7;F8WE23;C9JR02;F8W910;P52756-3	RNA-binding protein 5	19	2.37212	1.45502	1.48826	3
UBTF	1.76861	0.000202519	E9PKP7;P17480-2;P17480;E9PMM2;E9PLT2	Nucleolar transcription factor 1	14	1.91292	1.52201	1.8709	3
DDX24	1.76765	0.0010685	G3V529;Q9GZR7;A0A087WXU8;F5GYL3;Q9GZR7-2	ATP-dependent RNA helicase DDX24	5	1.36194	2.26772	1.67329	3
RBFOX2;RBFOX1;RBFOX3	1.76493	0.000228013	O43251-6;O43251-8;B0QYV1;A0A0G2JRA5;O43251-5;O43251-10;O43251-2;O43251;S4R469;F8VR27;F8VZY7;B0QYY4;A0A087X2B1;J3KNW3;B7Z1U7;F8VZG9;O43251-9;Q9NWB1-3;O43251-4;Q9NWB1-4;Q9NWB1-5;Q9NWB1;O43251-7;Q9NWB1-2;I3L1D4;A0A0G2JSB3;B0QYY7;A0A0G2JRD1;S4R3K7;J3QRF4;A6NFN3;A6NFN3-2;O43251-3;J3QQZ2;F8VRS4;B0QYY6;F5H0M1	RNA binding protein fox-1 homolog 2;RNA binding protein fox-1 homolog;RNA binding protein fox-1 homolog 1;RNA binding protein fox-1 homolog 3	8	1.77349	1.99324	1.52807	3
ZNF346	1.76406	0.00113047	D6RJ07;Q9UL40-3;Q9UL40;B7Z4J8;Q9UL40-2;B7Z4N4;B7Z6B6;B7Z6Q2	Zinc finger protein 346	4	1.90543	NA	1.6227	2
POLA1	1.76385	0.000363039	A0A087WU64;A6NMQ1;P09884	DNA polymerase;DNA polymerase alpha catalytic subunit	26	1.8425	1.43205	2.017	3
ADAR	1.75997	0.000165792	P55265-5;P55265;P55265-4;H0YCK3;P55265-2;P55265-3	Double-stranded RNA-specific adenosine deaminase	37	1.55934	1.83139	1.88916	3
CREBBP	1.75995	0.00082389	Q92793-2;Q92793;I3L466;I3L3I5	CREB-binding protein	4	1.82766	NA	1.69225	2
BAZ1A	1.75974	0.000153052	Q9NRL2;Q9NRL2-2;A0A087WWN7;H0YJP5	Bromodomain adjacent to zinc finger domain protein 1A	13	1.58424	1.91158	1.78341	3
ISY1	1.75715	0.000181143	Q9ULR0;Q9ULR0-2;Q9ULR0-1;A8MVI5;H0YA89;D6RC18	Pre-mRNA-splicing factor ISY1 homolog	5	1.97662	1.67247	1.62237	3
PINX1	1.75527	0.000838784	Q96BK5;E5RJG9;E5RGR1;Q9BT81-2;A0A0A6YYK5;Q96BK5-2	PIN2/TERF1-interacting telomerase inhibitor 1	2	1.68455	NA	1.82599	2
RFX1	1.75445	0.000312144	P22670;H0Y7W5;P48378-2;P48380-2;P48378;P48380	MHC class II regulatory factor RFX1	7	1.76926	1.47306	2.02102	3
PCYT1A;PCYT1B	1.75208	0.000140513	C9JEJ2;P49585;C9J050;H7BZN1;H7C1T3;Q9Y5K3-2;Q9Y5K3-4;Q9Y5K3-3;Q9Y5K3;C9JVS0;C9JPY0;F8WAZ5;C9J2E1	Choline-phosphate cytidylyltransferase A;Choline-phosphate cytidylyltransferase B	8	1.87845	1.60379	1.774	3
WAPAL	1.75206	0.000230941	Q7Z5K2;Q7Z5K2-2;Q7Z5K2-3;Q8WVX6	Wings apart-like protein homolog	11	1.73218	1.99233	1.53167	3
BAZ2A	1.75001	0.00022639	J3KPG5;F8VU39;Q9UIF9-2;Q9UIF9-3;Q9UIF9;A0A0C4DGI9;H0YII3	Bromodomain adjacent to zinc finger domain protein 2A	5	1.69524	1.55508	1.99971	3
KIF4A	1.74923	0.000132147	O95239;O95239-2;Q2VIQ3	Chromosome-associated kinesin KIF4A	20	1.66748	1.88632	1.6939	3
LMNB2	1.74857	0.000189216	J9JID7;Q03252	Lamin-B2	17	1.68185	1.97199	1.59187	3
NCBP1	1.74795	0.000204679	Q09161;X6R941	Nuclear cap-binding protein subunit 1	12	1.75962	1.952	1.53222	3
UTP14A	1.74345	0.000284274	Q9BVJ6-3;Q9BVJ6;Q9BVJ6-2;X6RJY0;Q5TAP6	U3 small nucleolar RNA-associated protein 14 homolog A	11	1.79681	1.97093	1.46263	3
DDX54	1.74258	0.00207193	Q8TDD1;Q8TDD1-2;F8VRX4	ATP-dependent RNA helicase DDX54	3	1.50975	NA	1.97541	2
NCOA5	1.74028	0.000386168	Q9HCD5;Q5JY17	Nuclear receptor coactivator 5	11	1.72023	2.05127	1.44932	3
THOC2	1.739	0.000182032	A0A0C4DG98;Q8NI27;H0Y815;Q8NI27-2	THO complex subunit 2	17	1.52667	1.88386	1.80649	3
NSUN2	1.73749	0.00011732	Q08J23-2;Q08J23;Q08J23-3;A0A140T9Y7	tRNA (cytosine(34)-C(5))-methyltransferase	19	1.71853	1.80285	1.69109	3
HEXIM1	1.7324	0.000182241	O94992;Q96MH2	Protein HEXIM1	6	1.94557	1.65416	1.59746	3
TCOF1	1.72942	0.000194149	Q13428-3;E7ETY2;Q13428-8;Q13428-7;Q13428;Q13428-4;J3KQ96;Q13428-2;Q13428-6;Q13428-5;H0YA99	Treacle protein	25	1.95702	1.61829	1.61297	3
THOC1	1.72926	0.000573412	A0A087WWS1;Q96FV9;R4GMN4;Q96FV9-2;J3KT14;A0A087WY84;J3KRD7;J3QQZ3	THO complex subunit 1	7	1.68504	2.10461	1.39813	3
ACIN1	1.72806	0.000125894	S4R3H4;E7EQT4;Q9UKV3-5;Q9UKV3;G3V3B0;Q9UKV3-3;Q9UKV3-2;G3V3T3	Apoptotic chromatin condensation inducer in the nucleus	16	1.81295	1.73366	1.63756	3
SUGP2	1.72385	0.000249748	M0R3F6;M0R2Z9;Q8IX01-4;Q8IX01-3;Q8IX01;M0R065;M0R216	SURP and G-patch domain-containing protein 2	7	1.45528	1.86908	1.8472	3
FEN1	1.72194	0.000567226	P39748;P39748-2;I3L3E9;F5H1Y3;CON__P01030;CON__ENSEMBL:ENSBTAP00000007350	Flap endonuclease 1	7	1.66839	2.09721	1.40021	3
DGCR14	1.7213	0.00453522	Q96DF8;F8WEF8	Protein DGCR14	6	2.41986	1.69385	1.05019	3
UBR5	1.71727	0.000167992	E7EMW7;O95071-2;O95071;E5RFK7;E7ET84	E3 ubiquitin-protein ligase UBR5	15	1.70142	1.88947	1.56091	3
HOXA5	1.71655	0.00114665	P20719	Homeobox protein Hox-A5	2	1.84414	NA	1.58895	2
INTS1	1.71414	0.000962261	Q8N201	Integrator complex subunit 1	9	1.80314	NA	1.62513	2
TCEAL4	1.71039	0.000911453	Q96EI5;Q96EI5-2;D6RD44;A2RQR6;J3KQY4;D6RHZ1;D6RIH3;D6RCE9;Q9H3H9	Transcription elongation factor A protein-like 4	4	1.63733	1.78346	NA	2
HAT1	1.70766	0.000140513	O14929;O14929-2;F8W9G7;F8WEW1	Histone acetyltransferase type B catalytic subunit	11	1.76541	1.56491	1.79265	3
TRIM33	1.69164	0.000140087	E7EN20;Q9UPN9;H0Y612	E3 ubiquitin-protein ligase TRIM33	11	1.63817	1.82236	1.61438	3
HNRNPH2	1.69087	0.000867633	P55795	Heterogeneous nuclear ribonucleoprotein H2;Heterogeneous nuclear ribonucleoprotein H2, N-terminally processed	15	1.42202	2.15536	1.49523	3
UTP20	1.69001	0.000169124	O75691	Small subunit processome component 20 homolog	37	1.78923	1.50559	1.77522	3
ZNF318	1.68989	0.000434157	Q5VUA4-2;Q5VUA4	Zinc finger protein 318	3	2.0404	1.52532	1.50396	3
TLK2	1.68986	0.000347373	J3KRK0;J3QLK5;Q86UE8-3;Q86UE8-2;Q86UE8;J3QQN4;J3QS44	Serine/threonine-protein kinase tousled-like 2	5	1.59684	1.47664	1.9961	3
ZMYM4	1.68985	0.000345203	Q5VZL5-4;Q5VZL5;H7C1I7;Q5VZL5-3;Q5VZL5-2	Zinc finger MYM-type protein 4	4	1.38228	1.79527	1.892	3
PRIM2	1.68455	0.000254383	P49643;A0A096LP51;P49643-2	DNA primase large subunit	5	1.53127	1.57937	1.94302	3
PUS7	1.6843	0.00014954	Q96PZ0;E7EUH7	Pseudouridylate synthase 7 homolog	14	1.83479	1.59917	1.61894	3
NOC3L	1.68239	0.000862435	Q8WTT2	Nucleolar complex protein 3 homolog	4	1.70682	NA	1.65796	2
SMARCC2	1.68077	0.00544505	F8VXC8;Q8TAQ2-2;Q8TAQ2-3;Q8TAQ2	SWI/SNF complex subunit SMARCC2	17	1.75018	2.34622	0.945907	3
NOP58	1.67835	0.000191317	Q9Y2X3;H7BZ72	Nucleolar protein 58	12	1.4845	1.71321	1.83734	3
TRIM24	1.67591	0.000847333	O15164-2;O15164;A0A087X1V3	Transcription intermediary factor 1-alpha	10	1.46472	2.13166	1.43136	3
POP1	1.67024	0.000338593	Q99575;E5RK39	Ribonucleases P/MRP protein subunit POP1	6	1.73057	1.89732	1.38283	3
CDKN2AIP	1.66587	0.000821969	Q9NXV6	CDKN2A-interacting protein	3	1.71299	2.02726	1.25737	3
RACGAP1	1.66544	0.000186009	Q9H0H5;H0YIK5;F8VRD2;F8VWX0;F8W0L1;F8VZ66;F8VV47;F8W1E5;F8VWY4;F8VVE5;F8VVY0;F8VXH1;F8VQF5;F8VYH6;F8VUW9;F8VV39;F8VQZ5;F8VS54;F8W1T4;F8VV37	Rac GTPase-activating protein 1	7	1.68059	1.48954	1.82619	3
CSTF2	1.66313	0.000136501	E7EWR4;P33240-2;P33240;E9PID8;A0A0A0MT56	Cleavage stimulation factor subunit 2	9	1.74679	1.67681	1.56579	3
RNF113A	1.66049	0.00198468	O15541	RING finger protein 113A	6	1.86144	NA	1.45954	2
RBM14	1.65873	0.000319596	Q96PK6;Q96PK6-2	RNA-binding protein 14	34	1.58077	1.93825	1.45717	3
ASH2L	1.65408	0.000168973	F5H8F7;Q9UBL3-3;Q9UBL3;Q9UBL3-2;H0YBF6;H0YAQ0	Set1/Ash2 histone methyltransferase complex subunit ASH2	4	1.79917	1.50503	1.65805	3
NIPBL	1.65233	0.00053028	Q6KC79-2;Q6KC79;Q6KC79-3	Nipped-B-like protein	10	2.01792	1.51324	1.42584	3
DEK	1.65229	0.000146356	P35659;B4DFG0;P35659-2;D6RDA2;D6R9L5;H0Y8X0;H0Y993	Protein DEK	10	1.75924	1.53406	1.66357	3
SIN3A	1.65122	0.000536913	Q96ST3;H3BP90;H3BNZ3	Paired amphipathic helix protein Sin3a	19	1.84266	1.28012	1.83086	3
BTAF1	1.64977	0.000248133	A0A0A0MTH9;O14981;O14981-2	TATA-binding protein-associated factor 172	12	1.81094	1.41381	1.72456	3
GTF3C2	1.63601	0.000181311	Q8WUA4;A0A087WZD8;Q8WUA4-2;H0Y4Q6;H7C1A9;H7C318	General transcription factor 3C polypeptide 2	6	1.69875	1.74833	1.46095	3
NOL9	1.63593	0.000352413	Q5SY16	Polynucleotide 5-hydroxyl-kinase NOL9	9	1.48743	1.93338	1.48697	3
TOP2B	1.63476	0.000127853	E9PCY5;Q02880-2;Q02880	DNA topoisomerase 2;DNA topoisomerase 2-beta	13	1.60748	1.67527	1.62152	3
AHCTF1	1.62756	0.00251898	Q8WYP5;Q8WYP5-3;Q8WYP5-2	Protein ELYS	10	1.85507	NA	1.40005	2
TRMT1L	1.62736	0.000494159	Q7Z2T5;Q7Z2T5-2;X6RK96	TRMT1-like protein	10	1.29166	1.87755	1.71286	3
RRP1	1.62684	0.0014087	P56182;D6RE82	Ribosomal RNA processing protein 1 homolog A	7	1.75788	NA	1.4958	2
WRNIP1	1.61784	0.00189013	Q96S55-2;Q96S55;Q96S55-3;Q96S55-4	ATPase WRNIP1	7	NA	1.79589	1.43978	2
USP48	1.6124	0.000146356	Q86UV5;Q86UV5-8;Q86UV5-2;A0A0A0MRS6;Q86UV5-5;Q86UV5-3;Q86UV5-6;Q86UV5-4;Q86UV5-7;E9PJH5	Ubiquitin carboxyl-terminal hydrolase 48	8	1.70779	1.61103	1.51838	3
CHD1	1.60423	0.000150933	O14646-2;O14646;H0Y8V4;A0A087WVF4;O14647-2;O14647	Chromodomain-helicase-DNA-binding protein 1	5	1.53227	1.72535	1.55508	3
RBM6	1.59771	0.000131119	P78332;E9PGM9;F8WCA5;P78332-2;P78332-3;F8WF63;C9J250;C9JII0;C9JSL1	RNA-binding protein 6	15	1.58919	1.61777	1.58616	3
POLR3F	1.59488	0.00105501	Q9H1D9	DNA-directed RNA polymerase III subunit RPC6	4	1.55164	1.63812	NA	2
PCF11	1.59452	0.00178202	A0A0C4DGU6;E9PKN0;E9PQ01;O94913	Pre-mRNA cleavage complex 2 protein Pcf11	2	1.4344	NA	1.75463	2
CHD8	1.59407	0.00543439	Q9HCK8-2;Q9HCK8;H0YJG4;G3V2T9;H3BTW3;Q8TD26;Q3L8U1-2;Q3L8U1-3;Q3L8U1	Chromodomain-helicase-DNA-binding protein 8	12	1.9271	NA	1.26105	2
SYMPK	1.59219	0.000553117	A0A087WUE9;Q92797;M0R3C7;Q92797-2;M0R1C2;M0R180;M0QXP5	Symplekin	4	1.24239	1.81611	1.71809	3
SAFB	1.59072	0.000229433	Q15424;Q15424-4;Q15424-3;Q15424-2;K7ES42	Scaffold attachment factor B1	11	1.39001	1.73769	1.64446	3
GTF3C1	1.58188	0.000553117	Q12789;Q12789-3;H3BRD0;H3BU37;I3L1Z3;H3BU55	General transcription factor 3C polypeptide 1	35	1.42347	1.93138	1.39078	3
MRE11A	1.57886	0.00152446	F8W7U8;P49959-2;P49959;P49959-3;F5GXT0;F5H742;F5H256	Double-strand break repair protein MRE11A	6	1.28108	2.09048	1.36502	3
SUMO2	1.57634	0.000508698	P61956-2;P61956;A8MUA9;A8MU27;Q6EEV6;P55854;P55854-2	Small ubiquitin-related modifier 2	3	1.24257	1.72006	1.76638	3
RIF1	1.57555	0.000150933	Q5UIP0-2;Q5UIP0;H7BZN3;H7C2B5	Telomere-associated protein RIF1	24	1.65076	1.59822	1.47768	3
CEBPZ	1.574	0.00105211	A0A087X1N2;Q03701	CCAAT/enhancer-binding protein zeta	8	1.5727	NA	1.57531	2
COIL	1.56853	0.000771486	P38432	Coilin	5	1.24896	1.93538	1.52125	3
TSR1	1.56415	0.000398374	Q2NL82;I3L1Q5;I3L4E8	Pre-rRNA-processing protein TSR1 homolog	13	1.48254	1.36317	1.84675	3
ZCCHC8	1.5625	0.000516152	Q6NZY4-2;Q6NZY4;F5H6J5;F5GX80	Zinc finger CCHC domain-containing protein 8	4	1.43835	1.89099	1.35817	3
WDR43	1.56126	0.000140513	Q15061;C9JEE7;C9IZK7	WD repeat-containing protein 43	6	1.51697	1.56282	1.60398	3
CBX3	1.56005	0.000363039	Q13185;C9JMM0;B8ZZ43;S4R2Y4	Chromobox protein homolog 3	5	1.28588	1.7148	1.67947	3
ZNF24	1.55756	0.00108884	P17028;K7EQP8;K7EPZ8;K7EPL1;P17028-2	Zinc finger protein 24	4	1.55792	NA	1.55719	2
WAC	1.5573	0.00181242	Q9BTA9-2;Q9BTA9;A0A0A0MRT2;Q9BTA9-5;Q9BTA9-3	WW domain-containing adapter protein with coiled-coil	3	1.70708	1.40752	NA	2
XPO5	1.55431	0.000386168	Q9HAV4;H0Y9I3;E2QRM3;H0Y3W3	Exportin-5	26	1.2731	1.71	1.67983	3
RPL4	1.55304	0.00113047	P36578;H3BTP7;H3BU31;H3BM89	60S ribosomal protein L4	4	1.51939	1.58669	NA	2
RCOR1	1.55204	0.00260821	J3KN32;Q9UKL0;E9PQE5;B4DV59;Q9P2K3-2;Q9P2K3-4;Q9P2K3;Q8IZ40;Q9P2K3-3	REST corepressor 1	3	1.76073	NA	1.34335	2
EFTUD2	1.55115	0.000150933	Q15029-2;Q15029-3;Q15029;K7EP67;K7EJ74;K7EIT3;K7EIV5	116 kDa U5 small nuclear ribonucleoprotein component	37	1.6099	1.46603	1.57754	3
RNMT	1.548	0.000186083	K7EP06;O43148;O43148-2;K7ERH6	mRNA cap guanine-N7 methyltransferase	7	1.66885	1.56032	1.41484	3
RBBP7	1.54502	0.000144275	E9PC52;Q16576;Q5JP01;C9JAJ9;Q5JNZ6;Q5JP02	Histone-binding protein RBBP7	9	1.60127	1.51521	1.51859	3
PSIP1	1.54424	0.00144685	O75475;O75475-3;O75475-2	PC4 and SFRS1-interacting protein	3	1.64589	NA	1.4426	2
SAMHD1	1.53274	0.000288401	Q9Y3Z3-4;Q9Y3Z3;Q9Y3Z3-3;Q9Y3Z3-2	Deoxynucleoside triphosphate triphosphohydrolase SAMHD1	6	1.3104	1.61466	1.67315	3
TOP2A	1.53149	0.000332281	P11388;P11388-2;P11388-3;P11388-4;J3KTB7	DNA topoisomerase 2-alpha	12	1.39753	1.41727	1.77968	3
MECP2	1.52792	0.00201953	A0A087WXF0;P51608;P51608-2;A0A087X1U4	Methyl-CpG-binding protein 2	2	1.68751	NA	1.36832	2
ELAC2	1.52641	0.00067267	Q9BQ52-4;Q9BQ52;G5E9D5;E7ES68;Q9BQ52-3;Q9BQ52-2;V9GZ72;V9GYS7;H7C2I4;J3QRS2;V9GYU5;J3QL08;J3QLK4	Zinc phosphodiesterase ELAC protein 2	8	1.16556	1.70279	1.71088	3
FNBP4	1.52512	0.0019428	Q8N3X1;Q8N3X1-2	Formin-binding protein 4	8	1.79348	0.994	1.78789	3
MDC1	1.52152	0.000150933	Q14676-2;Q14676;Q14676-3;Q14676-4;A2AB05;H0Y6Z8	Mediator of DNA damage checkpoint protein 1	28	1.55031	1.55513	1.45912	3
HCFC1	1.52077	0.0005018	A6NEM2;P51610-4;P51610-2;P51610;H7C1C4;P51610-3	Host cell factor 1;HCF N-terminal chain 1;HCF N-terminal chain 2;HCF N-terminal chain 3;HCF N-terminal chain 4;HCF N-terminal chain 5;HCF N-terminal chain 6;HCF C-terminal chain 1;HCF C-terminal chain 2;HCF C-terminal chain 3;HCF C-terminal chain 4;HCF C-terminal chain 5;HCF C-terminal chain 6	13	1.28759	1.8159	1.4588	3
LMNA	1.51754	0.00038547	P02545;P02545-2;P02545-6;P02545-3;Q3BDU5;P02545-5;P02545-4;Q5TCI8;H0YAB0;A0A0C4DGC5	Prelamin-A/C;Lamin-A/C	22	1.34687	1.78039	1.42535	3
UHRF1	1.51486	0.000178318	A0A087WVR3;A0A087WTW0;Q96T88;Q96T88-2;A0A087WWG9	E3 ubiquitin-protein ligase UHRF1	9	1.55159	1.59311	1.39988	3
BCOR	1.51274	0.00255755	Q6W2J9-4;Q6W2J9-2;Q6W2J9;H7BYY2;Q6W2J9-3;A1A564;A6NE70;H7BZ37;H7C2V9;H7C231;A0A075B6Q3;Q5H9F3-3	BCL-6 corepressor	11	1.83536	1.76294	0.939904	3
AKAP8	1.51237	0.000869164	O43823;M0QYL4	A-kinase anchor protein 8	7	1.41489	1.89418	1.22805	3
LAS1L	1.51135	0.00234679	Q9Y4W2-2;Q9Y4W2;Q9Y4W2-3;Q9Y4W2-4	Ribosomal biogenesis protein LAS1L	10	1.04956	2.01407	1.47041	3
DNTTIP2	1.51033	0.000150933	Q5QJE6;J3KP30;E9PRB3	Deoxynucleotidyltransferase terminal-interacting protein 2	9	1.5591	1.50716	1.46472	3
FKBP10	1.50954	0.00454291	Q96AY3;H0Y827;K7ELI6;K7ESG6;Q96AY3-2;C9JPC3;K7EM43	Peptidyl-prolyl cis-trans isomerase FKBP10	7	1.58756	2.05572	0.88534	3
ZC3H11A	1.50569	0.00238569	O75152;E9PQ61;E9PBY7	Zinc finger CCCH domain-containing protein 11A	5	1.20389	2.06385	1.24932	3
HOXB9	1.50252	0.00212216	P17482	Homeobox protein Hox-B9	2	1.66157	NA	1.34346	2
RPL5	1.50114	0.00138948	P46777	60S ribosomal protein L5	5	1.15166	1.4111	1.94066	3
NCAPD3	1.49946	0.00301262	P42695;E9PKK4;G3V1A9;E9PQA3;E9PLE0	Condensin-2 complex subunit D3	8	1.28747	NA	1.71145	2
JUN	1.49419	0.000254383	P05412;P17535	Transcription factor AP-1	4	1.43568	1.36927	1.67762	3
INCENP	1.4939	0.00149081	Q9NQS7-2;Q9NQS7	Inner centromere protein	3	1.57725	NA	1.41056	2
TP53BP1	1.48525	0.000204926	A6NNK5;Q12888;Q12888-3;Q12888-2;M0R142;H7BZY0;C9JXV0;H7C495;H7C3N7	Tumor suppressor p53-binding protein 1	8	1.5037	1.59512	1.35693	3
TRRAP	1.4835	0.000209158	F2Z2U4;Q9Y4A5-2;Q9Y4A5;H0Y4W2;C9K0N1	Transformation/transcription domain-associated protein	24	1.34625	1.58588	1.51838	3
TPX2	1.46512	0.000186009	Q9ULW0;Q9ULW0-2	Targeting protein for Xklp2	21	1.56657	1.41072	1.41808	3
MMTAG2	1.46424	0.00189638	Q9BU76-4;Q9BU76;Q9BU76-3;Q9BU76-2	Multiple myeloma tumor-associated protein 2	3	1.34324	NA	1.58525	2
RAD54L2	1.46064	0.00184908	Q9Y4B4;H0Y760	Helicase ARIP4	6	1.57468	NA	1.34659	2
TCF20	1.45896	0.00343228	Q9UGU0-2;Q9UGU0;A9JX13	Transcription factor 20	10	1.24166	NA	1.67627	2
PRKDC	1.44873	0.000676378	P78527;P78527-2;F5GX40;H0YG84	DNA-dependent protein kinase catalytic subunit	181	1.24446	1.7769	1.32481	3
UGDH	1.44648	0.00337282	O60701-2;O60701;O60701-3;D6RHF4;E9PBD2;E7ER95;E7ER83;E7ETF4;E7EV97	UDP-glucose 6-dehydrogenase	3	1.08617	2.03076	1.2225	3
NUP153	1.44262	0.000503118	P49790;P49790-2;P49790-3	Nuclear pore complex protein Nup153	22	1.28339	1.72312	1.32135	3
BCAS2	1.43408	0.000172499	O75934	Pre-mRNA-splicing factor SPF27	7	1.40801	1.4204	1.47384	3
ZNF503	1.43152	0.000421869	Q96F45;Q96F45-2;A0A0A0MTG8;Q96F45-3	Zinc finger protein 503	5	1.65292	1.41851	1.22311	3
RPA2	1.42552	0.000360581	P15927;P15927-2;P15927-3;Q5TEJ7;Q5TEJ0	Replication protein A 32 kDa subunit	7	1.64423	1.29531	1.33703	3
POLE	1.42323	0.000393535	Q07864;F5H1D6;F5H7E4	DNA polymerase epsilon catalytic subunit A;DNA polymerase	28	1.3206	1.65595	1.29314	3
TRUB1	1.41815	0.000405232	Q8WWH5	Probable tRNA pseudouridine synthase 1	4	1.48078	1.58419	1.18948	3
SMC3	1.40203	0.000603645	Q9UQE7	Structural maintenance of chromosomes protein 3	42	1.12413	1.62541	1.45654	3
SLU7	1.4017	0.00526252	O95391	Pre-mRNA-splicing factor SLU7	2	1.28936	2.01271	0.903038	3
PDCD4	1.40103	0.000489875	Q53EL6-2;Q53EL6;Q5VZS7	Programmed cell death protein 4	9	1.66006	1.25761	1.2854	3
DAZAP1	1.39824	0.00134646	K7EQ55;K7EK33;Q96EP5;K7EQ02;Q96EP5-2	DAZ-associated protein 1	8	1.49902	0.999784	1.6959	3
GCFC2	1.39247	0.00117031	P16383-2;P16383;H7C335;P16383-3;P16383-4	GC-rich sequence DNA-binding factor 2	3	1.5433	1.6305	1.0036	3
CDK12	1.39111	0.00195108	Q9NYV4-2;Q9NYV4;J3QSD7;Q9NYV4-3	Cyclin-dependent kinase 12	12	1.8017	0.986593	1.38504	3
GTPBP4	1.38972	0.00111577	Q9BZE4-2;Q9BZE4;Q5T3R7;Q9BZE4-3	Nucleolar GTP-binding protein 1	6	1.52366	1.63371	1.01178	3
TMPO	1.38846	0.000333622	P42166;P42167-3	Lamina-associated polypeptide 2, isoform alpha;Thymopoietin;Thymopentin	28	1.56589	1.23946	1.36003	3
NOL8	1.3873	0.0029538	F8WE42;F5H101;Q76FK4-4;Q76FK4;F5GWN9;F5GXV1;F5H532;F5H0I5;F5H8B8;A0A0A0MSJ1;Q76FK4-2	Nucleolar protein 8	4	1.55533	NA	1.21928	2
MED13	1.37813	0.00406945	Q9UHV7	Mediator of RNA polymerase II transcription subunit 13	7	1.59154	NA	1.16472	2
GMPS	1.37593	0.000693209	P49915;P49915-2	GMP synthase [glutamine-hydrolyzing]	16	1.12803	1.6554	1.34437	3
RBM4B	1.36906	0.00199984	Q9BQ04;H0YDG8	RNA-binding protein 4B	20	NA	1.45533	1.2828	2
MDN1	1.36338	0.000268098	Q9NU22;Q5T795;M0QXR3	Midasin	60	1.26999	1.49436	1.32579	3
BCCIP	1.35654	0.000249748	Q9P287-3;Q9P287;Q9P287-4;Q9P287-2	BRCA2 and CDKN1A-interacting protein	5	1.32014	1.46639	1.28309	3
HEATR1	1.35537	0.000249589	Q9H583;Q5T3Q7;Q6P664	HEAT repeat-containing protein 1;HEAT repeat-containing protein 1, N-terminally processed	30	1.25906	1.44848	1.35857	3
CD63;SS18	1.3542	0.00205618	J3KRP6;J3QS72;X6R3J2;J3QQM2;J3KT74;J3QQW2;Q15532-2;Q15532;F5GWN1;J3QSB3;J3QSG1;J3QQW6;J3QLJ7;J3QQX5;J3KT22;B4DLD3	Protein SSXT	3	1.27017	NA	1.43824	2
CELF1	1.3511	0.000481828	G5EA30;Q92879-2;Q92879-3;Q92879-6;Q92879;Q92879-4;Q92879-5;E9PQK4;E9PSH0;E9PKU1;E9PKA1;F5H4Y5;F5H0D8;V9GYD9;Q5VZZ6;A0A0J9YX66;E9PC62;A0A0J9YXJ0;O95319-5;O95319-2;O95319;O95319-4;O95319-3	CUGBP Elav-like family member 1	8	1.52005	1.12499	1.40828	3
MKI67	1.34715	0.000591554	A0A087WV66;P46013;P46013-2	Antigen KI-67	40	1.3883	1.55567	1.09748	3
UBA3	1.34356	0.00330521	F8W8D4;Q8TBC4-2;Q8TBC4	NEDD8-activating enzyme E1 catalytic subunit	3	NA	1.17575	1.51137	2
DCUN1D5	1.33733	0.000210177	Q9BTE7;E9PM04;H0YCN4;E9PQV9;H0Y9C5;E9PLH8;E9PM78;H0YD80;E9PLS2;H0Y907;Q92564-2;Q92564;Q92564-3	DCN1-like protein 5;DCN1-like protein	4	1.36642	1.3421	1.30346	3
SF3B3	1.33397	0.000793249	Q15393;Q15393-3;Q15393-2;J3QL37;J3QRB2;I3L4G7;H3BMB0	Splicing factor 3B subunit 3	29	1.07368	1.60549	1.32274	3
POLR1A	1.33087	0.000272332	B9ZVN9;O95602	DNA-directed RNA polymerase;DNA-directed RNA polymerase I subunit RPA1	15	1.287	1.25683	1.4488	3
BPTF	1.32737	0.00245362	E7ETD6;Q12830-4;Q12830-2;Q12830;F5GXF5;A0A0A0MR81;J3QQQ8;E9PE19;J3KSY0;J3QQK4;J3KSK9	Nucleosome-remodeling factor subunit BPTF	16	1.1044	1.80451	1.0732	3
DFFA	1.32675	0.000821969	O00273	DNA fragmentation factor subunit alpha	13	1.39665	1.03097	1.55262	3
DNAJC9	1.30485	0.000792941	Q8WXX5	DnaJ homolog subfamily C member 9	6	1.49175	1.01478	1.40801	3
TMPO	1.30219	0.00053028	P42167;G5E972;P42167-2;H0YJH7	Lamina-associated polypeptide 2, isoforms beta/gamma;Thymopoietin;Thymopentin	24	1.43792	1.07457	1.39408	3
UBLCP1	1.28339	0.000329539	Q8WVY7	Ubiquitin-like domain-containing CTD phosphatase 1	3	1.39764	1.1689	1.28363	3
PRMT1	1.28184	0.000679249	E9PKG1;H7C2I1;Q99873-3;Q99873-2;Q99873-4;Q99873;E9PIX6;E9PQ98;A0A087X1W2;E9PNR9;H0YDE4;Q9NR22-2;Q9NR22;E9PMW9;E9PMZ2	Protein arginine N-methyltransferase 1	12	1.36804	1.02545	1.45202	3
POLD1	1.26491	0.000296996	M0R2B7;P28340;M0QZR8;M0QXE6;M0QXQ2;M0QZB4;M0R3H8	DNA polymerase;DNA polymerase delta catalytic subunit	14	1.17255	1.3058	1.31638	3
MCMBP	1.25689	0.000456244	Q9BTE3-2;Q9BTE3-3	Mini-chromosome maintenance complex-binding protein	16	1.18148	1.43851	1.15069	3
NOL11	1.25173	0.000673985	Q9H8H0;J3QLQ6;Q9H8H0-2;J3QR28	Nucleolar protein 11	5	1.02475	1.44546	1.28499	3
POLR3A	1.25169	0.00216184	O14802	DNA-directed RNA polymerase III subunit RPC1	7	0.843743	1.36754	1.54379	3
MAT2A	1.2363	0.000615614	P31153;P31153-2;Q00266	S-adenosylmethionine synthase isoform type-2	13	1.29178	1.02084	1.39627	3
CUL3	1.21452	0.000311105	Q13618-2;Q13618;Q13618-3;A0A087X1R9;H7C1L6;A0A087WTG3	Cullin-3	8	1.2186	1.26249	1.16247	3
PUS1	1.19881	0.000553117	F5H1S9;G8JLB3;Q9Y606-2;Q9Y606;F5H168;F5GY32;F8W9U5;F5H1B2;F5GXL3	tRNA pseudouridine synthase;tRNA pseudouridine synthase A, mitochondrial	4	1.01507	1.30982	1.27155	3
URB1	1.19022	0.00520107	O60287	Nucleolar pre-ribosomal-associated protein 1	8	1.36608	NA	1.01436	2
NTHL1	1.18806	0.00090089	H3BRL9;P78549-3;P78549-2;P78549	Endonuclease III-like protein 1	2	1.26442	1.36452	0.935233	3
PPP1CA	1.18712	0.000743477	P62136;P62136-2;E9PMD7;P62136-3;E7ETD8;H0Y3Y6;F5H1L6;F5H037;F8WE71	Serine/threonine-protein phosphatase PP1-alpha catalytic subunit;Serine/threonine-protein phosphatase	11	0.959177	1.32118	1.28102	3
CPSF3	1.17581	0.00134646	Q9UKF6;G5E9W3	Cleavage and polyadenylation specificity factor subunit 3	7	1.01707	1.48641	1.02396	3
PTGS2	1.17237	0.000449547	P35354;A0A087X296;P23219-4;P23219-3;P23219-2;P23219;P23219-6;P23219-5	Prostaglandin G/H synthase 2	3	1.05395	1.18536	1.27781	3
RRP1B	1.17051	0.000455552	Q14684;Q14684-2	Ribosomal RNA processing protein 1 homolog B	14	1.21301	1.25749	1.04103	3
RAN	1.16911	0.000555125	B5MDF5;P62826;J3KQE5;F5H018;H0YFC6;B4DV51;A0A087X0W0	GTP-binding nuclear protein Ran	10	1.04956	1.12393	1.33382	3
PML	1.16438	0.000454065	P29590-2;P29590-5;P29590-9;P29590-3;P29590-8;P29590;P29590-4;P29590-12;P29590-13;P29590-11;H3BT57;P29590-14;P29590-10;H3BT29;H3BUJ5;H3BVD2	Protein PML	11	1.08025	1.28877	1.12413	3
USP28	1.14942	0.000678072	B4E3L3;Q96RU2-2;Q96RU2;G3V1N5;H0YG96;Q96RU2-3;H0YFT9;H0YFX3	Ubiquitin carboxyl-terminal hydrolase;Ubiquitin carboxyl-terminal hydrolase 28	5	0.973134	1.309	1.16614	3
DUT	1.1475	0.000635557	H0YNW5;H0YKC5;P33316-2;P33316;H0YMM5;A0A0C4DGL3;H0YNJ9;H0YKI0	Deoxyuridine 5-triphosphate nucleotidohydrolase, mitochondrial	3	1.10232	1.32297	1.01721	3
DDB1	1.1428	0.000421745	Q16531;F5GY55;Q16531-2;F5GWI0;F5GZY8;F5H2L3;F5GYG8;F5H198	DNA damage-binding protein 1	27	1.16549	1.05464	1.20827	3
CASP14	1.13716	0.00372574	P31944	Caspase-14;Caspase-14 subunit p19;Caspase-14 subunit p10	8	1.05436	1.21996	NA	2
NT5DC1	1.12647	0.000452551	Q5TFE4;Q5TFE4-2;Q5QPD0;H0YDA5	5-nucleotidase domain-containing protein 1	13	1.10098	1.05818	1.22027	3
RFC4	1.11805	0.00131007	P35249;C9JZI1;P35249-2;C9J8M3;C9JXZ7;C9JTT7;C9JGY5;F8WE44;H7C1P0	Replication factor C subunit 4	6	1.214	0.844707	1.29543	3
POLR2B	1.11699	0.00324676	C9J2Y9;P30876;C9J4M6;C9JMN3;C9JZW8	DNA-directed RNA polymerase;DNA-directed RNA polymerase II subunit RPB2	31	0.884012	1.52562	0.941332	3
RNASEH2A	1.11404	0.00354302	O75792	Ribonuclease H2 subunit A	2	1.06819	1.15989	NA	2
SMCHD1	1.11182	0.00251898	A6NHR9;A6NHR9-2;J3KTL8;A6NHR9-3;J3QSH1;J3KRK8	Structural maintenance of chromosomes flexible hinge domain-containing protein 1	27	0.866077	1.47508	0.99429	3
RTFDC1	1.10937	0.00240861	A0A0A0MQR2;Q9BY42;A2A2L5;A2A2L6	Protein RTF2 homolog	3	1.1477	0.777704	1.40272	3
GRWD1	1.10934	0.000548628	Q9BQ67;M0QX71	Glutamate-rich WD repeat-containing protein 1	5	1.01321	1.23137	1.08345	3
CSE1L	1.10252	0.000553117	P55060;P55060-3;P55060-4;P55060-2	Exportin-2	39	0.9855	1.11929	1.20276	3
APIP	1.09982	0.001915	Q96GX9;S4R3D6;Q96GX9-3	Methylthioribulose-1-phosphate dehydratase	4	0.897318	1.41889	0.98324	3
KIF23	1.09723	0.00135994	H7BYN4;Q02241-3;Q02241-2;Q02241;H0YKQ5	Kinesin-like protein KIF23	4	0.98083	1.3681	0.942758	3
CWF19L2	1.09357	0.00377032	Q2TBE0;H0YE03;H7C3G7;Q2TBE0-3;Q2TBE0-2	CWF19-like protein 2	4	1.04865	NA	1.13849	2
WDR61	1.09099	0.00397147	H3BQA8;H0YL19;H0YN81;Q9GZS3;H0YLA1;H0YMF9	WD repeat-containing protein 61;WD repeat-containing protein 61, N-terminally processed	3	1.0309	NA	1.15108	2
FAM208A	1.07562	0.00442912	Q9UK61-3;Q9UK61-4;Q9UK61;Q9UK61-2;A0A087X0F1	Protein FAM208A	12	0.99458	NA	1.15666	2
RFC2	1.07218	0.000533939	P35250-2;P35250;A0A087WVY3;H7C5P4;H7C5S7;H7C5P1;H7C5Q7;F8WC37;H7C5A0;H7C5G4	Replication factor C subunit 2	4	0.98251	1.13724	1.0968	3
SMC1A	1.04982	0.00631023	Q14683;G8JLG1;H0Y7K8;V9GY57;V9GYN9	Structural maintenance of chromosomes protein 1A	47	0.78509	1.52482	0.839557	3
PPIH	1.03606	0.00745491	O43447;H0YEL5;C9JQD4;O43447-2	Peptidyl-prolyl cis-trans isomerase H;Peptidyl-prolyl cis-trans isomerase	3	0.877273	NA	1.19484	2
HMBS	1.03574	0.00194761	F5H345;P08397-4;P08397-3;P08397-2;P08397;F5GY90;F5H226;F5H4W5;F5H4X2;F5H0P4	Porphobilinogen deaminase	3	1.11623	1.23756	0.753433	3
RPL11	1.02704	0.008962	P62913;Q5VVC9;Q5VVC8;P62913-2	60S ribosomal protein L11	2	0.588325	1.48805	1.00475	3
NUP50	1.02335	0.00164499	Q9UKX7-2;Q9UKX7;B0QY21	Nuclear pore complex protein Nup50	5	0.860287	1.279	0.930775	3
CUL4B	1.01826	0.00149081	K4DI93;Q13620-1;Q13620;Q13620-3;A6NE76;A0A087WWN2	Cullin-4B	20	1.14529	0.776862	1.13264	3
NUB1	1.0171	0.00256157	H3BM14;H3BM74;Q9Y5A7-2;Q9Y5A7;C9JRT6;F8WDB6;C9J7X7;F8WDL9;H7C5N1	NEDD8 ultimate buster 1	7	0.703721	1.1151	1.23248	3
DCAF7	1.01288	0.000915151	P61962;A0A087WWI6;P61962-2	DDB1- and CUL4-associated factor 7	4	0.879471	1.16163	0.997545	3
UBA1	1.01272	0.0015574	P22314-2;P22314;Q5JRR6;Q5JRR9;Q5JRS0;Q5JRS2;Q5JRS1;Q5JRS3	Ubiquitin-like modifier-activating enzyme 1	47	1.09849	0.77104	1.16864	3
NNT	1.00988	0.00434952	Q13423;E9PCX7;D6RAI5;D6RHU2;D6RCR6;H0Y8P5	NAD(P) transhydrogenase, mitochondrial	15	0.74373	0.89243	1.39347	3
NANS	1.00865	0.000889822	Q9NR45;Q5TBR0;Q5TBR1	Sialic acid synthase	4	1.11716	1.0504	0.858379	3
